# Supplementary material for: Structural insights into Frizzled3 through nanobody modulators
Source: Nat Commun. 2024 Aug 22;15:7228. doi: 10.1038/s41467-024-51451-1 (PMC11341715; doi:10.1038/s41467-024-51451-1)
Supplement: Supplementary file 3 — Supplementary Data 1 [file 41467_2024_51451_MOESM3_ESM.xlsx]

## Sheet: Sheet1
Oligos
Name	sequence 5' to 3'	Usage
TU89	CCTTGAGCTCTTCGTCCCTGAGACTCTCCTG	For Nb9-Megabody cloning
EP230	AGGACTGCTCTTCCACTGGAGACGGTGACCTGGGT	For Nb9-Megabody cloning
Nb8-nanoF	CTGAAACCGGTCAGGTGCAGCT	For Nb8 nanobody cloning
Nb8-nano-R	ctgaggtaccGCCGGATCCGCTGCCACTGGAGA	For Nb8 nanobody cloning
FZD3-CRD_F	CAGTGAATTCGCCACCATGGCTATGACTTG	For FZD3 CRD cloning
FZD3_CRD_R	CTCCGGTACCCTCATCACAATCTGGGAAC	For FZD3 CRD cloning
FZD3-Full_F	catggaattcaccATGGCCATGACCTGGATCGTGT	For FZD3 full length cloning
FZD3_Full_R	cagtggtaccGGCGGAGGTGCCGTCCTCTTC	For FZD3 full length cloning
FZD3-trancate-F	cagtACCGGTTTTTCTTGTGAACCTATTACCTT	For FZD3 trancated
FZD3-trancate-R	cagtGGTACCGGGATCTCTCAGCAGGCTCTGG	For FZD3 trancated
FZD6_F	GGCCGAATTCGCCACCATGGAGATGT	For FZD6 full length cloning
FZD6_R	CAGTGGTACCAAAAAACCCAGCCCATTCTG	For FZD6 full length cloning
DEP-F	cagtGAATTCACCATGGGTCTCTCCGTCCATACGGAC	For DVL-DEP domain cloing
DEP-R	cagtggtaccCTGCTCAGAGAAGGTGATCTTG	For DVL-DEP domain cloing
