# Supplementary material for: Structural insights into Frizzled3 through nanobody modulators
Source: Nat Commun. 2024 Aug 22;15:7228. doi: 10.1038/s41467-024-51451-1 (PMC11341715; doi:10.1038/s41467-024-51451-1)
Supplement: Supplementary file 4 — Source Data [file 41467_2024_51451_MOESM4_ESM.xlsx]

## Sheet: Fig1a
BLI sensorgrams for Fig.1a Nb8 binds to FZD3
time (s)	response(nm) 100 nM	fit	response(nm) 50 nM	fit	response(nm) 25 nM	fit	response(nm) 12.5 nM	fit
0	0.011	0	0.004	0	0.01	0	0.001	0
0.2	0.012	0.004	0.005	0.002	0.01	0.001	0.001	0
0.4	0.013	0.008	0.007	0.004	0.011	0.002	0.002	0.001
0.6	0.015	0.012	0.008	0.006	0.011	0.003	0.003	0.001
0.8	0.016	0.016	0.01	0.008	0.011	0.004	0.003	0.002
1	0.018	0.02	0.011	0.01	0.012	0.005	0.004	0.002
1.2	0.02	0.024	0.013	0.012	0.013	0.006	0.005	0.003
1.4	0.023	0.028	0.014	0.014	0.013	0.007	0.006	0.003
1.6	0.026	0.032	0.016	0.016	0.014	0.008	0.006	0.004
1.8	0.028	0.035	0.017	0.017	0.015	0.009	0.007	0.004
2	0.031	0.039	0.019	0.019	0.017	0.01	0.008	0.005
2.2	0.034	0.043	0.02	0.021	0.017	0.011	0.008	0.005
2.4	0.036	0.046	0.021	0.023	0.018	0.012	0.009	0.006
2.6	0.039	0.05	0.023	0.025	0.02	0.013	0.009	0.006
2.8	0.042	0.053	0.025	0.027	0.021	0.014	0.01	0.007
3	0.044	0.057	0.026	0.028	0.022	0.015	0.011	0.007
3.2	0.046	0.06	0.027	0.03	0.023	0.016	0.012	0.008
3.4	0.049	0.064	0.029	0.032	0.024	0.017	0.013	0.008
3.6	0.052	0.067	0.029	0.034	0.024	0.018	0.012	0.009
3.8	0.053	0.07	0.03	0.035	0.024	0.019	0.013	0.009
4	0.055	0.074	0.031	0.037	0.025	0.02	0.013	0.01
4.2	0.057	0.077	0.033	0.039	0.025	0.021	0.013	0.01
4.4	0.06	0.08	0.033	0.041	0.026	0.022	0.014	0.011
4.6	0.062	0.083	0.035	0.042	0.026	0.023	0.014	0.011
4.8	0.064	0.086	0.036	0.044	0.027	0.024	0.014	0.012
5	0.066	0.089	0.037	0.046	0.028	0.025	0.015	0.012
5.2	0.068	0.092	0.038	0.047	0.028	0.026	0.015	0.012
5.4	0.071	0.095	0.039	0.049	0.029	0.026	0.016	0.013
5.6	0.074	0.098	0.041	0.051	0.03	0.027	0.016	0.013
5.8	0.077	0.101	0.042	0.052	0.031	0.028	0.018	0.014
6	0.079	0.104	0.044	0.054	0.033	0.029	0.018	0.014
6.2	0.082	0.107	0.045	0.055	0.034	0.03	0.019	0.015
6.4	0.085	0.11	0.046	0.057	0.036	0.031	0.02	0.015
6.6	0.088	0.112	0.048	0.059	0.037	0.032	0.02	0.016
6.8	0.091	0.115	0.049	0.06	0.039	0.033	0.021	0.016
7	0.093	0.118	0.051	0.062	0.04	0.034	0.022	0.016
7.2	0.095	0.12	0.051	0.063	0.041	0.035	0.022	0.017
7.4	0.098	0.123	0.053	0.065	0.042	0.035	0.023	0.017
7.6	0.1	0.126	0.054	0.066	0.042	0.036	0.023	0.018
7.8	0.102	0.128	0.055	0.068	0.043	0.037	0.024	0.018
8	0.105	0.131	0.057	0.069	0.044	0.038	0.024	0.019
8.2	0.107	0.133	0.058	0.071	0.045	0.039	0.024	0.019
8.4	0.109	0.136	0.06	0.072	0.045	0.04	0.025	0.02
8.6	0.112	0.138	0.062	0.074	0.045	0.041	0.025	0.02
8.8	0.114	0.14	0.063	0.075	0.046	0.041	0.025	0.02
9	0.116	0.143	0.064	0.077	0.046	0.042	0.026	0.021
9.2	0.118	0.145	0.066	0.078	0.046	0.043	0.026	0.021
9.4	0.12	0.147	0.067	0.08	0.047	0.044	0.026	0.022
9.6	0.122	0.15	0.068	0.081	0.047	0.045	0.026	0.022
9.8	0.124	0.152	0.069	0.082	0.047	0.046	0.026	0.023
10	0.126	0.154	0.07	0.084	0.048	0.047	0.026	0.023
10.2	0.128	0.156	0.07	0.085	0.049	0.047	0.026	0.023
10.4	0.13	0.159	0.071	0.087	0.049	0.048	0.026	0.024
10.6	0.132	0.161	0.073	0.088	0.049	0.049	0.027	0.024
10.8	0.135	0.163	0.074	0.089	0.051	0.05	0.028	0.025
11	0.136	0.165	0.075	0.091	0.051	0.051	0.028	0.025
11.2	0.138	0.167	0.076	0.092	0.052	0.051	0.029	0.026
11.4	0.141	0.169	0.077	0.093	0.053	0.052	0.029	0.026
11.6	0.143	0.171	0.078	0.095	0.053	0.053	0.03	0.026
11.8	0.146	0.173	0.078	0.096	0.054	0.054	0.03	0.027
12	0.148	0.175	0.08	0.097	0.055	0.055	0.03	0.027
12.2	0.151	0.177	0.081	0.098	0.056	0.055	0.031	0.028
12.4	0.153	0.179	0.083	0.1	0.056	0.056	0.032	0.028
12.6	0.155	0.181	0.084	0.101	0.057	0.057	0.032	0.028
12.8	0.157	0.182	0.086	0.102	0.057	0.058	0.032	0.029
13	0.159	0.184	0.087	0.104	0.058	0.059	0.032	0.029
13.2	0.16	0.186	0.088	0.105	0.058	0.059	0.032	0.03
13.4	0.162	0.188	0.089	0.106	0.059	0.06	0.032	0.03
13.6	0.164	0.19	0.091	0.107	0.059	0.061	0.033	0.03
13.8	0.166	0.191	0.092	0.108	0.06	0.062	0.033	0.031
14	0.168	0.193	0.092	0.11	0.06	0.062	0.033	0.031
14.2	0.17	0.195	0.094	0.111	0.061	0.063	0.033	0.032
14.4	0.173	0.196	0.095	0.112	0.061	0.064	0.033	0.032
14.6	0.175	0.198	0.096	0.113	0.061	0.065	0.034	0.032
14.8	0.177	0.2	0.097	0.114	0.062	0.065	0.034	0.033
15	0.179	0.201	0.097	0.116	0.062	0.066	0.034	0.033
15.2	0.181	0.203	0.098	0.117	0.063	0.067	0.035	0.034
15.4	0.184	0.204	0.099	0.118	0.063	0.068	0.035	0.034
15.6	0.186	0.206	0.1	0.119	0.064	0.068	0.035	0.034
15.8	0.188	0.208	0.101	0.12	0.064	0.069	0.035	0.035
16	0.191	0.209	0.101	0.121	0.065	0.07	0.037	0.035
16.2	0.193	0.211	0.102	0.122	0.066	0.07	0.037	0.035
16.4	0.195	0.212	0.104	0.123	0.067	0.071	0.038	0.036
16.6	0.197	0.213	0.105	0.125	0.068	0.072	0.039	0.036
16.8	0.198	0.215	0.107	0.126	0.069	0.073	0.039	0.037
17	0.2	0.216	0.108	0.127	0.07	0.073	0.039	0.037
17.2	0.202	0.218	0.11	0.128	0.071	0.074	0.04	0.037
17.4	0.204	0.219	0.111	0.129	0.071	0.075	0.041	0.038
17.6	0.206	0.22	0.112	0.13	0.072	0.075	0.041	0.038
17.8	0.208	0.222	0.113	0.131	0.073	0.076	0.041	0.038
18	0.211	0.223	0.115	0.132	0.073	0.077	0.041	0.039
18.2	0.213	0.224	0.116	0.133	0.074	0.077	0.042	0.039
18.4	0.215	0.226	0.118	0.134	0.074	0.078	0.042	0.04
18.6	0.217	0.227	0.119	0.135	0.075	0.079	0.043	0.04
18.8	0.219	0.228	0.12	0.136	0.075	0.079	0.042	0.04
19	0.22	0.23	0.121	0.137	0.075	0.08	0.042	0.041
19.2	0.222	0.231	0.122	0.138	0.076	0.081	0.042	0.041
19.4	0.223	0.232	0.123	0.139	0.076	0.081	0.042	0.041
19.6	0.225	0.233	0.124	0.14	0.077	0.082	0.042	0.042
19.8	0.227	0.234	0.124	0.141	0.077	0.083	0.042	0.042
20	0.228	0.236	0.125	0.142	0.077	0.083	0.043	0.042
20.2	0.229	0.237	0.125	0.143	0.078	0.084	0.043	0.043
20.4	0.231	0.238	0.126	0.144	0.079	0.085	0.043	0.043
20.6	0.233	0.239	0.127	0.145	0.079	0.085	0.044	0.044
20.8	0.234	0.24	0.128	0.146	0.08	0.086	0.044	0.044
21	0.236	0.241	0.129	0.147	0.08	0.087	0.045	0.044
21.2	0.238	0.242	0.13	0.148	0.081	0.087	0.046	0.045
21.4	0.24	0.243	0.131	0.149	0.081	0.088	0.046	0.045
21.6	0.242	0.244	0.132	0.15	0.082	0.089	0.047	0.045
21.8	0.244	0.245	0.134	0.15	0.083	0.089	0.047	0.046
22	0.246	0.246	0.135	0.151	0.084	0.09	0.048	0.046
22.2	0.248	0.247	0.136	0.152	0.085	0.09	0.049	0.046
22.4	0.249	0.249	0.137	0.153	0.085	0.091	0.048	0.047
22.6	0.25	0.249	0.137	0.154	0.085	0.092	0.049	0.047
22.8	0.251	0.25	0.138	0.155	0.085	0.092	0.048	0.047
23	0.253	0.251	0.139	0.156	0.086	0.093	0.048	0.048
23.2	0.254	0.252	0.14	0.157	0.087	0.094	0.049	0.048
23.4	0.255	0.253	0.141	0.157	0.088	0.094	0.049	0.048
23.6	0.257	0.254	0.142	0.158	0.088	0.095	0.049	0.049
23.8	0.258	0.255	0.142	0.159	0.088	0.095	0.049	0.049
24	0.259	0.256	0.143	0.16	0.089	0.096	0.049	0.049
24.2	0.26	0.257	0.143	0.161	0.089	0.097	0.048	0.05
24.4	0.261	0.258	0.144	0.162	0.09	0.097	0.049	0.05
24.6	0.263	0.259	0.145	0.162	0.091	0.098	0.049	0.05
24.8	0.264	0.26	0.146	0.163	0.091	0.098	0.049	0.051
25	0.265	0.26	0.147	0.164	0.092	0.099	0.05	0.051
25.2	0.266	0.261	0.148	0.165	0.093	0.1	0.05	0.051
25.4	0.267	0.262	0.15	0.166	0.094	0.1	0.051	0.052
25.6	0.269	0.263	0.151	0.166	0.094	0.101	0.051	0.052
25.8	0.27	0.264	0.152	0.167	0.094	0.101	0.051	0.052
26	0.271	0.265	0.153	0.168	0.095	0.102	0.052	0.053
26.2	0.272	0.265	0.154	0.169	0.095	0.102	0.052	0.053
26.4	0.274	0.266	0.155	0.17	0.095	0.103	0.052	0.053
26.6	0.275	0.267	0.156	0.17	0.096	0.104	0.052	0.054
26.8	0.276	0.268	0.157	0.171	0.097	0.104	0.052	0.054
27	0.278	0.268	0.158	0.172	0.097	0.105	0.053	0.054
27.2	0.279	0.269	0.159	0.173	0.097	0.105	0.053	0.055
27.4	0.28	0.27	0.16	0.173	0.097	0.106	0.054	0.055
27.6	0.281	0.271	0.161	0.174	0.098	0.106	0.054	0.055
27.8	0.282	0.271	0.161	0.175	0.098	0.107	0.054	0.055
28	0.284	0.272	0.163	0.176	0.099	0.107	0.055	0.056
28.2	0.285	0.273	0.164	0.176	0.099	0.108	0.055	0.056
28.4	0.286	0.273	0.165	0.177	0.1	0.108	0.056	0.056
28.6	0.287	0.274	0.165	0.178	0.101	0.109	0.056	0.057
28.8	0.288	0.275	0.166	0.178	0.102	0.11	0.056	0.057
29	0.289	0.275	0.167	0.179	0.102	0.11	0.057	0.057
29.2	0.29	0.276	0.168	0.18	0.103	0.111	0.057	0.058
29.4	0.292	0.277	0.169	0.18	0.103	0.111	0.057	0.058
29.6	0.293	0.277	0.17	0.181	0.103	0.112	0.058	0.058
29.8	0.293	0.278	0.171	0.182	0.103	0.112	0.058	0.059
30	0.294	0.279	0.171	0.182	0.104	0.113	0.058	0.059
30.2	0.295	0.279	0.172	0.183	0.104	0.113	0.057	0.059
30.4	0.295	0.28	0.172	0.184	0.105	0.114	0.058	0.059
30.6	0.296	0.28	0.173	0.184	0.105	0.114	0.058	0.06
30.8	0.297	0.281	0.174	0.185	0.105	0.115	0.058	0.06
31	0.297	0.281	0.175	0.186	0.106	0.115	0.059	0.06
31.2	0.298	0.282	0.175	0.186	0.106	0.116	0.059	0.061
31.4	0.299	0.283	0.176	0.187	0.107	0.116	0.059	0.061
31.6	0.299	0.283	0.177	0.188	0.107	0.117	0.06	0.061
31.8	0.3	0.284	0.178	0.188	0.107	0.117	0.06	0.062
32	0.301	0.284	0.18	0.189	0.109	0.118	0.06	0.062
32.2	0.302	0.285	0.18	0.19	0.109	0.118	0.06	0.062
32.4	0.302	0.285	0.181	0.19	0.11	0.119	0.061	0.062
32.6	0.303	0.286	0.181	0.191	0.111	0.119	0.061	0.063
32.8	0.304	0.286	0.183	0.191	0.111	0.12	0.061	0.063
33	0.304	0.287	0.183	0.192	0.111	0.12	0.061	0.063
33.2	0.305	0.287	0.185	0.193	0.111	0.121	0.062	0.064
33.4	0.306	0.288	0.185	0.193	0.112	0.121	0.063	0.064
33.6	0.307	0.288	0.186	0.194	0.113	0.122	0.063	0.064
33.8	0.307	0.289	0.187	0.194	0.113	0.122	0.063	0.064
34	0.308	0.289	0.188	0.195	0.114	0.123	0.063	0.065
34.2	0.309	0.29	0.189	0.196	0.115	0.123	0.064	0.065
34.4	0.309	0.29	0.189	0.196	0.115	0.124	0.064	0.065
34.6	0.31	0.291	0.19	0.197	0.116	0.124	0.064	0.066
34.8	0.309	0.291	0.191	0.197	0.116	0.125	0.064	0.066
35	0.31	0.292	0.191	0.198	0.116	0.125	0.064	0.066
35.2	0.31	0.292	0.192	0.198	0.117	0.125	0.064	0.066
35.4	0.31	0.293	0.193	0.199	0.116	0.126	0.064	0.067
35.6	0.311	0.293	0.193	0.199	0.117	0.126	0.064	0.067
35.8	0.312	0.293	0.194	0.2	0.117	0.127	0.064	0.067
36	0.313	0.294	0.195	0.201	0.118	0.127	0.064	0.067
36.2	0.313	0.294	0.195	0.201	0.118	0.128	0.064	0.068
36.4	0.313	0.295	0.195	0.202	0.118	0.128	0.064	0.068
36.6	0.314	0.295	0.196	0.202	0.118	0.129	0.064	0.068
36.8	0.315	0.295	0.197	0.203	0.119	0.129	0.064	0.069
37	0.316	0.296	0.198	0.203	0.12	0.13	0.065	0.069
37.2	0.317	0.296	0.199	0.204	0.12	0.13	0.066	0.069
37.4	0.318	0.297	0.199	0.204	0.121	0.13	0.066	0.069
37.6	0.319	0.297	0.2	0.205	0.121	0.131	0.066	0.07
37.8	0.319	0.297	0.202	0.205	0.122	0.131	0.067	0.07
38	0.32	0.298	0.203	0.206	0.123	0.132	0.068	0.07
38.2	0.321	0.298	0.204	0.206	0.124	0.132	0.068	0.07
38.4	0.321	0.298	0.205	0.207	0.124	0.133	0.069	0.071
38.6	0.321	0.299	0.205	0.207	0.124	0.133	0.068	0.071
38.8	0.321	0.299	0.206	0.208	0.125	0.133	0.069	0.071
39	0.321	0.3	0.207	0.208	0.125	0.134	0.069	0.071
39.2	0.321	0.3	0.208	0.209	0.125	0.134	0.07	0.072
39.4	0.321	0.3	0.208	0.209	0.125	0.135	0.07	0.072
39.6	0.322	0.301	0.209	0.21	0.126	0.135	0.071	0.072
39.8	0.322	0.301	0.209	0.21	0.126	0.136	0.071	0.072
40	0.321	0.301	0.21	0.211	0.127	0.136	0.07	0.073
40.2	0.321	0.302	0.21	0.211	0.127	0.136	0.07	0.073
40.4	0.32	0.302	0.21	0.212	0.127	0.137	0.069	0.073
40.6	0.321	0.302	0.21	0.212	0.127	0.137	0.07	0.074
40.8	0.321	0.302	0.211	0.212	0.128	0.138	0.07	0.074
41	0.321	0.303	0.212	0.213	0.128	0.138	0.07	0.074
41.2	0.32	0.303	0.212	0.213	0.128	0.138	0.07	0.074
41.4	0.321	0.303	0.212	0.214	0.128	0.139	0.07	0.075
41.6	0.321	0.304	0.213	0.214	0.129	0.139	0.071	0.075
41.8	0.321	0.304	0.215	0.215	0.129	0.14	0.071	0.075
42	0.322	0.304	0.215	0.215	0.13	0.14	0.072	0.075
42.2	0.322	0.305	0.216	0.216	0.131	0.14	0.072	0.076
42.4	0.322	0.305	0.216	0.216	0.131	0.141	0.072	0.076
42.6	0.323	0.305	0.217	0.216	0.132	0.141	0.073	0.076
42.8	0.323	0.305	0.218	0.217	0.132	0.142	0.073	0.076
43	0.324	0.306	0.219	0.217	0.133	0.142	0.074	0.076
43.2	0.326	0.306	0.22	0.218	0.134	0.142	0.075	0.077
43.4	0.326	0.306	0.221	0.218	0.135	0.143	0.075	0.077
43.6	0.327	0.306	0.222	0.218	0.136	0.143	0.076	0.077
43.8	0.326	0.307	0.222	0.219	0.136	0.143	0.075	0.077
44	0.327	0.307	0.222	0.219	0.136	0.144	0.075	0.078
44.2	0.327	0.307	0.222	0.22	0.137	0.144	0.076	0.078
44.4	0.328	0.307	0.223	0.22	0.137	0.145	0.076	0.078
44.6	0.328	0.308	0.224	0.221	0.138	0.145	0.076	0.078
44.8	0.328	0.308	0.224	0.221	0.138	0.145	0.077	0.079
45	0.328	0.308	0.224	0.221	0.138	0.146	0.077	0.079
45.2	0.328	0.308	0.224	0.222	0.138	0.146	0.077	0.079
45.4	0.329	0.309	0.225	0.222	0.139	0.146	0.076	0.079
45.6	0.329	0.309	0.226	0.222	0.139	0.147	0.076	0.08
45.8	0.328	0.309	0.226	0.223	0.14	0.147	0.076	0.08
46	0.328	0.309	0.226	0.223	0.14	0.148	0.076	0.08
46.2	0.328	0.309	0.227	0.224	0.14	0.148	0.076	0.08
46.4	0.328	0.31	0.227	0.224	0.14	0.148	0.077	0.08
46.6	0.328	0.31	0.228	0.224	0.14	0.149	0.077	0.081
46.8	0.328	0.31	0.229	0.225	0.14	0.149	0.077	0.081
47	0.329	0.31	0.23	0.225	0.141	0.149	0.078	0.081
47.2	0.328	0.311	0.231	0.225	0.142	0.15	0.078	0.081
47.4	0.328	0.311	0.231	0.226	0.141	0.15	0.077	0.082
47.6	0.328	0.311	0.232	0.226	0.142	0.15	0.078	0.082
47.8	0.328	0.311	0.231	0.226	0.142	0.151	0.078	0.082
48	0.328	0.311	0.232	0.227	0.142	0.151	0.078	0.082
48.2	0.328	0.312	0.233	0.227	0.143	0.151	0.078	0.083
48.4	0.327	0.312	0.233	0.228	0.143	0.152	0.078	0.083
48.6	0.327	0.312	0.233	0.228	0.143	0.152	0.078	0.083
48.8	0.327	0.312	0.233	0.228	0.143	0.152	0.078	0.083
49	0.327	0.312	0.234	0.229	0.144	0.153	0.079	0.083
49.2	0.328	0.312	0.234	0.229	0.145	0.153	0.079	0.084
49.4	0.329	0.313	0.235	0.229	0.145	0.153	0.08	0.084
49.6	0.329	0.313	0.235	0.23	0.145	0.154	0.08	0.084
49.8	0.329	0.313	0.236	0.23	0.146	0.154	0.08	0.084
50	0.329	0.313	0.237	0.23	0.146	0.154	0.08	0.084
50.2	0.33	0.313	0.237	0.231	0.147	0.155	0.081	0.085
50.4	0.33	0.313	0.238	0.231	0.147	0.155	0.081	0.085
50.6	0.331	0.314	0.239	0.231	0.148	0.155	0.081	0.085
50.8	0.331	0.314	0.239	0.231	0.149	0.156	0.082	0.085
51	0.331	0.314	0.239	0.232	0.149	0.156	0.082	0.086
51.2	0.331	0.314	0.24	0.232	0.149	0.156	0.082	0.086
51.4	0.331	0.314	0.24	0.232	0.15	0.157	0.082	0.086
51.6	0.332	0.314	0.241	0.233	0.151	0.157	0.083	0.086
51.8	0.332	0.315	0.241	0.233	0.151	0.157	0.083	0.086
52	0.331	0.315	0.242	0.233	0.151	0.158	0.083	0.087
52.2	0.331	0.315	0.242	0.234	0.151	0.158	0.083	0.087
52.4	0.332	0.315	0.242	0.234	0.151	0.158	0.083	0.087
52.6	0.332	0.315	0.243	0.234	0.153	0.159	0.084	0.087
52.8	0.332	0.315	0.244	0.235	0.153	0.159	0.084	0.087
53	0.333	0.315	0.244	0.235	0.153	0.159	0.084	0.088
53.2	0.333	0.316	0.244	0.235	0.153	0.159	0.085	0.088
53.4	0.333	0.316	0.245	0.235	0.153	0.16	0.084	0.088
53.6	0.332	0.316	0.245	0.236	0.154	0.16	0.084	0.088
53.8	0.332	0.316	0.245	0.236	0.154	0.16	0.084	0.088
54	0.331	0.316	0.246	0.236	0.154	0.161	0.084	0.089
54.2	0.331	0.316	0.245	0.237	0.154	0.161	0.084	0.089
54.4	0.33	0.316	0.246	0.237	0.154	0.161	0.084	0.089
54.6	0.33	0.317	0.245	0.237	0.154	0.162	0.084	0.089
54.8	0.33	0.317	0.245	0.237	0.154	0.162	0.084	0.089
55	0.33	0.317	0.246	0.238	0.155	0.162	0.084	0.09
55.2	0.33	0.317	0.246	0.238	0.155	0.162	0.084	0.09
55.4	0.33	0.317	0.247	0.238	0.155	0.163	0.084	0.09
55.6	0.33	0.317	0.247	0.238	0.155	0.163	0.084	0.09
55.8	0.33	0.317	0.247	0.239	0.155	0.163	0.085	0.09
56	0.33	0.317	0.248	0.239	0.156	0.164	0.085	0.091
56.2	0.33	0.318	0.249	0.239	0.156	0.164	0.086	0.091
56.4	0.33	0.318	0.249	0.239	0.157	0.164	0.086	0.091
56.6	0.331	0.318	0.25	0.24	0.158	0.164	0.087	0.091
56.8	0.331	0.318	0.251	0.24	0.159	0.165	0.088	0.091
57	0.332	0.318	0.251	0.24	0.159	0.165	0.088	0.092
57.2	0.331	0.318	0.251	0.24	0.159	0.165	0.088	0.092
57.4	0.331	0.318	0.251	0.241	0.16	0.166	0.088	0.092
57.6	0.331	0.318	0.252	0.241	0.16	0.166	0.088	0.092
57.8	0.33	0.318	0.252	0.241	0.16	0.166	0.088	0.092
58	0.33	0.319	0.252	0.241	0.161	0.166	0.088	0.093
58.2	0.33	0.319	0.252	0.242	0.161	0.167	0.088	0.093
58.4	0.331	0.319	0.252	0.242	0.162	0.167	0.088	0.093
58.6	0.331	0.319	0.252	0.242	0.163	0.167	0.088	0.093
58.8	0.331	0.319	0.253	0.242	0.163	0.167	0.089	0.093
59	0.332	0.319	0.253	0.243	0.164	0.168	0.089	0.093
59.2	0.332	0.319	0.253	0.243	0.164	0.168	0.089	0.094
59.4	0.331	0.319	0.252	0.243	0.164	0.168	0.089	0.094
59.6	0.331	0.319	0.253	0.243	0.164	0.168	0.09	0.094
59.8	0.331	0.319	0.253	0.244	0.164	0.169	0.09	0.094
60	0.331	0.319	0.254	0.244	0.165	0.169	0.09	0.094
60.2	0.332	0.32	0.254	0.244	0.166	0.169	0.09	0.095
60.4	0.331	0.32	0.254	0.244	0.166	0.17	0.09	0.095
60.6	0.332	0.32	0.255	0.244	0.166	0.17	0.09	0.095
60.8	0.331	0.32	0.255	0.245	0.166	0.17	0.09	0.095
61	0.331	0.32	0.255	0.245	0.166	0.17	0.09	0.095
61.2	0.331	0.32	0.255	0.245	0.167	0.171	0.09	0.095
61.4	0.331	0.32	0.255	0.245	0.167	0.171	0.09	0.096
61.6	0.331	0.32	0.256	0.246	0.167	0.171	0.091	0.096
61.8	0.332	0.32	0.256	0.246	0.167	0.171	0.091	0.096
62	0.332	0.32	0.256	0.246	0.168	0.172	0.091	0.096
62.2	0.333	0.32	0.257	0.246	0.168	0.172	0.092	0.096
62.4	0.334	0.32	0.257	0.246	0.168	0.172	0.092	0.097
62.6	0.334	0.321	0.258	0.247	0.168	0.172	0.093	0.097
62.8	0.334	0.321	0.259	0.247	0.168	0.173	0.093	0.097
63	0.334	0.321	0.259	0.247	0.168	0.173	0.093	0.097
63.2	0.334	0.321	0.26	0.247	0.168	0.173	0.094	0.097
63.4	0.333	0.321	0.26	0.247	0.168	0.173	0.094	0.097
63.6	0.333	0.321	0.26	0.248	0.169	0.173	0.094	0.098
63.8	0.332	0.321	0.26	0.248	0.169	0.174	0.094	0.098
64	0.333	0.321	0.261	0.248	0.169	0.174	0.094	0.098
64.2	0.333	0.321	0.261	0.248	0.17	0.174	0.094	0.098
64.4	0.333	0.321	0.261	0.248	0.17	0.174	0.095	0.098
64.6	0.332	0.321	0.261	0.249	0.17	0.175	0.095	0.098
64.8	0.332	0.321	0.261	0.249	0.171	0.175	0.095	0.099
65	0.332	0.321	0.261	0.249	0.172	0.175	0.095	0.099
65.2	0.333	0.321	0.262	0.249	0.172	0.175	0.096	0.099
65.4	0.333	0.322	0.262	0.249	0.173	0.176	0.095	0.099
65.6	0.333	0.322	0.262	0.249	0.173	0.176	0.096	0.099
65.8	0.333	0.322	0.262	0.25	0.173	0.176	0.096	0.099
66	0.333	0.322	0.262	0.25	0.173	0.176	0.096	0.1
66.2	0.333	0.322	0.262	0.25	0.174	0.177	0.096	0.1
66.4	0.333	0.322	0.263	0.25	0.174	0.177	0.096	0.1
66.6	0.333	0.322	0.263	0.25	0.174	0.177	0.096	0.1
66.8	0.333	0.322	0.263	0.251	0.174	0.177	0.096	0.1
67	0.333	0.322	0.264	0.251	0.175	0.177	0.096	0.1
67.2	0.332	0.322	0.264	0.251	0.175	0.178	0.096	0.101
67.4	0.332	0.322	0.264	0.251	0.175	0.178	0.096	0.101
67.6	0.332	0.322	0.264	0.251	0.175	0.178	0.095	0.101
67.8	0.332	0.322	0.264	0.251	0.175	0.178	0.096	0.101
68	0.333	0.322	0.264	0.252	0.175	0.178	0.097	0.101
68.2	0.333	0.322	0.264	0.252	0.176	0.179	0.097	0.101
68.4	0.333	0.322	0.265	0.252	0.176	0.179	0.098	0.102
68.6	0.333	0.322	0.265	0.252	0.176	0.179	0.098	0.102
68.8	0.334	0.323	0.266	0.252	0.177	0.179	0.098	0.102
69	0.334	0.323	0.266	0.252	0.178	0.18	0.099	0.102
69.2	0.334	0.323	0.266	0.253	0.178	0.18	0.099	0.102
69.4	0.334	0.323	0.266	0.253	0.178	0.18	0.099	0.102
69.6	0.334	0.323	0.266	0.253	0.178	0.18	0.099	0.102
69.8	0.333	0.323	0.266	0.253	0.179	0.18	0.1	0.103
70	0.333	0.323	0.266	0.253	0.179	0.181	0.099	0.103
70.2	0.334	0.323	0.267	0.253	0.18	0.181	0.1	0.103
70.4	0.334	0.323	0.266	0.254	0.18	0.181	0.099	0.103
70.6	0.333	0.323	0.266	0.254	0.18	0.181	0.099	0.103
70.8	0.333	0.323	0.267	0.254	0.18	0.181	0.099	0.103
71	0.333	0.323	0.267	0.254	0.18	0.182	0.099	0.104
71.2	0.334	0.323	0.267	0.254	0.18	0.182	0.099	0.104
71.4	0.333	0.323	0.267	0.254	0.18	0.182	0.099	0.104
71.6	0.333	0.323	0.267	0.254	0.18	0.182	0.099	0.104
71.8	0.333	0.323	0.267	0.255	0.18	0.182	0.099	0.104
72	0.333	0.323	0.268	0.255	0.181	0.183	0.1	0.104
72.2	0.333	0.323	0.268	0.255	0.181	0.183	0.101	0.104
72.4	0.333	0.323	0.268	0.255	0.182	0.183	0.101	0.105
72.6	0.334	0.323	0.269	0.255	0.182	0.183	0.101	0.105
72.8	0.334	0.323	0.269	0.255	0.183	0.183	0.102	0.105
73	0.334	0.323	0.269	0.255	0.183	0.184	0.102	0.105
73.2	0.334	0.324	0.269	0.256	0.184	0.184	0.103	0.105
73.4	0.334	0.324	0.269	0.256	0.185	0.184	0.103	0.105
73.6	0.334	0.324	0.269	0.256	0.185	0.184	0.103	0.105
73.8	0.334	0.324	0.269	0.256	0.186	0.184	0.104	0.106
74	0.334	0.324	0.27	0.256	0.186	0.185	0.104	0.106
74.2	0.334	0.324	0.27	0.256	0.186	0.185	0.105	0.106
74.4	0.334	0.324	0.27	0.256	0.187	0.185	0.105	0.106
74.6	0.334	0.324	0.27	0.257	0.186	0.185	0.105	0.106
74.8	0.334	0.324	0.27	0.257	0.186	0.185	0.105	0.106
75	0.334	0.324	0.27	0.257	0.186	0.185	0.105	0.106
75.2	0.334	0.324	0.27	0.257	0.186	0.186	0.105	0.107
75.4	0.333	0.324	0.27	0.257	0.186	0.186	0.105	0.107
75.6	0.333	0.324	0.27	0.257	0.186	0.186	0.105	0.107
75.8	0.332	0.324	0.271	0.257	0.187	0.186	0.105	0.107
76	0.332	0.324	0.271	0.257	0.187	0.186	0.105	0.107
76.2	0.332	0.324	0.271	0.258	0.188	0.187	0.105	0.107
76.4	0.332	0.324	0.271	0.258	0.187	0.187	0.105	0.107
76.6	0.332	0.324	0.271	0.258	0.188	0.187	0.105	0.108
76.8	0.333	0.324	0.271	0.258	0.188	0.187	0.104	0.108
77	0.333	0.324	0.272	0.258	0.188	0.187	0.105	0.108
77.2	0.334	0.324	0.272	0.258	0.189	0.187	0.106	0.108
77.4	0.334	0.324	0.273	0.258	0.189	0.188	0.106	0.108
77.6	0.334	0.324	0.273	0.258	0.189	0.188	0.107	0.108
77.8	0.334	0.324	0.273	0.259	0.189	0.188	0.107	0.108
78	0.335	0.324	0.274	0.259	0.19	0.188	0.108	0.109
78.2	0.335	0.324	0.274	0.259	0.189	0.188	0.108	0.109
78.4	0.335	0.324	0.274	0.259	0.19	0.188	0.108	0.109
78.6	0.335	0.324	0.274	0.259	0.19	0.189	0.109	0.109
78.8	0.335	0.324	0.274	0.259	0.19	0.189	0.109	0.109
79	0.335	0.324	0.274	0.259	0.19	0.189	0.109	0.109
79.2	0.335	0.324	0.275	0.259	0.19	0.189	0.11	0.109
79.4	0.335	0.324	0.275	0.259	0.191	0.189	0.11	0.109
79.6	0.334	0.325	0.275	0.26	0.191	0.189	0.109	0.11
79.8	0.333	0.325	0.275	0.26	0.192	0.19	0.109	0.11
80	0.333	0.325	0.274	0.26	0.192	0.19	0.108	0.11
80.2	0.334	0.325	0.274	0.26	0.192	0.19	0.108	0.11
80.4	0.333	0.325	0.274	0.26	0.192	0.19	0.108	0.11
80.6	0.333	0.325	0.273	0.26	0.192	0.19	0.107	0.11
80.8	0.333	0.325	0.273	0.26	0.192	0.19	0.107	0.11
81	0.333	0.325	0.273	0.26	0.193	0.191	0.107	0.111
81.2	0.333	0.325	0.273	0.26	0.193	0.191	0.107	0.111
81.4	0.334	0.325	0.273	0.261	0.193	0.191	0.107	0.111
81.6	0.333	0.325	0.273	0.261	0.193	0.191	0.107	0.111
81.8	0.333	0.325	0.272	0.261	0.192	0.191	0.107	0.111
82	0.333	0.325	0.272	0.261	0.193	0.191	0.107	0.111
82.2	0.333	0.325	0.273	0.261	0.193	0.192	0.107	0.111
82.4	0.333	0.325	0.273	0.261	0.194	0.192	0.108	0.111
82.6	0.333	0.325	0.274	0.261	0.194	0.192	0.108	0.112
82.8	0.333	0.325	0.274	0.261	0.194	0.192	0.109	0.112
83	0.334	0.325	0.274	0.261	0.194	0.192	0.109	0.112
83.2	0.334	0.325	0.274	0.261	0.195	0.192	0.109	0.112
83.4	0.334	0.325	0.274	0.262	0.195	0.192	0.11	0.112
83.6	0.334	0.325	0.273	0.262	0.195	0.193	0.11	0.112
83.8	0.334	0.325	0.274	0.262	0.195	0.193	0.11	0.112
84	0.335	0.325	0.274	0.262	0.195	0.193	0.11	0.112
84.2	0.335	0.325	0.274	0.262	0.195	0.193	0.11	0.113
84.4	0.335	0.325	0.274	0.262	0.195	0.193	0.111	0.113
84.6	0.335	0.325	0.275	0.262	0.195	0.193	0.111	0.113
84.8	0.336	0.325	0.275	0.262	0.196	0.194	0.111	0.113
85	0.336	0.325	0.276	0.262	0.196	0.194	0.111	0.113
85.2	0.335	0.325	0.276	0.262	0.196	0.194	0.111	0.113
85.4	0.335	0.325	0.276	0.262	0.195	0.194	0.11	0.113
85.6	0.334	0.325	0.276	0.263	0.195	0.194	0.11	0.113
85.8	0.333	0.325	0.275	0.263	0.195	0.194	0.11	0.113
86	0.333	0.325	0.276	0.263	0.196	0.194	0.11	0.114
86.2	0.333	0.325	0.276	0.263	0.196	0.195	0.11	0.114
86.4	0.333	0.325	0.277	0.263	0.197	0.195	0.11	0.114
86.6	0.333	0.325	0.276	0.263	0.198	0.195	0.111	0.114
86.8	0.333	0.325	0.276	0.263	0.198	0.195	0.111	0.114
87	0.333	0.325	0.276	0.263	0.198	0.195	0.111	0.114
87.2	0.333	0.325	0.276	0.263	0.199	0.195	0.112	0.114
87.4	0.333	0.325	0.276	0.263	0.199	0.195	0.112	0.114
87.6	0.333	0.325	0.276	0.263	0.2	0.196	0.113	0.115
87.8	0.333	0.325	0.277	0.264	0.2	0.196	0.113	0.115
88	0.334	0.325	0.277	0.264	0.2	0.196	0.114	0.115
88.2	0.334	0.325	0.277	0.264	0.201	0.196	0.115	0.115
88.4	0.334	0.325	0.277	0.264	0.201	0.196	0.115	0.115
88.6	0.334	0.325	0.277	0.264	0.201	0.196	0.115	0.115
88.8	0.334	0.325	0.277	0.264	0.2	0.196	0.114	0.115
89	0.334	0.325	0.277	0.264	0.2	0.196	0.114	0.115
89.2	0.333	0.325	0.276	0.264	0.199	0.197	0.114	0.115
89.4	0.332	0.325	0.276	0.264	0.199	0.197	0.113	0.116
89.6	0.332	0.325	0.276	0.264	0.2	0.197	0.113	0.116
89.8	0.332	0.325	0.276	0.264	0.2	0.197	0.113	0.116
90	0.333	0.326	0.276	0.264	0.2	0.197	0.113	0.116
90.2	0.333	0.326	0.275	0.264	0.2	0.197	0.113	0.116
90.4	0.333	0.326	0.275	0.265	0.201	0.197	0.113	0.116
90.6	0.334	0.326	0.275	0.265	0.201	0.198	0.113	0.116
90.8	0.334	0.326	0.275	0.265	0.201	0.198	0.114	0.116
91	0.334	0.326	0.276	0.265	0.202	0.198	0.114	0.116
91.2	0.335	0.326	0.276	0.265	0.202	0.198	0.114	0.117
91.4	0.335	0.326	0.277	0.265	0.203	0.198	0.115	0.117
91.6	0.335	0.326	0.277	0.265	0.203	0.198	0.116	0.117
91.8	0.335	0.326	0.277	0.265	0.203	0.198	0.116	0.117
92	0.335	0.326	0.277	0.265	0.204	0.198	0.117	0.117
92.2	0.335	0.326	0.277	0.265	0.204	0.199	0.117	0.117
92.4	0.335	0.326	0.277	0.265	0.204	0.199	0.117	0.117
92.6	0.335	0.326	0.278	0.265	0.205	0.199	0.117	0.117
92.8	0.335	0.326	0.278	0.265	0.205	0.199	0.118	0.117
93	0.334	0.326	0.279	0.265	0.205	0.199	0.118	0.117
93.2	0.334	0.326	0.279	0.266	0.205	0.199	0.118	0.118
93.4	0.334	0.326	0.279	0.266	0.206	0.199	0.118	0.118
93.6	0.334	0.326	0.279	0.266	0.206	0.199	0.118	0.118
93.8	0.334	0.326	0.279	0.266	0.205	0.199	0.117	0.118
94	0.334	0.326	0.278	0.266	0.205	0.2	0.117	0.118
94.2	0.334	0.326	0.278	0.266	0.205	0.2	0.117	0.118
94.4	0.334	0.326	0.279	0.266	0.205	0.2	0.117	0.118
94.6	0.334	0.326	0.279	0.266	0.205	0.2	0.116	0.118
94.8	0.335	0.326	0.279	0.266	0.205	0.2	0.116	0.118
95	0.334	0.326	0.279	0.266	0.206	0.2	0.116	0.119
95.2	0.334	0.326	0.279	0.266	0.206	0.2	0.117	0.119
95.4	0.334	0.326	0.278	0.266	0.205	0.2	0.117	0.119
95.6	0.334	0.326	0.278	0.266	0.205	0.201	0.117	0.119
95.8	0.333	0.326	0.278	0.266	0.205	0.201	0.117	0.119
96	0.333	0.326	0.278	0.266	0.205	0.201	0.117	0.119
96.2	0.333	0.326	0.278	0.266	0.206	0.201	0.117	0.119
96.4	0.334	0.326	0.278	0.267	0.206	0.201	0.118	0.119
96.6	0.334	0.326	0.279	0.267	0.206	0.201	0.118	0.119
96.8	0.334	0.326	0.279	0.267	0.206	0.201	0.118	0.119
97	0.334	0.326	0.279	0.267	0.207	0.201	0.118	0.12
97.2	0.334	0.326	0.279	0.267	0.207	0.201	0.118	0.12
97.4	0.334	0.326	0.279	0.267	0.207	0.202	0.119	0.12
97.6	0.335	0.326	0.279	0.267	0.207	0.202	0.119	0.12
97.8	0.335	0.326	0.279	0.267	0.207	0.202	0.119	0.12
98	0.335	0.326	0.279	0.267	0.207	0.202	0.119	0.12
98.2	0.334	0.326	0.278	0.267	0.207	0.202	0.119	0.12
98.4	0.335	0.326	0.279	0.267	0.207	0.202	0.119	0.12
98.6	0.336	0.326	0.279	0.267	0.208	0.202	0.119	0.12
98.8	0.336	0.326	0.279	0.267	0.208	0.202	0.119	0.12
99	0.336	0.326	0.28	0.267	0.208	0.202	0.119	0.12
99.2	0.335	0.326	0.279	0.267	0.208	0.202	0.119	0.121
99.4	0.335	0.326	0.279	0.267	0.208	0.203	0.119	0.121
99.6	0.334	0.326	0.278	0.267	0.207	0.203	0.118	0.121
99.8	0.334	0.326	0.278	0.267	0.208	0.203	0.119	0.121
100	0.334	0.326	0.278	0.268	0.208	0.203	0.119	0.121
100.2	0.334	0.326	0.279	0.268	0.208	0.203	0.119	0.121
100.4	0.333	0.326	0.279	0.268	0.209	0.203	0.12	0.121
100.6	0.333	0.326	0.279	0.268	0.209	0.203	0.119	0.121
100.8	0.333	0.326	0.28	0.268	0.21	0.203	0.12	0.121
101	0.332	0.326	0.28	0.268	0.21	0.203	0.12	0.121
101.2	0.332	0.326	0.279	0.268	0.21	0.204	0.12	0.121
101.4	0.332	0.326	0.279	0.268	0.21	0.204	0.12	0.122
101.6	0.333	0.326	0.279	0.268	0.211	0.204	0.121	0.122
101.8	0.333	0.326	0.28	0.268	0.211	0.204	0.121	0.122
102	0.332	0.326	0.28	0.268	0.21	0.204	0.121	0.122
102.2	0.333	0.326	0.281	0.268	0.211	0.204	0.121	0.122
102.4	0.334	0.326	0.281	0.268	0.211	0.204	0.122	0.122
102.6	0.334	0.326	0.282	0.268	0.212	0.204	0.122	0.122
102.8	0.334	0.326	0.282	0.268	0.212	0.204	0.122	0.122
103	0.334	0.326	0.281	0.268	0.212	0.204	0.122	0.122
103.2	0.334	0.326	0.281	0.268	0.212	0.205	0.123	0.122
103.4	0.334	0.326	0.281	0.268	0.211	0.205	0.122	0.122
103.6	0.334	0.326	0.28	0.268	0.211	0.205	0.122	0.123
103.8	0.334	0.326	0.28	0.268	0.212	0.205	0.122	0.123
104	0.334	0.326	0.28	0.269	0.211	0.205	0.122	0.123
104.2	0.334	0.326	0.28	0.269	0.212	0.205	0.122	0.123
104.4	0.334	0.326	0.28	0.269	0.212	0.205	0.123	0.123
104.6	0.334	0.326	0.279	0.269	0.212	0.205	0.123	0.123
104.8	0.334	0.326	0.28	0.269	0.212	0.205	0.123	0.123
105	0.334	0.326	0.279	0.269	0.213	0.205	0.123	0.123
105.2	0.335	0.326	0.279	0.269	0.213	0.205	0.124	0.123
105.4	0.335	0.326	0.279	0.269	0.213	0.206	0.124	0.123
105.6	0.335	0.326	0.28	0.269	0.213	0.206	0.124	0.123
105.8	0.336	0.326	0.281	0.269	0.213	0.206	0.125	0.124
106	0.336	0.326	0.281	0.269	0.213	0.206	0.125	0.124
106.2	0.336	0.326	0.281	0.269	0.214	0.206	0.126	0.124
106.4	0.336	0.326	0.282	0.269	0.214	0.206	0.125	0.124
106.6	0.336	0.326	0.281	0.269	0.214	0.206	0.125	0.124
106.8	0.335	0.326	0.281	0.269	0.213	0.206	0.125	0.124
107	0.335	0.326	0.281	0.269	0.213	0.206	0.125	0.124
107.2	0.335	0.326	0.281	0.269	0.213	0.206	0.126	0.124
107.4	0.335	0.326	0.28	0.269	0.212	0.206	0.125	0.124
107.6	0.335	0.326	0.28	0.269	0.212	0.207	0.125	0.124
107.8	0.334	0.326	0.279	0.269	0.212	0.207	0.125	0.124
108	0.334	0.326	0.279	0.269	0.212	0.207	0.126	0.124
108.2	0.334	0.326	0.279	0.269	0.213	0.207	0.127	0.124
108.4	0.334	0.326	0.28	0.269	0.213	0.207	0.126	0.125
108.6	0.334	0.326	0.28	0.269	0.214	0.207	0.127	0.125
108.8	0.334	0.326	0.28	0.27	0.214	0.207	0.126	0.125
109	0.334	0.326	0.28	0.27	0.215	0.207	0.127	0.125
109.2	0.333	0.326	0.28	0.27	0.215	0.207	0.127	0.125
109.4	0.334	0.326	0.281	0.27	0.216	0.207	0.126	0.125
109.6	0.334	0.326	0.281	0.27	0.216	0.207	0.127	0.125
109.8	0.334	0.326	0.281	0.27	0.216	0.207	0.127	0.125
110	0.334	0.326	0.281	0.27	0.216	0.208	0.127	0.125
110.2	0.334	0.326	0.282	0.27	0.217	0.208	0.127	0.125
110.4	0.334	0.326	0.282	0.27	0.217	0.208	0.127	0.125
110.6	0.334	0.326	0.282	0.27	0.217	0.208	0.127	0.125
110.8	0.334	0.326	0.282	0.27	0.217	0.208	0.127	0.126
111	0.334	0.326	0.281	0.27	0.217	0.208	0.127	0.126
111.2	0.334	0.326	0.281	0.27	0.217	0.208	0.127	0.126
111.4	0.334	0.326	0.281	0.27	0.217	0.208	0.127	0.126
111.6	0.334	0.326	0.281	0.27	0.217	0.208	0.127	0.126
111.8	0.334	0.326	0.281	0.27	0.217	0.208	0.128	0.126
112	0.334	0.326	0.281	0.27	0.217	0.208	0.128	0.126
112.2	0.334	0.326	0.281	0.27	0.217	0.208	0.128	0.126
112.4	0.334	0.326	0.282	0.27	0.216	0.208	0.128	0.126
112.6	0.334	0.326	0.281	0.27	0.217	0.209	0.127	0.126
112.8	0.334	0.326	0.281	0.27	0.216	0.209	0.127	0.126
113	0.334	0.326	0.281	0.27	0.217	0.209	0.127	0.126
113.2	0.333	0.326	0.28	0.27	0.216	0.209	0.126	0.126
113.4	0.333	0.326	0.281	0.27	0.216	0.209	0.127	0.127
113.6	0.334	0.326	0.281	0.27	0.216	0.209	0.127	0.127
113.8	0.333	0.326	0.281	0.27	0.217	0.209	0.127	0.127
114	0.334	0.326	0.281	0.27	0.217	0.209	0.127	0.127
114.2	0.334	0.326	0.281	0.27	0.217	0.209	0.128	0.127
114.4	0.334	0.326	0.282	0.27	0.218	0.209	0.128	0.127
114.6	0.334	0.326	0.282	0.271	0.218	0.209	0.128	0.127
114.8	0.334	0.326	0.282	0.271	0.218	0.209	0.128	0.127
115	0.334	0.326	0.282	0.271	0.219	0.209	0.129	0.127
115.2	0.335	0.326	0.282	0.271	0.219	0.21	0.129	0.127
115.4	0.335	0.326	0.283	0.271	0.219	0.21	0.13	0.127
115.6	0.335	0.326	0.282	0.271	0.219	0.21	0.13	0.127
115.8	0.335	0.326	0.283	0.271	0.219	0.21	0.13	0.127
116	0.334	0.326	0.283	0.271	0.219	0.21	0.13	0.127
116.2	0.334	0.326	0.283	0.271	0.219	0.21	0.13	0.128
116.4	0.334	0.326	0.283	0.271	0.219	0.21	0.13	0.128
116.6	0.334	0.326	0.282	0.271	0.219	0.21	0.129	0.128
116.8	0.334	0.326	0.283	0.271	0.218	0.21	0.129	0.128
117	0.333	0.326	0.282	0.271	0.218	0.21	0.129	0.128
117.2	0.334	0.326	0.282	0.271	0.219	0.21	0.129	0.128
117.4	0.334	0.326	0.282	0.271	0.219	0.21	0.13	0.128
117.6	0.334	0.326	0.282	0.271	0.219	0.21	0.13	0.128
117.8	0.334	0.326	0.282	0.271	0.219	0.21	0.129	0.128
118	0.334	0.326	0.281	0.271	0.219	0.21	0.129	0.128
118.2	0.335	0.326	0.281	0.271	0.219	0.211	0.129	0.128
118.4	0.335	0.326	0.282	0.271	0.219	0.211	0.13	0.128
118.6	0.335	0.326	0.281	0.271	0.219	0.211	0.13	0.128
118.8	0.335	0.326	0.281	0.271	0.219	0.211	0.13	0.128
119	0.335	0.326	0.281	0.271	0.219	0.211	0.131	0.128
119.2	0.334	0.326	0.281	0.271	0.219	0.211	0.131	0.129
119.4	0.334	0.326	0.281	0.271	0.218	0.211	0.132	0.129
119.6	0.334	0.326	0.282	0.271	0.219	0.211	0.133	0.129
119.8	0.334	0.326	0.282	0.271	0.22	0.211	0.133	0.129
120	0.333	0.326	0.283	0.271	0.22	0.211	0.133	0.129
120.2	0.334	0.326	0.283	0.271	0.221	0.211	0.133	0.129
120.4	0.334	0.326	0.283	0.271	0.221	0.211	0.133	0.129
120.6	0.334	0.326	0.283	0.271	0.221	0.211	0.133	0.129
120.8	0.334	0.326	0.283	0.271	0.221	0.211	0.133	0.129
121	0.334	0.326	0.282	0.271	0.221	0.211	0.133	0.129
121.2	0.334	0.326	0.282	0.271	0.221	0.212	0.134	0.129
121.4	0.334	0.326	0.281	0.271	0.22	0.212	0.133	0.129
121.6	0.334	0.326	0.281	0.271	0.22	0.212	0.133	0.129
121.8	0.334	0.326	0.281	0.272	0.221	0.212	0.133	0.129
122	0.334	0.326	0.281	0.272	0.22	0.212	0.132	0.129
122.2	0.334	0.326	0.281	0.272	0.22	0.212	0.132	0.13
122.4	0.334	0.326	0.28	0.272	0.219	0.212	0.132	0.13
122.6	0.334	0.326	0.28	0.272	0.219	0.212	0.132	0.13
122.8	0.334	0.326	0.281	0.272	0.219	0.212	0.132	0.13
123	0.333	0.326	0.281	0.272	0.22	0.212	0.132	0.13
123.2	0.333	0.326	0.281	0.272	0.219	0.212	0.132	0.13
123.4	0.333	0.326	0.281	0.272	0.22	0.212	0.132	0.13
123.6	0.334	0.326	0.281	0.272	0.221	0.212	0.132	0.13
123.8	0.334	0.326	0.282	0.272	0.222	0.212	0.132	0.13
124	0.333	0.326	0.283	0.272	0.222	0.212	0.132	0.13
124.2	0.333	0.326	0.282	0.272	0.222	0.212	0.132	0.13
124.4	0.333	0.326	0.282	0.272	0.223	0.213	0.132	0.13
124.6	0.332	0.326	0.281	0.272	0.223	0.213	0.132	0.13
124.8	0.332	0.326	0.282	0.272	0.223	0.213	0.132	0.13
125	0.332	0.326	0.282	0.272	0.224	0.213	0.132	0.13
125.2	0.332	0.326	0.282	0.272	0.224	0.213	0.133	0.13
125.4	0.332	0.326	0.282	0.272	0.224	0.213	0.133	0.131
125.6	0.332	0.326	0.282	0.272	0.224	0.213	0.133	0.131
125.8	0.332	0.326	0.282	0.272	0.223	0.213	0.132	0.131
126	0.332	0.326	0.282	0.272	0.223	0.213	0.132	0.131
126.2	0.332	0.326	0.282	0.272	0.222	0.213	0.132	0.131
126.4	0.333	0.326	0.282	0.272	0.222	0.213	0.132	0.131
126.6	0.333	0.326	0.282	0.272	0.222	0.213	0.133	0.131
126.8	0.333	0.326	0.282	0.272	0.222	0.213	0.133	0.131
127	0.333	0.326	0.282	0.272	0.222	0.213	0.132	0.131
127.2	0.334	0.326	0.282	0.272	0.223	0.213	0.132	0.131
127.4	0.334	0.326	0.282	0.272	0.223	0.213	0.132	0.131
127.6	0.335	0.326	0.282	0.272	0.223	0.213	0.133	0.131
127.8	0.335	0.326	0.282	0.272	0.224	0.213	0.133	0.131
128	0.334	0.326	0.282	0.272	0.223	0.214	0.133	0.131
128.2	0.335	0.326	0.282	0.272	0.224	0.214	0.133	0.131
128.4	0.335	0.326	0.282	0.272	0.224	0.214	0.133	0.131
128.6	0.335	0.326	0.282	0.272	0.224	0.214	0.134	0.131
128.8	0.334	0.326	0.282	0.272	0.224	0.214	0.134	0.132
129	0.334	0.326	0.282	0.272	0.224	0.214	0.134	0.132
129.2	0.333	0.326	0.281	0.272	0.224	0.214	0.134	0.132
129.4	0.333	0.326	0.281	0.272	0.224	0.214	0.134	0.132
129.6	0.332	0.326	0.281	0.272	0.223	0.214	0.133	0.132
129.8	0.332	0.326	0.281	0.272	0.223	0.214	0.134	0.132
130	0.332	0.326	0.28	0.272	0.222	0.214	0.134	0.132
130.2	0.332	0.326	0.28	0.272	0.222	0.214	0.133	0.132
130.4	0.332	0.326	0.28	0.272	0.222	0.214	0.134	0.132
130.6	0.332	0.326	0.28	0.272	0.223	0.214	0.134	0.132
130.8	0.332	0.326	0.28	0.272	0.223	0.214	0.134	0.132
131	0.332	0.326	0.28	0.272	0.223	0.214	0.134	0.132
131.2	0.332	0.326	0.28	0.272	0.224	0.214	0.134	0.132
131.4	0.333	0.326	0.28	0.272	0.223	0.214	0.134	0.132
131.6	0.333	0.326	0.281	0.272	0.224	0.214	0.135	0.132
131.8	0.333	0.326	0.281	0.273	0.225	0.215	0.135	0.132
132	0.334	0.326	0.281	0.273	0.225	0.215	0.135	0.132
132.2	0.334	0.326	0.281	0.273	0.225	0.215	0.135	0.132
132.4	0.334	0.326	0.281	0.273	0.226	0.215	0.136	0.133
132.6	0.335	0.326	0.282	0.273	0.227	0.215	0.136	0.133
132.8	0.335	0.326	0.282	0.273	0.226	0.215	0.137	0.133
133	0.335	0.326	0.282	0.273	0.226	0.215	0.137	0.133
133.2	0.335	0.326	0.283	0.273	0.226	0.215	0.137	0.133
133.4	0.335	0.326	0.283	0.273	0.226	0.215	0.137	0.133
133.6	0.335	0.326	0.283	0.273	0.226	0.215	0.137	0.133
133.8	0.335	0.326	0.283	0.273	0.226	0.215	0.138	0.133
134	0.335	0.326	0.283	0.273	0.225	0.215	0.138	0.133
134.2	0.335	0.326	0.283	0.273	0.225	0.215	0.138	0.133
134.4	0.335	0.326	0.283	0.273	0.225	0.215	0.138	0.133
134.6	0.334	0.326	0.284	0.273	0.225	0.215	0.138	0.133
134.8	0.333	0.326	0.283	0.273	0.225	0.215	0.138	0.133
135	0.333	0.326	0.284	0.273	0.225	0.215	0.138	0.133
135.2	0.333	0.326	0.283	0.273	0.225	0.215	0.137	0.133
135.4	0.333	0.326	0.283	0.273	0.225	0.215	0.137	0.133
135.6	0.332	0.326	0.282	0.273	0.225	0.215	0.137	0.133
135.8	0.332	0.326	0.282	0.273	0.225	0.215	0.137	0.133
136	0.332	0.326	0.281	0.273	0.225	0.215	0.136	0.133
136.2	0.332	0.326	0.281	0.273	0.225	0.216	0.136	0.134
136.4	0.332	0.326	0.28	0.273	0.225	0.216	0.136	0.134
136.6	0.332	0.326	0.28	0.273	0.225	0.216	0.136	0.134
136.8	0.332	0.326	0.28	0.273	0.225	0.216	0.135	0.134
137	0.332	0.326	0.28	0.273	0.226	0.216	0.135	0.134
137.2	0.333	0.326	0.28	0.273	0.226	0.216	0.135	0.134
137.4	0.333	0.326	0.281	0.273	0.226	0.216	0.136	0.134
137.6	0.333	0.326	0.281	0.273	0.225	0.216	0.136	0.134
137.8	0.334	0.326	0.28	0.273	0.225	0.216	0.137	0.134
138	0.335	0.326	0.281	0.273	0.225	0.216	0.137	0.134
138.2	0.335	0.326	0.282	0.273	0.225	0.216	0.138	0.134
138.4	0.335	0.326	0.282	0.273	0.225	0.216	0.138	0.134
138.6	0.335	0.326	0.282	0.273	0.225	0.216	0.138	0.134
138.8	0.335	0.326	0.282	0.273	0.225	0.216	0.138	0.134
139	0.334	0.326	0.282	0.273	0.225	0.216	0.138	0.134
139.2	0.334	0.326	0.282	0.273	0.224	0.216	0.138	0.134
139.4	0.333	0.326	0.281	0.273	0.224	0.216	0.137	0.134
139.6	0.333	0.326	0.281	0.273	0.225	0.216	0.137	0.134
139.8	0.333	0.326	0.28	0.273	0.224	0.216	0.137	0.134
140	0.332	0.326	0.28	0.273	0.224	0.216	0.136	0.134
140.2	0.332	0.326	0.28	0.273	0.223	0.216	0.136	0.135
140.4	0.332	0.326	0.279	0.273	0.223	0.216	0.136	0.135
140.6	0.332	0.326	0.28	0.273	0.223	0.216	0.136	0.135
140.8	0.333	0.326	0.28	0.273	0.224	0.217	0.137	0.135
141	0.333	0.326	0.279	0.273	0.224	0.217	0.137	0.135
141.2	0.333	0.326	0.279	0.273	0.224	0.217	0.137	0.135
141.4	0.333	0.326	0.279	0.273	0.225	0.217	0.137	0.135
141.6	0.334	0.327	0.28	0.273	0.225	0.217	0.138	0.135
141.8	0.334	0.327	0.28	0.273	0.226	0.217	0.138	0.135
142	0.335	0.327	0.28	0.273	0.226	0.217	0.138	0.135
142.2	0.334	0.327	0.28	0.273	0.226	0.217	0.138	0.135
142.4	0.334	0.327	0.281	0.273	0.226	0.217	0.138	0.135
142.6	0.334	0.327	0.281	0.273	0.226	0.217	0.138	0.135
142.8	0.334	0.327	0.281	0.273	0.226	0.217	0.138	0.135
143	0.333	0.327	0.281	0.273	0.226	0.217	0.138	0.135
143.2	0.332	0.327	0.28	0.273	0.226	0.217	0.137	0.135
143.4	0.332	0.327	0.281	0.273	0.226	0.217	0.138	0.135
143.6	0.333	0.327	0.281	0.273	0.227	0.217	0.138	0.135
143.8	0.332	0.327	0.281	0.273	0.226	0.217	0.138	0.135
144	0.332	0.327	0.281	0.273	0.226	0.217	0.138	0.135
144.2	0.332	0.327	0.281	0.273	0.225	0.217	0.138	0.135
144.4	0.332	0.327	0.282	0.273	0.225	0.217	0.138	0.135
144.6	0.332	0.327	0.282	0.273	0.225	0.217	0.138	0.136
144.8	0.332	0.327	0.282	0.273	0.225	0.217	0.138	0.136
145	0.332	0.327	0.282	0.273	0.225	0.217	0.138	0.136
145.2	0.332	0.327	0.282	0.273	0.225	0.217	0.138	0.136
145.4	0.331	0.327	0.282	0.273	0.225	0.217	0.138	0.136
145.6	0.331	0.327	0.282	0.273	0.225	0.217	0.138	0.136
145.8	0.332	0.327	0.282	0.273	0.225	0.217	0.138	0.136
146	0.332	0.327	0.281	0.273	0.225	0.217	0.138	0.136
146.2	0.332	0.327	0.281	0.273	0.226	0.218	0.139	0.136
146.4	0.332	0.327	0.281	0.273	0.225	0.218	0.139	0.136
146.6	0.332	0.327	0.28	0.273	0.225	0.218	0.139	0.136
146.8	0.332	0.327	0.279	0.273	0.225	0.218	0.139	0.136
147	0.332	0.327	0.28	0.273	0.225	0.218	0.139	0.136
147.2	0.332	0.327	0.279	0.273	0.226	0.218	0.139	0.136
147.4	0.332	0.327	0.279	0.273	0.226	0.218	0.139	0.136
147.6	0.332	0.327	0.279	0.274	0.226	0.218	0.14	0.136
147.8	0.333	0.327	0.279	0.274	0.226	0.218	0.139	0.136
148	0.333	0.327	0.28	0.274	0.226	0.218	0.14	0.136
148.2	0.333	0.327	0.279	0.274	0.227	0.218	0.139	0.136
148.4	0.333	0.327	0.281	0.274	0.227	0.218	0.14	0.136
148.6	0.334	0.327	0.281	0.274	0.228	0.218	0.14	0.136
148.8	0.334	0.327	0.281	0.274	0.228	0.218	0.14	0.136
149	0.334	0.327	0.282	0.274	0.228	0.218	0.14	0.136
149.2	0.334	0.327	0.282	0.274	0.228	0.218	0.14	0.136
149.4	0.334	0.327	0.283	0.274	0.228	0.218	0.14	0.137
149.6	0.334	0.327	0.283	0.274	0.229	0.218	0.141	0.137
149.8	0.334	0.327	0.283	0.274	0.229	0.218	0.141	0.137
150	0.333	0.327	0.282	0.274	0.228	0.218	0.141	0.137
150.2	0.334	0.327	0.282	0.274	0.229	0.218	0.141	0.137
150.4	0.333	0.327	0.281	0.274	0.228	0.218	0.141	0.137
150.6	0.333	0.327	0.28	0.274	0.227	0.218	0.14	0.137
150.8	0.333	0.327	0.28	0.274	0.227	0.218	0.14	0.137
151	0.332	0.327	0.28	0.274	0.227	0.218	0.14	0.137
151.2	0.331	0.327	0.279	0.274	0.227	0.218	0.139	0.137
151.4	0.331	0.327	0.279	0.274	0.226	0.218	0.139	0.137
151.6	0.331	0.327	0.28	0.274	0.227	0.218	0.14	0.137
151.8	0.331	0.327	0.28	0.274	0.227	0.218	0.14	0.137
152	0.332	0.327	0.28	0.274	0.228	0.218	0.14	0.137
152.2	0.332	0.327	0.28	0.274	0.228	0.219	0.14	0.137
152.4	0.333	0.327	0.281	0.274	0.228	0.219	0.14	0.137
152.6	0.333	0.327	0.281	0.274	0.228	0.219	0.14	0.137
152.8	0.332	0.327	0.282	0.274	0.227	0.219	0.139	0.137
153	0.332	0.327	0.282	0.274	0.227	0.219	0.139	0.137
153.2	0.332	0.327	0.282	0.274	0.228	0.219	0.139	0.137
153.4	0.332	0.327	0.282	0.274	0.228	0.219	0.139	0.137
153.6	0.332	0.327	0.282	0.274	0.228	0.219	0.139	0.137
153.8	0.331	0.327	0.282	0.274	0.228	0.219	0.139	0.137
154	0.332	0.327	0.282	0.274	0.229	0.219	0.14	0.137
154.2	0.332	0.327	0.282	0.274	0.229	0.219	0.14	0.137
154.4	0.332	0.327	0.281	0.274	0.228	0.219	0.14	0.138
154.6	0.332	0.327	0.281	0.274	0.228	0.219	0.14	0.138
154.8	0.332	0.327	0.282	0.274	0.228	0.219	0.14	0.138
155	0.331	0.327	0.281	0.274	0.228	0.219	0.14	0.138
155.2	0.331	0.327	0.281	0.274	0.227	0.219	0.141	0.138
155.4	0.331	0.327	0.282	0.274	0.228	0.219	0.141	0.138
155.6	0.331	0.327	0.282	0.274	0.228	0.219	0.142	0.138
155.8	0.332	0.327	0.282	0.274	0.227	0.219	0.142	0.138
156	0.332	0.327	0.281	0.274	0.227	0.219	0.143	0.138
156.2	0.332	0.327	0.281	0.274	0.227	0.219	0.143	0.138
156.4	0.332	0.327	0.281	0.274	0.227	0.219	0.143	0.138
156.6	0.332	0.327	0.28	0.274	0.228	0.219	0.143	0.138
156.8	0.331	0.327	0.28	0.274	0.228	0.219	0.143	0.138
157	0.331	0.327	0.279	0.274	0.228	0.219	0.143	0.138
157.2	0.332	0.327	0.279	0.274	0.229	0.219	0.143	0.138
157.4	0.332	0.327	0.279	0.274	0.229	0.219	0.143	0.138
157.6	0.332	0.327	0.28	0.274	0.229	0.219	0.143	0.138
157.8	0.332	0.327	0.28	0.274	0.229	0.219	0.143	0.138
158	0.332	0.327	0.28	0.274	0.23	0.219	0.143	0.138
158.2	0.332	0.327	0.281	0.274	0.23	0.219	0.143	0.138
158.4	0.332	0.327	0.281	0.274	0.229	0.219	0.143	0.138
158.6	0.332	0.327	0.281	0.274	0.229	0.219	0.143	0.138
158.8	0.332	0.327	0.281	0.274	0.229	0.219	0.143	0.138
159	0.332	0.327	0.282	0.274	0.229	0.219	0.143	0.138
159.2	0.332	0.327	0.282	0.274	0.229	0.22	0.143	0.138
159.4	0.333	0.327	0.283	0.274	0.229	0.22	0.144	0.138
159.6	0.333	0.327	0.283	0.274	0.229	0.22	0.144	0.138
159.8	0.333	0.327	0.284	0.274	0.229	0.22	0.144	0.138
160	0.333	0.327	0.284	0.274	0.229	0.22	0.145	0.138
160.2	0.333	0.327	0.284	0.274	0.229	0.22	0.145	0.139
160.4	0.333	0.327	0.283	0.274	0.229	0.22	0.145	0.139
160.6	0.333	0.327	0.283	0.274	0.229	0.22	0.145	0.139
160.8	0.333	0.327	0.283	0.274	0.229	0.22	0.145	0.139
161	0.332	0.327	0.283	0.274	0.229	0.22	0.144	0.139
161.2	0.332	0.327	0.283	0.274	0.229	0.22	0.144	0.139
161.4	0.332	0.327	0.282	0.274	0.228	0.22	0.144	0.139
161.6	0.331	0.327	0.283	0.274	0.228	0.22	0.144	0.139
161.8	0.331	0.327	0.282	0.274	0.228	0.22	0.143	0.139
162	0.331	0.327	0.282	0.274	0.228	0.22	0.143	0.139
162.2	0.33	0.327	0.281	0.274	0.228	0.22	0.143	0.139
162.4	0.33	0.327	0.281	0.274	0.228	0.22	0.143	0.139
162.6	0.33	0.327	0.281	0.274	0.228	0.22	0.143	0.139
162.8	0.33	0.327	0.28	0.274	0.228	0.22	0.143	0.139
163	0.331	0.327	0.281	0.274	0.228	0.22	0.143	0.139
163.2	0.331	0.327	0.281	0.274	0.229	0.22	0.144	0.139
163.4	0.33	0.327	0.28	0.274	0.228	0.22	0.144	0.139
163.6	0.33	0.327	0.28	0.274	0.228	0.22	0.143	0.139
163.8	0.33	0.327	0.28	0.274	0.227	0.22	0.143	0.139
164	0.33	0.327	0.28	0.274	0.228	0.22	0.143	0.139
164.2	0.329	0.327	0.279	0.274	0.227	0.22	0.143	0.139
164.4	0.329	0.327	0.279	0.274	0.227	0.22	0.143	0.139
164.6	0.329	0.327	0.279	0.274	0.227	0.22	0.143	0.139
164.8	0.33	0.327	0.28	0.274	0.228	0.22	0.144	0.139
165	0.33	0.327	0.28	0.274	0.228	0.22	0.144	0.139
165.2	0.331	0.327	0.281	0.274	0.228	0.22	0.144	0.139
165.4	0.331	0.327	0.281	0.274	0.229	0.22	0.144	0.139
165.6	0.331	0.327	0.28	0.274	0.229	0.22	0.144	0.139
165.8	0.332	0.327	0.28	0.274	0.229	0.22	0.144	0.139
166	0.333	0.327	0.28	0.274	0.229	0.22	0.144	0.139
166.2	0.333	0.327	0.281	0.274	0.23	0.22	0.145	0.139
166.4	0.334	0.327	0.281	0.274	0.231	0.22	0.145	0.14
166.6	0.334	0.327	0.28	0.274	0.231	0.22	0.145	0.14
166.8	0.335	0.327	0.281	0.274	0.231	0.22	0.145	0.14
167	0.335	0.327	0.281	0.274	0.231	0.22	0.145	0.14
167.2	0.335	0.327	0.281	0.274	0.231	0.22	0.144	0.14
167.4	0.335	0.327	0.281	0.274	0.23	0.22	0.144	0.14
167.6	0.334	0.327	0.281	0.274	0.23	0.221	0.144	0.14
167.8	0.334	0.327	0.281	0.274	0.23	0.221	0.143	0.14
168	0.333	0.327	0.281	0.274	0.23	0.221	0.143	0.14
168.2	0.332	0.327	0.28	0.274	0.23	0.221	0.143	0.14
168.4	0.332	0.327	0.28	0.274	0.23	0.221	0.144	0.14
168.6	0.332	0.327	0.28	0.274	0.229	0.221	0.144	0.14
168.8	0.332	0.327	0.281	0.274	0.23	0.221	0.144	0.14
169	0.332	0.327	0.281	0.274	0.23	0.221	0.144	0.14
169.2	0.331	0.327	0.28	0.274	0.229	0.221	0.144	0.14
169.4	0.331	0.327	0.28	0.274	0.229	0.221	0.144	0.14
169.6	0.332	0.327	0.28	0.274	0.229	0.221	0.145	0.14
169.8	0.332	0.327	0.281	0.274	0.23	0.221	0.146	0.14
170	0.333	0.327	0.282	0.274	0.23	0.221	0.146	0.14
170.2	0.333	0.327	0.282	0.274	0.23	0.221	0.146	0.14
170.4	0.334	0.327	0.281	0.274	0.23	0.221	0.146	0.14
170.6	0.333	0.327	0.281	0.274	0.23	0.221	0.147	0.14
170.8	0.334	0.327	0.281	0.274	0.23	0.221	0.147	0.14
171	0.332	0.327	0.281	0.274	0.23	0.221	0.146	0.14
171.2	0.332	0.327	0.28	0.274	0.229	0.221	0.145	0.14
171.4	0.332	0.327	0.281	0.274	0.229	0.221	0.146	0.14
171.6	0.331	0.327	0.28	0.274	0.229	0.221	0.145	0.14
171.8	0.331	0.327	0.28	0.274	0.23	0.221	0.145	0.14
172	0.33	0.327	0.279	0.274	0.229	0.221	0.144	0.14
172.2	0.33	0.327	0.279	0.274	0.229	0.221	0.144	0.14
172.4	0.329	0.327	0.279	0.274	0.229	0.221	0.144	0.14
172.6	0.329	0.327	0.278	0.274	0.229	0.221	0.144	0.14
172.8	0.329	0.327	0.279	0.274	0.229	0.221	0.144	0.14
173	0.329	0.327	0.279	0.274	0.229	0.221	0.143	0.14
173.2	0.329	0.327	0.279	0.274	0.229	0.221	0.144	0.141
173.4	0.33	0.327	0.28	0.274	0.229	0.221	0.144	0.141
173.6	0.331	0.327	0.281	0.274	0.229	0.221	0.144	0.141
173.8	0.332	0.327	0.281	0.274	0.23	0.221	0.144	0.141
174	0.332	0.327	0.281	0.274	0.229	0.221	0.144	0.141
174.2	0.332	0.327	0.28	0.274	0.229	0.221	0.144	0.141
174.4	0.332	0.327	0.28	0.274	0.229	0.221	0.144	0.141
174.6	0.332	0.327	0.279	0.274	0.228	0.221	0.144	0.141
174.8	0.332	0.327	0.279	0.274	0.228	0.221	0.144	0.141
175	0.332	0.327	0.279	0.274	0.227	0.221	0.144	0.141
175.2	0.332	0.327	0.279	0.274	0.228	0.221	0.144	0.141
175.4	0.333	0.327	0.28	0.274	0.228	0.221	0.145	0.141
175.6	0.333	0.327	0.28	0.274	0.228	0.221	0.145	0.141
175.8	0.333	0.327	0.28	0.274	0.228	0.221	0.146	0.141
176	0.332	0.327	0.28	0.274	0.228	0.221	0.146	0.141
176.2	0.332	0.327	0.28	0.274	0.228	0.221	0.146	0.141
176.4	0.332	0.327	0.28	0.274	0.228	0.221	0.146	0.141
176.6	0.332	0.327	0.28	0.274	0.229	0.221	0.146	0.141
176.8	0.332	0.327	0.281	0.274	0.229	0.221	0.147	0.141
177	0.332	0.327	0.281	0.274	0.23	0.221	0.147	0.141
177.2	0.333	0.327	0.281	0.274	0.231	0.221	0.146	0.141
177.4	0.332	0.327	0.281	0.274	0.231	0.221	0.146	0.141
177.6	0.333	0.327	0.282	0.274	0.231	0.221	0.146	0.141
177.8	0.333	0.327	0.282	0.274	0.231	0.221	0.146	0.141
178	0.332	0.327	0.281	0.274	0.231	0.222	0.145	0.141
178.2	0.332	0.327	0.28	0.274	0.232	0.222	0.145	0.141
178.4	0.332	0.327	0.28	0.274	0.232	0.222	0.145	0.141
178.6	0.332	0.327	0.28	0.274	0.232	0.222	0.145	0.141
178.8	0.332	0.327	0.279	0.274	0.232	0.222	0.145	0.141
179	0.332	0.327	0.28	0.274	0.232	0.222	0.145	0.141
179.2	0.332	0.327	0.279	0.274	0.232	0.222	0.145	0.141
179.4	0.332	0.327	0.279	0.274	0.232	0.222	0.145	0.141
179.6	0.331	0.327	0.279	0.274	0.231	0.222	0.146	0.141
179.8	0.331	0.327	0.279	0.274	0.231	0.222	0.146	0.141
180	0.331	0.327	0.28	0.274	0.231	0.222	0.147	0.141
180.2	0.331	0.327	0.279	0.274	0.23	0.222	0.147	0.141
180.4	0.331	0.327	0.279	0.274	0.23	0.222	0.147	0.141
180.6	0.331	0.327	0.279	0.274	0.23	0.222	0.147	0.141
180.8	0.331	0.327	0.279	0.274	0.231	0.222	0.147	0.141
181	0.332	0.327	0.28	0.274	0.231	0.222	0.147	0.141
181.2	0.332	0.327	0.28	0.274	0.231	0.222	0.147	0.142
181.4	0.332	0.327	0.28	0.274	0.231	0.222	0.147	0.142
181.6	0.333	0.327	0.281	0.274	0.231	0.222	0.147	0.142
181.8	0.333	0.327	0.28	0.274	0.232	0.222	0.147	0.142
182	0.333	0.327	0.28	0.274	0.232	0.222	0.147	0.142
182.2	0.332	0.327	0.28	0.274	0.232	0.222	0.147	0.142
182.4	0.333	0.327	0.28	0.274	0.232	0.222	0.147	0.142
182.6	0.332	0.327	0.281	0.274	0.231	0.222	0.147	0.142
182.8	0.332	0.327	0.282	0.274	0.231	0.222	0.147	0.142
183	0.332	0.327	0.282	0.274	0.231	0.222	0.147	0.142
183.2	0.331	0.327	0.282	0.274	0.231	0.222	0.146	0.142
183.4	0.331	0.327	0.282	0.274	0.231	0.222	0.147	0.142
183.6	0.331	0.327	0.283	0.274	0.232	0.222	0.147	0.142
183.8	0.331	0.327	0.284	0.274	0.232	0.222	0.147	0.142
184	0.331	0.327	0.284	0.274	0.232	0.222	0.147	0.142
184.2	0.331	0.327	0.284	0.274	0.232	0.222	0.147	0.142
184.4	0.331	0.327	0.283	0.274	0.231	0.222	0.146	0.142
184.6	0.331	0.327	0.283	0.274	0.231	0.222	0.146	0.142
184.8	0.331	0.327	0.283	0.274	0.231	0.222	0.146	0.142
185	0.332	0.327	0.283	0.274	0.232	0.222	0.147	0.142
185.2	0.332	0.327	0.282	0.274	0.232	0.222	0.147	0.142
185.4	0.332	0.327	0.282	0.274	0.232	0.222	0.147	0.142
185.6	0.332	0.327	0.282	0.274	0.232	0.222	0.147	0.142
185.8	0.331	0.327	0.281	0.274	0.231	0.222	0.147	0.142
186	0.331	0.327	0.28	0.274	0.23	0.222	0.147	0.142
186.2	0.331	0.327	0.28	0.274	0.23	0.222	0.147	0.142
186.4	0.33	0.327	0.279	0.274	0.23	0.222	0.147	0.142
186.6	0.33	0.327	0.279	0.274	0.23	0.222	0.147	0.142
186.8	0.33	0.327	0.279	0.274	0.23	0.222	0.147	0.142
187	0.33	0.327	0.279	0.274	0.23	0.222	0.147	0.142
187.2	0.329	0.327	0.278	0.274	0.23	0.222	0.146	0.142
187.4	0.33	0.327	0.278	0.274	0.23	0.222	0.146	0.142
187.6	0.33	0.327	0.279	0.274	0.23	0.222	0.145	0.142
187.8	0.33	0.327	0.279	0.274	0.23	0.222	0.145	0.142
188	0.33	0.327	0.279	0.274	0.23	0.222	0.145	0.142
188.2	0.331	0.327	0.28	0.274	0.23	0.222	0.145	0.142
188.4	0.331	0.327	0.28	0.274	0.23	0.222	0.145	0.142
188.6	0.331	0.327	0.28	0.274	0.231	0.222	0.145	0.142
188.8	0.331	0.327	0.281	0.274	0.231	0.222	0.146	0.142
189	0.332	0.327	0.281	0.275	0.232	0.222	0.146	0.142
189.2	0.332	0.327	0.281	0.275	0.232	0.222	0.146	0.142
189.4	0.331	0.327	0.281	0.275	0.232	0.222	0.146	0.142
189.6	0.331	0.327	0.281	0.275	0.232	0.222	0.147	0.142
189.8	0.331	0.327	0.28	0.275	0.232	0.222	0.147	0.142
190	0.331	0.327	0.281	0.275	0.232	0.222	0.147	0.142
190.2	0.332	0.327	0.281	0.275	0.233	0.222	0.148	0.143
190.4	0.331	0.327	0.28	0.275	0.232	0.222	0.148	0.143
190.6	0.332	0.327	0.281	0.275	0.233	0.222	0.149	0.143
190.8	0.332	0.327	0.281	0.275	0.233	0.222	0.149	0.143
191	0.332	0.327	0.281	0.275	0.233	0.222	0.149	0.143
191.2	0.332	0.327	0.28	0.275	0.232	0.222	0.148	0.143
191.4	0.332	0.327	0.281	0.275	0.232	0.222	0.148	0.143
191.6	0.332	0.327	0.28	0.275	0.232	0.222	0.148	0.143
191.8	0.332	0.327	0.281	0.275	0.232	0.223	0.148	0.143
192	0.332	0.327	0.28	0.275	0.232	0.223	0.148	0.143
192.2	0.332	0.327	0.28	0.275	0.231	0.223	0.147	0.143
192.4	0.332	0.327	0.28	0.275	0.231	0.223	0.147	0.143
192.6	0.331	0.327	0.28	0.275	0.23	0.223	0.146	0.143
192.8	0.331	0.327	0.28	0.275	0.231	0.223	0.147	0.143
193	0.331	0.327	0.28	0.275	0.231	0.223	0.147	0.143
193.2	0.331	0.327	0.279	0.275	0.23	0.223	0.147	0.143
193.4	0.331	0.327	0.279	0.275	0.23	0.223	0.147	0.143
193.6	0.331	0.327	0.279	0.275	0.23	0.223	0.147	0.143
193.8	0.33	0.327	0.279	0.275	0.231	0.223	0.147	0.143
194	0.33	0.327	0.28	0.275	0.231	0.223	0.147	0.143
194.2	0.33	0.327	0.279	0.275	0.231	0.223	0.147	0.143
194.4	0.33	0.327	0.279	0.275	0.231	0.223	0.147	0.143
194.6	0.33	0.327	0.28	0.275	0.231	0.223	0.148	0.143
194.8	0.33	0.327	0.28	0.275	0.232	0.223	0.148	0.143
195	0.33	0.327	0.28	0.275	0.232	0.223	0.148	0.143
195.2	0.33	0.327	0.28	0.275	0.231	0.223	0.148	0.143
195.4	0.33	0.327	0.28	0.275	0.232	0.223	0.148	0.143
195.6	0.33	0.327	0.28	0.275	0.232	0.223	0.147	0.143
195.8	0.33	0.327	0.28	0.275	0.232	0.223	0.147	0.143
196	0.33	0.327	0.28	0.275	0.232	0.223	0.147	0.143
196.2	0.329	0.327	0.28	0.275	0.232	0.223	0.147	0.143
196.4	0.329	0.327	0.28	0.275	0.231	0.223	0.147	0.143
196.6	0.329	0.327	0.279	0.275	0.231	0.223	0.147	0.143
196.8	0.329	0.327	0.279	0.275	0.231	0.223	0.147	0.143
197	0.33	0.327	0.279	0.275	0.231	0.223	0.148	0.143
197.2	0.33	0.327	0.279	0.275	0.231	0.223	0.148	0.143
197.4	0.33	0.327	0.279	0.275	0.23	0.223	0.148	0.143
197.6	0.329	0.327	0.279	0.275	0.23	0.223	0.148	0.143
197.8	0.329	0.327	0.278	0.275	0.23	0.223	0.147	0.143
198	0.329	0.327	0.279	0.275	0.23	0.223	0.147	0.143
198.2	0.329	0.327	0.278	0.275	0.23	0.223	0.147	0.143
198.4	0.33	0.327	0.279	0.275	0.23	0.223	0.147	0.143
198.6	0.331	0.327	0.28	0.275	0.23	0.223	0.147	0.143
198.8	0.331	0.327	0.28	0.275	0.231	0.223	0.148	0.143
199	0.331	0.327	0.279	0.275	0.231	0.223	0.147	0.143
199.2	0.33	0.327	0.279	0.275	0.23	0.223	0.147	0.143
199.4	0.33	0.327	0.279	0.275	0.23	0.223	0.147	0.143
199.6	0.33	0.327	0.279	0.275	0.23	0.223	0.147	0.143
199.8	0.33	0.327	0.279	0.275	0.23	0.223	0.147	0.143
200	0.33	0.327	0.28	0.275	0.231	0.223	0.148	0.143
200.2	0.33	0.327	0.279	0.275	0.23	0.223	0.148	0.143
200.4	0.33	0.327	0.28	0.275	0.23	0.223	0.149	0.143
200.6	0.331	0.327	0.28	0.275	0.231	0.223	0.15	0.143
200.8	0.33	0.327	0.28	0.275	0.23	0.223	0.15	0.144
201	0.33	0.327	0.28	0.275	0.23	0.223	0.15	0.144
201.2	0.33	0.327	0.28	0.275	0.23	0.223	0.15	0.144
201.4	0.33	0.327	0.279	0.275	0.23	0.223	0.15	0.144
201.6	0.33	0.327	0.279	0.275	0.23	0.223	0.149	0.144
201.8	0.33	0.327	0.279	0.275	0.23	0.223	0.149	0.144
202	0.33	0.327	0.28	0.275	0.23	0.223	0.148	0.144
202.2	0.331	0.327	0.28	0.275	0.23	0.223	0.149	0.144
202.4	0.331	0.327	0.28	0.275	0.23	0.223	0.148	0.144
202.6	0.331	0.327	0.28	0.275	0.231	0.223	0.148	0.144
202.8	0.331	0.327	0.28	0.275	0.231	0.223	0.148	0.144
203	0.331	0.327	0.28	0.275	0.231	0.223	0.148	0.144
203.2	0.33	0.327	0.28	0.275	0.231	0.223	0.147	0.144
203.4	0.33	0.327	0.28	0.275	0.231	0.223	0.147	0.144
203.6	0.331	0.327	0.28	0.275	0.232	0.223	0.147	0.144
203.8	0.331	0.327	0.281	0.275	0.232	0.223	0.147	0.144
204	0.331	0.327	0.281	0.275	0.232	0.223	0.148	0.144
204.2	0.332	0.327	0.281	0.275	0.232	0.223	0.148	0.144
204.4	0.332	0.327	0.281	0.275	0.232	0.223	0.149	0.144
204.6	0.332	0.327	0.281	0.275	0.231	0.223	0.149	0.144
204.8	0.331	0.327	0.28	0.275	0.231	0.223	0.149	0.144
205	0.332	0.327	0.28	0.275	0.231	0.223	0.149	0.144
205.2	0.331	0.327	0.28	0.275	0.231	0.223	0.149	0.144
205.4	0.331	0.327	0.28	0.275	0.23	0.223	0.149	0.144
205.6	0.33	0.327	0.279	0.275	0.23	0.223	0.148	0.144
205.8	0.331	0.327	0.279	0.275	0.23	0.223	0.148	0.144
206	0.33	0.327	0.279	0.275	0.23	0.223	0.148	0.144
206.2	0.33	0.327	0.279	0.275	0.23	0.223	0.149	0.144
206.4	0.33	0.327	0.279	0.275	0.23	0.223	0.148	0.144
206.6	0.33	0.327	0.279	0.275	0.231	0.223	0.149	0.144
206.8	0.33	0.327	0.279	0.275	0.231	0.223	0.149	0.144
207	0.33	0.327	0.28	0.275	0.232	0.223	0.149	0.144
207.2	0.331	0.327	0.28	0.275	0.232	0.223	0.149	0.144
207.4	0.331	0.327	0.28	0.275	0.232	0.223	0.149	0.144
207.6	0.331	0.327	0.28	0.275	0.232	0.223	0.149	0.144
207.8	0.331	0.327	0.28	0.275	0.232	0.223	0.149	0.144
208	0.331	0.327	0.28	0.275	0.232	0.223	0.149	0.144
208.2	0.331	0.327	0.28	0.275	0.232	0.223	0.15	0.144
208.4	0.331	0.327	0.28	0.275	0.232	0.223	0.15	0.144
208.6	0.331	0.327	0.28	0.275	0.231	0.223	0.15	0.144
208.8	0.331	0.327	0.281	0.275	0.231	0.223	0.15	0.144
209	0.331	0.327	0.28	0.275	0.231	0.223	0.15	0.144
209.2	0.33	0.327	0.28	0.275	0.23	0.223	0.15	0.144
209.4	0.33	0.327	0.28	0.275	0.23	0.223	0.149	0.144
209.6	0.33	0.327	0.28	0.275	0.23	0.223	0.15	0.144
209.8	0.33	0.327	0.28	0.275	0.23	0.223	0.149	0.144
210	0.33	0.327	0.279	0.275	0.229	0.223	0.149	0.144
210.2	0.33	0.327	0.28	0.275	0.23	0.223	0.149	0.144
210.4	0.33	0.327	0.28	0.275	0.23	0.223	0.149	0.144
210.6	0.33	0.327	0.279	0.275	0.23	0.223	0.15	0.144
210.8	0.331	0.327	0.279	0.275	0.23	0.223	0.15	0.144
211	0.331	0.327	0.279	0.275	0.231	0.223	0.151	0.144
211.2	0.331	0.327	0.279	0.275	0.231	0.223	0.151	0.144
211.4	0.331	0.327	0.279	0.275	0.231	0.223	0.15	0.144
211.6	0.331	0.327	0.279	0.275	0.231	0.223	0.15	0.144
211.8	0.331	0.327	0.279	0.275	0.231	0.223	0.15	0.144
212	0.331	0.327	0.279	0.275	0.232	0.224	0.15	0.144
212.2	0.331	0.327	0.279	0.275	0.232	0.224	0.15	0.144
212.4	0.331	0.327	0.28	0.275	0.232	0.224	0.15	0.144
212.6	0.33	0.327	0.28	0.275	0.231	0.224	0.15	0.144
212.8	0.33	0.327	0.279	0.275	0.231	0.224	0.15	0.144
213	0.33	0.327	0.28	0.275	0.231	0.224	0.15	0.144
213.2	0.329	0.327	0.28	0.275	0.231	0.224	0.149	0.144
213.4	0.329	0.327	0.28	0.275	0.231	0.224	0.148	0.144
213.6	0.329	0.327	0.28	0.275	0.23	0.224	0.148	0.144
213.8	0.329	0.327	0.28	0.275	0.23	0.224	0.148	0.144
214	0.329	0.327	0.279	0.275	0.23	0.224	0.147	0.145
214.2	0.329	0.327	0.279	0.275	0.231	0.224	0.148	0.145
214.4	0.329	0.327	0.28	0.275	0.231	0.224	0.148	0.145
214.6	0.329	0.327	0.279	0.275	0.23	0.224	0.148	0.145
214.8	0.329	0.327	0.28	0.275	0.23	0.224	0.148	0.145
215	0.329	0.327	0.28	0.275	0.23	0.224	0.148	0.145
215.2	0.329	0.327	0.279	0.275	0.229	0.224	0.148	0.145
215.4	0.329	0.327	0.28	0.275	0.23	0.224	0.148	0.145
215.6	0.33	0.327	0.28	0.275	0.231	0.224	0.149	0.145
215.8	0.33	0.327	0.281	0.275	0.231	0.224	0.15	0.145
216	0.33	0.327	0.281	0.275	0.231	0.224	0.149	0.145
216.2	0.33	0.327	0.281	0.275	0.231	0.224	0.15	0.145
216.4	0.33	0.327	0.28	0.275	0.231	0.224	0.15	0.145
216.6	0.33	0.327	0.28	0.275	0.232	0.224	0.15	0.145
216.8	0.331	0.327	0.28	0.275	0.231	0.224	0.151	0.145
217	0.33	0.327	0.28	0.275	0.231	0.224	0.15	0.145
217.2	0.33	0.327	0.279	0.275	0.23	0.224	0.15	0.145
217.4	0.33	0.327	0.279	0.275	0.23	0.224	0.149	0.145
217.6	0.33	0.327	0.278	0.275	0.229	0.224	0.149	0.145
217.8	0.33	0.327	0.278	0.275	0.229	0.224	0.149	0.145
218	0.329	0.327	0.278	0.275	0.228	0.224	0.149	0.145
218.2	0.329	0.327	0.278	0.275	0.228	0.224	0.149	0.145
218.4	0.33	0.327	0.278	0.275	0.228	0.224	0.149	0.145
218.6	0.329	0.327	0.277	0.275	0.227	0.224	0.148	0.145
218.8	0.329	0.327	0.277	0.275	0.227	0.224	0.148	0.145
219	0.329	0.327	0.277	0.275	0.227	0.224	0.148	0.145
219.2	0.329	0.327	0.277	0.275	0.227	0.224	0.147	0.145
219.4	0.329	0.327	0.278	0.275	0.229	0.224	0.148	0.145
219.6	0.329	0.327	0.278	0.275	0.229	0.224	0.149	0.145
219.8	0.329	0.327	0.278	0.275	0.23	0.224	0.148	0.145
220	0.329	0.327	0.278	0.275	0.23	0.224	0.149	0.145
220.2	0.329	0.327	0.278	0.275	0.231	0.224	0.149	0.145
220.4	0.329	0.327	0.278	0.275	0.232	0.224	0.149	0.145
220.6	0.33	0.327	0.278	0.275	0.233	0.224	0.15	0.145
220.8	0.33	0.327	0.278	0.275	0.232	0.224	0.15	0.145
221	0.329	0.327	0.278	0.275	0.232	0.224	0.149	0.145
221.2	0.329	0.327	0.277	0.275	0.231	0.224	0.149	0.145
221.4	0.329	0.327	0.277	0.275	0.231	0.224	0.149	0.145
221.6	0.329	0.327	0.277	0.275	0.231	0.224	0.149	0.145
221.8	0.329	0.327	0.277	0.275	0.23	0.224	0.149	0.145
222	0.329	0.327	0.277	0.275	0.23	0.224	0.149	0.145
222.2	0.33	0.327	0.278	0.275	0.229	0.224	0.148	0.145
222.4	0.33	0.327	0.279	0.275	0.23	0.224	0.149	0.145
222.6	0.33	0.327	0.279	0.275	0.229	0.224	0.148	0.145
222.8	0.33	0.327	0.279	0.275	0.229	0.224	0.148	0.145
223	0.33	0.327	0.28	0.275	0.229	0.224	0.149	0.145
223.2	0.329	0.327	0.28	0.275	0.229	0.224	0.149	0.145
223.4	0.329	0.327	0.28	0.275	0.229	0.224	0.149	0.145
223.6	0.329	0.327	0.28	0.275	0.229	0.224	0.149	0.145
223.8	0.329	0.327	0.28	0.275	0.23	0.224	0.15	0.145
224	0.329	0.327	0.28	0.275	0.23	0.224	0.15	0.145
224.2	0.329	0.327	0.279	0.275	0.23	0.224	0.15	0.145
224.4	0.329	0.327	0.279	0.275	0.231	0.224	0.15	0.145
224.6	0.329	0.327	0.279	0.275	0.23	0.224	0.15	0.145
224.8	0.329	0.327	0.278	0.275	0.23	0.224	0.15	0.145
225	0.329	0.327	0.277	0.275	0.23	0.224	0.15	0.145
225.2	0.329	0.327	0.277	0.275	0.23	0.224	0.15	0.145
225.4	0.329	0.327	0.276	0.275	0.23	0.224	0.15	0.145
225.6	0.329	0.327	0.276	0.275	0.23	0.224	0.15	0.145
225.8	0.33	0.327	0.275	0.275	0.23	0.224	0.15	0.145
226	0.33	0.327	0.275	0.275	0.229	0.224	0.15	0.145
226.2	0.33	0.327	0.276	0.275	0.229	0.224	0.15	0.145
226.4	0.33	0.327	0.276	0.275	0.229	0.224	0.15	0.145
226.6	0.33	0.327	0.276	0.275	0.229	0.224	0.15	0.145
226.8	0.33	0.327	0.276	0.275	0.228	0.224	0.149	0.145
227	0.329	0.327	0.276	0.275	0.228	0.224	0.149	0.145
227.2	0.328	0.327	0.277	0.275	0.229	0.224	0.148	0.145
227.4	0.328	0.327	0.277	0.275	0.229	0.224	0.149	0.145
227.6	0.328	0.327	0.276	0.275	0.229	0.224	0.148	0.145
227.8	0.327	0.327	0.276	0.275	0.229	0.224	0.148	0.145
228	0.328	0.327	0.277	0.275	0.229	0.224	0.148	0.145
228.2	0.328	0.327	0.277	0.275	0.229	0.224	0.148	0.145
228.4	0.327	0.327	0.277	0.275	0.23	0.224	0.148	0.145
228.6	0.328	0.327	0.278	0.275	0.23	0.224	0.149	0.145
228.8	0.329	0.327	0.278	0.275	0.23	0.224	0.149	0.145
229	0.329	0.327	0.278	0.275	0.231	0.224	0.15	0.145
229.2	0.33	0.327	0.279	0.275	0.231	0.224	0.15	0.145
229.4	0.33	0.327	0.279	0.275	0.23	0.224	0.15	0.145
229.6	0.33	0.327	0.279	0.275	0.23	0.224	0.151	0.145
229.8	0.331	0.327	0.279	0.275	0.23	0.224	0.151	0.145
230	0.33	0.327	0.279	0.275	0.229	0.224	0.151	0.145
230.2	0.33	0.327	0.279	0.275	0.228	0.224	0.15	0.145
230.4	0.33	0.327	0.279	0.275	0.228	0.224	0.15	0.145
230.6	0.329	0.327	0.279	0.275	0.228	0.224	0.15	0.146
230.8	0.329	0.327	0.279	0.275	0.228	0.224	0.149	0.146
231	0.329	0.327	0.279	0.275	0.227	0.224	0.149	0.146
231.2	0.328	0.327	0.279	0.275	0.228	0.224	0.149	0.146
231.4	0.328	0.327	0.278	0.275	0.227	0.224	0.149	0.146
231.6	0.328	0.327	0.277	0.275	0.228	0.224	0.148	0.146
231.8	0.327	0.327	0.277	0.275	0.228	0.224	0.148	0.146
232	0.328	0.327	0.278	0.275	0.228	0.224	0.148	0.146
232.2	0.327	0.327	0.277	0.275	0.229	0.224	0.148	0.146
232.4	0.327	0.327	0.277	0.275	0.229	0.224	0.148	0.146
232.6	0.328	0.327	0.277	0.275	0.229	0.224	0.149	0.146
232.8	0.328	0.327	0.277	0.275	0.229	0.224	0.149	0.146
233	0.328	0.327	0.277	0.275	0.229	0.224	0.149	0.146
233.2	0.328	0.327	0.278	0.275	0.23	0.224	0.149	0.146
233.4	0.328	0.327	0.278	0.275	0.23	0.224	0.149	0.146
233.6	0.329	0.327	0.278	0.275	0.23	0.224	0.15	0.146
233.8	0.329	0.327	0.278	0.275	0.23	0.224	0.15	0.146
234	0.329	0.327	0.279	0.275	0.23	0.224	0.15	0.146
234.2	0.328	0.327	0.279	0.275	0.23	0.224	0.15	0.146
234.4	0.328	0.327	0.279	0.275	0.23	0.224	0.15	0.146
234.6	0.328	0.327	0.279	0.275	0.23	0.224	0.15	0.146
234.8	0.329	0.327	0.279	0.275	0.231	0.224	0.15	0.146
235	0.328	0.327	0.279	0.275	0.231	0.224	0.15	0.146
235.2	0.328	0.327	0.279	0.275	0.231	0.224	0.15	0.146
235.4	0.328	0.327	0.279	0.275	0.231	0.224	0.15	0.146
235.6	0.328	0.327	0.279	0.275	0.23	0.224	0.15	0.146
235.8	0.328	0.327	0.278	0.275	0.23	0.224	0.15	0.146
236	0.328	0.327	0.278	0.275	0.23	0.224	0.15	0.146
236.2	0.327	0.327	0.278	0.275	0.23	0.224	0.15	0.146
236.4	0.327	0.327	0.277	0.275	0.229	0.224	0.15	0.146
236.6	0.327	0.327	0.277	0.275	0.229	0.224	0.15	0.146
236.8	0.327	0.327	0.277	0.275	0.229	0.224	0.15	0.146
237	0.327	0.327	0.276	0.275	0.229	0.224	0.15	0.146
237.2	0.327	0.327	0.276	0.275	0.229	0.224	0.15	0.146
237.4	0.328	0.327	0.277	0.275	0.228	0.224	0.15	0.146
237.6	0.328	0.327	0.277	0.275	0.228	0.224	0.15	0.146
237.8	0.328	0.327	0.277	0.275	0.228	0.224	0.15	0.146
238	0.328	0.327	0.277	0.275	0.229	0.224	0.15	0.146
238.2	0.328	0.327	0.278	0.275	0.229	0.224	0.15	0.146
238.4	0.328	0.327	0.278	0.275	0.228	0.224	0.149	0.146
238.6	0.328	0.327	0.277	0.275	0.228	0.224	0.149	0.146
238.8	0.328	0.327	0.278	0.275	0.229	0.224	0.149	0.146
239	0.328	0.327	0.278	0.275	0.229	0.224	0.149	0.146
239.2	0.328	0.327	0.277	0.275	0.229	0.224	0.15	0.146
239.4	0.329	0.327	0.278	0.275	0.229	0.224	0.15	0.146
239.6	0.329	0.327	0.278	0.275	0.229	0.224	0.15	0.146
239.8	0.329	0.327	0.278	0.275	0.229	0.224	0.151	0.146
240	0.329	0.327	0.277	0.275	0.229	0.224	0.151	0.146
240.2	0.329	0.327	0.277	0.275	0.229	0.224	0.15	0.146
240.4	0.329	0.327	0.277	0.275	0.229	0.224	0.15	0.146
240.6	0.328	0.327	0.276	0.275	0.229	0.224	0.15	0.146
240.8	0.328	0.327	0.276	0.275	0.229	0.224	0.149	0.146
241	0.328	0.327	0.276	0.275	0.228	0.224	0.148	0.146
241.2	0.328	0.327	0.277	0.275	0.227	0.224	0.148	0.146
241.4	0.328	0.327	0.277	0.275	0.227	0.224	0.149	0.146
241.6	0.328	0.327	0.278	0.275	0.228	0.224	0.149	0.146
241.8	0.328	0.327	0.278	0.275	0.229	0.224	0.149	0.146
242	0.328	0.327	0.278	0.275	0.228	0.224	0.149	0.146
242.2	0.328	0.327	0.278	0.275	0.228	0.224	0.15	0.146
242.4	0.327	0.327	0.278	0.275	0.228	0.224	0.15	0.146
242.6	0.327	0.327	0.278	0.275	0.229	0.224	0.15	0.146
242.8	0.328	0.327	0.278	0.275	0.229	0.224	0.15	0.146
243	0.328	0.327	0.278	0.275	0.228	0.224	0.15	0.146
243.2	0.328	0.327	0.278	0.275	0.228	0.224	0.15	0.146
243.4	0.328	0.327	0.278	0.275	0.229	0.224	0.15	0.146
243.6	0.328	0.327	0.278	0.275	0.229	0.224	0.15	0.146
243.8	0.327	0.327	0.277	0.275	0.229	0.224	0.15	0.146
244	0.327	0.327	0.277	0.275	0.228	0.224	0.15	0.146
244.2	0.327	0.327	0.277	0.275	0.229	0.224	0.15	0.146
244.4	0.328	0.327	0.278	0.275	0.229	0.224	0.15	0.146
244.6	0.327	0.327	0.277	0.275	0.227	0.224	0.149	0.146
244.8	0.327	0.327	0.277	0.275	0.227	0.224	0.149	0.146
245	0.328	0.327	0.278	0.275	0.227	0.224	0.15	0.146
245.2	0.328	0.327	0.279	0.275	0.228	0.224	0.15	0.146
245.4	0.328	0.327	0.279	0.275	0.228	0.224	0.15	0.146
245.6	0.328	0.327	0.278	0.275	0.229	0.224	0.15	0.146
245.8	0.328	0.327	0.278	0.275	0.229	0.224	0.15	0.146
246	0.328	0.327	0.278	0.275	0.228	0.224	0.15	0.146
246.2	0.328	0.327	0.278	0.275	0.229	0.224	0.15	0.146
246.4	0.327	0.327	0.277	0.275	0.228	0.224	0.15	0.146
246.6	0.327	0.327	0.277	0.275	0.228	0.224	0.149	0.146
246.8	0.326	0.327	0.276	0.275	0.228	0.224	0.149	0.146
247	0.326	0.327	0.276	0.275	0.227	0.224	0.148	0.146
247.2	0.325	0.327	0.276	0.275	0.228	0.224	0.148	0.146
247.4	0.326	0.327	0.276	0.275	0.228	0.224	0.148	0.146
247.6	0.326	0.327	0.275	0.275	0.229	0.224	0.148	0.146
247.8	0.326	0.327	0.275	0.275	0.228	0.224	0.148	0.146
248	0.326	0.327	0.276	0.275	0.229	0.224	0.149	0.146
248.2	0.327	0.327	0.276	0.275	0.228	0.224	0.149	0.146
248.4	0.327	0.327	0.276	0.275	0.228	0.224	0.149	0.146
248.6	0.327	0.327	0.277	0.275	0.228	0.224	0.149	0.146
248.8	0.328	0.327	0.278	0.275	0.229	0.224	0.15	0.146
249	0.328	0.327	0.278	0.275	0.229	0.224	0.15	0.146
249.2	0.329	0.327	0.279	0.275	0.229	0.224	0.15	0.146
249.4	0.329	0.327	0.279	0.275	0.229	0.224	0.15	0.146
249.6	0.329	0.327	0.279	0.275	0.229	0.224	0.15	0.146
249.8	0.329	0.327	0.279	0.275	0.229	0.224	0.15	0.146
250	0.329	0.327	0.279	0.275	0.229	0.224	0.15	0.146
250.2	0.329	0.327	0.279	0.275	0.229	0.224	0.15	0.146
250.4	0.329	0.327	0.279	0.275	0.229	0.224	0.151	0.146
250.6	0.329	0.327	0.279	0.275	0.229	0.224	0.151	0.146
250.8	0.329	0.327	0.279	0.275	0.229	0.224	0.151	0.146
251	0.328	0.327	0.279	0.275	0.229	0.224	0.151	0.146
251.2	0.328	0.327	0.278	0.275	0.229	0.224	0.15	0.146
251.4	0.328	0.327	0.278	0.275	0.229	0.224	0.15	0.146
251.6	0.327	0.327	0.278	0.275	0.228	0.225	0.15	0.146
251.8	0.327	0.327	0.277	0.275	0.227	0.225	0.149	0.146
252	0.326	0.327	0.276	0.275	0.227	0.225	0.148	0.146
252.2	0.326	0.327	0.276	0.275	0.226	0.225	0.148	0.146
252.4	0.325	0.327	0.276	0.275	0.226	0.225	0.148	0.146
252.6	0.326	0.327	0.277	0.275	0.226	0.225	0.148	0.146
252.8	0.326	0.327	0.277	0.275	0.226	0.225	0.147	0.146
253	0.326	0.327	0.276	0.275	0.226	0.225	0.147	0.146
253.2	0.326	0.327	0.276	0.275	0.226	0.225	0.147	0.146
253.4	0.326	0.327	0.276	0.275	0.226	0.225	0.147	0.146
253.6	0.327	0.327	0.276	0.275	0.226	0.225	0.147	0.146
253.8	0.328	0.327	0.276	0.275	0.226	0.225	0.148	0.146
254	0.328	0.327	0.276	0.275	0.227	0.225	0.148	0.147
254.2	0.328	0.327	0.276	0.275	0.228	0.225	0.148	0.147
254.4	0.328	0.327	0.276	0.275	0.228	0.225	0.149	0.147
254.6	0.329	0.327	0.276	0.275	0.229	0.225	0.15	0.147
254.8	0.329	0.327	0.276	0.275	0.229	0.225	0.149	0.147
255	0.329	0.327	0.276	0.275	0.229	0.225	0.149	0.147
255.2	0.329	0.327	0.276	0.275	0.229	0.225	0.149	0.147
255.4	0.328	0.327	0.276	0.275	0.228	0.225	0.149	0.147
255.6	0.329	0.327	0.276	0.275	0.228	0.225	0.15	0.147
255.8	0.328	0.327	0.276	0.275	0.229	0.225	0.15	0.147
256	0.328	0.327	0.276	0.275	0.229	0.225	0.149	0.147
256.2	0.329	0.327	0.276	0.275	0.228	0.225	0.149	0.147
256.4	0.329	0.327	0.277	0.275	0.228	0.225	0.15	0.147
256.6	0.328	0.327	0.277	0.275	0.229	0.225	0.15	0.147
256.8	0.328	0.327	0.277	0.275	0.229	0.225	0.15	0.147
257	0.327	0.327	0.276	0.275	0.228	0.225	0.15	0.147
257.2	0.327	0.327	0.277	0.275	0.228	0.225	0.15	0.147
257.4	0.326	0.327	0.276	0.275	0.227	0.225	0.149	0.147
257.6	0.326	0.327	0.276	0.275	0.227	0.225	0.149	0.147
257.8	0.326	0.327	0.276	0.275	0.227	0.225	0.149	0.147
258	0.326	0.327	0.276	0.275	0.227	0.225	0.15	0.147
258.2	0.327	0.327	0.276	0.275	0.227	0.225	0.15	0.147
258.4	0.327	0.327	0.276	0.275	0.227	0.225	0.15	0.147
258.6	0.328	0.327	0.277	0.275	0.228	0.225	0.15	0.147
258.8	0.328	0.327	0.277	0.275	0.228	0.225	0.15	0.147
259	0.328	0.327	0.278	0.275	0.228	0.225	0.151	0.147
259.2	0.329	0.327	0.278	0.275	0.229	0.225	0.151	0.147
259.4	0.329	0.327	0.278	0.275	0.229	0.225	0.151	0.147
259.6	0.33	0.327	0.279	0.275	0.229	0.225	0.152	0.147
259.8	0.33	0.327	0.279	0.275	0.229	0.225	0.152	0.147
260	0.329	0.327	0.279	0.275	0.229	0.225	0.152	0.147
260.2	0.329	0.327	0.279	0.275	0.229	0.225	0.152	0.147
260.4	0.328	0.327	0.279	0.275	0.228	0.225	0.152	0.147
260.6	0.327	0.327	0.279	0.275	0.228	0.225	0.151	0.147
260.8	0.327	0.327	0.278	0.275	0.228	0.225	0.15	0.147
261	0.326	0.327	0.278	0.275	0.227	0.225	0.149	0.147
261.2	0.325	0.327	0.277	0.275	0.227	0.225	0.148	0.147
261.4	0.325	0.327	0.276	0.275	0.226	0.225	0.148	0.147
261.6	0.325	0.327	0.276	0.275	0.226	0.225	0.147	0.147
261.8	0.325	0.327	0.276	0.275	0.227	0.225	0.148	0.147
262	0.325	0.327	0.275	0.275	0.227	0.225	0.147	0.147
262.2	0.325	0.327	0.275	0.275	0.227	0.225	0.147	0.147
262.4	0.325	0.327	0.274	0.275	0.227	0.225	0.147	0.147
262.6	0.325	0.327	0.275	0.275	0.227	0.225	0.146	0.147
262.8	0.325	0.327	0.275	0.275	0.228	0.225	0.147	0.147
263	0.326	0.327	0.275	0.275	0.228	0.225	0.148	0.147
263.2	0.326	0.327	0.276	0.275	0.229	0.225	0.148	0.147
263.4	0.326	0.327	0.276	0.275	0.228	0.225	0.148	0.147
263.6	0.326	0.327	0.276	0.275	0.229	0.225	0.149	0.147
263.8	0.326	0.327	0.276	0.275	0.229	0.225	0.15	0.147
264	0.326	0.327	0.276	0.275	0.228	0.225	0.149	0.147
264.2	0.326	0.327	0.276	0.275	0.228	0.225	0.15	0.147
264.4	0.327	0.327	0.277	0.275	0.229	0.225	0.15	0.147
264.6	0.326	0.327	0.276	0.275	0.229	0.225	0.15	0.147
264.8	0.326	0.327	0.276	0.275	0.228	0.225	0.15	0.147
265	0.326	0.327	0.276	0.275	0.228	0.225	0.15	0.147
265.2	0.327	0.327	0.276	0.275	0.229	0.225	0.15	0.147
265.4	0.327	0.327	0.276	0.275	0.228	0.225	0.149	0.147
265.6	0.327	0.327	0.276	0.275	0.228	0.225	0.149	0.147
265.8	0.327	0.327	0.276	0.275	0.229	0.225	0.149	0.147
266	0.328	0.327	0.276	0.275	0.228	0.225	0.149	0.147
266.2	0.328	0.327	0.276	0.275	0.228	0.225	0.15	0.147
266.4	0.328	0.327	0.275	0.275	0.228	0.225	0.149	0.147
266.6	0.328	0.327	0.276	0.275	0.228	0.225	0.149	0.147
266.8	0.328	0.327	0.276	0.275	0.228	0.225	0.15	0.147
267	0.328	0.327	0.276	0.275	0.228	0.225	0.149	0.147
267.2	0.327	0.327	0.276	0.275	0.228	0.225	0.15	0.147
267.4	0.327	0.327	0.276	0.275	0.228	0.225	0.15	0.147
267.6	0.327	0.327	0.276	0.275	0.228	0.225	0.15	0.147
267.8	0.327	0.327	0.276	0.275	0.228	0.225	0.15	0.147
268	0.327	0.327	0.276	0.275	0.227	0.225	0.15	0.147
268.2	0.327	0.327	0.276	0.275	0.228	0.225	0.15	0.147
268.4	0.327	0.327	0.276	0.275	0.228	0.225	0.15	0.147
268.6	0.326	0.327	0.276	0.275	0.227	0.225	0.15	0.147
268.8	0.326	0.327	0.277	0.275	0.227	0.225	0.15	0.147
269	0.326	0.327	0.277	0.275	0.228	0.225	0.15	0.147
269.2	0.327	0.327	0.277	0.275	0.228	0.225	0.15	0.147
269.4	0.327	0.327	0.277	0.275	0.227	0.225	0.149	0.147
269.6	0.327	0.327	0.277	0.275	0.227	0.225	0.149	0.147
269.8	0.327	0.327	0.277	0.275	0.227	0.225	0.149	0.147
270	0.327	0.327	0.277	0.275	0.226	0.225	0.149	0.147
270.2	0.327	0.327	0.276	0.275	0.226	0.225	0.149	0.147
270.4	0.327	0.327	0.276	0.275	0.227	0.225	0.149	0.147
270.6	0.326	0.327	0.276	0.275	0.226	0.225	0.148	0.147
270.8	0.327	0.327	0.276	0.275	0.226	0.225	0.148	0.147
271	0.326	0.327	0.276	0.275	0.226	0.225	0.148	0.147
271.2	0.326	0.327	0.276	0.275	0.225	0.225	0.149	0.147
271.4	0.327	0.327	0.275	0.275	0.225	0.225	0.148	0.147
271.6	0.327	0.327	0.275	0.275	0.226	0.225	0.148	0.147
271.8	0.326	0.327	0.275	0.275	0.225	0.225	0.148	0.147
272	0.326	0.327	0.275	0.275	0.225	0.225	0.148	0.147
272.2	0.326	0.327	0.275	0.275	0.225	0.225	0.148	0.147
272.4	0.326	0.327	0.276	0.275	0.225	0.225	0.149	0.147
272.6	0.326	0.327	0.276	0.275	0.225	0.225	0.149	0.147
272.8	0.325	0.327	0.276	0.275	0.225	0.225	0.149	0.147
273	0.326	0.327	0.276	0.275	0.226	0.225	0.149	0.147
273.2	0.325	0.327	0.276	0.275	0.225	0.225	0.149	0.147
273.4	0.325	0.327	0.276	0.275	0.225	0.225	0.148	0.147
273.6	0.325	0.327	0.275	0.275	0.225	0.225	0.148	0.147
273.8	0.325	0.327	0.275	0.275	0.224	0.225	0.148	0.147
274	0.325	0.327	0.275	0.275	0.225	0.225	0.148	0.147
274.2	0.326	0.327	0.275	0.275	0.226	0.225	0.148	0.147
274.4	0.326	0.327	0.275	0.275	0.226	0.225	0.148	0.147
274.6	0.326	0.327	0.275	0.275	0.225	0.225	0.148	0.147
274.8	0.326	0.327	0.275	0.275	0.226	0.225	0.149	0.147
275	0.326	0.327	0.276	0.275	0.226	0.225	0.149	0.147
275.2	0.326	0.327	0.276	0.275	0.226	0.225	0.149	0.147
275.4	0.326	0.327	0.276	0.275	0.227	0.225	0.149	0.147
275.6	0.326	0.327	0.276	0.275	0.226	0.225	0.149	0.147
275.8	0.326	0.327	0.276	0.275	0.226	0.225	0.149	0.147
276	0.326	0.327	0.276	0.275	0.226	0.225	0.148	0.147
276.2	0.326	0.327	0.277	0.275	0.226	0.225	0.148	0.147
276.4	0.327	0.327	0.277	0.275	0.227	0.225	0.148	0.147
276.6	0.327	0.327	0.277	0.275	0.227	0.225	0.148	0.147
276.8	0.327	0.327	0.277	0.275	0.228	0.225	0.148	0.147
277	0.327	0.327	0.278	0.275	0.228	0.225	0.149	0.147
277.2	0.327	0.327	0.277	0.275	0.228	0.225	0.148	0.147
277.4	0.327	0.327	0.277	0.275	0.228	0.225	0.148	0.147
277.6	0.326	0.327	0.276	0.275	0.227	0.225	0.148	0.147
277.8	0.326	0.327	0.276	0.275	0.228	0.225	0.148	0.147
278	0.327	0.327	0.276	0.275	0.228	0.225	0.148	0.147
278.2	0.327	0.327	0.276	0.275	0.228	0.225	0.148	0.147
278.4	0.327	0.327	0.275	0.275	0.227	0.225	0.148	0.147
278.6	0.326	0.327	0.275	0.275	0.227	0.225	0.148	0.147
278.8	0.326	0.327	0.275	0.275	0.227	0.225	0.149	0.147
279	0.326	0.327	0.274	0.275	0.226	0.225	0.149	0.147
279.2	0.325	0.327	0.274	0.275	0.225	0.225	0.149	0.147
279.4	0.324	0.327	0.273	0.275	0.225	0.225	0.148	0.147
279.6	0.324	0.327	0.273	0.275	0.224	0.225	0.147	0.147
279.8	0.324	0.327	0.273	0.275	0.225	0.225	0.147	0.147
280	0.324	0.327	0.273	0.275	0.225	0.225	0.146	0.147
280.2	0.324	0.327	0.274	0.275	0.225	0.225	0.146	0.147
280.4	0.325	0.327	0.275	0.275	0.226	0.225	0.147	0.147
280.6	0.325	0.327	0.275	0.275	0.226	0.225	0.147	0.147
280.8	0.325	0.327	0.275	0.275	0.226	0.225	0.147	0.147
281	0.325	0.327	0.275	0.275	0.226	0.225	0.147	0.147
281.2	0.324	0.327	0.275	0.275	0.226	0.225	0.147	0.147
281.4	0.324	0.327	0.275	0.275	0.226	0.225	0.146	0.147
281.6	0.324	0.327	0.276	0.275	0.226	0.225	0.147	0.147
281.8	0.325	0.327	0.276	0.275	0.227	0.225	0.147	0.147
282	0.326	0.327	0.277	0.275	0.227	0.225	0.147	0.147
282.2	0.326	0.327	0.276	0.275	0.226	0.225	0.147	0.147
282.4	0.326	0.327	0.276	0.275	0.226	0.225	0.147	0.147
282.6	0.326	0.327	0.276	0.275	0.226	0.225	0.147	0.147
282.8	0.326	0.327	0.276	0.275	0.226	0.225	0.147	0.147
283	0.325	0.327	0.275	0.275	0.226	0.225	0.147	0.147
283.2	0.325	0.327	0.275	0.275	0.226	0.225	0.147	0.147
283.4	0.325	0.327	0.274	0.275	0.226	0.225	0.147	0.147
283.6	0.325	0.327	0.274	0.275	0.226	0.225	0.147	0.147
283.8	0.325	0.327	0.275	0.275	0.226	0.225	0.147	0.147
284	0.325	0.327	0.275	0.275	0.226	0.225	0.147	0.147
284.2	0.325	0.327	0.275	0.275	0.227	0.225	0.147	0.147
284.4	0.326	0.327	0.276	0.275	0.227	0.225	0.148	0.147
284.6	0.325	0.327	0.276	0.275	0.227	0.225	0.148	0.147
284.8	0.325	0.327	0.275	0.275	0.227	0.225	0.148	0.147
285	0.325	0.327	0.275	0.275	0.227	0.225	0.148	0.147
285.2	0.324	0.327	0.275	0.275	0.226	0.225	0.147	0.147
285.4	0.325	0.327	0.275	0.275	0.226	0.225	0.147	0.147
285.6	0.326	0.327	0.275	0.275	0.226	0.225	0.147	0.147
285.8	0.326	0.327	0.275	0.275	0.226	0.225	0.147	0.147
286	0.326	0.327	0.275	0.275	0.225	0.225	0.147	0.147
286.2	0.325	0.327	0.275	0.275	0.225	0.225	0.146	0.147
286.4	0.326	0.327	0.275	0.275	0.225	0.225	0.147	0.147
286.6	0.326	0.327	0.275	0.275	0.225	0.225	0.147	0.147
286.8	0.326	0.327	0.274	0.275	0.225	0.225	0.146	0.147
287	0.326	0.327	0.274	0.275	0.225	0.225	0.146	0.147
287.2	0.325	0.327	0.275	0.275	0.225	0.225	0.147	0.147
287.4	0.325	0.327	0.275	0.275	0.225	0.225	0.147	0.147
287.6	0.325	0.327	0.275	0.275	0.226	0.225	0.147	0.147
287.8	0.326	0.327	0.276	0.275	0.227	0.225	0.147	0.147
288	0.326	0.327	0.276	0.275	0.227	0.225	0.148	0.147
288.2	0.327	0.327	0.276	0.275	0.228	0.225	0.148	0.147
288.4	0.327	0.327	0.276	0.275	0.228	0.225	0.149	0.147
288.6	0.327	0.327	0.275	0.275	0.227	0.225	0.149	0.147
288.8	0.327	0.327	0.275	0.275	0.228	0.225	0.149	0.147
289	0.327	0.327	0.275	0.275	0.228	0.225	0.149	0.147
289.2	0.326	0.327	0.274	0.275	0.227	0.225	0.149	0.147
289.4	0.327	0.327	0.274	0.275	0.227	0.225	0.149	0.147
289.6	0.327	0.327	0.274	0.275	0.227	0.225	0.149	0.147
289.8	0.327	0.327	0.274	0.275	0.226	0.225	0.148	0.147
290	0.326	0.327	0.273	0.275	0.226	0.225	0.148	0.147
290.2	0.327	0.327	0.274	0.275	0.226	0.225	0.148	0.147
290.4	0.327	0.327	0.273	0.275	0.226	0.225	0.149	0.147
290.6	0.326	0.327	0.274	0.275	0.226	0.225	0.149	0.147
290.8	0.325	0.327	0.274	0.275	0.225	0.225	0.148	0.147
291	0.325	0.327	0.274	0.275	0.225	0.225	0.149	0.147
291.2	0.325	0.327	0.275	0.275	0.225	0.225	0.148	0.147
291.4	0.325	0.327	0.275	0.275	0.225	0.225	0.148	0.147
291.6	0.325	0.327	0.275	0.275	0.225	0.225	0.148	0.147
291.8	0.325	0.327	0.276	0.275	0.226	0.225	0.148	0.147
292	0.325	0.327	0.276	0.275	0.227	0.225	0.149	0.147
292.2	0.325	0.327	0.276	0.275	0.227	0.225	0.149	0.147
292.4	0.325	0.327	0.277	0.275	0.227	0.225	0.149	0.147
292.6	0.325	0.327	0.277	0.275	0.227	0.225	0.149	0.147
292.8	0.324	0.327	0.277	0.275	0.227	0.225	0.148	0.147
293	0.325	0.327	0.277	0.275	0.226	0.225	0.148	0.148
293.2	0.325	0.327	0.276	0.275	0.226	0.225	0.148	0.148
293.4	0.325	0.327	0.277	0.275	0.227	0.225	0.147	0.148
293.6	0.324	0.327	0.276	0.275	0.226	0.225	0.147	0.148
293.8	0.325	0.327	0.277	0.275	0.226	0.225	0.147	0.148
294	0.325	0.327	0.277	0.275	0.226	0.225	0.147	0.148
294.2	0.325	0.327	0.277	0.275	0.227	0.225	0.148	0.148
294.4	0.325	0.327	0.277	0.275	0.227	0.225	0.148	0.148
294.6	0.325	0.327	0.277	0.275	0.226	0.225	0.148	0.148
294.8	0.325	0.327	0.277	0.275	0.225	0.225	0.148	0.148
295	0.325	0.327	0.277	0.275	0.226	0.225	0.148	0.148
295.2	0.325	0.327	0.276	0.275	0.226	0.225	0.148	0.148
295.4	0.325	0.327	0.276	0.275	0.225	0.225	0.148	0.148
295.6	0.325	0.327	0.276	0.275	0.225	0.225	0.148	0.148
295.8	0.325	0.327	0.276	0.275	0.225	0.225	0.148	0.148
296	0.325	0.327	0.276	0.275	0.225	0.225	0.148	0.148
296.2	0.325	0.327	0.275	0.275	0.225	0.225	0.148	0.148
296.4	0.325	0.327	0.275	0.275	0.225	0.225	0.148	0.148
296.6	0.325	0.327	0.275	0.275	0.225	0.225	0.147	0.148
296.8	0.325	0.327	0.274	0.275	0.225	0.225	0.147	0.148
297	0.325	0.327	0.274	0.275	0.225	0.225	0.147	0.148
297.2	0.325	0.327	0.273	0.275	0.225	0.225	0.146	0.148
297.4	0.325	0.327	0.273	0.275	0.225	0.225	0.146	0.148
297.6	0.325	0.327	0.273	0.275	0.224	0.225	0.146	0.148
297.8	0.325	0.327	0.274	0.275	0.225	0.225	0.147	0.148
298	0.325	0.327	0.274	0.275	0.225	0.225	0.147	0.148
298.2	0.325	0.327	0.274	0.275	0.225	0.225	0.147	0.148
298.4	0.325	0.327	0.275	0.275	0.225	0.225	0.147	0.148
298.6	0.325	0.327	0.274	0.275	0.225	0.225	0.147	0.148
298.8	0.325	0.327	0.275	0.275	0.225	0.225	0.147	0.148
299	0.325	0.327	0.275	0.275	0.225	0.225	0.147	0.148
299.2	0.325	0.327	0.275	0.275	0.225	0.225	0.147	0.148
299.4	0.324	0.327	0.275	0.275	0.224	0.225	0.147	0.148
299.6	0.324	0.327	0.275	0.275	0.224	0.225	0.147	0.148
299.8	0.324		0.275		0.224		0.147
299.999	0.324	0.327	0.275	0.275	0.224	0.225	0.147	0.148
300.199	0.323	0.326	0.274	0.274	0.224	0.225	0.147	0.147
300.399	0.322	0.325	0.274	0.274	0.224	0.224	0.147	0.147
300.599	0.32	0.324	0.273	0.273	0.223	0.224	0.147	0.147
300.799	0.318	0.323	0.273	0.273	0.223	0.223	0.146	0.146
300.999	0.316	0.322	0.272	0.272	0.222	0.223	0.146	0.146
301.199	0.314	0.322	0.271	0.272	0.221	0.223	0.145	0.146
301.399	0.312	0.321	0.27	0.271	0.221	0.222	0.144	0.145
301.599	0.309	0.32	0.268	0.271	0.22	0.222	0.144	0.145
301.799	0.307	0.319	0.267	0.27	0.218	0.221	0.143	0.145
301.999	0.305	0.318	0.265	0.269	0.218	0.221	0.143	0.145
302.199	0.302	0.317	0.264	0.269	0.216	0.221	0.142	0.144
302.399	0.3	0.317	0.262	0.268	0.215	0.22	0.141	0.144
302.599	0.298	0.316	0.261	0.268	0.214	0.22	0.141	0.144
302.799	0.297	0.315	0.26	0.267	0.212	0.219	0.141	0.143
302.999	0.295	0.314	0.258	0.267	0.211	0.219	0.14	0.143
303.199	0.294	0.313	0.257	0.266	0.211	0.219	0.14	0.143
303.399	0.293	0.313	0.255	0.266	0.209	0.218	0.139	0.142
303.599	0.292	0.312	0.254	0.265	0.209	0.218	0.139	0.142
303.799	0.291	0.311	0.253	0.265	0.208	0.217	0.139	0.142
303.999	0.289	0.31	0.252	0.264	0.207	0.217	0.138	0.142
304.199	0.287	0.309	0.25	0.264	0.206	0.217	0.138	0.141
304.399	0.285	0.309	0.249	0.263	0.205	0.216	0.137	0.141
304.599	0.284	0.308	0.248	0.263	0.204	0.216	0.136	0.141
304.799	0.283	0.307	0.246	0.262	0.203	0.215	0.135	0.14
304.999	0.281	0.306	0.245	0.262	0.203	0.215	0.134	0.14
305.199	0.278	0.306	0.244	0.261	0.202	0.215	0.133	0.14
305.399	0.276	0.305	0.243	0.261	0.201	0.214	0.133	0.14
305.599	0.274	0.304	0.241	0.26	0.2	0.214	0.132	0.139
305.799	0.272	0.303	0.241	0.26	0.2	0.213	0.131	0.139
305.999	0.27	0.302	0.239	0.259	0.199	0.213	0.131	0.139
306.199	0.269	0.302	0.239	0.259	0.198	0.213	0.13	0.138
306.399	0.267	0.301	0.238	0.258	0.197	0.212	0.13	0.138
306.599	0.266	0.3	0.238	0.258	0.197	0.212	0.129	0.138
306.799	0.265	0.299	0.237	0.257	0.196	0.212	0.128	0.138
306.999	0.263	0.299	0.236	0.257	0.196	0.211	0.127	0.137
307.199	0.263	0.298	0.236	0.256	0.196	0.211	0.127	0.137
307.399	0.262	0.297	0.235	0.256	0.195	0.21	0.127	0.137
307.599	0.262	0.296	0.235	0.255	0.195	0.21	0.128	0.136
307.799	0.261	0.296	0.234	0.255	0.195	0.21	0.127	0.136
307.999	0.259	0.295	0.232	0.254	0.194	0.209	0.127	0.136
308.199	0.258	0.294	0.231	0.254	0.193	0.209	0.126	0.136
308.399	0.257	0.293	0.23	0.253	0.192	0.208	0.125	0.135
308.599	0.257	0.293	0.23	0.253	0.192	0.208	0.126	0.135
308.799	0.256	0.292	0.229	0.252	0.192	0.208	0.125	0.135
308.999	0.255	0.291	0.227	0.252	0.191	0.207	0.125	0.134
309.199	0.253	0.29	0.226	0.251	0.189	0.207	0.124	0.134
309.399	0.252	0.29	0.225	0.251	0.189	0.207	0.124	0.134
309.599	0.251	0.289	0.224	0.25	0.188	0.206	0.124	0.134
309.799	0.251	0.288	0.223	0.25	0.188	0.206	0.123	0.133
309.999	0.249	0.287	0.222	0.249	0.187	0.205	0.122	0.133
310.199	0.249	0.287	0.222	0.249	0.187	0.205	0.122	0.133
310.399	0.248	0.286	0.221	0.248	0.186	0.205	0.122	0.132
310.599	0.246	0.285	0.22	0.248	0.185	0.204	0.12	0.132
310.799	0.245	0.284	0.219	0.247	0.184	0.204	0.12	0.132
310.999	0.243	0.284	0.218	0.247	0.184	0.204	0.12	0.132
311.199	0.243	0.283	0.218	0.246	0.183	0.203	0.12	0.131
311.399	0.242	0.282	0.217	0.246	0.183	0.203	0.12	0.131
311.599	0.24	0.282	0.216	0.245	0.183	0.203	0.119	0.131
311.799	0.238	0.281	0.215	0.245	0.182	0.202	0.118	0.131
311.999	0.237	0.28	0.214	0.244	0.181	0.202	0.118	0.13
312.199	0.236	0.279	0.214	0.244	0.181	0.201	0.118	0.13
312.399	0.236	0.279	0.214	0.244	0.181	0.201	0.117	0.13
312.599	0.235	0.278	0.213	0.243	0.181	0.201	0.118	0.129
312.799	0.234	0.277	0.212	0.243	0.18	0.2	0.117	0.129
312.999	0.233	0.277	0.211	0.242	0.179	0.2	0.117	0.129
313.199	0.232	0.276	0.21	0.242	0.178	0.2	0.117	0.129
313.399	0.231	0.275	0.21	0.241	0.178	0.199	0.117	0.128
313.599	0.231	0.275	0.21	0.241	0.177	0.199	0.117	0.128
313.799	0.23	0.274	0.209	0.24	0.176	0.199	0.116	0.128
313.999	0.229	0.273	0.208	0.24	0.176	0.198	0.116	0.128
314.199	0.228	0.272	0.208	0.239	0.175	0.198	0.116	0.127
314.399	0.227	0.272	0.208	0.239	0.174	0.197	0.115	0.127
314.599	0.226	0.271	0.207	0.238	0.173	0.197	0.115	0.127
314.799	0.225	0.27	0.206	0.238	0.173	0.197	0.114	0.127
314.999	0.224	0.27	0.206	0.237	0.172	0.196	0.114	0.126
315.199	0.223	0.269	0.205	0.237	0.172	0.196	0.114	0.126
315.399	0.222	0.268	0.204	0.237	0.172	0.196	0.113	0.126
315.599	0.22	0.268	0.204	0.236	0.171	0.195	0.112	0.125
315.799	0.219	0.267	0.203	0.236	0.17	0.195	0.112	0.125
315.999	0.219	0.266	0.203	0.235	0.17	0.195	0.112	0.125
316.199	0.219	0.266	0.203	0.235	0.171	0.194	0.112	0.125
316.399	0.218	0.265	0.202	0.234	0.17	0.194	0.111	0.124
316.599	0.217	0.264	0.201	0.234	0.17	0.194	0.111	0.124
316.799	0.216	0.264	0.2	0.233	0.169	0.193	0.11	0.124
316.999	0.216	0.263	0.2	0.233	0.169	0.193	0.11	0.124
317.199	0.215	0.262	0.199	0.232	0.168	0.192	0.11	0.123
317.399	0.215	0.262	0.198	0.232	0.168	0.192	0.11	0.123
317.599	0.215	0.261	0.198	0.232	0.167	0.192	0.11	0.123
317.799	0.215	0.26	0.197	0.231	0.167	0.191	0.11	0.123
317.999	0.214	0.26	0.197	0.231	0.167	0.191	0.11	0.122
318.199	0.214	0.259	0.196	0.23	0.167	0.191	0.11	0.122
318.399	0.213	0.258	0.196	0.23	0.166	0.19	0.11	0.122
318.599	0.212	0.258	0.195	0.229	0.166	0.19	0.11	0.122
318.799	0.211	0.257	0.194	0.229	0.165	0.19	0.11	0.121
318.999	0.21	0.256	0.194	0.228	0.165	0.189	0.11	0.121
319.199	0.21	0.256	0.193	0.228	0.164	0.189	0.11	0.121
319.399	0.209	0.255	0.192	0.228	0.164	0.189	0.109	0.121
319.599	0.208	0.254	0.192	0.227	0.163	0.188	0.109	0.12
319.799	0.207	0.254	0.191	0.227	0.163	0.188	0.109	0.12
319.999	0.207	0.253	0.191	0.226	0.163	0.188	0.109	0.12
320.199	0.206	0.252	0.19	0.226	0.163	0.187	0.108	0.12
320.399	0.204	0.252	0.189	0.225	0.162	0.187	0.107	0.119
320.599	0.204	0.251	0.188	0.225	0.162	0.187	0.106	0.119
320.799	0.203	0.25	0.188	0.224	0.161	0.186	0.106	0.119
320.999	0.202	0.25	0.187	0.224	0.16	0.186	0.105	0.119
321.199	0.201	0.249	0.186	0.224	0.16	0.186	0.105	0.118
321.399	0.201	0.248	0.187	0.223	0.16	0.185	0.105	0.118
321.599	0.201	0.248	0.187	0.223	0.159	0.185	0.105	0.118
321.799	0.201	0.247	0.187	0.222	0.159	0.185	0.105	0.118
321.999	0.201	0.247	0.187	0.222	0.159	0.184	0.105	0.117
322.199	0.201	0.246	0.186	0.221	0.159	0.184	0.105	0.117
322.399	0.2	0.245	0.187	0.221	0.159	0.184	0.105	0.117
322.599	0.2	0.245	0.186	0.221	0.159	0.183	0.105	0.117
322.799	0.199	0.244	0.186	0.22	0.159	0.183	0.105	0.116
322.999	0.199	0.243	0.187	0.22	0.158	0.183	0.105	0.116
323.199	0.199	0.243	0.186	0.219	0.158	0.182	0.105	0.116
323.399	0.198	0.242	0.185	0.219	0.158	0.182	0.104	0.116
323.599	0.197	0.242	0.186	0.218	0.158	0.182	0.104	0.115
323.799	0.197	0.241	0.185	0.218	0.158	0.181	0.104	0.115
323.999	0.196	0.24	0.185	0.218	0.157	0.181	0.104	0.115
324.199	0.194	0.24	0.184	0.217	0.156	0.181	0.103	0.115
324.399	0.192	0.239	0.182	0.217	0.155	0.18	0.102	0.114
324.599	0.191	0.239	0.181	0.216	0.154	0.18	0.102	0.114
324.799	0.19	0.238	0.181	0.216	0.153	0.18	0.101	0.114
324.999	0.189	0.237	0.18	0.215	0.153	0.179	0.101	0.114
325.199	0.189	0.237	0.18	0.215	0.153	0.179	0.101	0.114
325.399	0.189	0.236	0.18	0.215	0.153	0.179	0.102	0.113
325.599	0.189	0.236	0.179	0.214	0.153	0.178	0.102	0.113
325.799	0.189	0.235	0.178	0.214	0.153	0.178	0.101	0.113
325.999	0.188	0.234	0.178	0.213	0.153	0.178	0.101	0.113
326.199	0.188	0.234	0.177	0.213	0.153	0.177	0.101	0.112
326.399	0.187	0.233	0.177	0.213	0.152	0.177	0.101	0.112
326.599	0.187	0.233	0.177	0.212	0.152	0.177	0.101	0.112
326.799	0.187	0.232	0.176	0.212	0.152	0.176	0.1	0.112
326.999	0.186	0.231	0.176	0.211	0.151	0.176	0.1	0.111
327.199	0.186	0.231	0.176	0.211	0.151	0.176	0.1	0.111
327.399	0.186	0.23	0.176	0.21	0.15	0.175	0.1	0.111
327.599	0.186	0.23	0.175	0.21	0.15	0.175	0.1	0.111
327.799	0.185	0.229	0.174	0.21	0.149	0.175	0.099	0.11
327.999	0.184	0.228	0.174	0.209	0.148	0.175	0.099	0.11
328.199	0.183	0.228	0.174	0.209	0.147	0.174	0.098	0.11
328.399	0.182	0.227	0.173	0.208	0.146	0.174	0.098	0.11
328.599	0.182	0.227	0.173	0.208	0.146	0.174	0.098	0.11
328.799	0.182	0.226	0.174	0.208	0.147	0.173	0.098	0.109
328.999	0.182	0.226	0.174	0.207	0.147	0.173	0.099	0.109
329.199	0.182	0.225	0.174	0.207	0.147	0.173	0.099	0.109
329.399	0.181	0.224	0.174	0.206	0.147	0.172	0.099	0.109
329.599	0.181	0.224	0.173	0.206	0.147	0.172	0.099	0.108
329.799	0.18	0.223	0.171	0.206	0.146	0.172	0.098	0.108
329.999	0.179	0.223	0.171	0.205	0.146	0.171	0.098	0.108
330.199	0.178	0.222	0.17	0.205	0.146	0.171	0.098	0.108
330.399	0.178	0.222	0.17	0.204	0.145	0.171	0.097	0.108
330.599	0.178	0.221	0.169	0.204	0.145	0.17	0.097	0.107
330.799	0.177	0.22	0.168	0.204	0.144	0.17	0.096	0.107
330.999	0.176	0.22	0.167	0.203	0.143	0.17	0.095	0.107
331.199	0.176	0.219	0.166	0.203	0.143	0.17	0.095	0.107
331.399	0.176	0.219	0.165	0.202	0.142	0.169	0.094	0.106
331.599	0.175	0.218	0.164	0.202	0.142	0.169	0.094	0.106
331.799	0.174	0.218	0.164	0.202	0.141	0.169	0.093	0.106
331.999	0.173	0.217	0.164	0.201	0.14	0.168	0.093	0.106
332.199	0.172	0.216	0.163	0.201	0.141	0.168	0.093	0.106
332.399	0.171	0.216	0.163	0.2	0.14	0.168	0.093	0.105
332.599	0.171	0.215	0.163	0.2	0.141	0.167	0.093	0.105
332.799	0.171	0.215	0.163	0.2	0.141	0.167	0.093	0.105
332.999	0.17	0.214	0.163	0.199	0.14	0.167	0.093	0.105
333.199	0.17	0.214	0.164	0.199	0.14	0.167	0.093	0.104
333.399	0.17	0.213	0.164	0.199	0.139	0.166	0.093	0.104
333.599	0.169	0.213	0.163	0.198	0.139	0.166	0.093	0.104
333.799	0.169	0.212	0.162	0.198	0.139	0.166	0.092	0.104
333.999	0.169	0.212	0.162	0.197	0.139	0.165	0.092	0.104
334.199	0.169	0.211	0.163	0.197	0.139	0.165	0.093	0.103
334.399	0.169	0.21	0.163	0.197	0.139	0.165	0.092	0.103
334.599	0.168	0.21	0.162	0.196	0.139	0.164	0.091	0.103
334.799	0.168	0.209	0.162	0.196	0.139	0.164	0.09	0.103
334.999	0.168	0.209	0.162	0.195	0.139	0.164	0.09	0.102
335.199	0.168	0.208	0.161	0.195	0.139	0.164	0.09	0.102
335.399	0.168	0.208	0.16	0.195	0.138	0.163	0.09	0.102
335.599	0.167	0.207	0.16	0.194	0.138	0.163	0.09	0.102
335.799	0.167	0.207	0.16	0.194	0.138	0.163	0.09	0.102
335.999	0.167	0.206	0.159	0.194	0.138	0.162	0.09	0.101
336.199	0.166	0.206	0.159	0.193	0.137	0.162	0.09	0.101
336.399	0.165	0.205	0.158	0.193	0.136	0.162	0.09	0.101
336.599	0.164	0.205	0.158	0.192	0.136	0.161	0.089	0.101
336.799	0.164	0.204	0.157	0.192	0.136	0.161	0.089	0.101
336.999	0.164	0.204	0.156	0.192	0.135	0.161	0.089	0.1
337.199	0.163	0.203	0.156	0.191	0.134	0.161	0.089	0.1
337.399	0.162	0.203	0.156	0.191	0.133	0.16	0.089	0.1
337.599	0.162	0.202	0.155	0.191	0.133	0.16	0.088	0.1
337.799	0.161	0.202	0.155	0.19	0.133	0.16	0.088	0.1
337.999	0.162	0.201	0.155	0.19	0.133	0.159	0.089	0.099
338.199	0.161	0.201	0.154	0.189	0.132	0.159	0.088	0.099
338.399	0.161	0.2	0.154	0.189	0.132	0.159	0.088	0.099
338.599	0.16	0.2	0.154	0.189	0.132	0.159	0.088	0.099
338.799	0.16	0.199	0.153	0.188	0.132	0.158	0.088	0.098
338.999	0.16	0.198	0.153	0.188	0.132	0.158	0.088	0.098
339.199	0.16	0.198	0.153	0.188	0.132	0.158	0.088	0.098
339.399	0.159	0.197	0.153	0.187	0.132	0.157	0.087	0.098
339.599	0.159	0.197	0.153	0.187	0.132	0.157	0.087	0.098
339.799	0.159	0.196	0.153	0.187	0.132	0.157	0.087	0.097
339.999	0.158	0.196	0.152	0.186	0.132	0.157	0.087	0.097
340.199	0.157	0.195	0.152	0.186	0.132	0.156	0.086	0.097
340.399	0.157	0.195	0.152	0.185	0.131	0.156	0.085	0.097
340.599	0.156	0.194	0.152	0.185	0.131	0.156	0.085	0.097
340.799	0.156	0.194	0.152	0.185	0.132	0.155	0.085	0.096
340.999	0.156	0.193	0.151	0.184	0.131	0.155	0.084	0.096
341.199	0.156	0.193	0.152	0.184	0.131	0.155	0.084	0.096
341.399	0.155	0.193	0.151	0.184	0.13	0.155	0.084	0.096
341.599	0.155	0.192	0.151	0.183	0.129	0.154	0.084	0.096
341.799	0.155	0.192	0.15	0.183	0.129	0.154	0.084	0.095
341.999	0.155	0.191	0.149	0.183	0.129	0.154	0.083	0.095
342.199	0.154	0.191	0.149	0.182	0.128	0.153	0.083	0.095
342.399	0.153	0.19	0.149	0.182	0.128	0.153	0.083	0.095
342.599	0.153	0.19	0.148	0.182	0.128	0.153	0.083	0.095
342.799	0.153	0.189	0.148	0.181	0.128	0.153	0.083	0.094
342.999	0.153	0.189	0.147	0.181	0.128	0.152	0.083	0.094
343.199	0.152	0.188	0.147	0.18	0.128	0.152	0.083	0.094
343.399	0.152	0.188	0.147	0.18	0.128	0.152	0.083	0.094
343.599	0.152	0.187	0.147	0.18	0.128	0.152	0.083	0.094
343.799	0.151	0.187	0.146	0.179	0.127	0.151	0.082	0.093
343.999	0.15	0.186	0.145	0.179	0.127	0.151	0.082	0.093
344.199	0.151	0.186	0.145	0.179	0.127	0.151	0.082	0.093
344.399	0.151	0.185	0.145	0.178	0.127	0.15	0.082	0.093
344.599	0.15	0.185	0.145	0.178	0.127	0.15	0.082	0.093
344.799	0.15	0.184	0.145	0.178	0.127	0.15	0.082	0.093
344.999	0.149	0.184	0.144	0.177	0.126	0.15	0.082	0.092
345.199	0.149	0.183	0.144	0.177	0.125	0.149	0.082	0.092
345.399	0.148	0.183	0.144	0.177	0.125	0.149	0.082	0.092
345.599	0.147	0.182	0.144	0.176	0.125	0.149	0.082	0.092
345.799	0.147	0.182	0.143	0.176	0.125	0.149	0.081	0.092
345.999	0.147	0.182	0.144	0.176	0.124	0.148	0.081	0.091
346.199	0.146	0.181	0.144	0.175	0.124	0.148	0.081	0.091
346.399	0.145	0.181	0.144	0.175	0.123	0.148	0.081	0.091
346.599	0.145	0.18	0.143	0.175	0.123	0.147	0.081	0.091
346.799	0.145	0.18	0.142	0.174	0.123	0.147	0.081	0.091
346.999	0.145	0.179	0.142	0.174	0.122	0.147	0.08	0.09
347.199	0.145	0.179	0.142	0.174	0.122	0.147	0.08	0.09
347.399	0.144	0.178	0.141	0.173	0.122	0.146	0.08	0.09
347.599	0.143	0.178	0.141	0.173	0.122	0.146	0.08	0.09
347.799	0.143	0.177	0.14	0.173	0.122	0.146	0.08	0.09
347.999	0.144	0.177	0.14	0.172	0.123	0.146	0.08	0.089
348.199	0.143	0.177	0.139	0.172	0.122	0.145	0.079	0.089
348.399	0.143	0.176	0.139	0.172	0.122	0.145	0.08	0.089
348.599	0.143	0.176	0.139	0.171	0.121	0.145	0.08	0.089
348.799	0.143	0.175	0.138	0.171	0.121	0.145	0.08	0.089
348.999	0.143	0.175	0.138	0.171	0.121	0.144	0.08	0.089
349.199	0.143	0.174	0.138	0.17	0.121	0.144	0.08	0.088
349.399	0.143	0.174	0.138	0.17	0.121	0.144	0.08	0.088
349.599	0.143	0.173	0.138	0.17	0.121	0.144	0.08	0.088
349.799	0.143	0.173	0.138	0.169	0.121	0.143	0.08	0.088
349.999	0.143	0.172	0.138	0.169	0.121	0.143	0.08	0.088
350.199	0.142	0.172	0.138	0.169	0.121	0.143	0.079	0.087
350.399	0.141	0.172	0.138	0.168	0.121	0.142	0.079	0.087
350.599	0.141	0.171	0.138	0.168	0.121	0.142	0.079	0.087
350.799	0.141	0.171	0.137	0.168	0.12	0.142	0.079	0.087
350.999	0.14	0.17	0.137	0.167	0.12	0.142	0.078	0.087
351.199	0.14	0.17	0.137	0.167	0.119	0.141	0.078	0.087
351.399	0.139	0.169	0.136	0.167	0.119	0.141	0.077	0.086
351.599	0.139	0.169	0.136	0.166	0.119	0.141	0.076	0.086
351.799	0.138	0.169	0.135	0.166	0.119	0.141	0.076	0.086
351.999	0.137	0.168	0.135	0.166	0.118	0.14	0.075	0.086
352.199	0.136	0.168	0.135	0.165	0.117	0.14	0.075	0.086
352.399	0.136	0.167	0.135	0.165	0.117	0.14	0.075	0.085
352.599	0.137	0.167	0.135	0.165	0.116	0.14	0.074	0.085
352.799	0.137	0.166	0.135	0.164	0.116	0.139	0.074	0.085
352.999	0.136	0.166	0.134	0.164	0.116	0.139	0.074	0.085
353.199	0.136	0.166	0.134	0.164	0.115	0.139	0.074	0.085
353.399	0.136	0.165	0.134	0.163	0.115	0.139	0.074	0.085
353.599	0.136	0.165	0.135	0.163	0.116	0.138	0.075	0.084
353.799	0.135	0.164	0.134	0.163	0.116	0.138	0.075	0.084
353.999	0.135	0.164	0.134	0.162	0.116	0.138	0.075	0.084
354.199	0.134	0.163	0.134	0.162	0.115	0.138	0.075	0.084
354.399	0.134	0.163	0.133	0.162	0.115	0.137	0.075	0.084
354.599	0.134	0.163	0.133	0.162	0.115	0.137	0.076	0.084
354.799	0.133	0.162	0.133	0.161	0.114	0.137	0.075	0.083
354.999	0.133	0.162	0.133	0.161	0.114	0.137	0.075	0.083
355.199	0.133	0.161	0.133	0.161	0.114	0.136	0.075	0.083
355.399	0.133	0.161	0.132	0.16	0.114	0.136	0.075	0.083
355.599	0.133	0.161	0.132	0.16	0.114	0.136	0.075	0.083
355.799	0.133	0.16	0.132	0.16	0.114	0.136	0.075	0.082
355.999	0.132	0.16	0.132	0.159	0.114	0.135	0.075	0.082
356.199	0.133	0.159	0.132	0.159	0.114	0.135	0.074	0.082
356.399	0.133	0.159	0.132	0.159	0.113	0.135	0.074	0.082
356.599	0.132	0.159	0.132	0.158	0.113	0.135	0.074	0.082
356.799	0.132	0.158	0.132	0.158	0.114	0.134	0.075	0.082
356.999	0.132	0.158	0.133	0.158	0.114	0.134	0.075	0.081
357.199	0.131	0.157	0.133	0.157	0.115	0.134	0.075	0.081
357.399	0.13	0.157	0.132	0.157	0.114	0.134	0.074	0.081
357.599	0.129	0.157	0.131	0.157	0.114	0.133	0.073	0.081
357.799	0.129	0.156	0.13	0.157	0.113	0.133	0.072	0.081
357.999	0.128	0.156	0.13	0.156	0.113	0.133	0.073	0.081
358.199	0.128	0.155	0.13	0.156	0.112	0.133	0.072	0.08
358.399	0.128	0.155	0.129	0.156	0.112	0.133	0.072	0.08
358.599	0.128	0.155	0.129	0.155	0.112	0.132	0.072	0.08
358.799	0.127	0.154	0.128	0.155	0.111	0.132	0.071	0.08
358.999	0.128	0.154	0.128	0.155	0.111	0.132	0.071	0.08
359.199	0.127	0.153	0.127	0.154	0.11	0.132	0.071	0.08
359.399	0.128	0.153	0.126	0.154	0.11	0.131	0.071	0.079
359.599	0.127	0.153	0.126	0.154	0.11	0.131	0.07	0.079
359.799	0.128	0.152	0.126	0.154	0.109	0.131	0.07	0.079
359.999	0.128	0.152	0.125	0.153	0.109	0.131	0.07	0.079
360.199	0.128	0.151	0.125	0.153	0.109	0.13	0.071	0.079
360.399	0.128	0.151	0.125	0.153	0.109	0.13	0.071	0.079
360.599	0.128	0.151	0.126	0.152	0.109	0.13	0.071	0.078
360.799	0.128	0.15	0.126	0.152	0.11	0.13	0.072	0.078
360.999	0.127	0.15	0.125	0.152	0.109	0.129	0.071	0.078
361.199	0.127	0.15	0.125	0.151	0.11	0.129	0.071	0.078
361.399	0.126	0.149	0.124	0.151	0.109	0.129	0.07	0.078
361.599	0.126	0.149	0.125	0.151	0.109	0.129	0.07	0.078
361.799	0.126	0.148	0.125	0.151	0.109	0.128	0.071	0.077
361.999	0.126	0.148	0.125	0.15	0.11	0.128	0.071	0.077
362.199	0.125	0.148	0.124	0.15	0.109	0.128	0.07	0.077
362.399	0.125	0.147	0.124	0.15	0.109	0.128	0.07	0.077
362.599	0.124	0.147	0.124	0.149	0.108	0.128	0.069	0.077
362.799	0.124	0.146	0.123	0.149	0.108	0.127	0.069	0.077
362.999	0.124	0.146	0.123	0.149	0.108	0.127	0.069	0.077
363.199	0.124	0.146	0.123	0.149	0.108	0.127	0.069	0.076
363.399	0.124	0.145	0.122	0.148	0.107	0.127	0.068	0.076
363.599	0.123	0.145	0.122	0.148	0.107	0.126	0.068	0.076
363.799	0.123	0.145	0.122	0.148	0.106	0.126	0.068	0.076
363.999	0.123	0.144	0.122	0.147	0.106	0.126	0.068	0.076
364.199	0.123	0.144	0.122	0.147	0.106	0.126	0.068	0.076
364.399	0.123	0.144	0.122	0.147	0.106	0.125	0.068	0.075
364.599	0.122	0.143	0.122	0.147	0.106	0.125	0.068	0.075
364.799	0.122	0.143	0.122	0.146	0.106	0.125	0.067	0.075
364.999	0.121	0.142	0.12	0.146	0.106	0.125	0.067	0.075
365.199	0.121	0.142	0.12	0.146	0.106	0.125	0.067	0.075
365.399	0.121	0.142	0.12	0.145	0.106	0.124	0.067	0.075
365.599	0.12	0.141	0.12	0.145	0.105	0.124	0.067	0.074
365.799	0.12	0.141	0.12	0.145	0.105	0.124	0.066	0.074
365.999	0.119	0.141	0.12	0.145	0.105	0.124	0.066	0.074
366.199	0.119	0.14	0.12	0.144	0.104	0.123	0.066	0.074
366.399	0.118	0.14	0.119	0.144	0.104	0.123	0.066	0.074
366.599	0.118	0.14	0.119	0.144	0.103	0.123	0.066	0.074
366.799	0.118	0.139	0.119	0.143	0.103	0.123	0.065	0.074
366.999	0.118	0.139	0.119	0.143	0.103	0.123	0.065	0.073
367.199	0.117	0.138	0.119	0.143	0.103	0.122	0.065	0.073
367.399	0.117	0.138	0.118	0.143	0.102	0.122	0.065	0.073
367.599	0.117	0.138	0.119	0.142	0.102	0.122	0.065	0.073
367.799	0.117	0.137	0.119	0.142	0.103	0.122	0.065	0.073
367.999	0.118	0.137	0.119	0.142	0.104	0.121	0.066	0.073
368.199	0.117	0.137	0.119	0.141	0.104	0.121	0.066	0.072
368.399	0.117	0.136	0.119	0.141	0.104	0.121	0.066	0.072
368.599	0.117	0.136	0.118	0.141	0.104	0.121	0.066	0.072
368.799	0.116	0.136	0.118	0.141	0.104	0.121	0.065	0.072
368.999	0.116	0.135	0.117	0.14	0.104	0.12	0.065	0.072
369.199	0.116	0.135	0.117	0.14	0.103	0.12	0.065	0.072
369.399	0.116	0.135	0.117	0.14	0.103	0.12	0.065	0.072
369.599	0.116	0.134	0.117	0.14	0.103	0.12	0.065	0.071
369.799	0.116	0.134	0.117	0.139	0.103	0.12	0.066	0.071
369.999	0.116	0.134	0.116	0.139	0.103	0.119	0.066	0.071
370.199	0.116	0.133	0.115	0.139	0.102	0.119	0.066	0.071
370.399	0.115	0.133	0.115	0.139	0.102	0.119	0.065	0.071
370.599	0.115	0.133	0.115	0.138	0.102	0.119	0.065	0.071
370.799	0.116	0.132	0.115	0.138	0.101	0.118	0.065	0.071
370.999	0.115	0.132	0.115	0.138	0.101	0.118	0.064	0.07
371.199	0.115	0.132	0.115	0.137	0.1	0.118	0.063	0.07
371.399	0.114	0.131	0.114	0.137	0.1	0.118	0.063	0.07
371.599	0.115	0.131	0.115	0.137	0.101	0.118	0.063	0.07
371.799	0.115	0.131	0.115	0.137	0.1	0.117	0.063	0.07
371.999	0.115	0.13	0.115	0.136	0.1	0.117	0.063	0.07
372.199	0.114	0.13	0.115	0.136	0.1	0.117	0.062	0.07
372.399	0.114	0.13	0.115	0.136	0.1	0.117	0.062	0.069
372.599	0.114	0.129	0.114	0.136	0.099	0.117	0.061	0.069
372.799	0.114	0.129	0.114	0.135	0.099	0.116	0.061	0.069
372.999	0.114	0.129	0.114	0.135	0.098	0.116	0.061	0.069
373.199	0.113	0.128	0.114	0.135	0.098	0.116	0.061	0.069
373.399	0.113	0.128	0.114	0.135	0.097	0.116	0.061	0.069
373.599	0.113	0.128	0.114	0.134	0.098	0.115	0.061	0.069
373.799	0.112	0.127	0.114	0.134	0.098	0.115	0.061	0.068
373.999	0.112	0.127	0.113	0.134	0.097	0.115	0.061	0.068
374.199	0.112	0.127	0.113	0.133	0.097	0.115	0.061	0.068
374.399	0.112	0.126	0.113	0.133	0.097	0.115	0.061	0.068
374.599	0.112	0.126	0.113	0.133	0.097	0.114	0.061	0.068
374.799	0.111	0.126	0.112	0.133	0.097	0.114	0.061	0.068
374.999	0.111	0.125	0.112	0.132	0.097	0.114	0.061	0.068
375.199	0.11	0.125	0.112	0.132	0.097	0.114	0.061	0.067
375.399	0.11	0.125	0.112	0.132	0.097	0.114	0.061	0.067
375.599	0.11	0.124	0.112	0.132	0.097	0.113	0.061	0.067
375.799	0.11	0.124	0.112	0.131	0.097	0.113	0.061	0.067
375.999	0.11	0.124	0.111	0.131	0.097	0.113	0.061	0.067
376.199	0.11	0.123	0.111	0.131	0.097	0.113	0.061	0.067
376.399	0.11	0.123	0.111	0.131	0.096	0.113	0.061	0.067
376.599	0.11	0.123	0.11	0.13	0.096	0.112	0.061	0.066
376.799	0.11	0.123	0.11	0.13	0.096	0.112	0.061	0.066
376.999	0.11	0.122	0.11	0.13	0.096	0.112	0.061	0.066
377.199	0.11	0.122	0.11	0.13	0.096	0.112	0.06	0.066
377.399	0.109	0.122	0.111	0.129	0.096	0.112	0.06	0.066
377.599	0.109	0.121	0.111	0.129	0.095	0.111	0.06	0.066
377.799	0.108	0.121	0.11	0.129	0.095	0.111	0.06	0.066
377.999	0.108	0.121	0.11	0.129	0.094	0.111	0.059	0.065
378.199	0.108	0.12	0.11	0.128	0.094	0.111	0.059	0.065
378.399	0.107	0.12	0.109	0.128	0.094	0.111	0.059	0.065
378.599	0.107	0.12	0.11	0.128	0.094	0.11	0.059	0.065
378.799	0.106	0.119	0.109	0.128	0.093	0.11	0.059	0.065
378.999	0.106	0.119	0.109	0.127	0.093	0.11	0.058	0.065
379.199	0.105	0.119	0.109	0.127	0.092	0.11	0.058	0.065
379.399	0.105	0.119	0.109	0.127	0.093	0.11	0.058	0.064
379.599	0.105	0.118	0.109	0.127	0.093	0.109	0.058	0.064
379.799	0.105	0.118	0.109	0.126	0.093	0.109	0.059	0.064
379.999	0.105	0.118	0.109	0.126	0.093	0.109	0.059	0.064
380.199	0.105	0.117	0.109	0.126	0.094	0.109	0.059	0.064
380.399	0.105	0.117	0.108	0.126	0.094	0.109	0.059	0.064
380.599	0.106	0.117	0.108	0.125	0.094	0.108	0.06	0.064
380.799	0.106	0.116	0.108	0.125	0.095	0.108	0.06	0.064
380.999	0.106	0.116	0.108	0.125	0.095	0.108	0.059	0.063
381.199	0.106	0.116	0.108	0.125	0.094	0.108	0.059	0.063
381.399	0.105	0.116	0.108	0.124	0.094	0.108	0.059	0.063
381.599	0.105	0.115	0.108	0.124	0.094	0.107	0.059	0.063
381.799	0.104	0.115	0.108	0.124	0.095	0.107	0.058	0.063
381.999	0.104	0.115	0.107	0.124	0.094	0.107	0.058	0.063
382.199	0.104	0.114	0.107	0.123	0.094	0.107	0.058	0.063
382.399	0.104	0.114	0.108	0.123	0.093	0.107	0.058	0.063
382.599	0.103	0.114	0.107	0.123	0.093	0.106	0.058	0.062
382.799	0.103	0.113	0.107	0.123	0.093	0.106	0.058	0.062
382.999	0.103	0.113	0.106	0.123	0.093	0.106	0.058	0.062
383.199	0.102	0.113	0.106	0.122	0.092	0.106	0.058	0.062
383.399	0.102	0.113	0.106	0.122	0.092	0.106	0.058	0.062
383.599	0.102	0.112	0.106	0.122	0.091	0.105	0.058	0.062
383.799	0.102	0.112	0.105	0.122	0.091	0.105	0.058	0.062
383.999	0.101	0.112	0.105	0.121	0.09	0.105	0.057	0.061
384.199	0.101	0.111	0.104	0.121	0.089	0.105	0.057	0.061
384.399	0.102	0.111	0.103	0.121	0.089	0.105	0.057	0.061
384.599	0.102	0.111	0.104	0.121	0.089	0.105	0.057	0.061
384.799	0.102	0.111	0.103	0.12	0.089	0.104	0.056	0.061
384.999	0.102	0.11	0.103	0.12	0.089	0.104	0.056	0.061
385.199	0.101	0.11	0.103	0.12	0.089	0.104	0.055	0.061
385.399	0.102	0.11	0.104	0.12	0.089	0.104	0.055	0.061
385.599	0.102	0.11	0.103	0.119	0.089	0.104	0.055	0.06
385.799	0.102	0.109	0.104	0.119	0.089	0.103	0.054	0.06
385.999	0.101	0.109	0.104	0.119	0.088	0.103	0.054	0.06
386.199	0.101	0.109	0.104	0.119	0.089	0.103	0.055	0.06
386.399	0.101	0.108	0.104	0.119	0.089	0.103	0.055	0.06
386.599	0.101	0.108	0.104	0.118	0.089	0.103	0.055	0.06
386.799	0.1	0.108	0.104	0.118	0.089	0.102	0.055	0.06
386.999	0.1	0.108	0.103	0.118	0.089	0.102	0.055	0.06
387.199	0.099	0.107	0.102	0.118	0.088	0.102	0.055	0.059
387.399	0.099	0.107	0.102	0.117	0.088	0.102	0.056	0.059
387.599	0.098	0.107	0.102	0.117	0.088	0.102	0.056	0.059
387.799	0.098	0.106	0.102	0.117	0.087	0.102	0.056	0.059
387.999	0.097	0.106	0.101	0.117	0.087	0.101	0.056	0.059
388.199	0.097	0.106	0.101	0.116	0.087	0.101	0.056	0.059
388.399	0.097	0.106	0.101	0.116	0.087	0.101	0.056	0.059
388.599	0.097	0.105	0.101	0.116	0.088	0.101	0.056	0.059
388.799	0.097	0.105	0.1	0.116	0.088	0.101	0.056	0.058
388.999	0.097	0.105	0.101	0.116	0.088	0.1	0.055	0.058
389.199	0.097	0.105	0.101	0.115	0.088	0.1	0.056	0.058
389.399	0.098	0.104	0.101	0.115	0.088	0.1	0.055	0.058
389.599	0.098	0.104	0.101	0.115	0.088	0.1	0.055	0.058
389.799	0.097	0.104	0.101	0.115	0.088	0.1	0.055	0.058
389.999	0.097	0.104	0.1	0.114	0.087	0.1	0.054	0.058
390.199	0.097	0.103	0.099	0.114	0.087	0.099	0.054	0.058
390.399	0.097	0.103	0.099	0.114	0.087	0.099	0.053	0.058
390.599	0.097	0.103	0.099	0.114	0.086	0.099	0.053	0.057
390.799	0.096	0.102	0.099	0.114	0.085	0.099	0.053	0.057
390.999	0.096	0.102	0.099	0.113	0.085	0.099	0.054	0.057
391.199	0.096	0.102	0.099	0.113	0.085	0.098	0.054	0.057
391.399	0.096	0.102	0.099	0.113	0.085	0.098	0.054	0.057
391.599	0.095	0.101	0.1	0.113	0.085	0.098	0.054	0.057
391.799	0.095	0.101	0.1	0.112	0.085	0.098	0.054	0.057
391.999	0.094	0.101	0.099	0.112	0.085	0.098	0.054	0.057
392.199	0.094	0.101	0.099	0.112	0.085	0.098	0.053	0.056
392.399	0.094	0.1	0.098	0.112	0.085	0.097	0.053	0.056
392.599	0.095	0.1	0.099	0.112	0.085	0.097	0.053	0.056
392.799	0.095	0.1	0.099	0.111	0.085	0.097	0.053	0.056
392.999	0.095	0.1	0.098	0.111	0.086	0.097	0.053	0.056
393.199	0.095	0.099	0.098	0.111	0.086	0.097	0.053	0.056
393.399	0.095	0.099	0.098	0.111	0.086	0.096	0.052	0.056
393.599	0.095	0.099	0.098	0.111	0.086	0.096	0.053	0.056
393.799	0.095	0.099	0.097	0.11	0.086	0.096	0.052	0.056
393.999	0.095	0.098	0.097	0.11	0.085	0.096	0.052	0.055
394.199	0.094	0.098	0.097	0.11	0.086	0.096	0.052	0.055
394.399	0.094	0.098	0.097	0.11	0.085	0.096	0.051	0.055
394.599	0.094	0.098	0.097	0.109	0.084	0.095	0.051	0.055
394.799	0.093	0.097	0.097	0.109	0.084	0.095	0.051	0.055
394.999	0.092	0.097	0.096	0.109	0.083	0.095	0.051	0.055
395.199	0.091	0.097	0.096	0.109	0.083	0.095	0.05	0.055
395.399	0.092	0.097	0.097	0.109	0.083	0.095	0.05	0.055
395.599	0.092	0.096	0.097	0.108	0.083	0.095	0.05	0.054
395.799	0.092	0.096	0.096	0.108	0.083	0.094	0.05	0.054
395.999	0.091	0.096	0.095	0.108	0.082	0.094	0.05	0.054
396.199	0.092	0.096	0.096	0.108	0.082	0.094	0.05	0.054
396.399	0.092	0.095	0.096	0.108	0.083	0.094	0.05	0.054
396.599	0.092	0.095	0.096	0.107	0.083	0.094	0.05	0.054
396.799	0.092	0.095	0.096	0.107	0.083	0.094	0.05	0.054
396.999	0.093	0.095	0.095	0.107	0.083	0.093	0.051	0.054
397.199	0.093	0.094	0.095	0.107	0.084	0.093	0.051	0.054
397.399	0.094	0.094	0.096	0.106	0.084	0.093	0.051	0.053
397.599	0.094	0.094	0.096	0.106	0.084	0.093	0.051	0.053
397.799	0.095	0.094	0.096	0.106	0.085	0.093	0.051	0.053
397.999	0.095	0.093	0.096	0.106	0.085	0.093	0.052	0.053
398.199	0.095	0.093	0.095	0.106	0.084	0.092	0.052	0.053
398.399	0.095	0.093	0.095	0.105	0.084	0.092	0.051	0.053
398.599	0.094	0.093	0.095	0.105	0.084	0.092	0.051	0.053
398.799	0.093	0.093	0.094	0.105	0.083	0.092	0.051	0.053
398.999	0.092	0.092	0.094	0.105	0.083	0.092	0.05	0.053
399.199	0.092	0.092	0.093	0.105	0.083	0.092	0.05	0.052
399.399	0.091	0.092	0.094	0.104	0.082	0.091	0.05	0.052
[truncated: 1,002 more rows]

## Sheet: Fig1b
BLI sensorgrams for Fig.1b Nb8 binds to FZD6
time (s)	response(nm) 2000 nM	fit	response(nm) 1000 nM	fit	response(nm) 500 nM	fit	response(nm) 250 nM	fit
0	0.057	0	0.034	0	0.015	0	0.01	0
0.2	0.066	0.032	0.038	0.016	0.017	0.007	0.011	0.003
0.4	0.076	0.058	0.043	0.029	0.019	0.014	0.012	0.007
0.6	0.087	0.08	0.049	0.041	0.022	0.019	0.013	0.009
0.8	0.099	0.098	0.055	0.051	0.026	0.024	0.015	0.012
1	0.111	0.113	0.061	0.06	0.029	0.029	0.016	0.014
1.2	0.122	0.125	0.067	0.067	0.032	0.033	0.018	0.017
1.4	0.133	0.135	0.073	0.074	0.036	0.037	0.019	0.019
1.6	0.142	0.143	0.078	0.079	0.039	0.04	0.02	0.02
1.8	0.15	0.15	0.083	0.084	0.041	0.043	0.022	0.022
2	0.157	0.156	0.087	0.088	0.044	0.046	0.024	0.024
2.2	0.161	0.161	0.091	0.091	0.046	0.048	0.025	0.025
2.4	0.165	0.164	0.094	0.094	0.049	0.05	0.026	0.026
2.6	0.169	0.168	0.095	0.097	0.051	0.052	0.027	0.027
2.8	0.171	0.17	0.098	0.099	0.053	0.054	0.027	0.029
3	0.173	0.173	0.099	0.101	0.055	0.055	0.028	0.03
3.2	0.175	0.174	0.102	0.102	0.056	0.057	0.029	0.03
3.4	0.175	0.176	0.103	0.104	0.057	0.058	0.03	0.031
3.6	0.177	0.177	0.105	0.105	0.059	0.059	0.03	0.032
3.8	0.178	0.178	0.106	0.106	0.06	0.06	0.031	0.033
4	0.18	0.179	0.107	0.107	0.061	0.061	0.032	0.033
4.2	0.181	0.18	0.108	0.108	0.063	0.061	0.034	0.034
4.4	0.181	0.18	0.109	0.108	0.064	0.062	0.034	0.034
4.6	0.183	0.181	0.11	0.109	0.065	0.063	0.035	0.035
4.8	0.185	0.181	0.111	0.109	0.067	0.063	0.036	0.035
5	0.185	0.181	0.111	0.11	0.067	0.064	0.037	0.036
5.2	0.185	0.182	0.111	0.11	0.068	0.064	0.037	0.036
5.4	0.185	0.182	0.112	0.11	0.068	0.065	0.037	0.036
5.6	0.184	0.182	0.112	0.111	0.068	0.065	0.038	0.037
5.8	0.184	0.182	0.113	0.111	0.068	0.065	0.038	0.037
6	0.185	0.182	0.113	0.111	0.068	0.066	0.039	0.037
6.2	0.185	0.182	0.113	0.111	0.068	0.066	0.038	0.037
6.4	0.185	0.183	0.113	0.111	0.068	0.066	0.038	0.038
6.6	0.184	0.183	0.113	0.112	0.066	0.066	0.038	0.038
6.8	0.184	0.183	0.114	0.112	0.067	0.066	0.038	0.038
7	0.183	0.183	0.114	0.112	0.065	0.067	0.037	0.038
7.2	0.182	0.183	0.113	0.112	0.065	0.067	0.038	0.038
7.4	0.181	0.183	0.113	0.112	0.065	0.067	0.038	0.038
7.6	0.182	0.183	0.113	0.112	0.065	0.067	0.037	0.038
7.8	0.182	0.183	0.113	0.112	0.065	0.067	0.037	0.039
8	0.182	0.183	0.113	0.112	0.065	0.067	0.037	0.039
8.2	0.182	0.183	0.112	0.112	0.065	0.067	0.037	0.039
8.4	0.182	0.183	0.112	0.112	0.065	0.067	0.036	0.039
8.6	0.184	0.183	0.111	0.112	0.066	0.067	0.037	0.039
8.8	0.184	0.183	0.111	0.112	0.066	0.068	0.037	0.039
9	0.184	0.183	0.111	0.112	0.067	0.068	0.037	0.039
9.2	0.184	0.183	0.111	0.112	0.067	0.068	0.037	0.039
9.4	0.184	0.183	0.111	0.112	0.068	0.068	0.038	0.039
9.6	0.183	0.183	0.112	0.112	0.068	0.068	0.038	0.039
9.8	0.183	0.183	0.112	0.112	0.068	0.068	0.038	0.039
10	0.184	0.183	0.112	0.112	0.067	0.068	0.038	0.039
10.2	0.184	0.183	0.113	0.112	0.068	0.068	0.038	0.039
10.4	0.184	0.183	0.112	0.112	0.068	0.068	0.039	0.039
10.6	0.184	0.183	0.113	0.112	0.068	0.068	0.039	0.039
10.8	0.185	0.183	0.113	0.112	0.069	0.068	0.039	0.039
11	0.184	0.183	0.112	0.112	0.068	0.068	0.039	0.039
11.2	0.184	0.183	0.113	0.112	0.068	0.068	0.04	0.039
11.4	0.184	0.183	0.114	0.112	0.069	0.068	0.04	0.039
11.6	0.184	0.183	0.114	0.112	0.068	0.068	0.04	0.039
11.8	0.184	0.183	0.114	0.112	0.068	0.068	0.04	0.039
12	0.184	0.183	0.114	0.112	0.067	0.068	0.041	0.039
12.2	0.184	0.183	0.114	0.112	0.067	0.068	0.041	0.04
12.4	0.184	0.183	0.114	0.112	0.068	0.068	0.041	0.04
12.6	0.184	0.183	0.114	0.112	0.068	0.068	0.041	0.04
12.8	0.183	0.183	0.113	0.112	0.068	0.068	0.041	0.04
13	0.182	0.183	0.113	0.112	0.068	0.068	0.041	0.04
13.2	0.183	0.183	0.113	0.112	0.068	0.068	0.041	0.04
13.4	0.182	0.183	0.112	0.112	0.068	0.068	0.041	0.04
13.6	0.181	0.183	0.112	0.112	0.067	0.068	0.04	0.04
13.8	0.182	0.183	0.112	0.112	0.068	0.068	0.04	0.04
14	0.182	0.183	0.112	0.112	0.068	0.068	0.04	0.04
14.2	0.182	0.183	0.111	0.112	0.069	0.068	0.04	0.04
14.4	0.183	0.183	0.111	0.112	0.069	0.068	0.04	0.04
14.6	0.183	0.183	0.111	0.112	0.069	0.068	0.04	0.04
14.8	0.183	0.183	0.111	0.112	0.068	0.068	0.04	0.04
15	0.183	0.183	0.112	0.112	0.069	0.068	0.04	0.04
15.2	0.185	0.183	0.114	0.112	0.069	0.068	0.04	0.04
15.4	0.186	0.183	0.115	0.112	0.069	0.068	0.04	0.04
15.6	0.186	0.183	0.115	0.112	0.069	0.068	0.04	0.04
15.8	0.187	0.183	0.116	0.112	0.069	0.068	0.04	0.04
16	0.187	0.183	0.117	0.112	0.069	0.068	0.041	0.04
16.2	0.185	0.183	0.117	0.112	0.069	0.068	0.041	0.04
16.4	0.184	0.183	0.116	0.112	0.069	0.068	0.041	0.04
16.6	0.184	0.183	0.116	0.112	0.068	0.068	0.041	0.04
16.8	0.183	0.183	0.116	0.112	0.068	0.068	0.041	0.04
17	0.183	0.183	0.116	0.112	0.067	0.068	0.04	0.04
17.2	0.184	0.183	0.116	0.112	0.068	0.068	0.04	0.04
17.4	0.183	0.183	0.115	0.112	0.068	0.068	0.04	0.04
17.6	0.183	0.183	0.114	0.112	0.068	0.068	0.04	0.04
17.8	0.183	0.183	0.115	0.112	0.069	0.068	0.04	0.04
18	0.183	0.183	0.114	0.112	0.068	0.068	0.04	0.04
18.2	0.183	0.183	0.113	0.112	0.068	0.068	0.04	0.04
18.4	0.183	0.183	0.113	0.112	0.068	0.068	0.039	0.04
18.6	0.182	0.183	0.112	0.112	0.067	0.068	0.038	0.04
18.8	0.182	0.183	0.112	0.112	0.067	0.068	0.037	0.04
19	0.184	0.183	0.112	0.112	0.068	0.068	0.037	0.04
19.2	0.184	0.183	0.112	0.112	0.068	0.068	0.037	0.04
19.4	0.185	0.183	0.112	0.112	0.068	0.068	0.038	0.04
19.6	0.185	0.183	0.113	0.112	0.068	0.068	0.039	0.04
19.8	0.186	0.183	0.113	0.112	0.068	0.068	0.039	0.04
20	0.185	0.183	0.113	0.112	0.068	0.068	0.04	0.04
20.2	0.185	0.183	0.113	0.112	0.068	0.068	0.04	0.04
20.4	0.185	0.183	0.112	0.112	0.069	0.068	0.04	0.04
20.6	0.186	0.183	0.112	0.112	0.069	0.068	0.04	0.04
20.8	0.186	0.183	0.112	0.112	0.069	0.068	0.041	0.04
21	0.186	0.183	0.112	0.112	0.07	0.068	0.041	0.04
21.2	0.187	0.183	0.113	0.112	0.07	0.068	0.041	0.04
21.4	0.187	0.183	0.113	0.112	0.07	0.068	0.041	0.04
21.6	0.187	0.183	0.114	0.112	0.071	0.068	0.041	0.04
21.8	0.187	0.183	0.114	0.112	0.07	0.068	0.041	0.04
22	0.186	0.183	0.114	0.112	0.069	0.068	0.04	0.04
22.2	0.186	0.183	0.114	0.112	0.069	0.068	0.04	0.04
22.4	0.186	0.183	0.114	0.112	0.069	0.068	0.04	0.04
22.6	0.185	0.183	0.114	0.112	0.068	0.068	0.04	0.04
22.8	0.185	0.183	0.114	0.112	0.067	0.068	0.04	0.04
23	0.185	0.183	0.114	0.112	0.068	0.068	0.04	0.04
23.2	0.186	0.183	0.114	0.112	0.068	0.068	0.041	0.04
23.4	0.185	0.183	0.114	0.112	0.068	0.068	0.041	0.04
23.6	0.185	0.183	0.114	0.112	0.067	0.068	0.042	0.04
23.8	0.184	0.183	0.113	0.112	0.067	0.068	0.041	0.04
24	0.184	0.183	0.112	0.112	0.067	0.068	0.041	0.04
24.2	0.183	0.183	0.111	0.112	0.068	0.068	0.041	0.04
24.4	0.183	0.183	0.11	0.112	0.068	0.068	0.039	0.04
24.6	0.182	0.183	0.11	0.112	0.068	0.068	0.039	0.04
24.8	0.182	0.183	0.111	0.112	0.068	0.068	0.039	0.04
25	0.183	0.183	0.112	0.112	0.068	0.068	0.039	0.04
25.2	0.184	0.183	0.112	0.112	0.069	0.068	0.04	0.04
25.4	0.183	0.183	0.113	0.112	0.069	0.068	0.04	0.04
25.6	0.183	0.183	0.113	0.112	0.069	0.068	0.04	0.04
25.8	0.184	0.183	0.113	0.112	0.069	0.068	0.041	0.04
26	0.184	0.183	0.114	0.112	0.068	0.068	0.041	0.04
26.2	0.185	0.183	0.114	0.112	0.069	0.068	0.042	0.04
26.4	0.185	0.183	0.115	0.112	0.069	0.068	0.042	0.04
26.6	0.184	0.183	0.114	0.112	0.068	0.068	0.042	0.04
26.8	0.184	0.183	0.114	0.112	0.068	0.068	0.041	0.04
27	0.184	0.183	0.113	0.112	0.068	0.068	0.041	0.04
27.2	0.184	0.183	0.112	0.112	0.067	0.068	0.041	0.04
27.4	0.183	0.183	0.111	0.112	0.067	0.068	0.04	0.04
27.6	0.182	0.183	0.111	0.112	0.067	0.068	0.04	0.04
27.8	0.182	0.183	0.111	0.112	0.066	0.068	0.038	0.04
28	0.182	0.183	0.11	0.112	0.067	0.068	0.038	0.04
28.2	0.182	0.183	0.11	0.112	0.067	0.068	0.037	0.04
28.4	0.182	0.183	0.11	0.112	0.066	0.068	0.036	0.04
28.6	0.182	0.183	0.111	0.112	0.067	0.068	0.037	0.04
28.8	0.182	0.183	0.111	0.112	0.067	0.068	0.037	0.04
29	0.182	0.183	0.111	0.112	0.068	0.068	0.038	0.04
29.2	0.182	0.183	0.111	0.112	0.069	0.068	0.038	0.04
29.4	0.181	0.183	0.111	0.112	0.069	0.068	0.039	0.04
29.6	0.181	0.183	0.112	0.112	0.069	0.068	0.04	0.04
29.8	0.181	0.183	0.112	0.112	0.07	0.068	0.041	0.04
30.001	0.16	0.183	0.099	0.112	0.066	0.068	0.037	0.04
30.201	0.151	0.166	0.094	0.102	0.062	0.062	0.036	0.037
30.401	0.14	0.15	0.088	0.093	0.058	0.056	0.034	0.034
30.601	0.129	0.136	0.082	0.085	0.053	0.051	0.032	0.032
30.801	0.117	0.123	0.076	0.077	0.048	0.046	0.029	0.029
31.001	0.105	0.112	0.069	0.07	0.043	0.042	0.027	0.027
31.201	0.095	0.101	0.063	0.064	0.039	0.038	0.026	0.025
31.401	0.084	0.092	0.056	0.058	0.034	0.035	0.024	0.023
31.601	0.075	0.083	0.05	0.053	0.03	0.032	0.021	0.022
31.801	0.066	0.075	0.045	0.048	0.026	0.029	0.019	0.02
32.001	0.06	0.068	0.04	0.044	0.024	0.026	0.017	0.019
32.201	0.055	0.062	0.036	0.04	0.022	0.024	0.016	0.017
32.401	0.051	0.056	0.033	0.036	0.021	0.022	0.014	0.016
32.601	0.047	0.051	0.03	0.033	0.019	0.02	0.013	0.015
32.801	0.044	0.046	0.028	0.03	0.018	0.018	0.012	0.014
33.001	0.042	0.042	0.026	0.027	0.017	0.016	0.012	0.013
33.201	0.039	0.038	0.025	0.025	0.015	0.015	0.011	0.012
33.401	0.037	0.034	0.023	0.023	0.015	0.013	0.01	0.011
33.601	0.035	0.031	0.022	0.021	0.014	0.012	0.011	0.01
33.801	0.033	0.028	0.019	0.019	0.012	0.011	0.01	0.009
34.001	0.03	0.025	0.017	0.017	0.012	0.01	0.009	0.009
34.201	0.028	0.023	0.017	0.016	0.011	0.009	0.009	0.008
34.401	0.026	0.021	0.015	0.014	0.009	0.008	0.008	0.008
34.601	0.023	0.019	0.014	0.013	0.008	0.008	0.007	0.007
34.801	0.022	0.017	0.013	0.012	0.007	0.007	0.007	0.006
35.001	0.021	0.015	0.013	0.011	0.006	0.006	0.007	0.006
35.201	0.019	0.014	0.012	0.01	0.006	0.006	0.007	0.006
35.401	0.017	0.013	0.011	0.009	0.004	0.005	0.006	0.005
35.601	0.015	0.011	0.011	0.008	0.004	0.005	0.006	0.005
35.801	0.014	0.01	0.01	0.007	0.004	0.004	0.005	0.004
36.001	0.014	0.009	0.009	0.007	0.004	0.004	0.004	0.004
36.201	0.012	0.009	0.008	0.006	0.003	0.004	0.004	0.004
36.401	0.012	0.008	0.007	0.006	0.002	0.003	0.003	0.004
36.601	0.012	0.007	0.008	0.005	0.003	0.003	0.004	0.003
36.801	0.012	0.006	0.008	0.005	0.003	0.003	0.004	0.003
37.001	0.011	0.006	0.009	0.004	0.003	0.002	0.004	0.003
37.201	0.011	0.005	0.009	0.004	0.003	0.002	0.004	0.003
37.401	0.011	0.005	0.008	0.003	0.003	0.002	0.004	0.002
37.601	0.01	0.004	0.007	0.003	0.003	0.002	0.004	0.002
37.801	0.01	0.004	0.006	0.003	0.002	0.002	0.003	0.002
38.001	0.009	0.004	0.006	0.003	0.002	0.001	0.002	0.002
38.201	0.009	0.003	0.006	0.002	0.003	0.001	0.003	0.002
38.401	0.008	0.003	0.005	0.002	0.002	0.001	0.002	0.002
38.601	0.007	0.003	0.005	0.002	0.001	0.001	0.002	0.002
38.801	0.006	0.002	0.004	0.002	0	0.001	0.002	0.001
39.001	0.005	0.002	0.004	0.002	0	0.001	0.002	0.001
39.201	0.004	0.002	0.003	0.002	-0.001	0.001	0.001	0.001
39.401	0.004	0.002	0.003	0.001	-0.002	0.001	0.001	0.001
39.601	0.004	0.002	0.003	0.001	-0.002	0.001	0.001	0.001
39.801	0.004	0.001	0.002	0.001	-0.002	0.001	0	0.001
40.001	0.004	0.001	0.002	0.001	-0.002	0.001	0	0.001
40.201	0.005	0.001	0.002	0.001	-0.002	0.001	0	0.001
40.401	0.005	0.001	0.002	0.001	0	0	0	0.001
40.601	0.006	0.001	0.003	0.001	0	0	0.001	0.001
40.801	0.005	0.001	0.003	0.001	-0.001	0	0	0.001
41.001	0.005	0.001	0.003	0.001	0	0	0	0.001
41.201	0.005	0.001	0.003	0.001	0	0	0	0.001
41.401	0.005	0.001	0.004	0.001	0	0	0	0.001
41.601	0.004	0.001	0.003	0	0	0	0	0
41.801	0.004	0.001	0.002	0	0	0	-0.001	0
42.001	0.004	0	0.003	0	0.001	0	0	0
42.201	0.004	0	0.003	0	0.002	0	0	0
42.401	0.003	0	0.003	0	0.001	0	-0.001	0
42.601	0.003	0	0.003	0	0.001	0	-0.001	0
42.801	0.004	0	0.003	0	0	0	0	0
43.001	0.004	0	0.003	0	0	0	0	0
43.201	0.003	0	0.003	0	-0.001	0	-0.001	0
43.401	0.004	0	0.003	0	-0.001	0	0	0
43.601	0.004	0	0.004	0	0	0	0	0
43.801	0.004	0	0.004	0	0	0	0.001	0
44.001	0.004	0	0.003	0	0	0	0.001	0
44.201	0.005	0	0.003	0	0.001	0	0.002	0
44.401	0.006	0	0.004	0	0.001	0	0.002	0
44.601	0.006	0	0.004	0	0	0	0.002	0
44.801	0.005	0	0.003	0	-0.001	0	0.003	0
45.001	0.006	0	0.004	0	0	0	0.003	0
45.201	0.006	0	0.004	0	0	0	0.003	0
45.401	0.006	0	0.003	0	0	0	0.003	0
45.601	0.005	0	0.003	0	-0.001	0	0.002	0
45.801	0.006	0	0.003	0	0	0	0.003	0
46.001	0.005	0	0.003	0	0	0	0.002	0
46.201	0.005	0	0.003	0	0	0	0.001	0
46.401	0.006	0	0.003	0	0	0	0.002	0
46.601	0.006	0	0.003	0	0	0	0.001	0
46.801	0.006	0	0.003	0	0	0	0.001	0
47.001	0.006	0	0.002	0	-0.001	0	0.001	0
47.201	0.005	0	0.003	0	0	0	0.002	0
47.401	0.005	0	0.003	0	0	0	0.002	0
47.601	0.005	0	0.004	0	0.002	0	0.002	0
47.801	0.005	0	0.004	0	0.002	0	0.002	0
48.001	0.005	0	0.005	0	0.001	0	0.002	0
48.201	0.006	0	0.005	0	0.003	0	0.004	0
48.401	0.005	0	0.006	0	0.004	0	0.004	0
48.601	0.005	0	0.006	0	0.003	0	0.004	0
48.801	0.006	0	0.005	0	0.003	0	0.005	0
49.001	0.006	0	0.005	0	0.003	0	0.004	0
49.201	0.007	0	0.005	0	0.002	0	0.004	0
49.401	0.007	0	0.006	0	0.003	0	0.004	0
49.601	0.006	0	0.005	0	0.003	0	0.003	0
49.801	0.007	0	0.005	0	0.003	0	0.003	0
50.001	0.006	0	0.004	0	0.003	0	0.001	0
50.201	0.005	0	0.003	0	0.002	0	0.001	0
50.401	0.005	0	0.003	0	0.002	0	0	0
50.601	0.005	0	0.002	0	0.001	0	0	0
50.801	0.004	0	0.002	0	0	0	0	0
51.001	0.004	0	0.001	0	-0.001	0	-0.001	0
51.201	0.004	0	0.002	0	0	0	-0.001	0
51.401	0.003	0	0.002	0	-0.001	0	0	0
51.601	0.004	0	0.002	0	-0.001	0	0	0
51.801	0.004	0	0.002	0	-0.001	0	0.001	0
52.001	0.004	0	0.002	0	-0.001	0	0.001	0
52.201	0.004	0	0.003	0	0.001	0	0.002	0
52.401	0.004	0	0.003	0	0.001	0	0.002	0
52.601	0.004	0	0.003	0	0	0	0.003	0
52.801	0.004	0	0.003	0	-0.001	0	0.003	0
53.001	0.005	0	0.004	0	-0.001	0	0.002	0
53.201	0.005	0	0.004	0	0	0	0.003	0
53.401	0.005	0	0.004	0	0	0	0.003	0
53.601	0.005	0	0.004	0	0	0	0.003	0
53.801	0.005	0	0.004	0	0.001	0	0.003	0
54.001	0.004	0	0.004	0	0	0	0.002	0
54.201	0.004	0	0.004	0	0	0	0.002	0
54.401	0.004	0	0.005	0	0	0	0.002	0
54.601	0.004	0	0.005	0	0.001	0	0.002	0
54.801	0.004	0	0.005	0	0	0	0.002	0
55.001	0.004	0	0.005	0	0	0	0.002	0
55.201	0.004	0	0.005	0	0	0	0.002	0
55.401	0.005	0	0.005	0	-0.001	0	0.001	0
55.601	0.005	0	0.005	0	-0.001	0	0.001	0
55.801	0.005	0	0.004	0	0	0	0.001	0
56.001	0.005	0	0.005	0	0	0	0.001	0
56.201	0.005	0	0.005	0	0	0	0.001	0
56.401	0.005	0	0.006	0	0.001	0	0.002	0
56.601	0.005	0	0.005	0	0	0	0.002	0
56.801	0.006	0	0.005	0	0	0	0.002	0
57.001	0.007	0	0.005	0	-0.001	0	0.003	0
57.201	0.007	0	0.005	0	0	0	0.003	0
57.401	0.008	0	0.005	0	0.001	0	0.003	0
57.601	0.008	0	0.005	0	0.001	0	0.003	0
57.801	0.007	0	0.005	0	0.001	0	0.004	0
58.001	0.007	0	0.005	0	0	0	0.003	0
58.201	0.006	0	0.005	0	0.001	0	0.004	0
58.401	0.006	0	0.005	0	0.001	0	0.004	0
58.601	0.006	0	0.005	0	0.001	0	0.004	0
58.801	0.006	0	0.004	0	0.001	0	0.003	0
59.001	0.005	0	0.004	0	0.002	0	0.003	0
59.201	0.005	0	0.003	0	0.002	0	0.002	0
59.401	0.005	0	0.003	0	0.002	0	0.001	0
59.601	0.005	0	0.003	0	0.003	0	0.001	0
59.801	0.005	0	0.003	0	0.003	0	0	0

## Sheet: Fig1c
BLI sensorgrams for Fig.1c Wnt5a binds to FZD3
time (s)	response(nm) 128 nM	fit	response(nm) 64 nM	fit	response(nm) 32 nM	fit	response(nm) 8 nM	fit
0	0.016	0.015	0.008	0.009	0	0	0	0
0.2	0.012	0.015	0.007	0.008	0	0	0	0
0.4	0.014	0.018	0.01	0.009	0	0	0	0
0.6	0.022	0.025	0.013	0.015	0	0	0	0
0.8	0.025	0.027	0.011	0.017	0.001	0.001	0	0
1	0.021	0.022	0.008	0.012	0.001	0.001	0	0
1.2	0.016	0.014	0.008	0.009	0.001	0.001	0	0
1.4	0.018	0.014	0.011	0.011	0.001	0.001	0	0
1.6	0.022	0.018	0.01	0.011	0.001	0.001	0.001	0
1.8	0.021	0.014	0.006	0.007	0.001	0.001	0.001	0
2	0.017	0.007	0.003	0.004	0.002	0.001	0.001	0
2.2	0.015	0.005	0.004	0.002	0.002	0.001	0.001	0
2.4	0.017	0.006	0.006	0.002	0.002	0.002	0.001	0
2.6	0.023	0.012	0.009	0.007	0.002	0.002	0.001	0.001
2.8	0.022	0.013	0.008	0.006	0.002	0.002	0.001	0.001
3	0.016	0.006	0.006	0	0.002	0.002	0.001	0.001
3.2	0.014	0.005	0.009	0.002	0.003	0.002	0.001	0.001
3.4	0.015	0.013	0.012	0.005	0.003	0.002	0.001	0.001
3.6	0.019	0.019	0.011	0.007	0.003	0.002	0.001	0.001
3.8	0.022	0.021	0.011	0.009	0.003	0.002	0.001	0.001
4	0.019	0.019	0.009	0.009	0.003	0.003	0.001	0.001
4.2	0.018	0.02	0.011	0.007	0.003	0.003	0.001	0.001
4.4	0.023	0.025	0.014	0.012	0.004	0.003	0.001	0.001
4.6	0.028	0.029	0.016	0.017	0.004	0.003	0.001	0.001
4.8	0.025	0.024	0.011	0.011	0.004	0.003	0.001	0.001
5	0.018	0.014	0.008	0.005	0.004	0.003	0.002	0.001
5.2	0.016	0.011	0.01	0.006	0.004	0.003	0.002	0.001
5.4	0.021	0.016	0.011	0.008	0.004	0.003	0.002	0.001
5.6	0.022	0.016	0.007	0.005	0.005	0.004	0.002	0.001
5.8	0.02	0.011	0.004	0.004	0.005	0.004	0.002	0.001
6	0.017	0.009	0.004	0.001	0.005	0.004	0.002	0.001
6.2	0.018	0.008	0.006	0.001	0.005	0.004	0.002	0.001
6.4	0.023	0.014	0.009	0.006	0.005	0.004	0.002	0.001
6.6	0.026	0.02	0.01	0.008	0.005	0.004	0.002	0.001
6.8	0.023	0.014	0.008	0.004	0.006	0.004	0.002	0.001
7	0.019	0.01	0.009	0.004	0.006	0.004	0.002	0.001
7.2	0.02	0.016	0.012	0.007	0.006	0.005	0.002	0.001
7.4	0.026	0.023	0.014	0.01	0.006	0.005	0.002	0.001
7.6	0.032	0.027	0.014	0.013	0.006	0.005	0.002	0.002
7.8	0.031	0.028	0.014	0.014	0.006	0.005	0.002	0.002
8	0.027	0.024	0.013	0.011	0.007	0.005	0.002	0.002
8.2	0.029	0.025	0.017	0.013	0.007	0.005	0.003	0.002
8.4	0.033	0.028	0.018	0.017	0.007	0.005	0.003	0.002
8.6	0.032	0.026	0.015	0.014	0.007	0.005	0.003	0.002
8.8	0.025	0.016	0.009	0.007	0.007	0.006	0.003	0.002
9	0.02	0.01	0.01	0.005	0.007	0.006	0.003	0.002
9.2	0.022	0.012	0.011	0.005	0.007	0.006	0.003	0.002
9.4	0.026	0.016	0.01	0.007	0.008	0.006	0.003	0.002
9.6	0.027	0.015	0.008	0.007	0.008	0.006	0.003	0.002
9.8	0.023	0.012	0.008	0.003	0.008	0.006	0.003	0.002
10	0.021	0.008	0.008	0.001	0.008	0.006	0.003	0.002
10.2	0.025	0.013	0.013	0.007	0.008	0.006	0.003	0.002
10.4	0.027	0.02	0.014	0.009	0.008	0.007	0.003	0.002
10.6	0.028	0.019	0.012	0.007	0.009	0.007	0.003	0.002
10.8	0.025	0.015	0.012	0.006	0.009	0.007	0.003	0.002
11	0.022	0.019	0.013	0.008	0.009	0.007	0.003	0.002
11.2	0.028	0.025	0.016	0.011	0.009	0.007	0.003	0.002
11.4	0.036	0.032	0.017	0.015	0.009	0.007	0.004	0.002
11.6	0.037	0.033	0.015	0.017	0.009	0.007	0.004	0.002
11.8	0.033	0.029	0.013	0.013	0.01	0.007	0.004	0.002
12	0.03	0.025	0.014	0.012	0.01	0.008	0.004	0.002
12.2	0.035	0.029	0.018	0.017	0.01	0.008	0.004	0.002
12.4	0.038	0.03	0.015	0.016	0.01	0.008	0.004	0.002
12.6	0.033	0.024	0.01	0.01	0.01	0.008	0.004	0.003
12.8	0.028	0.017	0.008	0.007	0.01	0.008	0.004	0.003
13	0.028	0.018	0.011	0.006	0.011	0.008	0.004	0.003
13.2	0.032	0.021	0.011	0.007	0.011	0.008	0.004	0.003
13.4	0.036	0.026	0.012	0.011	0.011	0.008	0.004	0.003
13.6	0.033	0.023	0.011	0.008	0.011	0.009	0.004	0.003
13.8	0.029	0.017	0.011	0.004	0.011	0.009	0.004	0.003
14	0.029	0.019	0.015	0.008	0.011	0.009	0.004	0.003
14.2	0.032	0.029	0.019	0.013	0.011	0.009	0.004	0.003
14.4	0.034	0.029	0.017	0.012	0.012	0.009	0.004	0.003
14.6	0.032	0.026	0.015	0.011	0.012	0.009	0.004	0.003
14.8	0.029	0.027	0.015	0.012	0.012	0.009	0.005	0.003
15	0.031	0.032	0.018	0.014	0.012	0.009	0.005	0.003
15.2	0.038	0.036	0.019	0.018	0.012	0.009	0.005	0.003
15.4	0.042	0.04	0.019	0.021	0.012	0.01	0.005	0.003
15.6	0.038	0.034	0.015	0.016	0.013	0.01	0.005	0.003
15.8	0.033	0.028	0.016	0.013	0.013	0.01	0.005	0.003
16	0.035	0.029	0.018	0.016	0.013	0.01	0.005	0.003
16.2	0.04	0.034	0.019	0.017	0.013	0.01	0.005	0.003
16.4	0.038	0.03	0.013	0.012	0.013	0.01	0.005	0.003
16.6	0.033	0.022	0.01	0.008	0.013	0.01	0.005	0.003
16.8	0.033	0.023	0.012	0.007	0.014	0.01	0.005	0.003
17	0.037	0.026	0.014	0.009	0.014	0.011	0.005	0.003
17.2	0.041	0.029	0.014	0.012	0.014	0.011	0.005	0.003
17.4	0.04	0.029	0.014	0.01	0.014	0.011	0.005	0.003
17.6	0.034	0.02	0.012	0.005	0.014	0.011	0.005	0.003
17.8	0.033	0.02	0.016	0.007	0.014	0.011	0.005	0.004
18	0.035	0.028	0.017	0.01	0.014	0.011	0.005	0.004
18.2	0.038	0.031	0.017	0.011	0.015	0.011	0.006	0.004
18.4	0.038	0.028	0.015	0.011	0.015	0.011	0.006	0.004
18.6	0.032	0.026	0.014	0.009	0.015	0.012	0.006	0.004
18.8	0.033	0.029	0.016	0.01	0.015	0.012	0.006	0.004
19	0.04	0.034	0.018	0.015	0.015	0.012	0.006	0.004
19.2	0.042	0.036	0.018	0.017	0.015	0.012	0.006	0.004
19.4	0.037	0.03	0.015	0.012	0.016	0.012	0.006	0.004
19.6	0.03	0.022	0.014	0.008	0.016	0.012	0.006	0.004
19.8	0.031	0.023	0.018	0.012	0.016	0.012	0.006	0.004
20	0.035	0.027	0.017	0.012	0.016	0.012	0.006	0.004
20.2	0.035	0.024	0.013	0.008	0.016	0.013	0.006	0.004
20.4	0.03	0.017	0.011	0.006	0.016	0.013	0.006	0.004
20.6	0.028	0.015	0.013	0.003	0.016	0.013	0.006	0.004
20.8	0.031	0.018	0.014	0.004	0.017	0.013	0.006	0.004
21	0.036	0.024	0.016	0.009	0.017	0.013	0.006	0.004
21.2	0.035	0.025	0.015	0.008	0.017	0.013	0.006	0.004
21.4	0.031	0.018	0.013	0.003	0.017	0.013	0.006	0.004
21.6	0.029	0.016	0.015	0.005	0.017	0.013	0.007	0.004
21.8	0.033	0.025	0.019	0.009	0.017	0.013	0.007	0.004
22	0.037	0.031	0.018	0.011	0.018	0.014	0.007	0.004
22.2	0.039	0.031	0.018	0.012	0.018	0.014	0.007	0.004
22.4	0.035	0.031	0.016	0.012	0.018	0.014	0.007	0.004
22.6	0.035	0.033	0.018	0.011	0.018	0.014	0.007	0.004
22.8	0.04	0.038	0.021	0.016	0.018	0.014	0.007	0.004
23	0.044	0.042	0.022	0.02	0.018	0.014	0.007	0.005
23.2	0.041	0.038	0.018	0.016	0.018	0.014	0.007	0.005
23.4	0.035	0.03	0.016	0.011	0.019	0.014	0.007	0.005
23.6	0.034	0.028	0.018	0.012	0.019	0.015	0.007	0.005
23.8	0.039	0.033	0.019	0.014	0.019	0.015	0.007	0.005
24	0.042	0.035	0.016	0.013	0.019	0.015	0.007	0.005
24.2	0.039	0.029	0.012	0.01	0.019	0.015	0.007	0.005
24.4	0.035	0.025	0.011	0.007	0.019	0.015	0.007	0.005
24.6	0.036	0.025	0.011	0.005	0.02	0.015	0.007	0.005
24.8	0.04	0.03	0.013	0.01	0.02	0.015	0.007	0.005
25	0.042	0.033	0.013	0.01	0.02	0.015	0.008	0.005
25.2	0.038	0.026	0.009	0.005	0.02	0.015	0.008	0.005
25.4	0.034	0.021	0.009	0.003	0.02	0.016	0.008	0.005
25.6	0.034	0.026	0.011	0.006	0.02	0.016	0.008	0.005
25.8	0.04	0.034	0.014	0.009	0.02	0.016	0.008	0.005
26	0.043	0.036	0.013	0.012	0.021	0.016	0.008	0.005
26.2	0.04	0.035	0.013	0.011	0.021	0.016	0.008	0.005
26.4	0.038	0.034	0.014	0.01	0.021	0.016	0.008	0.005
26.6	0.042	0.036	0.018	0.014	0.021	0.016	0.008	0.005
26.8	0.047	0.041	0.021	0.019	0.021	0.016	0.008	0.005
27	0.049	0.041	0.02	0.017	0.021	0.017	0.008	0.005
27.2	0.044	0.033	0.016	0.012	0.021	0.017	0.008	0.005
27.4	0.04	0.028	0.017	0.011	0.022	0.017	0.008	0.005
27.6	0.043	0.032	0.019	0.012	0.022	0.017	0.008	0.005
27.8	0.048	0.036	0.018	0.014	0.022	0.017	0.008	0.005
28	0.049	0.036	0.016	0.015	0.022	0.017	0.008	0.005
28.2	0.044	0.03	0.014	0.01	0.022	0.017	0.008	0.006
28.4	0.042	0.028	0.015	0.009	0.022	0.017	0.009	0.006
28.6	0.044	0.031	0.019	0.013	0.023	0.017	0.009	0.006
28.8	0.046	0.037	0.019	0.014	0.023	0.018	0.009	0.006
29	0.043	0.032	0.016	0.01	0.023	0.018	0.009	0.006
29.2	0.037	0.027	0.014	0.008	0.023	0.018	0.009	0.006
29.4	0.033	0.029	0.016	0.008	0.023	0.018	0.009	0.006
29.6	0.037	0.037	0.018	0.011	0.023	0.018	0.009	0.006
29.8	0.044	0.041	0.019	0.015	0.023	0.018	0.009	0.006
30	0.042	0.041	0.017	0.015	0.024	0.018	0.009	0.006
30.2	0.038	0.036	0.016	0.011	0.024	0.018	0.009	0.006
30.4	0.039	0.036	0.019	0.013	0.024	0.019	0.009	0.006
30.6	0.044	0.04	0.022	0.018	0.024	0.019	0.009	0.006
30.8	0.046	0.041	0.019	0.015	0.024	0.019	0.009	0.006
31	0.042	0.034	0.015	0.01	0.024	0.019	0.009	0.006
31.2	0.037	0.027	0.013	0.008	0.024	0.019	0.009	0.006
31.4	0.037	0.027	0.015	0.007	0.025	0.019	0.009	0.006
31.6	0.044	0.033	0.016	0.01	0.025	0.019	0.009	0.006
31.8	0.047	0.034	0.014	0.011	0.025	0.019	0.009	0.006
32	0.043	0.03	0.012	0.008	0.025	0.019	0.01	0.006
32.2	0.04	0.024	0.012	0.004	0.025	0.02	0.01	0.006
32.4	0.04	0.026	0.016	0.008	0.025	0.02	0.01	0.006
32.6	0.042	0.031	0.017	0.009	0.026	0.02	0.01	0.006
32.8	0.042	0.031	0.014	0.007	0.026	0.02	0.01	0.006
33	0.038	0.026	0.012	0.005	0.026	0.02	0.01	0.006
33.2	0.033	0.028	0.012	0.005	0.026	0.02	0.01	0.006
33.4	0.035	0.033	0.015	0.007	0.026	0.02	0.01	0.006
33.6	0.042	0.039	0.016	0.013	0.026	0.02	0.01	0.007
33.8	0.043	0.041	0.016	0.015	0.026	0.02	0.01	0.007
34	0.038	0.036	0.013	0.011	0.027	0.021	0.01	0.007
34.2	0.035	0.032	0.015	0.01	0.027	0.021	0.01	0.007
34.4	0.039	0.036	0.019	0.015	0.027	0.021	0.01	0.007
34.6	0.043	0.039	0.018	0.015	0.027	0.021	0.01	0.007
34.8	0.042	0.036	0.015	0.011	0.027	0.021	0.01	0.007
35	0.038	0.029	0.014	0.009	0.027	0.021	0.01	0.007
35.2	0.038	0.03	0.015	0.008	0.027	0.021	0.01	0.007
35.4	0.045	0.036	0.019	0.011	0.028	0.021	0.01	0.007
35.6	0.05	0.039	0.019	0.015	0.028	0.021	0.011	0.007
35.8	0.047	0.035	0.016	0.01	0.028	0.022	0.011	0.007
36	0.041	0.026	0.014	0.004	0.028	0.022	0.011	0.007
36.2	0.04	0.026	0.017	0.006	0.028	0.022	0.011	0.007
36.4	0.043	0.033	0.019	0.009	0.028	0.022	0.011	0.007
36.6	0.045	0.035	0.018	0.008	0.028	0.022	0.011	0.007
36.8	0.043	0.033	0.015	0.008	0.029	0.022	0.011	0.007
37	0.037	0.032	0.014	0.007	0.029	0.022	0.011	0.007
37.2	0.037	0.034	0.016	0.008	0.029	0.022	0.011	0.007
37.4	0.043	0.04	0.019	0.013	0.029	0.023	0.011	0.007
37.6	0.046	0.043	0.018	0.016	0.029	0.023	0.011	0.007
37.8	0.042	0.038	0.016	0.012	0.029	0.023	0.011	0.007
38	0.037	0.031	0.014	0.009	0.029	0.023	0.011	0.007
38.2	0.038	0.032	0.018	0.013	0.03	0.023	0.011	0.007
38.4	0.043	0.037	0.018	0.014	0.03	0.023	0.011	0.007
38.6	0.047	0.038	0.017	0.013	0.03	0.023	0.011	0.007
38.8	0.044	0.032	0.013	0.011	0.03	0.023	0.011	0.007
39	0.04	0.028	0.012	0.006	0.03	0.023	0.011	0.008
39.2	0.045	0.033	0.015	0.009	0.03	0.024	0.012	0.008
39.4	0.05	0.037	0.016	0.013	0.031	0.024	0.012	0.008
39.6	0.047	0.033	0.012	0.008	0.031	0.024	0.012	0.008
39.8	0.04	0.024	0.009	0.001	0.031	0.024	0.012	0.008
40	0.036	0.02	0.009	0.001	0.031	0.024	0.012	0.008
40.2	0.038	0.027	0.012	0.004	0.031	0.024	0.012	0.008
40.4	0.042	0.032	0.011	0.005	0.031	0.024	0.012	0.008
40.6	0.042	0.032	0.011	0.006	0.031	0.024	0.012	0.008
40.8	0.039	0.032	0.01	0.006	0.032	0.024	0.012	0.008
41	0.036	0.032	0.012	0.005	0.032	0.025	0.012	0.008
41.2	0.041	0.038	0.017	0.01	0.032	0.025	0.012	0.008
41.4	0.046	0.044	0.02	0.016	0.032	0.025	0.012	0.008
41.6	0.045	0.042	0.017	0.014	0.032	0.025	0.012	0.008
41.8	0.04	0.036	0.016	0.011	0.032	0.025	0.012	0.008
42	0.038	0.035	0.018	0.013	0.032	0.025	0.012	0.008
42.2	0.044	0.041	0.021	0.015	0.033	0.025	0.012	0.008
42.4	0.049	0.044	0.02	0.016	0.033	0.025	0.012	0.008
42.6	0.049	0.042	0.019	0.016	0.033	0.025	0.012	0.008
42.8	0.044	0.036	0.016	0.011	0.033	0.026	0.013	0.008
43	0.045	0.036	0.019	0.011	0.033	0.026	0.013	0.008
43.2	0.049	0.04	0.022	0.015	0.033	0.026	0.013	0.008
43.4	0.049	0.041	0.02	0.013	0.033	0.026	0.013	0.008
43.6	0.045	0.033	0.015	0.007	0.034	0.026	0.013	0.008
43.8	0.039	0.027	0.014	0.004	0.034	0.026	0.013	0.008
44	0.039	0.032	0.015	0.006	0.034	0.026	0.013	0.008
44.2	0.045	0.038	0.018	0.008	0.034	0.026	0.013	0.008
44.4	0.049	0.042	0.018	0.011	0.034	0.026	0.013	0.008
44.6	0.048	0.042	0.017	0.011	0.034	0.027	0.013	0.009
44.8	0.045	0.039	0.016	0.009	0.034	0.027	0.013	0.009
45	0.046	0.04	0.02	0.011	0.035	0.027	0.013	0.009
45.2	0.051	0.045	0.021	0.016	0.035	0.027	0.013	0.009
45.4	0.052	0.045	0.019	0.015	0.035	0.027	0.013	0.009
45.6	0.048	0.038	0.015	0.011	0.035	0.027	0.013	0.009
45.8	0.043	0.032	0.015	0.009	0.035	0.027	0.013	0.009
46	0.044	0.034	0.017	0.009	0.035	0.027	0.013	0.009
46.2	0.052	0.04	0.02	0.013	0.035	0.027	0.013	0.009
46.4	0.053	0.04	0.019	0.014	0.036	0.028	0.014	0.009
46.6	0.048	0.034	0.017	0.009	0.036	0.028	0.014	0.009
46.8	0.046	0.031	0.017	0.007	0.036	0.028	0.014	0.009
47	0.049	0.035	0.021	0.011	0.036	0.028	0.014	0.009
47.2	0.049	0.038	0.02	0.011	0.036	0.028	0.014	0.009
47.4	0.049	0.036	0.017	0.008	0.036	0.028	0.014	0.009
47.6	0.044	0.031	0.014	0.006	0.036	0.028	0.014	0.009
47.8	0.042	0.032	0.015	0.006	0.036	0.028	0.014	0.009
48	0.046	0.039	0.017	0.009	0.037	0.028	0.014	0.009
48.2	0.051	0.046	0.02	0.014	0.037	0.028	0.014	0.009
48.4	0.052	0.047	0.017	0.016	0.037	0.029	0.014	0.009
48.6	0.047	0.043	0.015	0.012	0.037	0.029	0.014	0.009
48.8	0.044	0.039	0.016	0.011	0.037	0.029	0.014	0.009
49	0.047	0.043	0.02	0.017	0.037	0.029	0.014	0.009
49.2	0.051	0.046	0.018	0.016	0.037	0.029	0.014	0.009
49.4	0.049	0.042	0.016	0.013	0.038	0.029	0.014	0.009
49.6	0.045	0.035	0.015	0.011	0.038	0.029	0.014	0.009
49.8	0.044	0.036	0.017	0.01	0.038	0.029	0.014	0.009
50	0.051	0.042	0.02	0.014	0.038	0.029	0.014	0.009
50.2	0.057	0.047	0.022	0.018	0.038	0.03	0.015	0.01
50.4	0.053	0.042	0.019	0.013	0.038	0.03	0.015	0.01
50.6	0.049	0.035	0.018	0.009	0.038	0.03	0.015	0.01
50.8	0.049	0.036	0.021	0.011	0.039	0.03	0.015	0.01
51	0.051	0.042	0.021	0.013	0.039	0.03	0.015	0.01
51.2	0.052	0.041	0.018	0.01	0.039	0.03	0.015	0.01
51.4	0.049	0.037	0.016	0.009	0.039	0.03	0.015	0.01
51.6	0.046	0.036	0.015	0.008	0.039	0.03	0.015	0.01
51.8	0.047	0.04	0.018	0.009	0.039	0.03	0.015	0.01
52	0.05	0.045	0.019	0.013	0.039	0.031	0.015	0.01
52.2	0.053	0.05	0.019	0.016	0.04	0.031	0.015	0.01
52.4	0.049	0.044	0.016	0.012	0.04	0.031	0.015	0.01
52.6	0.043	0.039	0.016	0.009	0.04	0.031	0.015	0.01
52.8	0.046	0.041	0.02	0.014	0.04	0.031	0.015	0.01
53	0.051	0.046	0.021	0.015	0.04	0.031	0.015	0.01
53.2	0.053	0.045	0.018	0.014	0.04	0.031	0.015	0.01
53.4	0.05	0.04	0.017	0.012	0.04	0.031	0.015	0.01
53.6	0.047	0.038	0.017	0.009	0.041	0.031	0.015	0.01
53.8	0.053	0.043	0.022	0.013	0.041	0.032	0.015	0.01
54	0.057	0.046	0.022	0.016	0.041	0.032	0.016	0.01
54.2	0.055	0.043	0.02	0.013	0.041	0.032	0.016	0.01
54.4	0.05	0.035	0.018	0.007	0.041	0.032	0.016	0.01
54.6	0.047	0.031	0.019	0.007	0.041	0.032	0.016	0.01
54.8	0.048	0.036	0.021	0.009	0.041	0.032	0.016	0.01
55	0.052	0.04	0.021	0.009	0.041	0.032	0.016	0.01
55.2	0.051	0.038	0.019	0.009	0.042	0.032	0.016	0.01
55.4	0.048	0.037	0.019	0.008	0.042	0.032	0.016	0.01
55.6	0.047	0.039	0.021	0.008	0.042	0.032	0.016	0.01
55.8	0.051	0.046	0.025	0.013	0.042	0.033	0.016	0.01
56	0.055	0.052	0.026	0.018	0.042	0.033	0.016	0.011
56.2	0.055	0.051	0.024	0.016	0.042	0.033	0.016	0.011
56.4	0.05	0.043	0.02	0.012	0.042	0.033	0.016	0.011
56.6	0.048	0.042	0.022	0.013	0.043	0.033	0.016	0.011
56.8	0.053	0.047	0.023	0.015	0.043	0.033	0.016	0.011
57	0.058	0.05	0.021	0.017	0.043	0.033	0.016	0.011
57.2	0.057	0.046	0.019	0.016	0.043	0.033	0.016	0.011
57.4	0.052	0.04	0.017	0.011	0.043	0.033	0.016	0.011
57.6	0.053	0.039	0.019	0.012	0.043	0.034	0.016	0.011
57.8	0.058	0.045	0.023	0.018	0.043	0.034	0.017	0.011
58	0.057	0.044	0.019	0.015	0.044	0.034	0.017	0.011
58.2	0.054	0.037	0.017	0.01	0.044	0.034	0.017	0.011
58.4	0.05	0.033	0.017	0.009	0.044	0.034	0.017	0.011
58.6	0.05	0.038	0.019	0.01	0.044	0.034	0.017	0.011
58.8	0.055	0.045	0.02	0.012	0.044	0.034	0.017	0.011
59	0.058	0.049	0.021	0.016	0.044	0.034	0.017	0.011
59.2	0.057	0.048	0.019	0.016	0.044	0.034	0.017	0.011
59.4	0.053	0.047	0.021	0.013	0.044	0.034	0.017	0.011
59.6	0.054	0.05	0.024	0.016	0.045	0.035	0.017	0.011
59.8	0.06	0.059	0.028	0.022	0.045	0.035	0.017	0.011
60	0.06	0.058	0.026	0.02	0.045	0.035	0.017	0.011
60.2	0.056	0.05	0.022	0.015	0.045	0.035	0.017	0.011
60.4	0.051	0.044	0.021	0.014	0.045	0.035	0.017	0.011
60.6	0.053	0.045	0.024	0.014	0.045	0.035	0.017	0.011
60.8	0.06	0.05	0.024	0.017	0.045	0.035	0.017	0.011
61	0.061	0.049	0.024	0.018	0.046	0.035	0.017	0.011
61.2	0.055	0.041	0.02	0.012	0.046	0.035	0.017	0.011
61.4	0.054	0.037	0.022	0.01	0.046	0.036	0.017	0.011
61.6	0.056	0.041	0.026	0.014	0.046	0.036	0.018	0.011
61.8	0.058	0.044	0.024	0.014	0.046	0.036	0.018	0.012
62	0.056	0.039	0.019	0.009	0.046	0.036	0.018	0.012
62.2	0.052	0.033	0.018	0.007	0.046	0.036	0.018	0.012
62.4	0.051	0.038	0.019	0.008	0.046	0.036	0.018	0.012
62.6	0.054	0.044	0.021	0.01	0.047	0.036	0.018	0.012
62.8	0.059	0.05	0.023	0.015	0.047	0.036	0.018	0.012
63	0.061	0.052	0.021	0.017	0.047	0.036	0.018	0.012
63.2	0.056	0.048	0.019	0.013	0.047	0.036	0.018	0.012
63.4	0.053	0.046	0.023	0.013	0.047	0.037	0.018	0.012
63.6	0.057	0.055	0.028	0.019	0.047	0.037	0.018	0.012
63.8	0.062	0.058	0.027	0.019	0.047	0.037	0.018	0.012
64	0.059	0.051	0.023	0.015	0.048	0.037	0.018	0.012
64.2	0.055	0.044	0.022	0.013	0.048	0.037	0.018	0.012
64.4	0.056	0.045	0.023	0.013	0.048	0.037	0.018	0.012
64.6	0.064	0.051	0.026	0.017	0.048	0.037	0.018	0.012
64.8	0.068	0.054	0.026	0.02	0.048	0.037	0.018	0.012
65	0.064	0.048	0.023	0.015	0.048	0.037	0.018	0.012
65.2	0.059	0.041	0.022	0.011	0.048	0.037	0.018	0.012
65.4	0.059	0.04	0.025	0.013	0.048	0.038	0.018	0.012
65.6	0.06	0.046	0.026	0.014	0.049	0.038	0.019	0.012
65.8	0.062	0.045	0.023	0.012	0.049	0.038	0.019	0.012
66	0.058	0.04	0.02	0.01	0.049	0.038	0.019	0.012
66.2	0.055	0.041	0.021	0.01	0.049	0.038	0.019	0.012
66.4	0.058	0.047	0.023	0.012	0.049	0.038	0.019	0.012
66.6	0.062	0.052	0.024	0.017	0.049	0.038	0.019	0.012
66.8	0.066	0.057	0.024	0.02	0.049	0.038	0.019	0.012
67	0.062	0.052	0.021	0.015	0.05	0.038	0.019	0.012
67.2	0.056	0.048	0.022	0.014	0.05	0.039	0.019	0.012
67.4	0.058	0.05	0.025	0.017	0.05	0.039	0.019	0.012
67.6	0.062	0.055	0.025	0.018	0.05	0.039	0.019	0.012
67.8	0.063	0.05	0.02	0.016	0.05	0.039	0.019	0.013
68	0.057	0.043	0.018	0.012	0.05	0.039	0.019	0.013
68.2	0.055	0.041	0.019	0.01	0.05	0.039	0.019	0.013
68.4	0.061	0.047	0.023	0.014	0.05	0.039	0.019	0.013
68.6	0.066	0.051	0.024	0.018	0.051	0.039	0.019	0.013
68.8	0.063	0.049	0.021	0.014	0.051	0.039	0.019	0.013
69	0.059	0.041	0.019	0.009	0.051	0.039	0.019	0.013
69.2	0.056	0.039	0.022	0.009	0.051	0.04	0.019	0.013
69.4	0.057	0.044	0.023	0.011	0.051	0.04	0.02	0.013
69.6	0.062	0.05	0.024	0.012	0.051	0.04	0.02	0.013
69.8	0.063	0.05	0.023	0.013	0.051	0.04	0.02	0.013
70	0.06	0.048	0.022	0.012	0.051	0.04	0.02	0.013
70.2	0.06	0.05	0.024	0.012	0.052	0.04	0.02	0.013
70.4	0.064	0.056	0.028	0.018	0.052	0.04	0.02	0.013
70.6	0.068	0.061	0.029	0.022	0.052	0.04	0.02	0.013
70.8	0.066	0.058	0.026	0.019	0.052	0.04	0.02	0.013
71	0.059	0.048	0.023	0.015	0.052	0.04	0.02	0.013
71.2	0.058	0.047	0.024	0.017	0.052	0.041	0.02	0.013
71.4	0.062	0.05	0.024	0.018	0.052	0.041	0.02	0.013
71.6	0.066	0.052	0.022	0.018	0.053	0.041	0.02	0.013
71.8	0.064	0.047	0.019	0.017	0.053	0.041	0.02	0.013
72	0.059	0.042	0.017	0.012	0.053	0.041	0.02	0.013
72.2	0.061	0.043	0.02	0.012	0.053	0.041	0.02	0.013
72.4	0.065	0.049	0.024	0.018	0.053	0.041	0.02	0.013
72.6	0.066	0.05	0.021	0.016	0.053	0.041	0.02	0.013
72.8	0.062	0.044	0.018	0.011	0.053	0.041	0.02	0.013
73	0.058	0.039	0.018	0.009	0.053	0.041	0.02	0.013
73.2	0.059	0.044	0.02	0.011	0.054	0.042	0.02	0.013
73.4	0.063	0.049	0.021	0.012	0.054	0.042	0.02	0.013
73.6	0.065	0.052	0.021	0.015	0.054	0.042	0.021	0.013
73.8	0.064	0.051	0.021	0.015	0.054	0.042	0.021	0.014
74	0.06	0.05	0.022	0.013	0.054	0.042	0.021	0.014
74.2	0.061	0.053	0.025	0.016	0.054	0.042	0.021	0.014
74.4	0.065	0.059	0.028	0.022	0.054	0.042	0.021	0.014
74.6	0.066	0.059	0.025	0.02	0.054	0.042	0.021	0.014
74.8	0.061	0.05	0.021	0.015	0.055	0.042	0.021	0.014
75	0.057	0.045	0.021	0.015	0.055	0.042	0.021	0.014
75.2	0.061	0.051	0.024	0.017	0.055	0.043	0.021	0.014
75.4	0.068	0.056	0.024	0.02	0.055	0.043	0.021	0.014
75.6	0.07	0.056	0.023	0.02	0.055	0.043	0.021	0.014
75.8	0.065	0.049	0.02	0.015	0.055	0.043	0.021	0.014
76	0.063	0.046	0.022	0.013	0.055	0.043	0.021	0.014
76.2	0.066	0.05	0.026	0.017	0.055	0.043	0.021	0.014
76.4	0.068	0.054	0.025	0.018	0.056	0.043	0.021	0.014
76.6	0.067	0.05	0.022	0.013	0.056	0.043	0.021	0.014
76.8	0.061	0.043	0.02	0.01	0.056	0.043	0.021	0.014
77	0.059	0.045	0.022	0.01	0.056	0.043	0.021	0.014
77.2	0.063	0.052	0.024	0.012	0.056	0.044	0.021	0.014
77.4	0.067	0.056	0.025	0.016	0.056	0.044	0.021	0.014
77.6	0.066	0.057	0.025	0.017	0.056	0.044	0.022	0.014
77.8	0.061	0.052	0.024	0.013	0.056	0.044	0.022	0.014
78	0.059	0.052	0.026	0.014	0.057	0.044	0.022	0.014
78.2	0.062	0.057	0.029	0.019	0.057	0.044	0.022	0.014
78.4	0.065	0.057	0.026	0.017	0.057	0.044	0.022	0.014
78.6	0.061	0.049	0.022	0.014	0.057	0.044	0.022	0.014
78.8	0.056	0.045	0.019	0.012	0.057	0.044	0.022	0.014
79	0.058	0.045	0.02	0.011	0.057	0.044	0.022	0.014
79.2	0.066	0.052	0.022	0.016	0.057	0.044	0.022	0.014
79.4	0.07	0.053	0.021	0.018	0.058	0.045	0.022	0.014
79.6	0.066	0.047	0.019	0.014	0.058	0.045	0.022	0.014
79.8	0.064	0.042	0.02	0.011	0.058	0.045	0.022	0.015
80	0.064	0.043	0.023	0.014	0.058	0.045	0.022	0.015
80.2	0.068	0.049	0.024	0.016	0.058	0.045	0.022	0.015
80.4	0.07	0.05	0.022	0.015	0.058	0.045	0.022	0.015
80.6	0.068	0.046	0.021	0.015	0.058	0.045	0.022	0.015
80.8	0.065	0.048	0.023	0.015	0.058	0.045	0.022	0.015
81	0.068	0.053	0.026	0.016	0.059	0.045	0.022	0.015
81.2	0.074	0.062	0.03	0.023	0.059	0.045	0.022	0.015
81.4	0.077	0.066	0.032	0.026	0.059	0.046	0.022	0.015
81.6	0.072	0.061	0.028	0.021	0.059	0.046	0.022	0.015
81.8	0.066	0.055	0.027	0.018	0.059	0.046	0.023	0.015
82	0.068	0.06	0.03	0.023	0.059	0.046	0.023	0.015
82.2	0.072	0.063	0.03	0.023	0.059	0.046	0.023	0.015
82.4	0.07	0.057	0.025	0.019	0.059	0.046	0.023	0.015
82.6	0.066	0.051	0.022	0.017	0.06	0.046	0.023	0.015
82.8	0.065	0.051	0.022	0.014	0.06	0.046	0.023	0.015
83	0.071	0.053	0.024	0.017	0.06	0.046	0.023	0.015
83.2	0.076	0.058	0.026	0.021	0.06	0.046	0.023	0.015
83.4	0.073	0.055	0.023	0.017	0.06	0.047	0.023	0.015
83.6	0.068	0.046	0.02	0.011	0.06	0.047	0.023	0.015
83.8	0.065	0.043	0.022	0.011	0.06	0.047	0.023	0.015
84	0.067	0.05	0.024	0.014	0.06	0.047	0.023	0.015
84.2	0.07	0.054	0.023	0.014	0.061	0.047	0.023	0.015
84.4	0.069	0.052	0.021	0.014	0.061	0.047	0.023	0.015
84.6	0.066	0.051	0.022	0.013	0.061	0.047	0.023	0.015
84.8	0.065	0.053	0.024	0.013	0.061	0.047	0.023	0.015
85	0.067	0.058	0.027	0.017	0.061	0.047	0.023	0.015
85.2	0.071	0.065	0.03	0.022	0.061	0.047	0.023	0.015
85.4	0.068	0.06	0.027	0.018	0.061	0.047	0.023	0.015
85.6	0.061	0.051	0.023	0.013	0.061	0.048	0.023	0.015
85.8	0.059	0.052	0.026	0.015	0.061	0.048	0.024	0.015
86	0.065	0.058	0.028	0.018	0.062	0.048	0.024	0.016
86.2	0.07	0.058	0.027	0.019	0.062	0.048	0.024	0.016
86.4	0.069	0.054	0.025	0.017	0.062	0.048	0.024	0.016
86.6	0.066	0.05	0.025	0.014	0.062	0.048	0.024	0.016
86.8	0.07	0.051	0.029	0.016	0.062	0.048	0.024	0.016
87	0.074	0.055	0.031	0.02	0.062	0.048	0.024	0.016
87.2	0.075	0.056	0.029	0.019	0.062	0.048	0.024	0.016
87.4	0.072	0.048	0.025	0.014	0.062	0.048	0.024	0.016
87.6	0.067	0.043	0.025	0.013	0.063	0.049	0.024	0.016
87.8	0.068	0.047	0.027	0.014	0.063	0.049	0.024	0.016
88	0.073	0.054	0.028	0.017	0.063	0.049	0.024	0.016
88.2	0.076	0.055	0.027	0.019	0.063	0.049	0.024	0.016
88.4	0.072	0.054	0.026	0.018	0.063	0.049	0.024	0.016
88.6	0.069	0.053	0.027	0.015	0.063	0.049	0.024	0.016
88.8	0.071	0.057	0.03	0.02	0.063	0.049	0.024	0.016
89	0.075	0.064	0.032	0.024	0.063	0.049	0.024	0.016
89.2	0.075	0.063	0.029	0.021	0.064	0.049	0.024	0.016
89.4	0.069	0.054	0.024	0.017	0.064	0.049	0.024	0.016
89.6	0.066	0.054	0.025	0.017	0.064	0.049	0.024	0.016
89.8	0.07	0.059	0.026	0.019	0.064	0.05	0.024	0.016
90	0.077	0.062	0.026	0.021	0.064	0.05	0.024	0.016
90.2	0.078	0.059	0.024	0.021	0.064	0.05	0.025	0.016
90.4	0.073	0.053	0.022	0.016	0.064	0.05	0.025	0.016
90.6	0.073	0.049	0.023	0.015	0.064	0.05	0.025	0.016
90.8	0.076	0.053	0.027	0.019	0.065	0.05	0.025	0.016
91	0.076	0.055	0.025	0.018	0.065	0.05	0.025	0.016
91.2	0.074	0.049	0.022	0.014	0.065	0.05	0.025	0.016
91.4	0.069	0.044	0.021	0.011	0.065	0.05	0.025	0.016
91.6	0.067	0.047	0.023	0.012	0.065	0.05	0.025	0.016
91.8	0.072	0.054	0.026	0.015	0.065	0.051	0.025	0.016
92	0.077	0.061	0.028	0.019	0.065	0.051	0.025	0.016
92.2	0.077	0.062	0.029	0.02	0.065	0.051	0.025	0.016
92.4	0.072	0.06	0.028	0.017	0.066	0.051	0.025	0.017
92.6	0.072	0.062	0.031	0.02	0.066	0.051	0.025	0.017
92.8	0.077	0.071	0.035	0.026	0.066	0.051	0.025	0.017
93	0.079	0.072	0.033	0.025	0.066	0.051	0.025	0.017
93.2	0.076	0.065	0.028	0.022	0.066	0.051	0.025	0.017
93.4	0.071	0.061	0.027	0.02	0.066	0.051	0.025	0.017
93.6	0.073	0.065	0.028	0.021	0.066	0.051	0.025	0.017
93.8	0.08	0.067	0.029	0.024	0.066	0.051	0.025	0.017
94	0.083	0.067	0.029	0.026	0.066	0.052	0.025	0.017
94.2	0.079	0.059	0.026	0.021	0.067	0.052	0.025	0.017
94.4	0.075	0.053	0.025	0.017	0.067	0.052	0.026	0.017
94.6	0.074	0.052	0.028	0.018	0.067	0.052	0.026	0.017
94.8	0.076	0.057	0.028	0.019	0.067	0.052	0.026	0.017
95	0.076	0.053	0.025	0.016	0.067	0.052	0.026	0.017
95.2	0.071	0.047	0.023	0.013	0.067	0.052	0.026	0.017
95.4	0.068	0.047	0.023	0.011	0.067	0.052	0.026	0.017
95.6	0.071	0.054	0.026	0.014	0.067	0.052	0.026	0.017
95.8	0.076	0.06	0.028	0.019	0.068	0.052	0.026	0.017
96	0.078	0.063	0.029	0.021	0.068	0.052	0.026	0.017
96.2	0.073	0.059	0.027	0.017	0.068	0.053	0.026	0.017
96.4	0.069	0.057	0.028	0.017	0.068	0.053	0.026	0.017
96.6	0.072	0.063	0.032	0.022	0.068	0.053	0.026	0.017
96.8	0.077	0.068	0.031	0.023	0.068	0.053	0.026	0.017
97	0.077	0.064	0.027	0.021	0.068	0.053	0.026	0.017
97.2	0.073	0.061	0.025	0.02	0.068	0.053	0.026	0.017
97.4	0.071	0.059	0.026	0.018	0.068	0.053	0.026	0.017
97.6	0.078	0.064	0.03	0.023	0.069	0.053	0.026	0.017
97.8	0.083	0.066	0.031	0.026	0.069	0.053	0.026	0.017
98	0.079	0.062	0.028	0.021	0.069	0.053	0.026	0.017
98.2	0.075	0.052	0.026	0.017	0.069	0.053	0.026	0.017
98.4	0.071	0.049	0.027	0.016	0.069	0.054	0.026	0.017
98.6	0.072	0.053	0.028	0.017	0.069	0.054	0.026	0.017
98.8	0.075	0.054	0.027	0.017	0.069	0.054	0.027	0.017
99	0.072	0.05	0.025	0.015	0.069	0.054	0.027	0.018
99.2	0.068	0.047	0.024	0.013	0.07	0.054	0.027	0.018
99.4	0.068	0.05	0.026	0.013	0.07	0.054	0.027	0.018
99.6	0.073	0.059	0.03	0.02	0.07	0.054	0.027	0.018
99.8	0.078	0.064	0.032	0.024	0.07	0.054	0.027	0.018
100	0.074	0.06	0.029	0.019	0.07	0.054	0.027	0.018
100.2	0.069	0.055	0.028	0.017	0.07	0.054	0.027	0.018
100.4	0.071	0.06	0.031	0.022	0.07	0.054	0.027	0.018
100.6	0.077	0.065	0.032	0.024	0.07	0.055	0.027	0.018
100.8	0.082	0.066	0.03	0.025	0.07	0.055	0.027	0.018
101	0.08	0.062	0.028	0.024	0.071	0.055	0.027	0.018
101.2	0.076	0.058	0.027	0.02	0.071	0.055	0.027	0.018
101.4	0.079	0.057	0.029	0.021	0.071	0.055	0.027	0.018
101.6	0.084	0.062	0.032	0.026	0.071	0.055	0.027	0.018
101.8	0.083	0.059	0.028	0.022	0.071	0.055	0.027	0.018
102	0.078	0.049	0.025	0.016	0.071	0.055	0.027	0.018
102.2	0.072	0.043	0.024	0.013	0.071	0.055	0.027	0.018
102.4	0.071	0.047	0.026	0.014	0.071	0.055	0.027	0.018
102.6	0.075	0.051	0.026	0.014	0.072	0.055	0.027	0.018
102.8	0.075	0.051	0.025	0.015	0.072	0.056	0.027	0.018
103	0.071	0.049	0.024	0.012	0.072	0.056	0.027	0.018
103.2	0.069	0.05	0.025	0.011	0.072	0.056	0.028	0.018
103.4	0.072	0.056	0.029	0.016	0.072	0.056	0.028	0.018
103.6	0.076	0.064	0.031	0.02	0.072	0.056	0.028	0.018
103.8	0.077	0.064	0.03	0.019	0.072	0.056	0.028	0.018
104	0.072	0.057	0.026	0.016	0.072	0.056	0.028	0.018
104.2	0.072	0.06	0.03	0.019	0.072	0.056	0.028	0.018
104.4	0.079	0.069	0.033	0.024	0.073	0.056	0.028	0.018
104.6	0.086	0.071	0.033	0.026	0.073	0.056	0.028	0.018
104.8	0.086	0.069	0.031	0.027	0.073	0.056	0.028	0.018
105	0.082	0.064	0.029	0.022	0.073	0.057	0.028	0.018
105.2	0.084	0.062	0.032	0.023	0.073	0.057	0.028	0.018
105.4	0.088	0.065	0.034	0.027	0.073	0.057	0.028	0.019
105.6	0.089	0.067	0.033	0.026	0.073	0.057	0.028	0.019
105.8	0.086	0.059	0.03	0.02	0.073	0.057	0.028	0.019
106	0.08	0.052	0.029	0.017	0.074	0.057	0.028	0.019
106.2	0.078	0.054	0.03	0.016	0.074	0.057	0.028	0.019
106.4	0.083	0.061	0.032	0.018	0.074	0.057	0.028	0.019
106.6	0.085	0.064	0.031	0.021	0.074	0.057	0.028	0.019
106.8	0.083	0.063	0.03	0.02	0.074	0.057	0.028	0.019
107	0.077	0.058	0.029	0.015	0.074	0.057	0.028	0.019
107.2	0.077	0.061	0.032	0.019	0.074	0.058	0.028	0.019
107.4	0.08	0.067	0.034	0.023	0.074	0.058	0.028	0.019
107.6	0.079	0.066	0.03	0.019	0.074	0.058	0.029	0.019
107.8	0.076	0.06	0.027	0.017	0.075	0.058	0.029	0.019
108	0.07	0.056	0.026	0.016	0.075	0.058	0.029	0.019
108.2	0.073	0.06	0.028	0.017	0.075	0.058	0.029	0.019
108.4	0.08	0.065	0.03	0.021	0.075	0.058	0.029	0.019
108.6	0.082	0.063	0.028	0.022	0.075	0.058	0.029	0.019
108.8	0.076	0.057	0.025	0.017	0.075	0.058	0.029	0.019
109	0.076	0.053	0.027	0.016	0.075	0.058	0.029	0.019
109.2	0.08	0.058	0.032	0.021	0.075	0.058	0.029	0.019
109.4	0.081	0.059	0.03	0.02	0.075	0.059	0.029	0.019
109.6	0.08	0.054	0.027	0.016	0.076	0.059	0.029	0.019
109.8	0.076	0.05	0.027	0.015	0.076	0.059	0.029	0.019
110	0.074	0.052	0.029	0.015	0.076	0.059	0.029	0.019
110.2	0.078	0.059	0.032	0.018	0.076	0.059	0.029	0.019
110.4	0.085	0.067	0.035	0.025	0.076	0.059	0.029	0.019
110.6	0.088	0.069	0.037	0.028	0.076	0.059	0.029	0.019
110.8	0.084	0.067	0.036	0.024	0.076	0.059	0.029	0.019
111	0.082	0.066	0.037	0.025	0.076	0.059	0.029	0.019
111.2	0.087	0.075	0.042	0.032	0.076	0.059	0.029	0.019
111.4	0.089	0.076	0.039	0.03	0.077	0.059	0.029	0.019
111.6	0.086	0.07	0.033	0.026	0.077	0.059	0.029	0.019
111.8	0.082	0.066	0.031	0.024	0.077	0.06	0.029	0.019
112	0.081	0.065	0.031	0.022	0.077	0.06	0.029	0.019
112.2	0.086	0.067	0.033	0.025	0.077	0.06	0.03	0.02
112.4	0.09	0.07	0.033	0.028	0.077	0.06	0.03	0.02
112.6	0.088	0.065	0.029	0.023	0.077	0.06	0.03	0.02
112.8	0.084	0.056	0.027	0.018	0.077	0.06	0.03	0.02
113	0.082	0.053	0.028	0.018	0.077	0.06	0.03	0.02
113.2	0.084	0.059	0.03	0.019	0.078	0.06	0.03	0.02
113.4	0.085	0.057	0.027	0.017	0.078	0.06	0.03	0.02
113.6	0.083	0.055	0.026	0.017	0.078	0.06	0.03	0.02
113.8	0.08	0.056	0.027	0.016	0.078	0.06	0.03	0.02
114	0.081	0.06	0.029	0.017	0.078	0.061	0.03	0.02
114.2	0.086	0.067	0.034	0.023	0.078	0.061	0.03	0.02
114.4	0.091	0.074	0.038	0.029	0.078	0.061	0.03	0.02
114.6	0.088	0.071	0.036	0.025	0.078	0.061	0.03	0.02
114.8	0.083	0.067	0.036	0.024	0.078	0.061	0.03	0.02
115	0.084	0.071	0.037	0.027	0.079	0.061	0.03	0.02
115.2	0.09	0.078	0.039	0.029	0.079	0.061	0.03	0.02
115.4	0.093	0.076	0.035	0.029	0.079	0.061	0.03	0.02
115.6	0.089	0.072	0.033	0.027	0.079	0.061	0.03	0.02
115.8	0.086	0.068	0.033	0.024	0.079	0.061	0.03	0.02
116	0.09	0.07	0.037	0.027	0.079	0.061	0.03	0.02
116.2	0.093	0.072	0.038	0.03	0.079	0.061	0.03	0.02
116.4	0.092	0.069	0.034	0.026	0.079	0.062	0.03	0.02
116.6	0.087	0.058	0.031	0.02	0.079	0.062	0.03	0.02
116.8	0.08	0.051	0.03	0.017	0.08	0.062	0.031	0.02
117	0.079	0.053	0.032	0.017	0.08	0.062	0.031	0.02
117.2	0.083	0.059	0.033	0.019	0.08	0.062	0.031	0.02
117.4	0.085	0.059	0.031	0.02	0.08	0.062	0.031	0.02
117.6	0.081	0.057	0.029	0.017	0.08	0.062	0.031	0.02
117.8	0.077	0.055	0.03	0.015	0.08	0.062	0.031	0.02
118	0.08	0.062	0.034	0.02	0.08	0.062	0.031	0.02
118.2	0.083	0.066	0.035	0.023	0.08	0.062	0.031	0.02
118.4	0.083	0.067	0.034	0.022	0.08	0.062	0.031	0.02
118.6	0.079	0.059	0.03	0.019	0.081	0.063	0.031	0.02
118.8	0.077	0.061	0.032	0.021	0.081	0.063	0.031	0.02
119	0.082	0.066	0.033	0.023	0.081	0.063	0.031	0.021
119.2	0.089	0.072	0.035	0.027	0.081	0.063	0.031	0.021
119.4	0.091	0.07	0.034	0.028	0.081	0.063	0.031	0.021
119.6	0.086	0.064	0.032	0.023	0.081	0.063	0.031	0.021
119.8	0.087	0.061	0.035	0.022	0.081	0.063	0.031	0.021
120	0.092	0.067	0.039	0.027	0.081	0.063	0.031	0.021
120.2	0.091	0.065	0.036	0.025	0.081	0.063	0.031	0.021
120.4	0.087	0.057	0.032	0.018	0.082	0.063	0.031	0.021
120.6	0.081	0.051	0.032	0.016	0.082	0.063	0.031	0.021
120.8	0.08	0.054	0.033	0.017	0.082	0.063	0.031	0.021
121	0.084	0.059	0.034	0.018	0.082	0.064	0.031	0.021
121.2	0.088	0.064	0.035	0.021	0.082	0.064	0.031	0.021
121.4	0.086	0.062	0.032	0.019	0.082	0.064	0.031	0.021
121.6	0.081	0.059	0.031	0.016	0.082	0.064	0.032	0.021
121.8	0.081	0.062	0.033	0.019	0.082	0.064	0.032	0.021
122	0.085	0.069	0.035	0.024	0.082	0.064	0.032	0.021
122.2	0.086	0.069	0.033	0.022	0.083	0.064	0.032	0.021
122.4	0.084	0.066	0.031	0.021	0.083	0.064	0.032	0.021
122.6	0.082	0.064	0.032	0.021	0.083	0.064	0.032	0.021
122.8	0.086	0.07	0.035	0.024	0.083	0.064	0.032	0.021
123	0.094	0.075	0.037	0.029	0.083	0.064	0.032	0.021
123.2	0.098	0.077	0.037	0.031	0.083	0.064	0.032	0.021
123.4	0.095	0.071	0.034	0.027	0.083	0.065	0.032	0.021
123.6	0.094	0.067	0.037	0.025	0.083	0.065	0.032	0.021
123.8	0.097	0.07	0.04	0.029	0.083	0.065	0.032	0.021
124	0.1	0.075	0.04	0.03	0.084	0.065	0.032	0.021
124.2	0.099	0.069	0.036	0.025	0.084	0.065	0.032	0.021
124.4	0.093	0.062	0.034	0.022	0.084	0.065	0.032	0.021
124.6	0.09	0.063	0.035	0.022	0.084	0.065	0.032	0.021
124.8	0.094	0.07	0.038	0.024	0.084	0.065	0.032	0.021
125	0.097	0.074	0.038	0.027	0.084	0.065	0.032	0.021
125.2	0.096	0.074	0.036	0.026	0.084	0.065	0.032	0.021
125.4	0.09	0.069	0.033	0.022	0.084	0.065	0.032	0.021
125.6	0.087	0.068	0.035	0.023	0.084	0.065	0.032	0.021
125.8	0.088	0.072	0.037	0.025	0.084	0.066	0.032	0.021
126	0.091	0.076	0.036	0.026	0.085	0.066	0.032	0.022
126.2	0.091	0.072	0.033	0.025	0.085	0.066	0.032	0.022
126.4	0.087	0.068	0.032	0.023	0.085	0.066	0.033	0.022
126.6	0.088	0.07	0.034	0.024	0.085	0.066	0.033	0.022
126.8	0.095	0.075	0.038	0.03	0.085	0.066	0.033	0.022
127	0.1	0.078	0.038	0.033	0.085	0.066	0.033	0.022
127.2	0.097	0.072	0.035	0.028	0.085	0.066	0.033	0.022
127.4	0.094	0.065	0.035	0.024	0.085	0.066	0.033	0.022
127.6	0.096	0.068	0.039	0.028	0.085	0.066	0.033	0.022
127.8	0.097	0.07	0.038	0.028	0.086	0.066	0.033	0.022
128	0.097	0.069	0.036	0.024	0.086	0.066	0.033	0.022
128.2	0.094	0.063	0.033	0.022	0.086	0.067	0.033	0.022
128.4	0.089	0.062	0.033	0.02	0.086	0.067	0.033	0.022
128.6	0.09	0.066	0.035	0.02	0.086	0.067	0.033	0.022
128.8	0.094	0.073	0.037	0.025	0.086	0.067	0.033	0.022
129	0.094	0.074	0.035	0.024	0.086	0.067	0.033	0.022
129.2	0.089	0.069	0.031	0.018	0.086	0.067	0.033	0.022
129.4	0.085	0.065	0.032	0.018	0.086	0.067	0.033	0.022
129.6	0.085	0.069	0.034	0.021	0.087	0.067	0.033	0.022
129.8	0.089	0.074	0.034	0.022	0.087	0.067	0.033	0.022
130	0.093	0.073	0.033	0.024	0.087	0.067	0.033	0.022
130.2	0.09	0.069	0.031	0.023	0.087	0.067	0.033	0.022
130.4	0.088	0.068	0.033	0.022	0.087	0.067	0.033	0.022
130.6	0.093	0.071	0.037	0.027	0.087	0.068	0.033	0.022
130.8	0.098	0.075	0.04	0.032	0.087	0.068	0.033	0.022
131	0.098	0.071	0.037	0.029	0.087	0.068	0.033	0.022
131.2	0.094	0.063	0.035	0.024	0.087	0.068	0.034	0.022
131.4	0.092	0.06	0.037	0.024	0.087	0.068	0.034	0.022
131.6	0.094	0.066	0.038	0.026	0.088	0.068	0.034	0.022
131.8	0.097	0.068	0.037	0.025	0.088	0.068	0.034	0.022
132	0.097	0.067	0.036	0.025	0.088	0.068	0.034	0.022
132.2	0.093	0.064	0.033	0.022	0.088	0.068	0.034	0.022
132.4	0.091	0.066	0.035	0.021	0.088	0.068	0.034	0.022
132.6	0.094	0.072	0.037	0.025	0.088	0.068	0.034	0.022
132.8	0.095	0.076	0.037	0.027	0.088	0.068	0.034	0.022
133	0.094	0.073	0.034	0.023	0.088	0.069	0.034	0.022
133.2	0.089	0.068	0.032	0.021	0.088	0.069	0.034	0.023
133.4	0.087	0.069	0.033	0.022	0.089	0.069	0.034	0.023
133.6	0.092	0.075	0.035	0.025	0.089	0.069	0.034	0.023
133.8	0.099	0.077	0.035	0.028	0.089	0.069	0.034	0.023
134	0.097	0.075	0.033	0.028	0.089	0.069	0.034	0.023
134.2	0.094	0.07	0.033	0.024	0.089	0.069	0.034	0.023
134.4	0.095	0.071	0.037	0.027	0.089	0.069	0.034	0.023
134.6	0.1	0.075	0.039	0.031	0.089	0.069	0.034	0.023
134.8	0.102	0.074	0.037	0.028	0.089	0.069	0.034	0.023
135	0.098	0.064	0.033	0.022	0.089	0.069	0.034	0.023
135.2	0.094	0.06	0.033	0.02	0.089	0.069	0.034	0.023
135.4	0.094	0.064	0.035	0.021	0.09	0.069	0.034	0.023
135.6	0.099	0.069	0.035	0.022	0.09	0.07	0.034	0.023
135.8	0.102	0.071	0.035	0.025	0.09	0.07	0.034	0.023
136	0.097	0.068	0.032	0.022	0.09	0.07	0.035	0.023
136.2	0.092	0.065	0.032	0.018	0.09	0.07	0.035	0.023
136.4	0.093	0.07	0.035	0.023	0.09	0.07	0.035	0.023
136.6	0.094	0.076	0.037	0.026	0.09	0.07	0.035	0.023
136.8	0.096	0.076	0.035	0.025	0.09	0.07	0.035	0.023
137	0.093	0.071	0.034	0.023	0.09	0.07	0.035	0.023
137.2	0.088	0.07	0.033	0.023	0.09	0.07	0.035	0.023
137.4	0.093	0.076	0.037	0.026	0.091	0.07	0.035	0.023
137.6	0.1	0.08	0.038	0.03	0.091	0.07	0.035	0.023
137.8	0.101	0.079	0.038	0.032	0.091	0.07	0.035	0.023
138	0.097	0.074	0.035	0.027	0.091	0.071	0.035	0.023
138.2	0.095	0.07	0.039	0.026	0.091	0.071	0.035	0.023
138.4	0.099	0.074	0.042	0.031	0.091	0.071	0.035	0.023
138.6	0.102	0.076	0.041	0.03	0.091	0.071	0.035	0.023
138.8	0.1	0.07	0.037	0.025	0.091	0.071	0.035	0.023
139	0.096	0.064	0.036	0.022	0.091	0.071	0.035	0.023
139.2	0.096	0.067	0.038	0.022	0.092	0.071	0.035	0.023
139.4	0.101	0.072	0.039	0.024	0.092	0.071	0.035	0.023
139.6	0.103	0.075	0.038	0.026	0.092	0.071	0.035	0.023
139.8	0.101	0.073	0.037	0.024	0.092	0.071	0.035	0.023
140	0.095	0.069	0.034	0.02	0.092	0.071	0.035	0.023
140.2	0.094	0.07	0.037	0.022	0.092	0.071	0.035	0.023
140.4	0.096	0.076	0.039	0.026	0.092	0.071	0.035	0.024
140.6	0.1	0.079	0.038	0.026	0.092	0.072	0.035	0.024
140.8	0.099	0.074	0.036	0.026	0.092	0.072	0.035	0.024
141	0.094	0.072	0.035	0.024	0.092	0.072	0.036	0.024
141.2	0.097	0.076	0.038	0.027	0.093	0.072	0.036	0.024
141.4	0.103	0.081	0.041	0.032	0.093	0.072	0.036	0.024
141.6	0.106	0.083	0.04	0.035	0.093	0.072	0.036	0.024
141.8	0.103	0.078	0.038	0.03	0.093	0.072	0.036	0.024
142	0.099	0.072	0.038	0.029	0.093	0.072	0.036	0.024
142.2	0.101	0.073	0.042	0.032	0.093	0.072	0.036	0.024
142.4	0.105	0.078	0.042	0.032	0.093	0.072	0.036	0.024
142.6	0.107	0.077	0.04	0.029	0.093	0.072	0.036	0.024
142.8	0.104	0.072	0.037	0.027	0.093	0.072	0.036	0.024
143	0.101	0.07	0.036	0.024	0.093	0.073	0.036	0.024
143.2	0.103	0.074	0.038	0.024	0.094	0.073	0.036	0.024
143.4	0.107	0.08	0.04	0.029	0.094	0.073	0.036	0.024
143.6	0.106	0.079	0.037	0.027	0.094	0.073	0.036	0.024
143.8	0.1	0.073	0.034	0.022	0.094	0.073	0.036	0.024
144	0.096	0.071	0.035	0.022	0.094	0.073	0.036	0.024
144.2	0.096	0.074	0.037	0.024	0.094	0.073	0.036	0.024
144.4	0.099	0.078	0.036	0.025	0.094	0.073	0.036	0.024
144.6	0.102	0.077	0.036	0.026	0.094	0.073	0.036	0.024
144.8	0.098	0.073	0.034	0.025	0.094	0.073	0.036	0.024
145	0.095	0.071	0.035	0.022	0.094	0.073	0.036	0.024
145.2	0.098	0.074	0.038	0.027	0.095	0.073	0.036	0.024
145.4	0.103	0.077	0.04	0.031	0.095	0.073	0.036	0.024
145.6	0.102	0.072	0.036	0.026	0.095	0.074	0.036	0.024
145.8	0.096	0.063	0.035	0.021	0.095	0.074	0.036	0.024
146	0.093	0.06	0.036	0.022	0.095	0.074	0.036	0.024
146.2	0.096	0.065	0.039	0.023	0.095	0.074	0.037	0.024
146.4	0.099	0.068	0.038	0.022	0.095	0.074	0.037	0.024
146.6	0.1	0.066	0.037	0.022	0.095	0.074	0.037	0.024
146.8	0.096	0.064	0.035	0.02	0.095	0.074	0.037	0.024
147	0.095	0.066	0.036	0.018	0.095	0.074	0.037	0.024
147.2	0.1	0.074	0.039	0.025	0.096	0.074	0.037	0.024
147.4	0.102	0.079	0.04	0.027	0.096	0.074	0.037	0.024
147.6	0.099	0.075	0.036	0.023	0.096	0.074	0.037	0.024
147.8	0.096	0.072	0.036	0.022	0.096	0.074	0.037	0.025
148	0.095	0.076	0.038	0.025	0.096	0.074	0.037	0.025
148.2	0.101	0.083	0.04	0.028	0.096	0.075	0.037	0.025
148.4	0.108	0.087	0.041	0.032	0.096	0.075	0.037	0.025
148.6	0.108	0.087	0.04	0.034	0.096	0.075	0.037	0.025
148.8	0.104	0.082	0.039	0.03	0.096	0.075	0.037	0.025
149	0.104	0.08	0.041	0.03	0.096	0.075	0.037	0.025
149.2	0.108	0.085	0.044	0.035	0.097	0.075	0.037	0.025
149.4	0.111	0.084	0.041	0.033	0.097	0.075	0.037	0.025
149.6	0.105	0.074	0.038	0.027	0.097	0.075	0.037	0.025
149.8	0.1	0.069	0.037	0.026	0.097	0.075	0.037	0.025
150	0.101	0.072	0.039	0.027	0.097	0.075	0.037	0.025
150.2	0.106	0.077	0.04	0.028	0.097	0.075	0.037	0.025
150.4	0.107	0.077	0.038	0.03	0.097	0.075	0.037	0.025
150.6	0.104	0.074	0.036	0.027	0.097	0.075	0.037	0.025
150.8	0.1	0.073	0.035	0.024	0.097	0.076	0.037	0.025
151	0.102	0.076	0.038	0.028	0.097	0.076	0.037	0.025
151.2	0.104	0.082	0.039	0.031	0.098	0.076	0.037	0.025
151.4	0.104	0.081	0.037	0.029	0.098	0.076	0.038	0.025
151.6	0.101	0.076	0.035	0.027	0.098	0.076	0.038	0.025
151.8	0.097	0.075	0.035	0.027	0.098	0.076	0.038	0.025
152	0.1	0.08	0.038	0.028	0.098	0.076	0.038	0.025
152.2	0.108	0.086	0.041	0.034	0.098	0.076	0.038	0.025
152.4	0.11	0.086	0.04	0.035	0.098	0.076	0.038	0.025
152.6	0.105	0.08	0.038	0.03	0.098	0.076	0.038	0.025
152.8	0.101	0.075	0.039	0.028	0.098	0.076	0.038	0.025
153	0.103	0.077	0.042	0.031	0.098	0.076	0.038	0.025
153.2	0.107	0.08	0.042	0.031	0.099	0.076	0.038	0.025
153.4	0.106	0.076	0.039	0.027	0.099	0.077	0.038	0.025
153.6	0.102	0.07	0.037	0.025	0.099	0.077	0.038	0.025
153.8	0.101	0.071	0.038	0.024	0.099	0.077	0.038	0.025
154	0.105	0.078	0.04	0.026	0.099	0.077	0.038	0.025
154.2	0.11	0.082	0.041	0.029	0.099	0.077	0.038	0.025
154.4	0.108	0.081	0.039	0.027	0.099	0.077	0.038	0.025
154.6	0.103	0.077	0.038	0.023	0.099	0.077	0.038	0.025
154.8	0.102	0.078	0.04	0.026	0.099	0.077	0.038	0.025
155	0.104	0.085	0.043	0.03	0.099	0.077	0.038	0.025
155.2	0.108	0.089	0.042	0.03	0.099	0.077	0.038	0.025
155.4	0.11	0.087	0.04	0.031	0.1	0.077	0.038	0.026
155.6	0.105	0.084	0.039	0.03	0.1	0.077	0.038	0.026
155.8	0.106	0.086	0.041	0.03	0.1	0.077	0.038	0.026
156	0.113	0.091	0.044	0.035	0.1	0.078	0.038	0.026
156.2	0.116	0.094	0.045	0.038	0.1	0.078	0.038	0.026
156.4	0.112	0.087	0.041	0.032	0.1	0.078	0.038	0.026
156.6	0.106	0.078	0.04	0.028	0.1	0.078	0.039	0.026
156.8	0.105	0.078	0.043	0.03	0.1	0.078	0.039	0.026
157	0.11	0.082	0.044	0.031	0.1	0.078	0.039	0.026
157.2	0.11	0.079	0.041	0.029	0.1	0.078	0.039	0.026
157.4	0.106	0.073	0.039	0.026	0.101	0.078	0.039	0.026
157.6	0.103	0.073	0.038	0.024	0.101	0.078	0.039	0.026
157.8	0.106	0.077	0.041	0.025	0.101	0.078	0.039	0.026
158	0.11	0.082	0.043	0.03	0.101	0.078	0.039	0.026
158.2	0.11	0.082	0.041	0.029	0.101	0.078	0.039	0.026
158.4	0.104	0.077	0.038	0.024	0.101	0.078	0.039	0.026
158.6	0.101	0.075	0.039	0.024	0.101	0.078	0.039	0.026
158.8	0.102	0.08	0.042	0.028	0.101	0.079	0.039	0.026
159	0.107	0.087	0.042	0.03	0.101	0.079	0.039	0.026
159.2	0.11	0.087	0.041	0.033	0.101	0.079	0.039	0.026
159.4	0.107	0.084	0.04	0.032	0.102	0.079	0.039	0.026
159.6	0.105	0.083	0.04	0.031	0.102	0.079	0.039	0.026
159.8	0.11	0.087	0.045	0.035	0.102	0.079	0.039	0.026
160	0.114	0.09	0.045	0.038	0.102	0.079	0.039	0.026
160.2	0.112	0.085	0.043	0.034	0.102	0.079	0.039	0.026
160.4	0.105	0.076	0.04	0.029	0.102	0.079	0.039	0.026
160.6	0.102	0.072	0.042	0.029	0.102	0.079	0.039	0.026
160.8	0.107	0.078	0.044	0.03	0.102	0.079	0.039	0.026
161	0.11	0.079	0.042	0.029	0.102	0.079	0.039	0.026
161.2	0.108	0.075	0.041	0.028	0.102	0.079	0.039	0.026
161.4	0.105	0.074	0.041	0.025	0.102	0.08	0.039	0.026
161.6	0.105	0.076	0.043	0.025	0.103	0.08	0.039	0.026
161.8	0.11	0.084	0.047	0.031	0.103	0.08	0.039	0.026
162	0.111	0.087	0.046	0.031	0.103	0.08	0.04	0.026
162.2	0.108	0.084	0.045	0.027	0.103	0.08	0.04	0.026
162.4	0.104	0.081	0.045	0.027	0.103	0.08	0.04	0.026
162.6	0.103	0.084	0.048	0.029	0.103	0.08	0.04	0.026
162.8	0.108	0.092	0.049	0.033	0.103	0.08	0.04	0.026
163	0.113	0.094	0.049	0.035	0.103	0.08	0.04	0.026
163.2	0.111	0.091	0.047	0.035	0.103	0.08	0.04	0.027
163.4	0.108	0.089	0.048	0.033	0.103	0.08	0.04	0.027
163.6	0.11	0.09	0.05	0.035	0.103	0.08	0.04	0.027
163.8	0.116	0.095	0.053	0.04	0.104	0.08	0.04	0.027
164	0.116	0.092	0.049	0.036	0.104	0.08	0.04	0.027
164.2	0.11	0.082	0.044	0.03	0.104	0.081	0.04	0.027
164.4	0.106	0.076	0.044	0.028	0.104	0.081	0.04	0.027
164.6	0.109	0.08	0.046	0.029	0.104	0.081	0.04	0.027
164.8	0.114	0.084	0.044	0.029	0.104	0.081	0.04	0.027
165	0.115	0.083	0.042	0.03	0.104	0.081	0.04	0.027
165.2	0.111	0.079	0.041	0.027	0.104	0.081	0.04	0.027
165.4	0.108	0.076	0.042	0.024	0.104	0.081	0.04	0.027
165.6	0.111	0.081	0.045	0.028	0.104	0.081	0.04	0.027
165.8	0.114	0.09	0.046	0.032	0.105	0.081	0.04	0.027
166	0.112	0.088	0.043	0.029	0.105	0.081	0.04	0.027
166.2	0.108	0.083	0.042	0.028	0.105	0.081	0.04	0.027
166.4	0.105	0.084	0.042	0.028	0.105	0.081	0.04	0.027
166.6	0.11	0.091	0.045	0.032	0.105	0.081	0.04	0.027
166.8	0.117	0.095	0.047	0.036	0.105	0.081	0.04	0.027
167	0.116	0.094	0.045	0.036	0.105	0.082	0.04	0.027
167.2	0.113	0.091	0.044	0.033	0.105	0.082	0.04	0.027
167.4	0.113	0.089	0.047	0.034	0.105	0.082	0.041	0.027
167.6	0.117	0.093	0.05	0.039	0.105	0.082	0.041	0.027
167.8	0.119	0.095	0.049	0.037	0.105	0.082	0.041	0.027
168	0.114	0.085	0.043	0.031	0.106	0.082	0.041	0.027
168.2	0.109	0.078	0.042	0.028	0.106	0.082	0.041	0.027
168.4	0.111	0.081	0.045	0.029	0.106	0.082	0.041	0.027
168.6	0.116	0.086	0.047	0.031	0.106	0.082	0.041	0.027
168.8	0.118	0.087	0.045	0.032	0.106	0.082	0.041	0.027
169	0.114	0.084	0.045	0.029	0.106	0.082	0.041	0.027
169.2	0.11	0.08	0.044	0.026	0.106	0.082	0.041	0.027
169.4	0.111	0.083	0.047	0.029	0.106	0.082	0.041	0.027
169.6	0.113	0.089	0.047	0.031	0.106	0.083	0.041	0.027
169.8	0.114	0.088	0.045	0.03	0.106	0.083	0.041	0.027
170	0.11	0.083	0.042	0.029	0.106	0.083	0.041	0.027
170.2	0.106	0.083	0.043	0.028	0.107	0.083	0.041	0.027
170.4	0.109	0.087	0.044	0.029	0.107	0.083	0.041	0.027
170.6	0.116	0.093	0.047	0.035	0.107	0.083	0.041	0.027
170.8	0.119	0.094	0.046	0.036	0.107	0.083	0.041	0.027
171	0.113	0.087	0.042	0.03	0.107	0.083	0.041	0.027
171.2	0.11	0.082	0.043	0.029	0.107	0.083	0.041	0.028
171.4	0.112	0.085	0.046	0.033	0.107	0.083	0.041	0.028
171.6	0.115	0.087	0.044	0.032	0.107	0.083	0.041	0.028
171.8	0.112	0.08	0.039	0.027	0.107	0.083	0.041	0.028
172	0.106	0.073	0.037	0.024	0.107	0.083	0.041	0.028
172.2	0.106	0.075	0.039	0.024	0.107	0.083	0.041	0.028
172.4	0.11	0.079	0.041	0.025	0.108	0.084	0.041	0.028
172.6	0.114	0.085	0.043	0.029	0.108	0.084	0.041	0.028
172.8	0.112	0.083	0.041	0.027	0.108	0.084	0.042	0.028
173	0.107	0.079	0.041	0.023	0.108	0.084	0.042	0.028
173.2	0.107	0.081	0.043	0.026	0.108	0.084	0.042	0.028
173.4	0.109	0.087	0.045	0.03	0.108	0.084	0.042	0.028
173.6	0.112	0.089	0.044	0.031	0.108	0.084	0.042	0.028
173.8	0.113	0.085	0.043	0.031	0.108	0.084	0.042	0.028
174	0.108	0.084	0.042	0.03	0.108	0.084	0.042	0.028
174.2	0.111	0.089	0.045	0.032	0.108	0.084	0.042	0.028
174.4	0.118	0.094	0.049	0.037	0.108	0.084	0.042	0.028
174.6	0.122	0.096	0.049	0.04	0.109	0.084	0.042	0.028
174.8	0.118	0.09	0.045	0.035	0.109	0.084	0.042	0.028
175	0.111	0.082	0.044	0.031	0.109	0.084	0.042	0.028
175.2	0.112	0.084	0.047	0.034	0.109	0.084	0.042	0.028
175.4	0.116	0.087	0.046	0.034	0.109	0.085	0.042	0.028
175.6	0.116	0.083	0.041	0.029	0.109	0.085	0.042	0.028
175.8	0.111	0.077	0.038	0.027	0.109	0.085	0.042	0.028
176	0.109	0.076	0.039	0.024	0.109	0.085	0.042	0.028
176.2	0.111	0.08	0.041	0.025	0.109	0.085	0.042	0.028
176.4	0.115	0.085	0.043	0.028	0.109	0.085	0.042	0.028
176.6	0.114	0.086	0.043	0.028	0.109	0.085	0.042	0.028
176.8	0.108	0.079	0.04	0.022	0.11	0.085	0.042	0.028
177	0.104	0.078	0.042	0.024	0.11	0.085	0.042	0.028
177.2	0.106	0.084	0.044	0.027	0.11	0.085	0.042	0.028
177.4	0.11	0.087	0.044	0.029	0.11	0.085	0.042	0.028
177.6	0.113	0.086	0.043	0.03	0.11	0.085	0.042	0.028
177.8	0.109	0.084	0.041	0.029	0.11	0.085	0.042	0.028
178	0.108	0.084	0.043	0.028	0.11	0.085	0.042	0.028
178.2	0.114	0.091	0.047	0.034	0.11	0.086	0.042	0.028
178.4	0.119	0.095	0.048	0.038	0.11	0.086	0.042	0.028
178.6	0.116	0.09	0.045	0.034	0.11	0.086	0.043	0.028
178.8	0.11	0.081	0.042	0.029	0.11	0.086	0.043	0.028
179	0.108	0.08	0.045	0.03	0.111	0.086	0.043	0.028
179.2	0.113	0.086	0.047	0.031	0.111	0.086	0.043	0.028
179.4	0.115	0.086	0.043	0.03	0.111	0.086	0.043	0.029
179.6	0.115	0.084	0.043	0.029	0.111	0.086	0.043	0.029
179.8	0.112	0.081	0.043	0.026	0.111	0.086	0.043	0.029
180	0.111	0.08	0.044	0.024	0.111	0.086	0.043	0.029
180.2	0.114	0.087	0.048	0.028	0.111	0.086	0.043	0.029
180.4	0.115	0.089	0.048	0.029	0.111	0.086	0.043	0.029
180.6	0.111	0.082	0.045	0.024	0.111	0.086	0.043	0.029
180.8	0.107	0.079	0.046	0.024	0.111	0.086	0.043	0.029
181	0.106	0.085	0.049	0.027	0.111	0.087	0.043	0.029
181.2	0.112	0.092	0.051	0.03	0.112	0.087	0.043	0.029
181.4	0.116	0.093	0.05	0.033	0.112	0.087	0.043	0.029
181.6	0.113	0.093	0.049	0.032	0.112	0.087	0.043	0.029
181.8	0.111	0.092	0.048	0.03	0.112	0.087	0.043	0.029
182	0.113	0.094	0.052	0.033	0.112	0.087	0.043	0.029
182.2	0.119	0.1	0.054	0.039	0.112	0.087	0.043	0.029
182.4	0.12	0.099	0.051	0.037	0.112	0.087	0.043	0.029
182.6	0.115	0.09	0.046	0.031	0.112	0.087	0.043	0.029
182.8	0.11	0.084	0.045	0.029	0.112	0.087	0.043	0.029
183	0.113	0.089	0.048	0.031	0.112	0.087	0.043	0.029
183.2	0.118	0.092	0.046	0.031	0.112	0.087	0.043	0.029
183.4	0.12	0.092	0.044	0.032	0.113	0.087	0.043	0.029
183.6	0.117	0.088	0.044	0.029	0.113	0.087	0.043	0.029
183.8	0.113	0.082	0.043	0.025	0.113	0.087	0.043	0.029
184	0.114	0.086	0.047	0.029	0.113	0.088	0.043	0.029
184.2	0.118	0.091	0.048	0.031	0.113	0.088	0.044	0.029
184.4	0.115	0.089	0.046	0.027	0.113	0.088	0.044	0.029
184.6	0.111	0.083	0.045	0.026	0.113	0.088	0.044	0.029
184.8	0.107	0.087	0.047	0.027	0.113	0.088	0.044	0.029
185	0.11	0.093	0.049	0.03	0.113	0.088	0.044	0.029
185.2	0.117	0.099	0.051	0.035	0.113	0.088	0.044	0.029
185.4	0.118	0.098	0.049	0.036	0.113	0.088	0.044	0.029
185.6	0.113	0.093	0.047	0.031	0.113	0.088	0.044	0.029
185.8	0.111	0.09	0.048	0.031	0.114	0.088	0.044	0.029
186	0.115	0.094	0.051	0.036	0.114	0.088	0.044	0.029
186.2	0.119	0.096	0.049	0.035	0.114	0.088	0.044	0.029
186.4	0.117	0.089	0.044	0.03	0.114	0.088	0.044	0.029
186.6	0.112	0.082	0.04	0.027	0.114	0.088	0.044	0.029
186.8	0.111	0.082	0.042	0.026	0.114	0.088	0.044	0.029
187	0.115	0.086	0.041	0.027	0.114	0.089	0.044	0.029
187.2	0.118	0.088	0.041	0.029	0.114	0.089	0.044	0.029
187.4	0.116	0.085	0.04	0.027	0.114	0.089	0.044	0.029
187.6	0.111	0.078	0.039	0.022	0.114	0.089	0.044	0.03
187.8	0.11	0.079	0.042	0.024	0.114	0.089	0.044	0.03
188	0.112	0.088	0.046	0.028	0.115	0.089	0.044	0.03
188.2	0.115	0.089	0.045	0.028	0.115	0.089	0.044	0.03
188.4	0.112	0.086	0.044	0.028	0.115	0.089	0.044	0.03
188.6	0.109	0.087	0.046	0.028	0.115	0.089	0.044	0.03
188.8	0.112	0.094	0.051	0.031	0.115	0.089	0.044	0.03
189	0.119	0.099	0.054	0.036	0.115	0.089	0.044	0.03
189.2	0.123	0.104	0.055	0.04	0.115	0.089	0.044	0.03
189.4	0.12	0.098	0.051	0.036	0.115	0.089	0.044	0.03
189.6	0.114	0.091	0.05	0.032	0.115	0.089	0.044	0.03
189.8	0.116	0.093	0.052	0.035	0.115	0.09	0.044	0.03
190	0.121	0.098	0.052	0.036	0.115	0.09	0.044	0.03
190.2	0.12	0.093	0.047	0.033	0.115	0.09	0.045	0.03
190.4	0.116	0.087	0.044	0.029	0.116	0.09	0.045	0.03
190.6	0.114	0.085	0.044	0.027	0.116	0.09	0.045	0.03
190.8	0.116	0.089	0.046	0.028	0.116	0.09	0.045	0.03
191	0.121	0.093	0.047	0.032	0.116	0.09	0.045	0.03
191.2	0.121	0.094	0.048	0.031	0.116	0.09	0.045	0.03
191.4	0.116	0.087	0.045	0.027	0.116	0.09	0.045	0.03
191.6	0.112	0.084	0.046	0.026	0.116	0.09	0.045	0.03
191.8	0.112	0.092	0.049	0.029	0.116	0.09	0.045	0.03
192	0.117	0.097	0.05	0.032	0.116	0.09	0.045	0.03
192.2	0.121	0.096	0.05	0.034	0.116	0.09	0.045	0.03
192.4	0.117	0.096	0.049	0.033	0.116	0.09	0.045	0.03
192.6	0.117	0.099	0.051	0.033	0.116	0.09	0.045	0.03
192.8	0.123	0.105	0.056	0.039	0.117	0.091	0.045	0.03
193	0.127	0.109	0.056	0.043	0.117	0.091	0.045	0.03
193.2	0.126	0.106	0.053	0.039	0.117	0.091	0.045	0.03
193.4	0.12	0.097	0.049	0.035	0.117	0.091	0.045	0.03
193.6	0.118	0.094	0.05	0.035	0.117	0.091	0.045	0.03
193.8	0.121	0.098	0.051	0.036	0.117	0.091	0.045	0.03
194	0.126	0.1	0.051	0.037	0.117	0.091	0.045	0.03
194.2	0.123	0.095	0.047	0.035	0.117	0.091	0.045	0.03
194.4	0.118	0.091	0.046	0.03	0.117	0.091	0.045	0.03
194.6	0.118	0.09	0.047	0.029	0.117	0.091	0.045	0.03
194.8	0.121	0.096	0.05	0.033	0.117	0.091	0.045	0.03
195	0.122	0.098	0.049	0.033	0.118	0.091	0.045	0.03
195.2	0.118	0.09	0.046	0.028	0.118	0.091	0.045	0.03
195.4	0.113	0.085	0.044	0.026	0.118	0.091	0.045	0.03
195.6	0.111	0.089	0.046	0.027	0.118	0.091	0.045	0.03
195.8	0.116	0.095	0.047	0.029	0.118	0.091	0.045	0.03
196	0.122	0.097	0.047	0.032	0.118	0.092	0.046	0.03
196.2	0.12	0.097	0.044	0.032	0.118	0.092	0.046	0.031
196.4	0.116	0.094	0.044	0.028	0.118	0.092	0.046	0.031
196.6	0.118	0.095	0.047	0.03	0.118	0.092	0.046	0.031
196.8	0.123	0.102	0.05	0.036	0.118	0.092	0.046	0.031
197	0.124	0.1	0.046	0.033	0.118	0.092	0.046	0.031
197.2	0.12	0.092	0.042	0.029	0.118	0.092	0.046	0.031
197.4	0.116	0.087	0.042	0.028	0.119	0.092	0.046	0.031
197.6	0.119	0.091	0.045	0.029	0.119	0.092	0.046	0.031
197.8	0.126	0.096	0.046	0.032	0.119	0.092	0.046	0.031
198	0.127	0.095	0.045	0.033	0.119	0.092	0.046	0.031
198.2	0.121	0.089	0.042	0.028	0.119	0.092	0.046	0.031
198.4	0.116	0.085	0.042	0.025	0.119	0.092	0.046	0.031
198.6	0.118	0.09	0.046	0.029	0.119	0.092	0.046	0.031
198.8	0.12	0.097	0.048	0.032	0.119	0.092	0.046	0.031
199	0.119	0.093	0.045	0.029	0.119	0.093	0.046	0.031
199.2	0.116	0.088	0.044	0.028	0.119	0.093	0.046	0.031
199.4	0.114	0.092	0.046	0.029	0.119	0.093	0.046	0.031
199.6	0.118	0.1	0.049	0.033	0.119	0.093	0.046	0.031
199.8	0.126	0.106	0.051	0.038	0.12	0.093	0.046	0.031
200	0.128	0.109	0.051	0.04	0.12	0.093	0.046	0.031
200.2	0.125	0.105	0.049	0.037	0.12	0.093	0.046	0.031
200.4	0.123	0.103	0.051	0.037	0.12	0.093	0.046	0.031
200.6	0.125	0.107	0.055	0.041	0.12	0.093	0.046	0.031
200.8	0.129	0.11	0.054	0.041	0.12	0.093	0.046	0.031
201	0.128	0.103	0.05	0.038	0.12	0.093	0.046	0.031
201.2	0.124	0.097	0.049	0.036	0.12	0.093	0.046	0.031
201.4	0.123	0.097	0.05	0.035	0.12	0.093	0.046	0.031
201.6	0.127	0.101	0.051	0.036	0.12	0.093	0.046	0.031
201.8	0.132	0.103	0.051	0.039	0.12	0.093	0.046	0.031
202	0.126	0.097	0.048	0.033	0.12	0.094	0.046	0.031
202.2	0.121	0.092	0.047	0.029	0.121	0.094	0.047	0.031
202.4	0.12	0.093	0.05	0.031	0.121	0.094	0.047	0.031
202.6	0.123	0.1	0.052	0.034	0.121	0.094	0.047	0.031
202.8	0.124	0.1	0.051	0.032	0.121	0.094	0.047	0.031
203	0.121	0.095	0.048	0.031	0.121	0.094	0.047	0.031
203.2	0.116	0.096	0.047	0.03	0.121	0.094	0.047	0.031
203.4	0.117	0.1	0.049	0.031	0.121	0.094	0.047	0.031
203.6	0.124	0.108	0.053	0.037	0.121	0.094	0.047	0.031
203.8	0.128	0.111	0.053	0.04	0.121	0.094	0.047	0.031
204	0.124	0.106	0.049	0.035	0.121	0.094	0.047	0.031
204.2	0.119	0.098	0.049	0.031	0.121	0.094	0.047	0.031
204.4	0.119	0.099	0.052	0.035	0.121	0.094	0.047	0.031
204.6	0.123	0.102	0.051	0.036	0.121	0.094	0.047	0.031
204.8	0.124	0.099	0.046	0.033	0.122	0.094	0.047	0.032
205	0.12	0.092	0.044	0.032	0.122	0.094	0.047	0.032
205.2	0.117	0.09	0.044	0.028	0.122	0.095	0.047	0.032
205.4	0.119	0.091	0.045	0.028	0.122	0.095	0.047	0.032
205.6	0.124	0.096	0.048	0.033	0.122	0.095	0.047	0.032
205.8	0.125	0.095	0.047	0.032	0.122	0.095	0.047	0.032
206	0.12	0.088	0.045	0.027	0.122	0.095	0.047	0.032
206.2	0.117	0.086	0.046	0.027	0.122	0.095	0.047	0.032
206.4	0.121	0.094	0.05	0.031	0.122	0.095	0.047	0.032
206.6	0.124	0.098	0.049	0.032	0.122	0.095	0.047	0.032
206.8	0.125	0.098	0.049	0.033	0.122	0.095	0.047	0.032
207	0.121	0.097	0.048	0.033	0.122	0.095	0.047	0.032
207.2	0.119	0.098	0.049	0.032	0.123	0.095	0.047	0.032
207.4	0.123	0.102	0.053	0.036	0.123	0.095	0.047	0.032
207.6	0.127	0.108	0.054	0.042	0.123	0.095	0.047	0.032
207.8	0.125	0.104	0.051	0.037	0.123	0.095	0.047	0.032
208	0.118	0.095	0.048	0.033	0.123	0.095	0.047	0.032
208.2	0.116	0.093	0.049	0.033	0.123	0.095	0.047	0.032
208.4	0.12	0.098	0.05	0.035	0.123	0.096	0.048	0.032
208.6	0.124	0.099	0.048	0.035	0.123	0.096	0.048	0.032
208.8	0.122	0.094	0.045	0.033	0.123	0.096	0.048	0.032
209	0.118	0.091	0.045	0.029	0.123	0.096	0.048	0.032
209.2	0.117	0.09	0.046	0.027	0.123	0.096	0.048	0.032
209.4	0.12	0.094	0.048	0.031	0.123	0.096	0.048	0.032
209.6	0.124	0.099	0.05	0.032	0.124	0.096	0.048	0.032
209.8	0.123	0.093	0.047	0.028	0.124	0.096	0.048	0.032
210	0.118	0.089	0.047	0.027	0.124	0.096	0.048	0.032
210.2	0.119	0.094	0.049	0.029	0.124	0.096	0.048	0.032
210.4	0.124	0.101	0.051	0.031	0.124	0.096	0.048	0.032
210.6	0.127	0.105	0.052	0.035	0.124	0.096	0.048	0.032
210.8	0.126	0.104	0.051	0.035	0.124	0.096	0.048	0.032
211	0.121	0.1	0.05	0.032	0.124	0.096	0.048	0.032
211.2	0.12	0.101	0.052	0.033	0.124	0.096	0.048	0.032
211.4	0.124	0.106	0.055	0.039	0.124	0.096	0.048	0.032
211.6	0.125	0.107	0.053	0.038	0.124	0.097	0.048	0.032
211.8	0.122	0.099	0.05	0.034	0.124	0.097	0.048	0.032
212	0.117	0.094	0.049	0.033	0.124	0.097	0.048	0.032
212.2	0.119	0.097	0.05	0.033	0.125	0.097	0.048	0.032
212.4	0.126	0.102	0.05	0.036	0.125	0.097	0.048	0.032
212.6	0.128	0.101	0.049	0.036	0.125	0.097	0.048	0.032
212.8	0.122	0.093	0.044	0.03	0.125	0.097	0.048	0.032
213	0.117	0.087	0.044	0.025	0.125	0.097	0.048	0.032
213.2	0.119	0.089	0.046	0.028	0.125	0.097	0.048	0.032
213.4	0.12	0.094	0.046	0.03	0.125	0.097	0.048	0.032
213.6	0.121	0.091	0.044	0.027	0.125	0.097	0.048	0.032
213.8	0.117	0.085	0.042	0.025	0.125	0.097	0.048	0.033
214	0.113	0.088	0.042	0.025	0.125	0.097	0.048	0.033
214.2	0.118	0.094	0.046	0.027	0.125	0.097	0.048	0.033
214.4	0.123	0.099	0.047	0.031	0.125	0.097	0.048	0.033
214.6	0.126	0.102	0.047	0.034	0.126	0.097	0.049	0.033
214.8	0.121	0.096	0.045	0.029	0.126	0.098	0.049	0.033
215	0.118	0.094	0.047	0.029	0.126	0.098	0.049	0.033
215.2	0.121	0.099	0.051	0.034	0.126	0.098	0.049	0.033
215.4	0.126	0.101	0.051	0.035	0.126	0.098	0.049	0.033
215.6	0.126	0.097	0.047	0.033	0.126	0.098	0.049	0.033
215.8	0.122	0.09	0.045	0.031	0.126	0.098	0.049	0.033
216	0.121	0.09	0.045	0.029	0.126	0.098	0.049	0.033
216.2	0.128	0.097	0.048	0.033	0.126	0.098	0.049	0.033
216.4	0.13	0.098	0.048	0.035	0.126	0.098	0.049	0.033
216.6	0.126	0.093	0.045	0.03	0.126	0.098	0.049	0.033
216.8	0.119	0.084	0.041	0.024	0.126	0.098	0.049	0.033
217	0.116	0.083	0.044	0.025	0.126	0.098	0.049	0.033
217.2	0.118	0.089	0.045	0.026	0.127	0.098	0.049	0.033
217.4	0.118	0.088	0.043	0.024	0.127	0.098	0.049	0.033
217.6	0.116	0.085	0.041	0.023	0.127	0.098	0.049	0.033
217.8	0.11	0.086	0.042	0.022	0.127	0.098	0.049	0.033
218	0.111	0.091	0.044	0.023	0.127	0.099	0.049	0.033
218.2	0.119	0.098	0.049	0.029	0.127	0.099	0.049	0.033
218.4	0.123	0.102	0.048	0.033	0.127	0.099	0.049	0.033
218.6	0.12	0.099	0.047	0.03	0.127	0.099	0.049	0.033
218.8	0.116	0.093	0.046	0.027	0.127	0.099	0.049	0.033
219	0.118	0.097	0.051	0.032	0.127	0.099	0.049	0.033
219.2	0.124	0.101	0.051	0.033	0.127	0.099	0.049	0.033
219.4	0.128	0.102	0.05	0.035	0.127	0.099	0.049	0.033
219.6	0.127	0.098	0.047	0.034	0.127	0.099	0.049	0.033
219.8	0.124	0.096	0.047	0.03	0.128	0.099	0.049	0.033
220	0.129	0.1	0.05	0.033	0.128	0.099	0.049	0.033
220.2	0.133	0.105	0.052	0.038	0.128	0.099	0.049	0.033
220.4	0.131	0.102	0.049	0.034	0.128	0.099	0.049	0.033
220.6	0.127	0.095	0.046	0.029	0.128	0.099	0.049	0.033
220.8	0.121	0.09	0.045	0.027	0.128	0.099	0.049	0.033
221	0.123	0.096	0.047	0.029	0.128	0.099	0.049	0.033
221.2	0.125	0.098	0.045	0.028	0.128	0.099	0.05	0.033
221.4	0.125	0.097	0.045	0.03	0.128	0.1	0.05	0.033
221.6	0.121	0.097	0.043	0.028	0.128	0.1	0.05	0.033
221.8	0.117	0.096	0.044	0.026	0.128	0.1	0.05	0.033
222	0.12	0.1	0.048	0.031	0.128	0.1	0.05	0.033
222.2	0.125	0.106	0.05	0.036	0.128	0.1	0.05	0.033
222.4	0.123	0.102	0.046	0.032	0.129	0.1	0.05	0.033
222.6	0.116	0.094	0.045	0.027	0.129	0.1	0.05	0.033
222.8	0.114	0.092	0.047	0.029	0.129	0.1	0.05	0.033
223	0.119	0.098	0.049	0.031	0.129	0.1	0.05	0.034
223.2	0.125	0.102	0.049	0.033	0.129	0.1	0.05	0.034
223.4	0.127	0.101	0.049	0.034	0.129	0.1	0.05	0.034
223.6	0.122	0.095	0.047	0.029	0.129	0.1	0.05	0.034
223.8	0.123	0.095	0.049	0.029	0.129	0.1	0.05	0.034
224	0.127	0.101	0.051	0.034	0.129	0.1	0.05	0.034
224.2	0.127	0.101	0.05	0.033	0.129	0.1	0.05	0.034
224.4	0.124	0.093	0.046	0.028	0.129	0.1	0.05	0.034
224.6	0.118	0.087	0.044	0.025	0.129	0.1	0.05	0.034
224.8	0.118	0.092	0.046	0.026	0.129	0.101	0.05	0.034
225	0.123	0.098	0.047	0.029	0.13	0.101	0.05	0.034
225.2	0.124	0.098	0.045	0.03	0.13	0.101	0.05	0.034
225.4	0.122	0.097	0.045	0.03	0.13	0.101	0.05	0.034
225.6	0.117	0.095	0.044	0.027	0.13	0.101	0.05	0.034
225.8	0.118	0.097	0.047	0.03	0.13	0.101	0.05	0.034
226	0.121	0.103	0.05	0.034	0.13	0.101	0.05	0.034
226.2	0.124	0.104	0.048	0.034	0.13	0.101	0.05	0.034
226.4	0.119	0.096	0.046	0.031	0.13	0.101	0.05	0.034
226.6	0.117	0.094	0.048	0.032	0.13	0.101	0.05	0.034
226.8	0.123	0.101	0.052	0.035	0.13	0.101	0.05	0.034
227	0.132	0.107	0.054	0.04	0.13	0.101	0.05	0.034
227.2	0.135	0.107	0.053	0.042	0.13	0.101	0.05	0.034
227.4	0.131	0.102	0.051	0.037	0.13	0.101	0.05	0.034
227.6	0.131	0.101	0.053	0.037	0.131	0.101	0.05	0.034
227.8	0.135	0.106	0.056	0.041	0.131	0.101	0.051	0.034
228	0.136	0.107	0.054	0.04	0.131	0.101	0.051	0.034
228.2	0.133	0.099	0.051	0.034	0.131	0.102	0.051	0.034
228.4	0.127	0.093	0.049	0.031	0.131	0.102	0.051	0.034
228.6	0.125	0.096	0.049	0.03	0.131	0.102	0.051	0.034
228.8	0.129	0.102	0.05	0.031	0.131	0.102	0.051	0.034
229	0.131	0.103	0.049	0.033	0.131	0.102	0.051	0.034
229.2	0.127	0.102	0.046	0.032	0.131	0.102	0.051	0.034
229.4	0.121	0.098	0.045	0.027	0.131	0.102	0.051	0.034
229.6	0.12	0.1	0.048	0.029	0.131	0.102	0.051	0.034
229.8	0.124	0.105	0.05	0.034	0.131	0.102	0.051	0.034
230	0.124	0.104	0.047	0.031	0.131	0.102	0.051	0.034
230.2	0.121	0.096	0.045	0.029	0.132	0.102	0.051	0.034
230.4	0.117	0.092	0.045	0.028	0.132	0.102	0.051	0.034
230.6	0.12	0.096	0.049	0.029	0.132	0.102	0.051	0.034
230.8	0.128	0.103	0.051	0.034	0.132	0.102	0.051	0.034
231	0.132	0.103	0.051	0.036	0.132	0.102	0.051	0.034
231.2	0.127	0.098	0.048	0.03	0.132	0.102	0.051	0.034
231.4	0.126	0.095	0.049	0.029	0.132	0.102	0.051	0.034
231.6	0.129	0.1	0.053	0.033	0.132	0.103	0.051	0.034
231.8	0.131	0.103	0.052	0.034	0.132	0.103	0.051	0.034
232	0.13	0.099	0.049	0.03	0.132	0.103	0.051	0.034
232.2	0.125	0.092	0.047	0.027	0.132	0.103	0.051	0.034
232.4	0.123	0.096	0.048	0.028	0.132	0.103	0.051	0.034
232.6	0.127	0.102	0.049	0.03	0.132	0.103	0.051	0.035
232.8	0.131	0.106	0.05	0.034	0.132	0.103	0.051	0.035
233	0.13	0.106	0.05	0.035	0.133	0.103	0.051	0.035
233.2	0.124	0.101	0.046	0.031	0.133	0.103	0.051	0.035
233.4	0.122	0.101	0.049	0.032	0.133	0.103	0.051	0.035
233.6	0.126	0.105	0.051	0.037	0.133	0.103	0.051	0.035
233.8	0.127	0.105	0.048	0.035	0.133	0.103	0.051	0.035
234	0.124	0.098	0.044	0.031	0.133	0.103	0.051	0.035
234.2	0.119	0.091	0.043	0.029	0.133	0.103	0.051	0.035
234.4	0.12	0.094	0.045	0.029	0.133	0.103	0.051	0.035
234.6	0.127	0.101	0.048	0.033	0.133	0.103	0.052	0.035
234.8	0.13	0.101	0.047	0.035	0.133	0.103	0.052	0.035
235	0.126	0.096	0.044	0.031	0.133	0.104	0.052	0.035
235.2	0.122	0.09	0.044	0.027	0.133	0.104	0.052	0.035
235.4	0.122	0.092	0.048	0.03	0.133	0.104	0.052	0.035
235.6	0.125	0.099	0.049	0.032	0.134	0.104	0.052	0.035
235.8	0.127	0.098	0.048	0.03	0.134	0.104	0.052	0.035
236	0.124	0.094	0.046	0.028	0.134	0.104	0.052	0.035
236.2	0.12	0.095	0.048	0.027	0.134	0.104	0.052	0.035
236.4	0.123	0.102	0.051	0.03	0.134	0.104	0.052	0.035
236.6	0.129	0.109	0.054	0.036	0.134	0.104	0.052	0.035
236.8	0.131	0.112	0.054	0.038	0.134	0.104	0.052	0.035
237	0.127	0.107	0.052	0.034	0.134	0.104	0.052	0.035
237.2	0.123	0.103	0.052	0.033	0.134	0.104	0.052	0.035
237.4	0.125	0.108	0.055	0.037	0.134	0.104	0.052	0.035
237.6	0.13	0.11	0.053	0.037	0.134	0.104	0.052	0.035
237.8	0.13	0.106	0.05	0.035	0.134	0.104	0.052	0.035
238	0.127	0.099	0.047	0.032	0.134	0.104	0.052	0.035
238.2	0.124	0.097	0.047	0.029	0.134	0.104	0.052	0.035
238.4	0.13	0.103	0.05	0.032	0.135	0.104	0.052	0.035
238.6	0.135	0.106	0.051	0.036	0.135	0.105	0.052	0.035
238.8	0.131	0.099	0.046	0.031	0.135	0.105	0.052	0.035
239	0.126	0.092	0.044	0.025	0.135	0.105	0.052	0.035
239.2	0.124	0.092	0.046	0.026	0.135	0.105	0.052	0.035
239.4	0.126	0.097	0.048	0.028	0.135	0.105	0.052	0.035
239.6	0.128	0.098	0.046	0.027	0.135	0.105	0.052	0.035
239.8	0.126	0.094	0.045	0.026	0.135	0.105	0.052	0.035
240	0.123	0.094	0.044	0.026	0.135	0.105	0.052	0.035
240.2	0.123	0.098	0.047	0.027	0.135	0.105	0.052	0.035
240.4	0.127	0.105	0.049	0.033	0.135	0.105	0.052	0.035
240.6	0.133	0.111	0.051	0.039	0.135	0.105	0.052	0.035
240.8	0.129	0.106	0.048	0.035	0.135	0.105	0.052	0.035
241	0.123	0.099	0.047	0.031	0.135	0.105	0.052	0.035
241.2	0.123	0.102	0.05	0.035	0.136	0.105	0.052	0.035
241.4	0.129	0.107	0.052	0.037	0.136	0.105	0.053	0.035
241.6	0.132	0.107	0.049	0.037	0.136	0.105	0.053	0.035
241.8	0.129	0.102	0.048	0.035	0.136	0.105	0.053	0.035
242	0.126	0.1	0.048	0.032	0.136	0.106	0.053	0.035
242.2	0.13	0.104	0.051	0.034	0.136	0.106	0.053	0.036
242.4	0.135	0.11	0.054	0.039	0.136	0.106	0.053	0.036
242.6	0.134	0.107	0.052	0.035	0.136	0.106	0.053	0.036
242.8	0.128	0.099	0.048	0.03	0.136	0.106	0.053	0.036
243	0.124	0.096	0.049	0.028	0.136	0.106	0.053	0.036
243.2	0.125	0.103	0.052	0.03	0.136	0.106	0.053	0.036
243.4	0.129	0.106	0.052	0.032	0.136	0.106	0.053	0.036
243.6	0.13	0.105	0.05	0.032	0.136	0.106	0.053	0.036
243.8	0.127	0.103	0.048	0.031	0.136	0.106	0.053	0.036
244	0.125	0.104	0.049	0.031	0.137	0.106	0.053	0.036
244.2	0.128	0.108	0.052	0.035	0.137	0.106	0.053	0.036
244.4	0.132	0.113	0.053	0.039	0.137	0.106	0.053	0.036
244.6	0.13	0.109	0.051	0.036	0.137	0.106	0.053	0.036
244.8	0.123	0.099	0.048	0.031	0.137	0.106	0.053	0.036
245	0.121	0.097	0.05	0.031	0.137	0.106	0.053	0.036
245.2	0.126	0.103	0.052	0.034	0.137	0.106	0.053	0.036
245.4	0.131	0.105	0.053	0.036	0.137	0.106	0.053	0.036
245.6	0.129	0.101	0.05	0.035	0.137	0.107	0.053	0.036
245.8	0.125	0.095	0.05	0.03	0.137	0.107	0.053	0.036
246	0.128	0.099	0.053	0.031	0.137	0.107	0.053	0.036
246.2	0.132	0.103	0.056	0.036	0.137	0.107	0.053	0.036
246.4	0.132	0.104	0.054	0.034	0.137	0.107	0.053	0.036
246.6	0.13	0.097	0.051	0.029	0.137	0.107	0.053	0.036
246.8	0.125	0.093	0.05	0.027	0.138	0.107	0.053	0.036
247	0.125	0.098	0.052	0.027	0.138	0.107	0.053	0.036
247.2	0.13	0.104	0.053	0.03	0.138	0.107	0.053	0.036
247.4	0.133	0.105	0.052	0.033	0.138	0.107	0.053	0.036
247.6	0.132	0.105	0.049	0.033	0.138	0.107	0.053	0.036
247.8	0.127	0.102	0.049	0.029	0.138	0.107	0.053	0.036
248	0.127	0.106	0.052	0.032	0.138	0.107	0.053	0.036
248.2	0.132	0.112	0.055	0.038	0.138	0.107	0.053	0.036
248.4	0.132	0.109	0.051	0.035	0.138	0.107	0.054	0.036
248.6	0.126	0.1	0.047	0.03	0.138	0.107	0.054	0.036
248.8	0.122	0.097	0.049	0.031	0.138	0.107	0.054	0.036
249	0.126	0.102	0.051	0.033	0.138	0.107	0.054	0.036
249.2	0.133	0.106	0.051	0.036	0.138	0.107	0.054	0.036
249.4	0.134	0.103	0.05	0.036	0.138	0.108	0.054	0.036
249.6	0.129	0.097	0.047	0.031	0.139	0.108	0.054	0.036
249.8	0.128	0.096	0.05	0.03	0.139	0.108	0.054	0.036
250	0.132	0.102	0.053	0.035	0.139	0.108	0.054	0.036
250.2	0.134	0.103	0.052	0.034	0.139	0.108	0.054	0.036
250.4	0.132	0.097	0.048	0.03	0.139	0.108	0.054	0.036
250.6	0.127	0.092	0.047	0.027	0.139	0.108	0.054	0.036
250.8	0.126	0.095	0.048	0.028	0.139	0.108	0.054	0.036
251	0.131	0.102	0.05	0.031	0.139	0.108	0.054	0.036
251.2	0.134	0.105	0.05	0.034	0.139	0.108	0.054	0.036
251.4	0.133	0.106	0.048	0.035	0.139	0.108	0.054	0.036
251.6	0.128	0.104	0.047	0.032	0.139	0.108	0.054	0.036
251.8	0.127	0.106	0.052	0.034	0.139	0.108	0.054	0.036
252	0.132	0.112	0.055	0.039	0.139	0.108	0.054	0.036
252.2	0.133	0.113	0.054	0.038	0.139	0.108	0.054	0.037
252.4	0.129	0.105	0.049	0.034	0.139	0.108	0.054	0.037
252.6	0.124	0.099	0.05	0.033	0.14	0.108	0.054	0.037
252.8	0.127	0.104	0.053	0.034	0.14	0.108	0.054	0.037
253	0.134	0.109	0.055	0.037	0.14	0.109	0.054	0.037
253.2	0.135	0.107	0.053	0.037	0.14	0.109	0.054	0.037
253.4	0.13	0.101	0.05	0.031	0.14	0.109	0.054	0.037
253.6	0.127	0.097	0.051	0.029	0.14	0.109	0.054	0.037
253.8	0.129	0.1	0.054	0.032	0.14	0.109	0.054	0.037
254	0.131	0.103	0.053	0.032	0.14	0.109	0.054	0.037
254.2	0.13	0.098	0.049	0.028	0.14	0.109	0.054	0.037
254.4	0.125	0.093	0.047	0.026	0.14	0.109	0.054	0.037
254.6	0.123	0.094	0.048	0.026	0.14	0.109	0.054	0.037
254.8	0.126	0.101	0.049	0.028	0.14	0.109	0.054	0.037
255	0.132	0.107	0.051	0.033	0.14	0.109	0.054	0.037
255.2	0.133	0.108	0.05	0.035	0.14	0.109	0.054	0.037
255.4	0.129	0.104	0.048	0.031	0.141	0.109	0.054	0.037
255.6	0.126	0.103	0.05	0.032	0.141	0.109	0.055	0.037
255.8	0.13	0.109	0.054	0.038	0.141	0.109	0.055	0.037
256	0.134	0.112	0.053	0.038	0.141	0.109	0.055	0.037
256.2	0.133	0.107	0.05	0.035	0.141	0.109	0.055	0.037
256.4	0.13	0.102	0.048	0.034	0.141	0.109	0.055	0.037
256.6	0.13	0.104	0.051	0.034	0.141	0.109	0.055	0.037
256.8	0.138	0.112	0.054	0.038	0.141	0.11	0.055	0.037
257	0.143	0.115	0.055	0.042	0.141	0.11	0.055	0.037
257.2	0.14	0.11	0.051	0.037	0.141	0.11	0.055	0.037
257.4	0.135	0.104	0.051	0.032	0.141	0.11	0.055	0.037
257.6	0.135	0.105	0.053	0.035	0.141	0.11	0.055	0.037
257.8	0.137	0.11	0.054	0.036	0.141	0.11	0.055	0.037
258	0.137	0.108	0.051	0.033	0.141	0.11	0.055	0.037
258.2	0.134	0.104	0.05	0.032	0.141	0.11	0.055	0.037
258.4	0.131	0.104	0.05	0.032	0.142	0.11	0.055	0.037
258.6	0.131	0.107	0.051	0.032	0.142	0.11	0.055	0.037
258.8	0.134	0.113	0.054	0.037	0.142	0.11	0.055	0.037
259	0.138	0.117	0.056	0.041	0.142	0.11	0.055	0.037
259.2	0.133	0.11	0.052	0.036	0.142	0.11	0.055	0.037
259.4	0.127	0.103	0.05	0.033	0.142	0.11	0.055	0.037
259.6	0.127	0.107	0.052	0.036	0.142	0.11	0.055	0.037
259.8	0.132	0.11	0.053	0.038	0.142	0.11	0.055	0.037
260	0.134	0.108	0.049	0.037	0.142	0.11	0.055	0.037
260.2	0.131	0.101	0.047	0.034	0.142	0.11	0.055	0.037
260.4	0.13	0.1	0.048	0.033	0.142	0.11	0.055	0.037
260.6	0.136	0.105	0.051	0.036	0.142	0.111	0.055	0.037
260.8	0.141	0.109	0.052	0.04	0.142	0.111	0.055	0.037
261	0.14	0.107	0.05	0.037	0.142	0.111	0.055	0.037
261.2	0.135	0.098	0.045	0.03	0.142	0.111	0.055	0.037
261.4	0.131	0.094	0.046	0.029	0.143	0.111	0.055	0.037
261.6	0.133	0.1	0.048	0.031	0.143	0.111	0.055	0.037
261.8	0.137	0.103	0.048	0.032	0.143	0.111	0.055	0.037
262	0.136	0.1	0.046	0.031	0.143	0.111	0.055	0.037
262.2	0.133	0.1	0.047	0.03	0.143	0.111	0.055	0.037
262.4	0.132	0.103	0.048	0.03	0.143	0.111	0.055	0.038
262.6	0.135	0.109	0.052	0.035	0.143	0.111	0.055	0.038
262.8	0.14	0.116	0.055	0.04	0.143	0.111	0.055	0.038
263	0.138	0.113	0.052	0.037	0.143	0.111	0.056	0.038
263.2	0.131	0.107	0.048	0.033	0.143	0.111	0.056	0.038
263.4	0.129	0.108	0.05	0.035	0.143	0.111	0.056	0.038
263.6	0.134	0.115	0.052	0.038	0.143	0.111	0.056	0.038
263.8	0.139	0.114	0.051	0.038	0.143	0.111	0.056	0.038
264	0.138	0.11	0.048	0.037	0.143	0.111	0.056	0.038
264.2	0.134	0.105	0.048	0.033	0.143	0.111	0.056	0.038
264.4	0.138	0.11	0.052	0.036	0.144	0.112	0.056	0.038
264.6	0.143	0.115	0.055	0.041	0.144	0.112	0.056	0.038
264.8	0.143	0.115	0.053	0.039	0.144	0.112	0.056	0.038
265	0.14	0.107	0.05	0.034	0.144	0.112	0.056	0.038
265.2	0.135	0.102	0.049	0.032	0.144	0.112	0.056	0.038
265.4	0.135	0.106	0.05	0.032	0.144	0.112	0.056	0.038
265.6	0.139	0.111	0.051	0.034	0.144	0.112	0.056	0.038
265.8	0.141	0.11	0.051	0.036	0.144	0.112	0.056	0.038
266	0.138	0.109	0.05	0.034	0.144	0.112	0.056	0.038
266.2	0.135	0.108	0.051	0.032	0.144	0.112	0.056	0.038
266.4	0.137	0.113	0.054	0.036	0.144	0.112	0.056	0.038
266.6	0.141	0.118	0.057	0.041	0.144	0.112	0.056	0.038
266.8	0.139	0.114	0.052	0.037	0.144	0.112	0.056	0.038
267	0.132	0.105	0.048	0.032	0.144	0.112	0.056	0.038
267.2	0.129	0.103	0.048	0.033	0.144	0.112	0.056	0.038
267.4	0.133	0.108	0.049	0.034	0.145	0.112	0.056	0.038
267.6	0.138	0.109	0.049	0.036	0.145	0.112	0.056	0.038
267.8	0.138	0.105	0.047	0.035	0.145	0.112	0.056	0.038
268	0.133	0.1	0.045	0.03	0.145	0.112	0.056	0.038
268.2	0.133	0.1	0.047	0.03	0.145	0.113	0.056	0.038
268.4	0.137	0.105	0.051	0.035	0.145	0.113	0.056	0.038
268.6	0.137	0.106	0.049	0.033	0.145	0.113	0.056	0.038
268.8	0.135	0.099	0.045	0.028	0.145	0.113	0.056	0.038
269	0.129	0.093	0.044	0.025	0.145	0.113	0.056	0.038
269.2	0.128	0.097	0.046	0.026	0.145	0.113	0.056	0.038
269.4	0.133	0.103	0.048	0.029	0.145	0.113	0.056	0.038
269.6	0.136	0.106	0.05	0.032	0.145	0.113	0.056	0.038
269.8	0.136	0.107	0.051	0.033	0.145	0.113	0.056	0.038
270	0.131	0.104	0.05	0.029	0.145	0.113	0.056	0.038
270.2	0.129	0.105	0.052	0.031	0.145	0.113	0.056	0.038
270.4	0.134	0.114	0.057	0.038	0.146	0.113	0.056	0.038
270.6	0.137	0.114	0.055	0.037	0.146	0.113	0.057	0.038
270.8	0.133	0.106	0.05	0.034	0.146	0.113	0.057	0.038
271	0.13	0.102	0.05	0.033	0.146	0.113	0.057	0.038
271.2	0.134	0.108	0.053	0.036	0.146	0.113	0.057	0.038
271.4	0.142	0.113	0.054	0.039	0.146	0.113	0.057	0.038
271.6	0.145	0.114	0.055	0.041	0.146	0.113	0.057	0.038
271.8	0.141	0.108	0.051	0.036	0.146	0.113	0.057	0.038
272	0.139	0.105	0.052	0.034	0.146	0.113	0.057	0.038
272.2	0.141	0.108	0.055	0.037	0.146	0.114	0.057	0.038
272.4	0.143	0.112	0.054	0.037	0.146	0.114	0.057	0.038
272.6	0.143	0.107	0.051	0.034	0.146	0.114	0.057	0.038
272.8	0.138	0.101	0.048	0.031	0.146	0.114	0.057	0.038
273	0.136	0.102	0.049	0.03	0.146	0.114	0.057	0.039
273.2	0.139	0.108	0.052	0.032	0.146	0.114	0.057	0.039
273.4	0.143	0.112	0.053	0.036	0.147	0.114	0.057	0.039
273.6	0.144	0.114	0.054	0.038	0.147	0.114	0.057	0.039
273.8	0.139	0.11	0.052	0.034	0.147	0.114	0.057	0.039
274	0.134	0.106	0.051	0.033	0.147	0.114	0.057	0.039
274.2	0.136	0.111	0.055	0.037	0.147	0.114	0.057	0.039
274.4	0.14	0.114	0.054	0.038	0.147	0.114	0.057	0.039
274.6	0.14	0.108	0.05	0.036	0.147	0.114	0.057	0.039
274.8	0.135	0.103	0.047	0.034	0.147	0.114	0.057	0.039
275	0.133	0.101	0.048	0.032	0.147	0.114	0.057	0.039
275.2	0.14	0.107	0.052	0.036	0.147	0.114	0.057	0.039
275.4	0.143	0.107	0.053	0.038	0.147	0.114	0.057	0.039
275.6	0.14	0.102	0.05	0.034	0.147	0.114	0.057	0.039
275.8	0.134	0.094	0.048	0.029	0.147	0.114	0.057	0.039
276	0.133	0.094	0.051	0.03	0.147	0.114	0.057	0.039
276.2	0.134	0.098	0.051	0.031	0.147	0.115	0.057	0.039
276.4	0.135	0.098	0.05	0.029	0.147	0.115	0.057	0.039
276.6	0.133	0.094	0.048	0.029	0.148	0.115	0.057	0.039
276.8	0.128	0.093	0.047	0.026	0.148	0.115	0.057	0.039
277	0.128	0.097	0.05	0.027	0.148	0.115	0.057	0.039
277.2	0.133	0.106	0.055	0.034	0.148	0.115	0.057	0.039
277.4	0.137	0.111	0.057	0.038	0.148	0.115	0.057	0.039
277.6	0.135	0.109	0.055	0.036	0.148	0.115	0.057	0.039
277.8	0.129	0.104	0.052	0.033	0.148	0.115	0.057	0.039
278	0.13	0.108	0.055	0.036	0.148	0.115	0.057	0.039
278.2	0.135	0.114	0.055	0.038	0.148	0.115	0.057	0.039
278.4	0.14	0.114	0.053	0.039	0.148	0.115	0.058	0.039
278.6	0.14	0.112	0.051	0.039	0.148	0.115	0.058	0.039
278.8	0.136	0.109	0.05	0.035	0.148	0.115	0.058	0.039
279	0.14	0.109	0.053	0.037	0.148	0.115	0.058	0.039
279.2	0.146	0.114	0.056	0.042	0.148	0.115	0.058	0.039
279.4	0.145	0.11	0.052	0.038	0.148	0.115	0.058	0.039
279.6	0.141	0.102	0.049	0.033	0.148	0.115	0.058	0.039
279.8	0.137	0.098	0.049	0.032	0.149	0.115	0.058	0.039
280	0.139	0.104	0.052	0.034	0.149	0.115	0.058	0.039
280.2	0.142	0.106	0.052	0.034	0.149	0.116	0.058	0.039
280.4	0.144	0.106	0.052	0.036	0.149	0.116	0.058	0.039
280.6	0.139	0.104	0.049	0.033	0.149	0.116	0.058	0.039
280.8	0.136	0.104	0.05	0.03	0.149	0.116	0.058	0.039
281	0.138	0.109	0.055	0.036	0.149	0.116	0.058	0.039
281.2	0.143	0.118	0.06	0.041	0.149	0.116	0.058	0.039
281.4	0.142	0.115	0.056	0.038	0.149	0.116	0.058	0.039
281.6	0.136	0.107	0.053	0.034	0.149	0.116	0.058	0.039
281.8	0.133	0.107	0.053	0.034	0.149	0.116	0.058	0.039
282	0.137	0.112	0.056	0.036	0.149	0.116	0.058	0.039
282.2	0.143	0.115	0.056	0.038	0.149	0.116	0.058	0.039
282.4	0.146	0.116	0.056	0.04	0.149	0.116	0.058	0.039
282.6	0.141	0.109	0.053	0.035	0.149	0.116	0.058	0.039
282.8	0.14	0.105	0.053	0.033	0.149	0.116	0.058	0.039
283	0.144	0.109	0.056	0.037	0.15	0.116	0.058	0.039
283.2	0.145	0.11	0.055	0.036	0.15	0.116	0.058	0.039
283.4	0.143	0.103	0.051	0.031	0.15	0.116	0.058	0.039
283.6	0.137	0.096	0.05	0.029	0.15	0.116	0.058	0.039
283.8	0.135	0.099	0.051	0.029	0.15	0.116	0.058	0.039
284	0.139	0.105	0.053	0.031	0.15	0.116	0.058	0.04
284.2	0.143	0.107	0.053	0.035	0.15	0.117	0.058	0.04
284.4	0.143	0.108	0.054	0.036	0.15	0.117	0.058	0.04
284.6	0.137	0.105	0.051	0.031	0.15	0.117	0.058	0.04
284.8	0.135	0.107	0.054	0.033	0.15	0.117	0.058	0.04
285	0.137	0.113	0.057	0.037	0.15	0.117	0.058	0.04
285.2	0.14	0.115	0.056	0.037	0.15	0.117	0.058	0.04
285.4	0.138	0.109	0.051	0.034	0.15	0.117	0.058	0.04
285.6	0.134	0.107	0.051	0.034	0.15	0.117	0.058	0.04
285.8	0.136	0.111	0.054	0.035	0.15	0.117	0.058	0.04
286	0.144	0.116	0.056	0.04	0.15	0.117	0.058	0.04
286.2	0.148	0.119	0.056	0.043	0.151	0.117	0.058	0.04
286.4	0.145	0.113	0.054	0.039	0.151	0.117	0.059	0.04
286.6	0.141	0.104	0.052	0.034	0.151	0.117	0.059	0.04
286.8	0.14	0.104	0.054	0.035	0.151	0.117	0.059	0.04
287	0.143	0.11	0.056	0.037	0.151	0.117	0.059	0.04
287.2	0.145	0.106	0.053	0.034	0.151	0.117	0.059	0.04
287.4	0.141	0.101	0.052	0.033	0.151	0.117	0.059	0.04
287.6	0.138	0.102	0.053	0.032	0.151	0.117	0.059	0.04
287.8	0.141	0.108	0.056	0.034	0.151	0.117	0.059	0.04
288	0.147	0.114	0.058	0.04	0.151	0.117	0.059	0.04
288.2	0.149	0.117	0.059	0.043	0.151	0.117	0.059	0.04
288.4	0.144	0.113	0.057	0.038	0.151	0.118	0.059	0.04
288.6	0.139	0.11	0.056	0.037	0.151	0.118	0.059	0.04
288.8	0.139	0.114	0.058	0.039	0.151	0.118	0.059	0.04
289	0.143	0.119	0.057	0.04	0.151	0.118	0.059	0.04
289.2	0.146	0.116	0.056	0.041	0.151	0.118	0.059	0.04
289.4	0.142	0.113	0.053	0.039	0.152	0.118	0.059	0.04
289.6	0.14	0.112	0.054	0.037	0.152	0.118	0.059	0.04
289.8	0.147	0.117	0.058	0.042	0.152	0.118	0.059	0.04
290	0.152	0.119	0.058	0.045	0.152	0.118	0.059	0.04
290.2	0.149	0.113	0.055	0.04	0.152	0.118	0.059	0.04
290.4	0.143	0.102	0.053	0.034	0.152	0.118	0.059	0.04
290.6	0.14	0.1	0.054	0.033	0.152	0.118	0.059	0.04
290.8	0.142	0.105	0.056	0.034	0.152	0.118	0.059	0.04
291	0.145	0.106	0.056	0.034	0.152	0.118	0.059	0.04
291.2	0.145	0.103	0.054	0.034	0.152	0.118	0.059	0.04
291.4	0.14	0.101	0.053	0.031	0.152	0.118	0.059	0.04
291.6	0.139	0.103	0.055	0.03	0.152	0.118	0.059	0.04
291.8	0.143	0.11	0.059	0.036	0.152	0.118	0.059	0.04
292	0.147	0.115	0.061	0.04	0.152	0.118	0.059	0.04
292.2	0.143	0.111	0.057	0.036	0.152	0.118	0.059	0.04
292.4	0.137	0.105	0.055	0.032	0.152	0.118	0.059	0.04
292.6	0.136	0.109	0.057	0.036	0.152	0.119	0.059	0.04
292.8	0.14	0.115	0.057	0.037	0.153	0.119	0.059	0.04
293	0.146	0.116	0.057	0.04	0.153	0.119	0.059	0.04
293.2	0.146	0.114	0.055	0.041	0.153	0.119	0.059	0.04
293.4	0.143	0.111	0.053	0.037	0.153	0.119	0.059	0.04
293.6	0.146	0.111	0.056	0.038	0.153	0.119	0.059	0.04
293.8	0.151	0.118	0.058	0.044	0.153	0.119	0.059	0.04
294	0.151	0.115	0.056	0.041	0.153	0.119	0.059	0.04
294.2	0.146	0.106	0.052	0.035	0.153	0.119	0.059	0.04
294.4	0.142	0.101	0.052	0.033	0.153	0.119	0.059	0.04
294.6	0.142	0.106	0.054	0.035	0.153	0.119	0.06	0.04
294.8	0.146	0.11	0.054	0.035	0.153	0.119	0.06	0.04
295	0.147	0.11	0.054	0.037	0.153	0.119	0.06	0.04
295.2	0.144	0.108	0.052	0.035	0.153	0.119	0.06	0.04
295.4	0.14	0.107	0.052	0.032	0.153	0.119	0.06	0.041
295.6	0.141	0.111	0.055	0.036	0.153	0.119	0.06	0.041
295.8	0.145	0.12	0.06	0.042	0.153	0.119	0.06	0.041
296	0.147	0.12	0.058	0.04	0.154	0.119	0.06	0.041
296.2	0.142	0.112	0.054	0.037	0.154	0.119	0.06	0.041
296.4	0.139	0.111	0.055	0.036	0.154	0.119	0.06	0.041
296.6	0.144	0.117	0.057	0.04	0.154	0.119	0.06	0.041
296.8	0.151	0.12	0.058	0.043	0.154	0.119	0.06	0.041
297	0.154	0.121	0.057	0.045	0.154	0.12	0.06	0.041
297.2	0.15	0.114	0.055	0.04	0.154	0.12	0.06	0.041
297.4	0.149	0.109	0.056	0.037	0.154	0.12	0.06	0.041
297.6	0.15	0.111	0.058	0.039	0.154	0.12	0.06	0.041
297.8	0.151	0.114	0.057	0.039	0.154	0.12	0.06	0.041
298	0.151	0.107	0.054	0.035	0.154	0.12	0.06	0.041
298.2	0.145	0.1	0.051	0.032	0.154	0.12	0.06	0.041
298.4	0.142	0.102	0.052	0.031	0.154	0.12	0.06	0.041
298.6	0.145	0.109	0.055	0.034	0.154	0.12	0.06	0.041
298.8	0.148	0.113	0.056	0.038	0.154	0.12	0.06	0.041
299	0.147	0.113	0.054	0.037	0.154	0.12	0.06	0.041
299.2	0.142	0.109	0.053	0.033	0.154	0.12	0.06	0.041
299.4	0.141	0.112	0.056	0.037	0.155	0.12	0.06	0.041
299.6	0.145	0.118	0.06	0.042	0.155	0.12	0.06	0.041
299.8	0.148	0.121	0.059	0.042	0.155	0.12	0.06	0.041
300	0.148	0.115	0.055	0.039	0.155	0.12	0.06	0.041
300.2	0.143	0.111	0.053	0.038	0.155	0.12	0.06	0.041
300.4	0.143	0.113	0.054	0.037	0.155	0.12	0.06	0.041
300.6	0.152	0.119	0.058	0.042	0.155	0.12	0.06	0.041
300.8	0.156	0.121	0.058	0.045	0.155	0.12	0.06	0.041
301	0.153	0.115	0.055	0.04	0.155	0.12	0.06	0.041
301.2	0.147	0.106	0.054	0.035	0.155	0.121	0.06	0.041
301.4	0.148	0.108	0.057	0.037	0.155	0.121	0.06	0.041
301.6	0.15	0.111	0.056	0.038	0.155	0.121	0.06	0.041
301.8	0.152	0.11	0.054	0.036	0.155	0.121	0.06	0.041
302	0.149	0.104	0.051	0.034	0.155	0.121	0.06	0.041
302.2	0.145	0.104	0.052	0.032	0.155	0.121	0.06	0.041
302.4	0.147	0.109	0.055	0.034	0.155	0.121	0.06	0.041
302.6	0.152	0.117	0.058	0.04	0.155	0.121	0.06	0.041
302.8	0.153	0.118	0.057	0.042	0.156	0.121	0.06	0.041
303	0.149	0.115	0.055	0.037	0.156	0.121	0.061	0.041
303.2	0.145	0.112	0.056	0.038	0.156	0.121	0.061	0.041
303.4	0.148	0.12	0.06	0.043	0.156	0.121	0.061	0.041
303.6	0.152	0.123	0.06	0.044	0.156	0.121	0.061	0.041
303.8	0.154	0.121	0.057	0.044	0.156	0.121	0.061	0.041
304	0.151	0.117	0.055	0.043	0.156	0.121	0.061	0.041
304.2	0.148	0.115	0.056	0.041	0.156	0.121	0.061	0.041
304.4	0.152	0.117	0.059	0.043	0.156	0.121	0.061	0.041
304.6	0.157	0.122	0.061	0.048	0.156	0.121	0.061	0.041
304.8	0.156	0.118	0.059	0.045	0.156	0.121	0.061	0.041
305	0.149	0.108	0.056	0.039	0.156	0.121	0.061	0.041
305.2	0.147	0.105	0.057	0.039	0.156	0.121	0.061	0.041
305.4	0.152	0.111	0.059	0.041	0.156	0.121	0.061	0.041
305.6	0.155	0.112	0.058	0.04	0.156	0.122	0.061	0.041
305.8	0.154	0.108	0.056	0.039	0.156	0.122	0.061	0.041
306	0.151	0.107	0.055	0.036	0.156	0.122	0.061	0.041
306.2	0.151	0.11	0.057	0.035	0.157	0.122	0.061	0.041
306.4	0.154	0.116	0.06	0.04	0.157	0.122	0.061	0.041
306.6	0.156	0.121	0.06	0.043	0.157	0.122	0.061	0.041
306.8	0.155	0.118	0.058	0.039	0.157	0.122	0.061	0.041
307	0.15	0.114	0.057	0.038	0.157	0.122	0.061	0.042
307.2	0.149	0.116	0.059	0.04	0.157	0.122	0.061	0.042
307.4	0.156	0.125	0.062	0.044	0.157	0.122	0.061	0.042
307.6	0.161	0.126	0.061	0.047	0.157	0.122	0.061	0.042
307.8	0.16	0.123	0.059	0.048	0.157	0.122	0.061	0.042
308	0.156	0.119	0.058	0.044	0.157	0.122	0.061	0.042
308.2	0.156	0.12	0.061	0.046	0.157	0.122	0.061	0.042
308.4	0.161	0.125	0.064	0.051	0.157	0.122	0.061	0.042
308.6	0.163	0.125	0.062	0.049	0.157	0.122	0.061	0.042
308.8	0.159	0.116	0.059	0.044	0.157	0.122	0.061	0.042
309	0.153	0.11	0.058	0.041	0.157	0.122	0.061	0.042
309.2	0.155	0.113	0.059	0.041	0.157	0.122	0.061	0.042
309.4	0.159	0.117	0.06	0.042	0.157	0.122	0.061	0.042
309.6	0.161	0.117	0.059	0.042	0.157	0.122	0.061	0.042
309.8	0.157	0.114	0.056	0.039	0.158	0.122	0.061	0.042
310	0.152	0.112	0.055	0.035	0.158	0.122	0.061	0.042
310.2	0.152	0.116	0.058	0.038	0.158	0.123	0.061	0.042
310.4	0.154	0.121	0.059	0.041	0.158	0.123	0.061	0.042
310.6	0.154	0.12	0.057	0.039	0.158	0.123	0.061	0.042
310.8	0.152	0.114	0.055	0.037	0.158	0.123	0.061	0.042
311	0.147	0.114	0.055	0.037	0.158	0.123	0.061	0.042
311.2	0.151	0.119	0.057	0.039	0.158	0.123	0.061	0.042
311.4	0.158	0.124	0.059	0.044	0.158	0.123	0.061	0.042
311.6	0.159	0.123	0.059	0.045	0.158	0.123	0.062	0.042
311.8	0.155	0.119	0.057	0.041	0.158	0.123	0.062	0.042
312	0.151	0.114	0.059	0.039	0.158	0.123	0.062	0.042
312.2	0.154	0.119	0.063	0.044	0.158	0.123	0.062	0.042
312.4	0.159	0.122	0.063	0.045	0.158	0.123	0.062	0.042
312.6	0.158	0.116	0.059	0.041	0.158	0.123	0.062	0.042
312.8	0.153	0.11	0.059	0.038	0.158	0.123	0.062	0.042
313	0.153	0.114	0.06	0.039	0.158	0.123	0.062	0.042
313.2	0.157	0.119	0.062	0.041	0.158	0.123	0.062	0.042
313.4	0.161	0.123	0.063	0.045	0.159	0.123	0.062	0.042
313.6	0.159	0.122	0.061	0.044	0.159	0.123	0.062	0.042
313.8	0.155	0.118	0.059	0.04	0.159	0.123	0.062	0.042
314	0.153	0.12	0.062	0.042	0.159	0.123	0.062	0.042
314.2	0.155	0.125	0.063	0.046	0.159	0.123	0.062	0.042
314.4	0.158	0.127	0.061	0.046	0.159	0.123	0.062	0.042
314.6	0.159	0.123	0.06	0.045	0.159	0.124	0.062	0.042
314.8	0.154	0.12	0.058	0.043	0.159	0.124	0.062	0.042
315	0.153	0.122	0.06	0.043	0.159	0.124	0.062	0.042
315.2	0.159	0.126	0.063	0.048	0.159	0.124	0.062	0.042
315.4	0.162	0.127	0.063	0.05	0.159	0.124	0.062	0.042
315.6	0.158	0.12	0.06	0.045	0.159	0.124	0.062	0.042
315.8	0.152	0.112	0.059	0.041	0.159	0.124	0.062	0.042
316	0.15	0.11	0.061	0.041	0.159	0.124	0.062	0.042
316.2	0.154	0.115	0.062	0.041	0.159	0.124	0.062	0.042
316.4	0.156	0.114	0.06	0.04	0.159	0.124	0.062	0.042
316.6	0.153	0.108	0.057	0.037	0.159	0.124	0.062	0.042
316.8	0.15	0.108	0.057	0.035	0.159	0.124	0.062	0.042
317	0.152	0.113	0.06	0.037	0.16	0.124	0.062	0.042
317.2	0.157	0.119	0.062	0.042	0.16	0.124	0.062	0.042
317.4	0.157	0.119	0.06	0.041	0.16	0.124	0.062	0.042
317.6	0.153	0.115	0.058	0.037	0.16	0.124	0.062	0.042
317.8	0.151	0.114	0.059	0.038	0.16	0.124	0.062	0.042
318	0.152	0.12	0.061	0.041	0.16	0.124	0.062	0.042
318.2	0.156	0.124	0.06	0.042	0.16	0.124	0.062	0.042
318.4	0.16	0.123	0.06	0.044	0.16	0.124	0.062	0.042
318.6	0.158	0.12	0.058	0.043	0.16	0.124	0.062	0.042
318.8	0.156	0.12	0.059	0.041	0.16	0.124	0.062	0.042
319	0.16	0.125	0.063	0.046	0.16	0.124	0.062	0.043
319.2	0.166	0.129	0.065	0.051	0.16	0.124	0.062	0.043
319.4	0.164	0.123	0.061	0.047	0.16	0.125	0.062	0.043
319.6	0.157	0.114	0.059	0.041	0.16	0.125	0.062	0.043
319.8	0.155	0.114	0.061	0.042	0.16	0.125	0.062	0.043
320	0.159	0.119	0.062	0.042	0.16	0.125	0.062	0.043
320.2	0.162	0.12	0.06	0.042	0.16	0.125	0.062	0.043
320.4	0.162	0.117	0.059	0.041	0.16	0.125	0.062	0.043
320.6	0.159	0.115	0.057	0.038	0.161	0.125	0.063	0.043
320.8	0.158	0.118	0.058	0.037	0.161	0.125	0.063	0.043
321	0.163	0.125	0.061	0.043	0.161	0.125	0.063	0.043
321.2	0.164	0.126	0.06	0.044	0.161	0.125	0.063	0.043
321.4	0.159	0.121	0.057	0.039	0.161	0.125	0.063	0.043
321.6	0.154	0.117	0.057	0.037	0.161	0.125	0.063	0.043
321.8	0.153	0.122	0.059	0.041	0.161	0.125	0.063	0.043
322	0.158	0.126	0.06	0.043	0.161	0.125	0.063	0.043
322.2	0.162	0.127	0.059	0.045	0.161	0.125	0.063	0.043
322.4	0.161	0.123	0.059	0.044	0.161	0.125	0.063	0.043
322.6	0.157	0.121	0.059	0.042	0.161	0.125	0.063	0.043
322.8	0.158	0.122	0.062	0.044	0.161	0.125	0.063	0.043
323	0.162	0.127	0.065	0.049	0.161	0.125	0.063	0.043
323.2	0.162	0.124	0.063	0.046	0.161	0.125	0.063	0.043
323.4	0.155	0.113	0.059	0.04	0.161	0.125	0.063	0.043
323.6	0.151	0.108	0.06	0.038	0.161	0.125	0.063	0.043
323.8	0.154	0.114	0.062	0.04	0.161	0.125	0.063	0.043
324	0.158	0.115	0.062	0.04	0.161	0.126	0.063	0.043
324.2	0.159	0.114	0.061	0.041	0.162	0.126	0.063	0.043
324.4	0.157	0.114	0.06	0.039	0.162	0.126	0.063	0.043
324.6	0.155	0.115	0.06	0.037	0.162	0.126	0.063	0.043
324.8	0.156	0.119	0.063	0.042	0.162	0.126	0.063	0.043
325	0.16	0.126	0.065	0.045	0.162	0.126	0.063	0.043
325.2	0.159	0.123	0.063	0.043	0.162	0.126	0.063	0.043
325.4	0.157	0.119	0.062	0.042	0.162	0.126	0.063	0.043
325.6	0.155	0.122	0.064	0.044	0.162	0.126	0.063	0.043
325.8	0.16	0.13	0.067	0.047	0.162	0.126	0.063	0.043
326	0.167	0.132	0.067	0.051	0.162	0.126	0.063	0.043
326.2	0.167	0.132	0.066	0.051	0.162	0.126	0.063	0.043
326.4	0.164	0.129	0.065	0.048	0.162	0.126	0.063	0.043
326.6	0.163	0.127	0.067	0.048	0.162	0.126	0.063	0.043
326.8	0.167	0.133	0.07	0.052	0.162	0.126	0.063	0.043
327	0.169	0.133	0.069	0.051	0.162	0.126	0.063	0.043
327.2	0.166	0.124	0.065	0.046	0.162	0.126	0.063	0.043
327.4	0.161	0.118	0.064	0.043	0.162	0.126	0.063	0.043
327.6	0.161	0.121	0.065	0.043	0.162	0.126	0.063	0.043
327.8	0.166	0.127	0.067	0.045	0.162	0.126	0.063	0.043
328	0.168	0.128	0.066	0.047	0.163	0.126	0.063	0.043
328.2	0.165	0.126	0.064	0.044	0.163	0.126	0.063	0.043
328.4	0.16	0.124	0.062	0.041	0.163	0.126	0.063	0.043
328.6	0.159	0.126	0.064	0.043	0.163	0.126	0.063	0.043
328.8	0.161	0.132	0.066	0.047	0.163	0.127	0.063	0.043
329	0.164	0.133	0.065	0.047	0.163	0.127	0.063	0.043
329.2	0.161	0.127	0.063	0.046	0.163	0.127	0.063	0.043
329.4	0.157	0.126	0.063	0.045	0.163	0.127	0.063	0.043
329.6	0.16	0.131	0.065	0.047	0.163	0.127	0.063	0.043
329.8	0.168	0.137	0.068	0.053	0.163	0.127	0.064	0.043
330	0.17	0.137	0.066	0.055	0.163	0.127	0.064	0.043
330.2	0.166	0.131	0.064	0.05	0.163	0.127	0.064	0.043
330.4	0.163	0.126	0.065	0.048	0.163	0.127	0.064	0.043
330.6	0.165	0.129	0.068	0.052	0.163	0.127	0.064	0.043
330.8	0.17	0.132	0.068	0.053	0.163	0.127	0.064	0.043
331	0.168	0.125	0.066	0.048	0.163	0.127	0.064	0.043
331.2	0.163	0.118	0.063	0.045	0.163	0.127	0.064	0.043
331.4	0.162	0.118	0.063	0.042	0.163	0.127	0.064	0.043
331.6	0.165	0.124	0.064	0.043	0.163	0.127	0.064	0.044
331.8	0.169	0.127	0.065	0.046	0.164	0.127	0.064	0.044
332	0.167	0.125	0.062	0.044	0.164	0.127	0.064	0.044
332.2	0.161	0.121	0.06	0.038	0.164	0.127	0.064	0.044
332.4	0.159	0.122	0.062	0.04	0.164	0.127	0.064	0.044
332.6	0.16	0.127	0.064	0.043	0.164	0.127	0.064	0.044
332.8	0.163	0.128	0.063	0.044	0.164	0.127	0.064	0.044
333	0.163	0.124	0.061	0.043	0.164	0.127	0.064	0.044
333.2	0.158	0.121	0.059	0.043	0.164	0.127	0.064	0.044
333.4	0.158	0.123	0.061	0.042	0.164	0.127	0.064	0.044
333.6	0.165	0.129	0.065	0.048	0.164	0.128	0.064	0.044
333.8	0.169	0.131	0.065	0.051	0.164	0.128	0.064	0.044
334	0.166	0.124	0.062	0.046	0.164	0.128	0.064	0.044
334.2	0.16	0.116	0.062	0.042	0.164	0.128	0.064	0.044
334.4	0.159	0.117	0.065	0.045	0.164	0.128	0.064	0.044
334.6	0.163	0.122	0.066	0.046	0.164	0.128	0.064	0.044
334.8	0.165	0.119	0.064	0.044	0.164	0.128	0.064	0.044
335	0.162	0.114	0.062	0.043	0.164	0.128	0.064	0.044
335.2	0.16	0.114	0.062	0.04	0.164	0.128	0.064	0.044
335.4	0.162	0.119	0.063	0.041	0.164	0.128	0.064	0.044
335.6	0.167	0.127	0.066	0.047	0.165	0.128	0.064	0.044
335.8	0.168	0.128	0.065	0.047	0.165	0.128	0.064	0.044
336	0.164	0.124	0.062	0.043	0.165	0.128	0.064	0.044
336.2	0.161	0.123	0.063	0.042	0.165	0.128	0.064	0.044
336.4	0.163	0.129	0.066	0.046	0.165	0.128	0.064	0.044
336.6	0.167	0.133	0.065	0.048	0.165	0.128	0.064	0.044
336.8	0.17	0.131	0.064	0.049	0.165	0.128	0.064	0.044
337	0.167	0.128	0.062	0.048	0.165	0.128	0.064	0.044
337.2	0.165	0.128	0.062	0.046	0.165	0.128	0.064	0.044
337.4	0.167	0.13	0.065	0.048	0.165	0.128	0.064	0.044
337.6	0.173	0.136	0.068	0.054	0.165	0.128	0.064	0.044
337.8	0.172	0.13	0.065	0.05	0.165	0.128	0.064	0.044
338	0.164	0.12	0.062	0.044	0.165	0.128	0.064	0.044
338.2	0.161	0.117	0.063	0.044	0.165	0.128	0.064	0.044
338.4	0.165	0.123	0.066	0.046	0.165	0.128	0.064	0.044
338.6	0.167	0.123	0.063	0.045	0.165	0.129	0.064	0.044
338.8	0.166	0.119	0.062	0.045	0.165	0.129	0.064	0.044
339	0.162	0.118	0.061	0.041	0.165	0.129	0.064	0.044
339.2	0.161	0.121	0.062	0.04	0.165	0.129	0.065	0.044
339.4	0.164	0.128	0.067	0.046	0.166	0.129	0.065	0.044
339.6	0.166	0.132	0.067	0.048	0.166	0.129	0.065	0.044
339.8	0.163	0.128	0.064	0.044	0.166	0.129	0.065	0.044
340	0.16	0.124	0.064	0.042	0.166	0.129	0.065	0.044
340.2	0.159	0.128	0.067	0.044	0.166	0.129	0.065	0.044
340.4	0.165	0.136	0.069	0.048	0.166	0.129	0.065	0.044
340.6	0.171	0.136	0.069	0.051	0.166	0.129	0.065	0.044
340.8	0.17	0.134	0.067	0.05	0.166	0.129	0.065	0.044
341	0.166	0.131	0.067	0.048	0.166	0.129	0.065	0.044
341.2	0.168	0.131	0.07	0.05	0.166	0.129	0.065	0.044
341.4	0.172	0.135	0.072	0.054	0.166	0.129	0.065	0.044
341.6	0.174	0.133	0.07	0.053	0.166	0.129	0.065	0.044
341.8	0.168	0.123	0.065	0.047	0.166	0.129	0.065	0.044
342	0.163	0.116	0.064	0.044	0.166	0.129	0.065	0.044
342.2	0.165	0.12	0.066	0.044	0.166	0.129	0.065	0.044
342.4	0.169	0.123	0.066	0.045	0.166	0.129	0.065	0.044
342.6	0.169	0.121	0.064	0.046	0.166	0.129	0.065	0.044
342.8	0.165	0.119	0.063	0.043	0.166	0.129	0.065	0.044
343	0.162	0.119	0.063	0.04	0.166	0.129	0.065	0.044
343.2	0.162	0.123	0.066	0.043	0.166	0.129	0.065	0.044
343.4	0.164	0.128	0.068	0.046	0.167	0.129	0.065	0.044
343.6	0.164	0.127	0.066	0.044	0.167	0.13	0.065	0.044
343.8	0.162	0.123	0.064	0.042	0.167	0.13	0.065	0.044
344	0.158	0.123	0.064	0.042	0.167	0.13	0.065	0.044
344.2	0.162	0.13	0.067	0.046	0.167	0.13	0.065	0.044
344.4	0.169	0.135	0.069	0.051	0.167	0.13	0.065	0.045
344.6	0.17	0.134	0.068	0.052	0.167	0.13	0.065	0.045
344.8	0.165	0.129	0.066	0.047	0.167	0.13	0.065	0.045
345	0.162	0.126	0.067	0.046	0.167	0.13	0.065	0.045
345.2	0.165	0.129	0.07	0.049	0.167	0.13	0.065	0.045
345.4	0.168	0.13	0.068	0.048	0.167	0.13	0.065	0.045
345.6	0.166	0.123	0.063	0.044	0.167	0.13	0.065	0.045
345.8	0.162	0.117	0.061	0.041	0.167	0.13	0.065	0.045
346	0.161	0.118	0.062	0.039	0.167	0.13	0.065	0.045
346.2	0.165	0.124	0.064	0.041	0.167	0.13	0.065	0.045
346.4	0.169	0.126	0.065	0.045	0.167	0.13	0.065	0.045
346.6	0.167	0.124	0.062	0.043	0.167	0.13	0.065	0.045
346.8	0.163	0.12	0.061	0.038	0.167	0.13	0.065	0.045
347	0.162	0.122	0.063	0.041	0.167	0.13	0.065	0.045
347.2	0.164	0.126	0.065	0.043	0.167	0.13	0.065	0.045
347.4	0.166	0.127	0.064	0.043	0.168	0.13	0.065	0.045
347.6	0.166	0.123	0.062	0.042	0.168	0.13	0.065	0.045
347.8	0.161	0.121	0.061	0.041	0.168	0.13	0.065	0.045
348	0.161	0.123	0.062	0.042	0.168	0.13	0.065	0.045
348.2	0.168	0.13	0.066	0.048	0.168	0.13	0.065	0.045
348.4	0.172	0.132	0.067	0.052	0.168	0.13	0.065	0.045
348.6	0.168	0.126	0.063	0.046	0.168	0.131	0.065	0.045
348.8	0.161	0.118	0.062	0.042	0.168	0.131	0.066	0.045
349	0.162	0.12	0.066	0.045	0.168	0.131	0.066	0.045
349.2	0.167	0.124	0.067	0.046	0.168	0.131	0.066	0.045
349.4	0.167	0.122	0.063	0.044	0.168	0.131	0.066	0.045
349.6	0.165	0.117	0.062	0.042	0.168	0.131	0.066	0.045
349.8	0.163	0.118	0.063	0.04	0.168	0.131	0.066	0.045
350	0.166	0.124	0.066	0.042	0.168	0.131	0.066	0.045
350.2	0.171	0.131	0.069	0.048	0.168	0.131	0.066	0.045
350.4	0.172	0.132	0.068	0.048	0.168	0.131	0.066	0.045
350.6	0.168	0.128	0.065	0.044	0.168	0.131	0.066	0.045
350.8	0.165	0.125	0.066	0.043	0.168	0.131	0.066	0.045
351	0.166	0.131	0.069	0.046	0.168	0.131	0.066	0.045
351.2	0.17	0.135	0.069	0.047	0.168	0.131	0.066	0.045
351.4	0.172	0.133	0.067	0.048	0.169	0.131	0.066	0.045
351.6	0.168	0.13	0.066	0.047	0.169	0.131	0.066	0.045
351.8	0.167	0.132	0.067	0.047	0.169	0.131	0.066	0.045
352	0.171	0.135	0.069	0.05	0.169	0.131	0.066	0.045
352.2	0.175	0.14	0.071	0.055	0.169	0.131	0.066	0.045
352.4	0.174	0.134	0.068	0.051	0.169	0.131	0.066	0.045
352.6	0.167	0.125	0.065	0.045	0.169	0.131	0.066	0.045
352.8	0.164	0.122	0.066	0.045	0.169	0.131	0.066	0.045
353	0.168	0.128	0.068	0.047	0.169	0.131	0.066	0.045
353.2	0.171	0.127	0.065	0.046	0.169	0.131	0.066	0.045
353.4	0.169	0.122	0.062	0.044	0.169	0.131	0.066	0.045
353.6	0.166	0.121	0.063	0.042	0.169	0.131	0.066	0.045
353.8	0.166	0.125	0.065	0.042	0.169	0.132	0.066	0.045
354	0.17	0.131	0.068	0.047	0.169	0.132	0.066	0.045
354.2	0.171	0.133	0.069	0.048	0.169	0.132	0.066	0.045
354.4	0.168	0.129	0.065	0.044	0.169	0.132	0.066	0.045
354.6	0.163	0.125	0.065	0.042	0.169	0.132	0.066	0.045
354.8	0.161	0.127	0.067	0.043	0.169	0.132	0.066	0.045
355	0.166	0.135	0.069	0.046	0.169	0.132	0.066	0.045
355.2	0.172	0.134	0.069	0.05	0.169	0.132	0.066	0.045
355.4	0.169	0.131	0.067	0.049	0.17	0.132	0.066	0.045
355.6	0.166	0.13	0.067	0.047	0.17	0.132	0.066	0.045
355.8	0.168	0.133	0.07	0.05	0.17	0.132	0.066	0.045
356	0.172	0.136	0.071	0.054	0.17	0.132	0.066	0.045
356.2	0.173	0.134	0.069	0.051	0.17	0.132	0.066	0.045
356.4	0.168	0.123	0.064	0.046	0.17	0.132	0.066	0.045
356.6	0.163	0.118	0.064	0.044	0.17	0.132	0.066	0.045
356.8	0.166	0.122	0.065	0.044	0.17	0.132	0.066	0.045
357	0.17	0.123	0.063	0.044	0.17	0.132	0.066	0.045
357.2	0.17	0.12	0.061	0.044	0.17	0.132	0.066	0.045
357.4	0.166	0.117	0.061	0.04	0.17	0.132	0.066	0.045
357.6	0.163	0.118	0.062	0.038	0.17	0.132	0.066	0.045
357.8	0.166	0.125	0.066	0.043	0.17	0.132	0.066	0.045
358	0.167	0.127	0.067	0.044	0.17	0.132	0.066	0.046
358.2	0.165	0.124	0.065	0.04	0.17	0.132	0.066	0.046
358.4	0.161	0.12	0.064	0.039	0.17	0.132	0.066	0.046
358.6	0.157	0.121	0.066	0.039	0.17	0.132	0.066	0.046
358.8	0.161	0.128	0.068	0.043	0.17	0.132	0.066	0.046
359	0.169	0.132	0.07	0.048	0.17	0.132	0.067	0.046
359.2	0.168	0.13	0.067	0.048	0.17	0.133	0.067	0.046
359.4	0.163	0.126	0.066	0.044	0.17	0.133	0.067	0.046
359.6	0.165	0.129	0.07	0.047	0.171	0.133	0.067	0.046
359.8	0.17	0.133	0.071	0.052	0.171	0.133	0.067	0.046
360	0.171	0.131	0.068	0.048	0.171	0.133	0.067	0.046
360.2	0.166	0.122	0.063	0.043	0.171	0.133	0.067	0.046
360.4	0.161	0.116	0.062	0.041	0.171	0.133	0.067	0.046
360.6	0.163	0.121	0.064	0.041	0.171	0.133	0.067	0.046
360.8	0.168	0.125	0.063	0.042	0.171	0.133	0.067	0.046
361	0.171	0.125	0.063	0.044	0.171	0.133	0.067	0.046
361.2	0.168	0.123	0.063	0.042	0.171	0.133	0.067	0.046
361.4	0.164	0.122	0.064	0.039	0.171	0.133	0.067	0.046
361.6	0.166	0.128	0.068	0.043	0.171	0.133	0.067	0.046
361.8	0.169	0.133	0.07	0.046	0.171	0.133	0.067	0.046
362	0.169	0.131	0.068	0.044	0.171	0.133	0.067	0.046
362.2	0.167	0.127	0.067	0.043	0.171	0.133	0.067	0.046
362.4	0.164	0.128	0.068	0.044	0.171	0.133	0.067	0.046
362.6	0.168	0.134	0.07	0.046	0.171	0.133	0.067	0.046
362.8	0.175	0.138	0.071	0.052	0.171	0.133	0.067	0.046
363	0.177	0.137	0.071	0.053	0.171	0.133	0.067	0.046
363.2	0.172	0.131	0.068	0.048	0.171	0.133	0.067	0.046
363.4	0.169	0.128	0.069	0.047	0.171	0.133	0.067	0.046
363.6	0.173	0.132	0.072	0.052	0.171	0.133	0.067	0.046
363.8	0.175	0.132	0.07	0.05	0.172	0.133	0.067	0.046
364	0.172	0.125	0.065	0.045	0.172	0.133	0.067	0.046
364.2	0.167	0.118	0.063	0.043	0.172	0.133	0.067	0.046
364.4	0.167	0.121	0.065	0.043	0.172	0.133	0.067	0.046
364.6	0.171	0.125	0.066	0.045	0.172	0.134	0.067	0.046
364.8	0.174	0.128	0.066	0.048	0.172	0.134	0.067	0.046
365	0.173	0.127	0.067	0.047	0.172	0.134	0.067	0.046
365.2	0.167	0.123	0.066	0.042	0.172	0.134	0.067	0.046
365.4	0.166	0.126	0.07	0.044	0.172	0.134	0.067	0.046
365.6	0.169	0.134	0.073	0.049	0.172	0.134	0.067	0.046
365.8	0.172	0.137	0.072	0.049	0.172	0.134	0.067	0.046
366	0.172	0.135	0.071	0.049	0.172	0.134	0.067	0.046
366.2	0.167	0.134	0.071	0.047	0.172	0.134	0.067	0.046
366.4	0.17	0.141	0.074	0.05	0.172	0.134	0.067	0.046
366.6	0.177	0.145	0.076	0.054	0.172	0.134	0.067	0.046
366.8	0.18	0.147	0.076	0.056	0.172	0.134	0.067	0.046
367	0.177	0.141	0.073	0.052	0.172	0.134	0.067	0.046
367.2	0.171	0.135	0.072	0.048	0.172	0.134	0.067	0.046
367.4	0.17	0.135	0.074	0.05	0.172	0.134	0.067	0.046
367.6	0.175	0.14	0.073	0.051	0.172	0.134	0.067	0.046
367.8	0.176	0.135	0.068	0.048	0.172	0.134	0.067	0.046
368	0.172	0.128	0.065	0.046	0.173	0.134	0.067	0.046
368.2	0.17	0.126	0.066	0.043	0.173	0.134	0.067	0.046
368.4	0.172	0.13	0.067	0.045	0.173	0.134	0.067	0.046
368.6	0.177	0.133	0.068	0.049	0.173	0.134	0.067	0.046
368.8	0.176	0.132	0.068	0.048	0.173	0.134	0.067	0.046
369	0.171	0.126	0.067	0.043	0.173	0.134	0.067	0.046
369.2	0.168	0.125	0.068	0.043	0.173	0.134	0.067	0.046
369.4	0.168	0.133	0.071	0.047	0.173	0.134	0.068	0.046
369.6	0.174	0.141	0.073	0.05	0.173	0.134	0.068	0.046
369.8	0.177	0.14	0.072	0.051	0.173	0.134	0.068	0.046
370	0.172	0.138	0.071	0.049	0.173	0.135	0.068	0.046
370.2	0.173	0.141	0.073	0.049	0.173	0.135	0.068	0.046
370.4	0.18	0.147	0.078	0.055	0.173	0.135	0.068	0.046
370.6	0.185	0.15	0.078	0.059	0.173	0.135	0.068	0.046
370.8	0.184	0.146	0.075	0.055	0.173	0.135	0.068	0.046
371	0.178	0.139	0.073	0.051	0.173	0.135	0.068	0.046
371.2	0.176	0.138	0.073	0.052	0.173	0.135	0.068	0.046
371.4	0.18	0.141	0.073	0.052	0.173	0.135	0.068	0.046
371.6	0.185	0.142	0.072	0.053	0.173	0.135	0.068	0.046
371.8	0.181	0.134	0.067	0.05	0.173	0.135	0.068	0.046
372	0.176	0.13	0.066	0.045	0.173	0.135	0.068	0.047
372.2	0.175	0.13	0.066	0.044	0.173	0.135	0.068	0.047
372.4	0.179	0.135	0.068	0.049	0.174	0.135	0.068	0.047
372.6	0.178	0.134	0.067	0.048	0.174	0.135	0.068	0.047
372.8	0.173	0.126	0.065	0.043	0.174	0.135	0.068	0.047
373	0.168	0.123	0.065	0.042	0.174	0.135	0.068	0.047
373.2	0.165	0.129	0.066	0.043	0.174	0.135	0.068	0.047
373.4	0.169	0.135	0.068	0.046	0.174	0.135	0.068	0.047
373.6	0.174	0.137	0.069	0.049	0.174	0.135	0.068	0.047
373.8	0.171	0.135	0.066	0.047	0.174	0.135	0.068	0.047
374	0.167	0.135	0.067	0.044	0.174	0.135	0.068	0.047
374.2	0.17	0.138	0.07	0.048	0.174	0.135	0.068	0.047
374.4	0.176	0.145	0.073	0.054	0.174	0.135	0.068	0.047
374.6	0.176	0.142	0.07	0.05	0.174	0.135	0.068	0.047
374.8	0.17	0.133	0.066	0.045	0.174	0.135	0.068	0.047
375	0.168	0.132	0.068	0.046	0.174	0.135	0.068	0.047
375.2	0.172	0.137	0.069	0.047	0.174	0.135	0.068	0.047
375.4	0.176	0.138	0.067	0.047	0.174	0.135	0.068	0.047
375.6	0.177	0.135	0.066	0.048	0.174	0.136	0.068	0.047
375.8	0.172	0.13	0.064	0.043	0.174	0.136	0.068	0.047
376	0.171	0.13	0.066	0.043	0.174	0.136	0.068	0.047
376.2	0.175	0.135	0.069	0.048	0.174	0.136	0.068	0.047
376.4	0.177	0.14	0.071	0.05	0.174	0.136	0.068	0.047
376.6	0.175	0.134	0.068	0.047	0.174	0.136	0.068	0.047
376.8	0.172	0.13	0.068	0.046	0.175	0.136	0.068	0.047
377	0.17	0.136	0.071	0.047	0.175	0.136	0.068	0.047
377.2	0.175	0.142	0.073	0.05	0.175	0.136	0.068	0.047
377.4	0.182	0.145	0.074	0.055	0.175	0.136	0.068	0.047
377.6	0.181	0.146	0.073	0.055	0.175	0.136	0.068	0.047
377.8	0.177	0.142	0.071	0.051	0.175	0.136	0.068	0.047
378	0.176	0.143	0.074	0.051	0.175	0.136	0.068	0.047
378.2	0.179	0.147	0.075	0.055	0.175	0.136	0.068	0.047
378.4	0.181	0.147	0.073	0.053	0.175	0.136	0.068	0.047
378.6	0.175	0.135	0.067	0.046	0.175	0.136	0.068	0.047
378.8	0.169	0.129	0.066	0.043	0.175	0.136	0.068	0.047
379	0.171	0.132	0.068	0.044	0.175	0.136	0.068	0.047
379.2	0.177	0.137	0.07	0.047	0.175	0.136	0.068	0.047
379.4	0.179	0.135	0.067	0.047	0.175	0.136	0.068	0.047
379.6	0.175	0.131	0.066	0.043	0.175	0.136	0.068	0.047
379.8	0.17	0.127	0.065	0.04	0.175	0.136	0.068	0.047
380	0.172	0.131	0.069	0.043	0.175	0.136	0.068	0.047
380.2	0.172	0.137	0.07	0.046	0.175	0.136	0.069	0.047
380.4	0.173	0.133	0.068	0.044	0.175	0.136	0.069	0.047
380.6	0.17	0.127	0.065	0.042	0.175	0.136	0.069	0.047
380.8	0.166	0.13	0.067	0.041	0.175	0.136	0.069	0.047
381	0.17	0.137	0.069	0.045	0.175	0.136	0.069	0.047
381.2	0.177	0.141	0.07	0.049	0.176	0.137	0.069	0.047
381.4	0.178	0.142	0.068	0.051	0.176	0.137	0.069	0.047
381.6	0.173	0.136	0.066	0.046	0.176	0.137	0.069	0.047
381.8	0.17	0.134	0.067	0.045	0.176	0.137	0.069	0.047
382	0.173	0.138	0.07	0.049	0.176	0.137	0.069	0.047
382.2	0.176	0.138	0.068	0.048	0.176	0.137	0.069	0.047
382.4	0.175	0.133	0.065	0.046	0.176	0.137	0.069	0.047
382.6	0.169	0.125	0.062	0.042	0.176	0.137	0.069	0.047
382.8	0.168	0.126	0.064	0.041	0.176	0.137	0.069	0.047
383	0.173	0.131	0.065	0.044	0.176	0.137	0.069	0.047
383.2	0.178	0.134	0.067	0.049	0.176	0.137	0.069	0.047
383.4	0.174	0.13	0.064	0.044	0.176	0.137	0.069	0.047
383.6	0.169	0.123	0.063	0.039	0.176	0.137	0.069	0.047
383.8	0.167	0.126	0.066	0.042	0.176	0.137	0.069	0.047
384	0.171	0.133	0.069	0.045	0.176	0.137	0.069	0.047
384.2	0.171	0.132	0.067	0.044	0.176	0.137	0.069	0.047
384.4	0.171	0.128	0.067	0.044	0.176	0.137	0.069	0.047
384.6	0.166	0.13	0.066	0.044	0.176	0.137	0.069	0.047
384.8	0.167	0.135	0.069	0.045	0.176	0.137	0.069	0.047
385	0.175	0.143	0.072	0.052	0.176	0.137	0.069	0.047
385.2	0.179	0.147	0.073	0.055	0.176	0.137	0.069	0.047
385.4	0.175	0.142	0.07	0.051	0.176	0.137	0.069	0.047
385.6	0.17	0.137	0.071	0.048	0.176	0.137	0.069	0.047
385.8	0.172	0.142	0.075	0.053	0.177	0.137	0.069	0.047
386	0.177	0.145	0.075	0.054	0.177	0.137	0.069	0.047
386.2	0.179	0.143	0.072	0.052	0.177	0.137	0.069	0.047
386.4	0.176	0.137	0.07	0.05	0.177	0.137	0.069	0.047
386.6	0.172	0.135	0.068	0.046	0.177	0.137	0.069	0.048
386.8	0.174	0.136	0.068	0.045	0.177	0.137	0.069	0.048
387	0.179	0.141	0.07	0.05	0.177	0.137	0.069	0.048
387.2	0.18	0.14	0.069	0.049	0.177	0.138	0.069	0.048
387.4	0.175	0.132	0.066	0.043	0.177	0.138	0.069	0.048
387.6	0.171	0.13	0.066	0.043	0.177	0.138	0.069	0.048
387.8	0.172	0.138	0.069	0.046	0.177	0.138	0.069	0.048
388	0.176	0.14	0.068	0.047	0.177	0.138	0.069	0.048
388.2	0.177	0.138	0.067	0.048	0.177	0.138	0.069	0.048
388.4	0.174	0.137	0.066	0.047	0.177	0.138	0.069	0.048
388.6	0.172	0.139	0.067	0.046	0.177	0.138	0.069	0.048
388.8	0.175	0.141	0.07	0.049	0.177	0.138	0.069	0.048
389	0.179	0.147	0.072	0.054	0.177	0.138	0.069	0.048
389.2	0.179	0.143	0.069	0.052	0.177	0.138	0.069	0.048
389.4	0.173	0.134	0.066	0.047	0.177	0.138	0.069	0.048
389.6	0.17	0.131	0.067	0.047	0.177	0.138	0.069	0.048
389.8	0.175	0.137	0.069	0.049	0.177	0.138	0.069	0.048
390	0.18	0.137	0.068	0.05	0.177	0.138	0.069	0.048
390.2	0.179	0.133	0.066	0.048	0.177	0.138	0.069	0.048
390.4	0.174	0.128	0.063	0.043	0.178	0.138	0.069	0.048
390.6	0.174	0.131	0.065	0.042	0.178	0.138	0.069	0.048
390.8	0.176	0.134	0.066	0.045	0.178	0.138	0.069	0.048
391	0.178	0.137	0.067	0.045	0.178	0.138	0.069	0.048
391.2	0.175	0.13	0.063	0.04	0.178	0.138	0.07	0.048
391.4	0.168	0.126	0.062	0.038	0.178	0.138	0.07	0.048
391.6	0.166	0.13	0.064	0.039	0.178	0.138	0.07	0.048
391.8	0.17	0.138	0.066	0.042	0.178	0.138	0.07	0.048
392	0.175	0.14	0.067	0.045	0.178	0.138	0.07	0.048
392.2	0.174	0.14	0.066	0.046	0.178	0.138	0.07	0.048
392.4	0.168	0.137	0.065	0.042	0.178	0.138	0.07	0.048
392.6	0.168	0.139	0.069	0.044	0.178	0.138	0.07	0.048
392.8	0.171	0.143	0.07	0.049	0.178	0.138	0.07	0.048
393	0.173	0.144	0.07	0.049	0.178	0.139	0.07	0.048
393.2	0.171	0.136	0.066	0.046	0.178	0.139	0.07	0.048
393.4	0.165	0.129	0.065	0.043	0.178	0.139	0.07	0.048
393.6	0.166	0.131	0.066	0.043	0.178	0.139	0.07	0.048
393.8	0.174	0.138	0.069	0.048	0.178	0.139	0.07	0.048
394	0.177	0.137	0.067	0.049	0.178	0.139	0.07	0.048
394.2	0.172	0.131	0.065	0.044	0.178	0.139	0.07	0.048
394.4	0.169	0.128	0.065	0.041	0.178	0.139	0.07	0.048
394.6	0.169	0.129	0.067	0.043	0.178	0.139	0.07	0.048
394.8	0.171	0.133	0.066	0.043	0.178	0.139	0.07	0.048
395	0.171	0.13	0.065	0.041	0.178	0.139	0.07	0.048
395.2	0.167	0.126	0.063	0.039	0.179	0.139	0.07	0.048
395.4	0.165	0.129	0.063	0.039	0.179	0.139	0.07	0.048
395.6	0.168	0.137	0.066	0.041	0.179	0.139	0.07	0.048
395.8	0.174	0.144	0.07	0.047	0.179	0.139	0.07	0.048
396	0.176	0.147	0.069	0.05	0.179	0.139	0.07	0.048
396.2	0.172	0.142	0.067	0.045	0.179	0.139	0.07	0.048
396.4	0.169	0.141	0.069	0.045	0.179	0.139	0.07	0.048
396.6	0.172	0.146	0.073	0.05	0.179	0.139	0.07	0.048
396.8	0.175	0.147	0.071	0.05	0.179	0.139	0.07	0.048
397	0.176	0.143	0.07	0.049	0.179	0.139	0.07	0.048
397.2	0.171	0.136	0.067	0.046	0.179	0.139	0.07	0.048
397.4	0.168	0.135	0.067	0.043	0.179	0.139	0.07	0.048
397.6	0.174	0.14	0.069	0.046	0.179	0.139	0.07	0.048
397.8	0.179	0.142	0.071	0.05	0.179	0.139	0.07	0.048
398	0.173	0.135	0.067	0.044	0.179	0.139	0.07	0.048
398.2	0.167	0.126	0.064	0.038	0.179	0.139	0.07	0.048
398.4	0.164	0.126	0.066	0.039	0.179	0.139	0.07	0.048
398.6	0.165	0.131	0.067	0.041	0.179	0.139	0.07	0.048
398.8	0.169	0.132	0.066	0.041	0.179	0.139	0.07	0.048
399	0.167	0.128	0.065	0.041	0.179	0.14	0.07	0.048
399.2	0.162	0.13	0.063	0.04	0.179	0.14	0.07	0.048
399.4	0.163	0.134	0.065	0.041	0.179	0.14	0.07	0.048
[truncated: 2,477 more rows]

## Sheet: Fig1d
FZD3 CRD, Nb8-Wnt5a competion
time(s)	response 256 nM	response 256 nM
0	-0.803	-0.376
0.2	-0.802	-0.377
0.401	-0.801	-0.375
0.601	-0.81	-0.375
0.801	-0.808	-0.374
1	-0.81	-0.377
1.2	-0.814	-0.376
1.4	-0.81	-0.372
1.6	-0.816	-0.372
1.801	-0.817	-0.374
2	-0.814	-0.37
2.2	-0.817	-0.375
2.4	-0.817	-0.372
2.601	-0.818	-0.37
2.801	-0.817	-0.372
3.001	-0.815	-0.37
3.2	-0.818	-0.372
3.401	-0.818	-0.368
3.601	-0.822	-0.367
3.8	-0.817	-0.37
4	-0.822	-0.371
4.201	-0.823	-0.373
4.4	-0.822	-0.371
4.601	-0.826	-0.372
4.8	-0.823	-0.369
5	-0.822	-0.372
5.2	-0.825	-0.366
5.4	-0.825	-0.369
5.6	-0.828	-0.372
5.8	-0.828	-0.365
6.001	-0.828	-0.368
6.2	-0.827	-0.367
6.4	-0.825	-0.364
6.601	-0.831	-0.364
6.801	-0.83	-0.37
7.001	-0.828	-0.365
7.201	-0.829	-0.367
7.4	-0.831	-0.365
7.6	-0.832	-0.366
7.8	-0.835	-0.368
8.001	-0.831	-0.366
8.201	-0.831	-0.366
8.401	-0.834	-0.37
8.601	-0.832	-0.365
8.801	-0.833	-0.371
9.001	-0.834	-0.368
9.2	-0.835	-0.366
9.4	-0.836	-0.371
9.6	-0.838	-0.363
9.8	-0.83	-0.366
10	-0.838	-0.365
10.2	-0.837	-0.365
10.401	-0.835	-0.366
10.601	-0.835	-0.366
10.8	-0.837	-0.366
11	-0.839	-0.364
11.2	-0.837	-0.368
11.4	-0.839	-0.361
11.6	-0.84	-0.368
11.801	-0.834	-0.367
12.001	-0.843	-0.366
12.2	-0.841	-0.363
12.401	-0.842	-0.364
12.601	-0.838	-0.368
12.801	-0.838	-0.366
13.001	-0.84	-0.364
13.2	-0.836	-0.364
13.401	-0.836	-0.363
13.601	-0.842	-0.363
13.8	-0.841	-0.362
14	-0.838	-0.368
14.2	-0.84	-0.36
14.401	-0.841	-0.367
14.601	-0.839	-0.363
14.8	-0.838	-0.366
15.001	-0.84	-0.366
15.201	-0.842	-0.366
15.4	-0.837	-0.363
15.6	-0.838	-0.363
15.801	-0.842	-0.364
16	-0.841	-0.369
16.2	-0.841	-0.366
16.401	-0.838	-0.365
16.601	-0.844	-0.359
16.8	-0.842	-0.363
17.001	-0.84	-0.365
17.2	-0.842	-0.366
17.401	-0.842	-0.362
17.601	-0.84	-0.364
17.801	-0.841	-0.365
18.001	-0.844	-0.364
18.2	-0.839	-0.36
18.4	-0.847	-0.366
18.601	-0.842	-0.366
18.801	-0.841	-0.36
19	-0.841	-0.366
19.2	-0.839	-0.367
19.401	-0.843	-0.361
19.601	-0.844	-0.365
19.8	-0.842	-0.361
20	-0.846	-0.36
20.2	-0.844	-0.358
20.401	-0.84	-0.361
20.6	-0.84	-0.362
20.8	-0.848	-0.362
21	-0.84	-0.363
21.201	-0.842	-0.369
21.4	-0.84	-0.361
21.601	-0.841	-0.365
21.801	-0.839	-0.363
22	-0.841	-0.365
22.2	-0.839	-0.363
22.401	-0.85	-0.362
22.601	-0.842	-0.361
22.801	-0.843	-0.36
23	-0.845	-0.363
23.2	-0.846	-0.36
23.4	-0.84	-0.359
23.601	-0.842	-0.366
23.801	-0.846	-0.359
24.001	-0.844	-0.363
24.201	-0.846	-0.364
24.401	-0.845	-0.36
24.6	-0.838	-0.363
24.8	-0.845	-0.362
25	-0.845	-0.36
25.2	-0.842	-0.361
25.401	-0.844	-0.362
25.601	-0.846	-0.362
25.8	-0.843	-0.362
26.001	-0.841	-0.362
26.201	-0.843	-0.365
26.4	-0.847	-0.359
26.601	-0.84	-0.362
26.801	-0.843	-0.359
27.001	-0.842	-0.361
27.2	-0.844	-0.36
27.4	-0.84	-0.363
27.601	-0.841	-0.358
27.801	-0.841	-0.36
28.001	-0.844	-0.358
28.201	-0.843	-0.36
28.4	-0.842	-0.36
28.6	-0.842	-0.361
28.801	-0.844	-0.363
29.001	-0.845	-0.361
29.2	-0.842	-0.358
29.401	-0.841	-0.358
29.601	-0.84	-0.358
29.801	-0.842	-0.357
30.001	-0.846	-0.363
30.201	-0.846	-0.361
30.4	-0.841	-0.36
30.601	-0.844	-0.361
30.8	-0.839	-0.36
31	-0.843	-0.359
31.201	-0.843	-0.359
31.4	-0.842	-0.356
31.601	-0.841	-0.363
31.801	-0.842	-0.36
32	-0.846	-0.359
32.201	-0.844	-0.357
32.4	-0.84	-0.36
32.6	-0.84	-0.359
32.8	-0.847	-0.359
33.001	-0.836	-0.36
33.201	-0.842	-0.357
33.4	-0.844	-0.358
33.6	-0.839	-0.364
33.8	-0.843	-0.362
34	-0.839	-0.362
34.201	-0.843	-0.36
34.401	-0.845	-0.363
34.6	-0.84	-0.36
34.8	-0.842	-0.357
35.001	-0.847	-0.363
35.2	-0.844	-0.359
35.4	-0.84	-0.362
35.6	-0.844	-0.356
35.8	-0.839	-0.36
36.001	-0.841	-0.358
36.201	-0.841	-0.36
36.4	-0.843	-0.36
36.6	-0.845	-0.36
36.801	-0.847	-0.357
37.001	-0.843	-0.356
37.2	-0.844	-0.363
37.401	-0.842	-0.358
37.601	-0.84	-0.355
37.8	-0.842	-0.355
38.001	-0.84	-0.36
38.201	-0.842	-0.358
38.4	-0.847	-0.357
38.601	-0.841	-0.359
38.801	-0.845	-0.358
39	-0.84	-0.36
39.2	-0.842	-0.361
39.4	-0.843	-0.363
39.601	-0.841	-0.363
39.801	-0.843	-0.357
40	-0.843	-0.354
40.2	-0.843	-0.359
40.401	-0.836	-0.352
40.601	-0.842	-0.357
40.801	-0.843	-0.36
41.001	-0.838	-0.361
41.2	-0.842	-0.361
41.401	-0.842	-0.358
41.6	-0.842	-0.356
41.8	-0.841	-0.358
42.001	-0.84	-0.357
42.201	-0.841	-0.356
42.401	-0.839	-0.36
42.601	-0.839	-0.357
42.8	-0.844	-0.358
43.001	-0.84	-0.357
43.2	-0.842	-0.36
43.4	-0.84	-0.356
43.601	-0.84	-0.358
43.801	-0.841	-0.359
44	-0.843	-0.358
44.2	-0.837	-0.356
44.4	-0.84	-0.361
44.6	-0.838	-0.356
44.8	-0.835	-0.354
45	-0.844	-0.359
45.2	-0.837	-0.359
45.4	-0.842	-0.356
45.6	-0.842	-0.356
45.801	-0.842	-0.358
46	-0.841	-0.358
46.2	-0.84	-0.357
46.401	-0.839	-0.36
46.6	-0.841	-0.361
46.8	-0.838	-0.355
47	-0.839	-0.355
47.2	-0.843	-0.36
47.4	-0.84	-0.359
47.601	-0.839	-0.364
47.8	-0.841	-0.358
48	-0.837	-0.358
48.2	-0.84	-0.356
48.4	-0.84	-0.356
48.6	-0.839	-0.357
48.8	-0.839	-0.357
49.001	-0.838	-0.359
49.201	-0.839	-0.357
49.4	-0.838	-0.357
49.601	-0.841	-0.356
49.8	-0.839	-0.356
50.001	-0.839	-0.356
50.2	-0.837	-0.36
50.401	-0.843	-0.357
50.601	-0.837	-0.355
50.8	-0.84	-0.355
51	-0.835	-0.358
51.2	-0.837	-0.353
51.401	-0.838	-0.357
51.6	-0.843	-0.358
51.8	-0.842	-0.359
52.001	-0.841	-0.357
52.2	-0.839	-0.357
52.401	-0.84	-0.355
52.601	-0.837	-0.358
52.801	-0.841	-0.356
53.001	-0.838	-0.356
53.2	-0.84	-0.36
53.4	-0.838	-0.36
53.601	-0.841	-0.358
53.8	-0.839	-0.358
54.001	-0.836	-0.357
54.201	-0.839	-0.358
54.401	-0.841	-0.354
54.6	-0.838	-0.354
54.8	-0.839	-0.36
55.001	-0.839	-0.356
55.2	-0.839	-0.357
55.4	-0.84	-0.356
55.601	-0.839	-0.362
55.801	-0.84	-0.358
56	-0.837	-0.359
56.201	-0.839	-0.356
56.4	-0.838	-0.356
56.601	-0.837	-0.358
56.801	-0.845	-0.358
57.001	-0.838	-0.351
57.201	-0.841	-0.356
57.4	-0.84	-0.362
57.601	-0.838	-0.357
57.8	-0.845	-0.358
58	-0.838	-0.356
58.201	-0.84	-0.357
58.4	-0.837	-0.36
58.6	-0.839	-0.36
58.8	-0.84	-0.356
59.001	-0.838	-0.358
59.2	-0.838	-0.357
59.401	-0.842	-0.358
59.601	-0.841	-0.357
59.8	-0.838	-0.356
60.001	-0.839	-0.356
60.2	-0.839	-0.359
60.401	-0.841	-0.358
60.601	-0.84	-0.36
60.801	-0.84	-0.36
61	-0.837	-0.353
61.201	-0.839	-0.356
61.4	-0.838	-0.359
61.601	-0.836	-0.353
61.801	-0.842	-0.36
62	-0.836	-0.36
62.201	-0.837	-0.359
62.401	-0.838	-0.356
62.601	-0.837	-0.353
62.8	-0.838	-0.356
63	-0.841	-0.359
63.2	-0.836	-0.359
63.401	-0.836	-0.361
63.6	-0.839	-0.357
63.8	-0.839	-0.358
64.001	-0.84	-0.358
64.201	-0.837	-0.359
64.401	-0.837	-0.358
64.6	-0.835	-0.357
64.801	-0.839	-0.354
65.001	-0.843	-0.356
65.201	-0.839	-0.355
65.401	-0.839	-0.354
65.6	-0.839	-0.359
65.8	-0.838	-0.357
66.001	-0.839	-0.358
66.2	-0.843	-0.357
66.4	-0.834	-0.356
66.6	-0.838	-0.359
66.8	-0.839	-0.357
67	-0.841	-0.353
67.2	-0.838	-0.358
67.4	-0.84	-0.358
67.6	-0.838	-0.352
67.801	-0.838	-0.356
68	-0.839	-0.354
68.2	-0.835	-0.36
68.4	-0.84	-0.358
68.6	-0.836	-0.36
68.8	-0.838	-0.358
69.001	-0.841	-0.358
69.2	-0.835	-0.354
69.401	-0.841	-0.356
69.6	-0.837	-0.355
69.801	-0.837	-0.356
70	-0.842	-0.358
70.2	-0.838	-0.355
70.4	-0.838	-0.355
70.6	-0.842	-0.355
70.801	-0.834	-0.355
71	-0.837	-0.357
71.201	-0.836	-0.359
71.4	-0.84	-0.356
71.6	-0.841	-0.354
71.8	-0.836	-0.358
72	-0.842	-0.359
72.201	-0.839	-0.358
72.4	-0.838	-0.355
72.6	-0.839	-0.358
72.801	-0.84	-0.36
73.001	-0.841	-0.358
73.2	-0.84	-0.356
73.4	-0.839	-0.355
73.601	-0.835	-0.357
73.8	-0.841	-0.36
74.001	-0.838	-0.356
74.2	-0.84	-0.354
74.4	-0.841	-0.354
74.601	-0.837	-0.356
74.8	-0.841	-0.354
75.001	-0.836	-0.356
75.201	-0.835	-0.358
75.401	-0.837	-0.356
75.601	-0.84	-0.354
75.8	-0.839	-0.357
76	-0.838	-0.352
76.201	-0.84	-0.357
76.401	-0.839	-0.355
76.601	-0.842	-0.357
76.801	-0.833	-0.354
77	-0.838	-0.359
77.2	-0.84	-0.355
77.401	-0.833	-0.358
77.6	-0.836	-0.361
77.8	-0.836	-0.357
78.001	-0.835	-0.354
78.201	-0.843	-0.354
78.401	-0.838	-0.359
78.601	-0.84	-0.357
78.8	-0.839	-0.36
79.001	-0.838	-0.36
79.2	-0.837	-0.359
79.4	-0.841	-0.358
79.601	-0.837	-0.353
79.801	-0.838	-0.354
80.001	-0.838	-0.357
80.201	-0.836	-0.354
80.4	-0.839	-0.353
80.6	-0.834	-0.356
80.801	-0.84	-0.358
81.001	-0.837	-0.356
81.201	-0.839	-0.357
81.4	-0.838	-0.355
81.601	-0.837	-0.36
81.8	-0.835	-0.358
82	-0.84	-0.356
82.2	-0.838	-0.357
82.4	-0.837	-0.356
82.601	-0.836	-0.354
82.8	-0.837	-0.358
83.001	-0.834	-0.35
83.2	-0.835	-0.356
83.4	-0.838	-0.359
83.6	-0.839	-0.355
83.801	-0.834	-0.353
84	-0.839	-0.356
84.201	-0.836	-0.356
84.401	-0.838	-0.357
84.6	-0.837	-0.36
84.8	-0.836	-0.358
85.001	-0.833	-0.357
85.2	-0.841	-0.357
85.4	-0.836	-0.353
85.601	-0.837	-0.36
85.8	-0.837	-0.358
86	-0.838	-0.356
86.2	-0.838	-0.354
86.401	-0.84	-0.359
86.6	-0.834	-0.356
86.801	-0.838	-0.355
87.002	-0.84	-0.358
87.201	-0.839	-0.361
87.4	-0.836	-0.357
87.6	-0.838	-0.355
87.801	-0.835	-0.359
88	-0.837	-0.355
88.201	-0.841	-0.354
88.401	-0.838	-0.354
88.601	-0.84	-0.358
88.8	-0.838	-0.357
89	-0.84	-0.355
89.201	-0.835	-0.357
89.4	-0.835	-0.36
89.6	-0.837	-0.361
89.8	-0.838	-0.356
90	-0.84	-0.358
90.201	-0.839	-0.352
90.401	-0.837	-0.356
90.6	-0.841	-0.359
90.801	-0.837	-0.354
91	-0.836	-0.354
91.201	-0.84	-0.359
91.401	-0.837	-0.36
91.6	-0.839	-0.353
91.801	-0.838	-0.355
92	-0.836	-0.355
92.201	-0.838	-0.354
92.401	-0.838	-0.359
92.601	-0.835	-0.36
92.8	-0.834	-0.353
93.001	-0.834	-0.357
93.201	-0.836	-0.356
93.4	-0.842	-0.36
93.601	-0.839	-0.355
93.8	-0.837	-0.356
94.001	-0.834	-0.357
94.2	-0.837	-0.355
94.4	-0.838	-0.357
94.601	-0.836	-0.357
94.801	-0.837	-0.356
95	-0.836	-0.355
95.2	-0.837	-0.358
95.4	-0.837	-0.351
95.6	-0.835	-0.356
95.801	-0.836	-0.357
96	-0.833	-0.36
96.2	-0.837	-0.359
96.401	-0.84	-0.357
96.6	-0.834	-0.353
96.8	-0.835	-0.354
97.001	-0.839	-0.357
97.201	-0.836	-0.352
97.4	-0.836	-0.353
97.601	-0.837	-0.355
97.8	-0.837	-0.357
98.001	-0.838	-0.357
98.2	-0.838	-0.356
98.401	-0.84	-0.357
98.6	-0.837	-0.359
98.801	-0.84	-0.36
99.001	-0.838	-0.355
99.2	-0.839	-0.355
99.4	-0.838	-0.358
99.601	-0.836	-0.358
99.8	-0.839	-0.36
100	-0.837	-0.355
100.2	-0.836	-0.356
100.401	-0.838	-0.357
100.6	-0.838	-0.353
100.801	-0.839	-0.357
101.001	-0.837	-0.358
101.2	-0.837	-0.355
101.4	-0.837	-0.357
101.6	-0.839	-0.356
101.8	-0.836	-0.354
102	-0.837	-0.358
102.201	-0.831	-0.355
102.4	-0.838	-0.358
102.6	-0.832	-0.357
102.801	-0.841	-0.358
103.001	-0.837	-0.357
103.2	-0.841	-0.356
103.4	-0.838	-0.355
103.601	-0.833	-0.359
103.8	-0.834	-0.355
104.001	-0.839	-0.36
104.201	-0.836	-0.354
104.401	-0.835	-0.359
104.6	-0.836	-0.356
104.801	-0.834	-0.36
105	-0.831	-0.357
105.2	-0.836	-0.355
105.4	-0.838	-0.356
105.601	-0.842	-0.355
105.801	-0.837	-0.357
106	-0.833	-0.359
106.2	-0.838	-0.358
106.4	-0.838	-0.357
106.601	-0.836	-0.354
106.801	-0.834	-0.357
107.001	-0.838	-0.355
107.201	-0.835	-0.355
107.4	-0.842	-0.354
107.6	-0.836	-0.356
107.801	-0.838	-0.356
108.001	-0.838	-0.356
108.2	-0.838	-0.359
108.4	-0.836	-0.356
108.6	-0.834	-0.356
108.801	-0.835	-0.355
109.001	-0.833	-0.357
109.201	-0.841	-0.359
109.4	-0.838	-0.358
109.6	-0.84	-0.354
109.8	-0.836	-0.358
110.001	-0.838	-0.357
110.2	-0.836	-0.354
110.401	-0.834	-0.359
110.6	-0.839	-0.357
110.801	-0.838	-0.355
111.001	-0.836	-0.353
111.2	-0.839	-0.354
111.4	-0.836	-0.36
111.6	-0.837	-0.356
111.801	-0.834	-0.356
112.001	-0.839	-0.356
112.201	-0.838	-0.355
112.4	-0.835	-0.358
112.601	-0.837	-0.357
112.801	-0.833	-0.358
113.001	-0.835	-0.355
113.201	-0.833	-0.355
113.4	-0.838	-0.359
113.6	-0.839	-0.357
113.801	-0.838	-0.357
114	-0.838	-0.358
114.201	-0.84	-0.354
114.4	-0.836	-0.353
114.6	-0.838	-0.355
114.8	-0.834	-0.359
115.001	-0.836	-0.354
115.2	-0.835	-0.358
115.401	-0.835	-0.356
115.601	-0.837	-0.359
115.801	-0.838	-0.356
116.001	-0.835	-0.356
116.2	-0.838	-0.355
116.4	-0.837	-0.353
116.6	-0.838	-0.354
116.801	-0.837	-0.358
117.001	-0.836	-0.352
117.2	-0.835	-0.357
117.4	-0.834	-0.357
117.601	-0.835	-0.355
117.801	-0.836	-0.357
118	-0.833	-0.355
118.201	-0.838	-0.355
118.401	-0.837	-0.354
118.6	-0.839	-0.357
118.8	-0.839	-0.352
119.001	-0.838	-0.356
119.2	-0.84	-0.354
119.4	-0.834	-0.355
119.6	-0.842	-0.357
119.801	-0.834	-0.354
120	-0.835	-0.356
120.2	-0.84	-0.352
120.4	-0.837	-0.356
120.6	-0.84	-0.354
120.8	-0.839	-0.36
121	-0.84	-0.356
121.2	-0.838	-0.357
121.4	-0.835	-0.354
121.6	-0.836	-0.354
121.801	-0.837	-0.355
122.001	-0.829	-0.356
122.2	-0.834	-0.358
122.401	-0.834	-0.356
122.601	-0.84	-0.355
122.8	-0.835	-0.357
123	-0.835	-0.355
123.2	-0.841	-0.356
123.4	-0.838	-0.355
123.601	-0.835	-0.355
123.8	-0.838	-0.357
124.001	-0.84	-0.359
124.2	-0.841	-0.357
124.4	-0.84	-0.355
124.6	-0.838	-0.357
124.8	-0.835	-0.354
125	-0.841	-0.354
125.201	-0.84	-0.355
125.4	-0.839	-0.354
125.601	-0.834	-0.356
125.801	-0.839	-0.358
126	-0.838	-0.352
126.201	-0.838	-0.362
126.4	-0.836	-0.35
126.601	-0.839	-0.357
126.8	-0.837	-0.357
127	-0.836	-0.352
127.2	-0.836	-0.356
127.401	-0.835	-0.358
127.601	-0.834	-0.354
127.801	-0.837	-0.356
128	-0.836	-0.354
128.2	-0.838	-0.357
128.4	-0.84	-0.357
128.601	-0.835	-0.355
128.801	-0.841	-0.355
129	-0.836	-0.355
129.2	-0.841	-0.353
129.4	-0.835	-0.354
129.601	-0.838	-0.359
129.801	-0.839	-0.351
130	-0.836	-0.358
130.2	-0.838	-0.357
130.401	-0.836	-0.356
130.6	-0.836	-0.355
130.801	-0.834	-0.357
131.001	-0.836	-0.356
131.2	-0.84	-0.357
131.4	-0.837	-0.357
131.601	-0.835	-0.355
131.801	-0.839	-0.358
132	-0.837	-0.355
132.2	-0.835	-0.354
132.4	-0.838	-0.352
132.6	-0.839	-0.357
132.801	-0.838	-0.356
133	-0.837	-0.357
133.2	-0.838	-0.356
133.401	-0.837	-0.357
133.6	-0.834	-0.355
133.801	-0.833	-0.357
134	-0.835	-0.357
134.201	-0.841	-0.358
134.401	-0.835	-0.358
134.6	-0.84	-0.359
134.8	-0.84	-0.357
135	-0.836	-0.357
135.201	-0.84	-0.359
135.4	-0.842	-0.355
135.601	-0.838	-0.355
135.8	-0.838	-0.359
136	-0.835	-0.354
136.2	-0.834	-0.357
136.401	-0.837	-0.356
136.601	-0.832	-0.354
136.801	-0.836	-0.353
137	-0.838	-0.356
137.201	-0.842	-0.352
137.401	-0.837	-0.358
137.6	-0.838	-0.355
137.801	-0.836	-0.354
138	-0.837	-0.352
138.201	-0.837	-0.354
138.4	-0.839	-0.357
138.6	-0.841	-0.357
138.801	-0.835	-0.357
139.001	-0.835	-0.352
139.2	-0.841	-0.359
139.401	-0.836	-0.36
139.601	-0.836	-0.356
139.801	-0.839	-0.355
140.001	-0.841	-0.356
140.2	-0.84	-0.359
140.4	-0.838	-0.355
140.6	-0.839	-0.352
140.8	-0.839	-0.362
141.001	-0.838	-0.359
141.201	-0.836	-0.355
141.4	-0.838	-0.358
141.601	-0.84	-0.354
141.801	-0.838	-0.357
142.001	-0.837	-0.358
142.2	-0.84	-0.357
142.4	-0.84	-0.358
142.6	-0.836	-0.356
142.8	-0.84	-0.36
143.001	-0.838	-0.355
143.201	-0.838	-0.356
143.401	-0.837	-0.356
143.601	-0.839	-0.357
143.8	-0.839	-0.354
144.001	-0.836	-0.355
144.2	-0.839	-0.354
144.401	-0.843	-0.354
144.6	-0.836	-0.353
144.8	-0.841	-0.358
145	-0.842	-0.356
145.201	-0.839	-0.358
145.401	-0.84	-0.354
145.6	-0.835	-0.355
145.8	-0.838	-0.358
146	-0.843	-0.36
146.201	-0.839	-0.357
146.401	-0.837	-0.361
146.6	-0.84	-0.354
146.801	-0.837	-0.356
147.001	-0.842	-0.357
147.201	-0.837	-0.356
147.401	-0.837	-0.359
147.6	-0.837	-0.356
147.8	-0.838	-0.355
148	-0.842	-0.351
148.201	-0.841	-0.356
148.4	-0.84	-0.36
148.6	-0.838	-0.358
148.801	-0.839	-0.354
149.001	-0.842	-0.359
149.2	-0.836	-0.358
149.4	-0.84	-0.357
149.602	-0.838	-0.354
149.8	-0.837	-0.354
150.001	-0.836	-0.356
150.2	-0.841	-0.355
150.4	-0.837	-0.355
150.6	-0.839	-0.356
150.8	-0.835	-0.356
151.001	-0.839	-0.354
151.201	-0.843	-0.356
151.401	-0.837	-0.36
151.601	-0.836	-0.356
151.801	-0.837	-0.354
152.001	-0.84	-0.353
152.2	-0.836	-0.355
152.4	-0.84	-0.355
152.601	-0.834	-0.358
152.801	-0.834	-0.352
153	-0.841	-0.359
153.2	-0.837	-0.353
153.4	-0.838	-0.355
153.6	-0.834	-0.361
153.801	-0.839	-0.358
154	-0.836	-0.353
154.2	-0.839	-0.36
154.4	-0.84	-0.361
154.601	-0.838	-0.363
154.8	-0.839	-0.358
155.001	-0.835	-0.356
155.2	-0.838	-0.355
155.401	-0.839	-0.358
155.6	-0.836	-0.358
155.801	-0.837	-0.358
156	-0.837	-0.354
156.2	-0.838	-0.356
156.4	-0.832	-0.359
156.6	-0.841	-0.359
156.8	-0.836	-0.357
157	-0.838	-0.358
157.201	-0.842	-0.357
157.401	-0.839	-0.357
157.6	-0.841	-0.357
157.801	-0.838	-0.356
158.001	-0.837	-0.358
158.201	-0.839	-0.358
158.401	-0.84	-0.358
158.6	-0.838	-0.358
158.801	-0.841	-0.363
159.001	-0.839	-0.354
159.201	-0.839	-0.354
159.401	-0.838	-0.356
159.6	-0.838	-0.356
159.8	-0.841	-0.356
160	-0.838	-0.36
160.201	-0.834	-0.359
160.401	-0.838	-0.358
160.601	-0.835	-0.358
160.8	-0.841	-0.359
161.001	-0.839	-0.358
161.2	-0.838	-0.359
161.401	-0.837	-0.35
161.601	-0.836	-0.362
161.8	-0.835	-0.358
162.001	-0.837	-0.357
162.2	-0.836	-0.354
162.401	-0.839	-0.357
162.6	-0.836	-0.358
162.8	-0.838	-0.356
163	-0.837	-0.358
163.201	-0.838	-0.357
163.401	-0.84	-0.36
163.601	-0.836	-0.356
163.8	-0.841	-0.358
164	-0.843	-0.355
164.2	-0.839	-0.357
164.401	-0.836	-0.358
164.6	-0.841	-0.356
164.8	-0.837	-0.356
165	-0.838	-0.359
165.201	-0.839	-0.357
165.401	-0.835	-0.359
165.601	-0.839	-0.358
165.801	-0.841	-0.355
166.001	-0.841	-0.358
166.2	-0.838	-0.354
166.4	-0.835	-0.355
166.601	-0.84	-0.357
166.801	-0.839	-0.357
167.001	-0.837	-0.36
167.2	-0.836	-0.36
167.401	-0.838	-0.357
167.6	-0.839	-0.359
167.8	-0.837	-0.355
168	-0.841	-0.358
168.2	-0.837	-0.356
168.4	-0.837	-0.356
168.6	-0.842	-0.36
168.8	-0.84	-0.357
169	-0.841	-0.36
169.201	-0.84	-0.357
169.4	-0.836	-0.356
169.601	-0.833	-0.358
169.8	-0.842	-0.353
170.001	-0.837	-0.359
170.2	-0.842	-0.357
170.401	-0.84	-0.357
170.601	-0.837	-0.36
170.8	-0.841	-0.357
171	-0.839	-0.359
171.201	-0.842	-0.356
171.401	-0.841	-0.356
171.6	-0.837	-0.357
171.8	-0.84	-0.364
172.001	-0.839	-0.361
172.201	-0.843	-0.357
172.401	-0.838	-0.354
172.6	-0.841	-0.356
172.8	-0.838	-0.357
173.001	-0.84	-0.356
173.2	-0.837	-0.361
173.401	-0.837	-0.361
173.6	-0.84	-0.363
173.8	-0.841	-0.355
174	-0.843	-0.357
174.2	-0.835	-0.357
174.401	-0.836	-0.356
174.6	-0.841	-0.361
174.8	-0.84	-0.361
175	-0.837	-0.357
175.201	-0.84	-0.358
175.4	-0.841	-0.357
175.6	-0.837	-0.356
175.8	-0.842	-0.356
176	-0.845	-0.356
176.2	-0.838	-0.356
176.401	-0.84	-0.355
176.6	-0.842	-0.358
176.8	-0.84	-0.359
177	-0.843	-0.36
177.201	-0.839	-0.36
177.401	-0.84	-0.361
177.6	-0.838	-0.361
177.8	-0.84	-0.357
178	-0.835	-0.356
178.2	-0.845	-0.358
178.4	-0.839	-0.36
178.601	-0.839	-0.356
178.8	-0.839	-0.361
179.001	-0.833	-0.357
179.201	-0.845	-0.357
179.401	-0.838	-0.36
179.6	-0.841	-0.355
179.801	-0.841	-0.358
180	-0.838	-0.357
180.201	-0.836	-0.36
180.4	-0.842	-0.357
180.601	-0.838	-0.361
180.801	-0.839	-0.353
181	-0.839	-0.358
181.201	-0.84	-0.359
181.4	-0.838	-0.361
181.601	-0.84	-0.355
181.8	-0.841	-0.359
182	-0.838	-0.356
182.2	-0.845	-0.357
182.401	-0.84	-0.357
182.601	-0.844	-0.358
182.8	-0.839	-0.36
183.001	-0.837	-0.357
183.2	-0.834	-0.359
183.401	-0.841	-0.358
183.601	-0.84	-0.358
183.801	-0.84	-0.353
184	-0.842	-0.359
184.2	-0.841	-0.359
184.4	-0.838	-0.354
184.601	-0.839	-0.356
184.8	-0.845	-0.356
185.001	-0.842	-0.356
185.2	-0.839	-0.36
185.401	-0.839	-0.359
185.601	-0.835	-0.362
185.8	-0.838	-0.359
186	-0.837	-0.363
186.201	-0.842	-0.358
186.401	-0.837	-0.358
186.601	-0.841	-0.355
186.8	-0.844	-0.354
187	-0.842	-0.357
187.2	-0.844	-0.362
187.401	-0.841	-0.361
187.601	-0.841	-0.359
187.8	-0.839	-0.357
188	-0.836	-0.357
188.2	-0.84	-0.358
188.401	-0.844	-0.359
188.601	-0.836	-0.36
188.801	-0.842	-0.355
189.001	-0.839	-0.358
189.2	-0.837	-0.361
189.4	-0.842	-0.356
189.6	-0.84	-0.359
189.801	-0.842	-0.36
190	-0.838	-0.361
190.201	-0.836	-0.359
190.401	-0.84	-0.357
190.601	-0.84	-0.358
190.801	-0.842	-0.358
191.001	-0.841	-0.358
191.2	-0.84	-0.356
191.4	-0.844	-0.361
191.6	-0.839	-0.355
191.8	-0.843	-0.359
192	-0.839	-0.357
192.201	-0.838	-0.359
192.401	-0.843	-0.358
192.601	-0.837	-0.353
192.8	-0.844	-0.359
193.001	-0.839	-0.359
193.201	-0.84	-0.363
193.401	-0.838	-0.36
193.6	-0.841	-0.356
193.801	-0.838	-0.358
194	-0.837	-0.358
194.201	-0.842	-0.353
194.401	-0.84	-0.36
194.6	-0.843	-0.356
194.8	-0.837	-0.356
195.001	-0.839	-0.358
195.201	-0.839	-0.357
195.401	-0.84	-0.361
195.601	-0.84	-0.358
195.8	-0.839	-0.354
196	-0.84	-0.364
196.2	-0.841	-0.358
196.4	-0.841	-0.359
196.6	-0.841	-0.36
196.8	-0.841	-0.356
197.001	-0.842	-0.357
197.201	-0.836	-0.36
197.4	-0.842	-0.358
197.601	-0.845	-0.357
197.801	-0.84	-0.362
198	-0.839	-0.357
198.201	-0.838	-0.356
198.401	-0.838	-0.358
198.601	-0.84	-0.359
198.8	-0.835	-0.361
199	-0.844	-0.357
199.201	-0.847	-0.358
199.401	-0.839	-0.358
199.6	-0.839	-0.359
199.8	-0.841	-0.358
200	-0.841	-0.356
200.2	-0.843	-0.359
200.4	-0.839	-0.358
200.6	-0.837	-0.358
200.801	-0.84	-0.361
201.001	-0.843	-0.355
201.201	-0.839	-0.359
201.4	-0.84	-0.357
201.6	-0.836	-0.356
201.8	-0.842	-0.355
202.001	-0.841	-0.361
202.201	-0.84	-0.358
202.401	-0.844	-0.357
202.6	-0.838	-0.358
202.8	-0.839	-0.355
203.001	-0.841	-0.363
203.201	-0.841	-0.355
203.4	-0.838	-0.361
203.601	-0.836	-0.361
203.801	-0.837	-0.357
204	-0.842	-0.358
204.201	-0.843	-0.357
204.401	-0.838	-0.361
204.601	-0.841	-0.36
204.8	-0.838	-0.357
205	-0.838	-0.36
205.2	-0.843	-0.357
205.4	-0.84	-0.356
205.6	-0.841	-0.353
205.8	-0.841	-0.358
206	-0.839	-0.361
206.2	-0.843	-0.356
206.401	-0.843	-0.356
206.6	-0.839	-0.355
206.801	-0.84	-0.359
207.002	-0.838	-0.359
207.2	-0.839	-0.357
207.4	-0.838	-0.357
207.601	-0.841	-0.358
207.8	-0.846	-0.36
208	-0.838	-0.356
208.2	-0.84	-0.36
208.401	-0.841	-0.358
208.601	-0.84	-0.357
208.801	-0.842	-0.357
209.001	-0.843	-0.359
209.2	-0.838	-0.356
209.4	-0.845	-0.36
209.601	-0.84	-0.357
209.8	-0.839	-0.359
210	-0.839	-0.357
210.201	-0.841	-0.358
210.4	-0.84	-0.356
210.601	-0.842	-0.357
210.801	-0.84	-0.357
211.001	-0.843	-0.359
211.2	-0.841	-0.356
211.401	-0.838	-0.359
211.601	-0.839	-0.359
211.801	-0.839	-0.358
212	-0.844	-0.358
212.2	-0.84	-0.354
212.4	-0.841	-0.358
212.601	-0.837	-0.361
212.8	-0.843	-0.354
213	-0.839	-0.356
213.2	-0.842	-0.358
213.401	-0.838	-0.356
213.6	-0.84	-0.359
213.8	-0.844	-0.357
214.001	-0.84	-0.358
214.201	-0.839	-0.361
214.401	-0.844	-0.359
214.6	-0.843	-0.359
214.8	-0.844	-0.361
215.001	-0.839	-0.36
215.2	-0.84	-0.359
215.401	-0.838	-0.357
215.601	-0.842	-0.357
215.801	-0.84	-0.357
216	-0.841	-0.36
216.201	-0.842	-0.356
216.401	-0.841	-0.358
216.6	-0.84	-0.358
216.801	-0.845	-0.357
217.001	-0.842	-0.361
217.2	-0.843	-0.363
217.401	-0.841	-0.358
217.6	-0.836	-0.36
217.8	-0.839	-0.362
218.001	-0.839	-0.355
218.2	-0.84	-0.359
218.401	-0.836	-0.355
218.6	-0.843	-0.358
218.801	-0.843	-0.357
219.001	-0.845	-0.356
219.2	-0.839	-0.363
219.4	-0.842	-0.359
219.6	-0.846	-0.364
219.8	-0.838	-0.358
220	-0.842	-0.357
220.2	-0.841	-0.36
220.401	-0.843	-0.359
220.601	-0.84	-0.356
220.801	-0.84	-0.36
221.001	-0.838	-0.36
221.201	-0.836	-0.357
221.401	-0.835	-0.359
221.601	-0.845	-0.357
221.8	-0.846	-0.359
222	-0.839	-0.355
222.2	-0.838	-0.354
222.401	-0.841	-0.359
222.6	-0.841	-0.355
222.801	-0.841	-0.359
223.001	-0.841	-0.358
223.2	-0.837	-0.36
223.4	-0.842	-0.36
223.6	-0.845	-0.36
223.8	-0.842	-0.355
224.001	-0.84	-0.359
224.2	-0.838	-0.356
224.4	-0.844	-0.358
224.601	-0.838	-0.361
224.8	-0.841	-0.36
225	-0.845	-0.359
225.2	-0.842	-0.356
225.4	-0.838	-0.36
225.6	-0.84	-0.359
225.801	-0.844	-0.355
226	-0.838	-0.356
226.201	-0.841	-0.362
226.401	-0.84	-0.36
226.601	-0.842	-0.354
226.801	-0.842	-0.36
227.001	-0.843	-0.357
227.201	-0.843	-0.357
227.401	-0.839	-0.361
227.601	-0.843	-0.361
227.801	-0.839	-0.357
228.001	-0.841	-0.355
228.201	-0.841	-0.357
228.401	-0.842	-0.359
228.6	-0.843	-0.358
228.801	-0.837	-0.36
229.001	-0.843	-0.358
229.2	-0.841	-0.358
229.401	-0.842	-0.357
229.6	-0.843	-0.362
229.8	-0.838	-0.359
230	-0.842	-0.357
230.2	-0.838	-0.359
230.4	-0.84	-0.357
230.601	-0.841	-0.362
230.8	-0.842	-0.359
231.001	-0.843	-0.355
231.2	-0.846	-0.358
231.4	-0.841	-0.358
231.6	-0.84	-0.36
231.801	-0.841	-0.357
232.001	-0.841	-0.356
232.201	-0.841	-0.355
232.4	-0.842	-0.36
232.601	-0.844	-0.358
232.801	-0.841	-0.357
233.001	-0.844	-0.359
233.2	-0.841	-0.36
233.4	-0.839	-0.355
233.6	-0.843	-0.359
233.801	-0.838	-0.357
234.001	-0.842	-0.361
234.2	-0.838	-0.353
234.4	-0.834	-0.358
234.601	-0.84	-0.36
234.801	-0.839	-0.358
235	-0.839	-0.36
235.2	-0.841	-0.357
235.401	-0.84	-0.359
235.601	-0.845	-0.361
235.8	-0.843	-0.358
236.001	-0.84	-0.361
236.201	-0.844	-0.359
236.401	-0.84	-0.356
236.601	-0.84	-0.358
236.8	-0.843	-0.359
237	-0.844	-0.361
237.2	-0.845	-0.358
237.401	-0.839	-0.362
237.6	-0.842	-0.36
237.801	-0.836	-0.354
238	-0.844	-0.357
238.2	-0.844	-0.361
238.401	-0.843	-0.359
238.601	-0.844	-0.357
238.8	-0.842	-0.359
239	-0.847	-0.361
239.2	-0.841	-0.359
239.401	-0.841	-0.353
239.601	-0.841	-0.354
239.8	-0.842	-0.356
240	-0.837	-0.356
240.201	-0.839	-0.36
240.401	-0.84	-0.36
240.6	-0.845	-0.359
240.8	-0.838	-0.36
241	-0.842	-0.362
241.2	-0.841	-0.36
241.401	-0.843	-0.357
241.601	-0.844	-0.363
241.8	-0.839	-0.36
242.001	-0.842	-0.357
242.201	-0.839	-0.355
242.402	-0.842	-0.361
242.6	-0.841	-0.358
242.801	-0.845	-0.362
243.001	-0.841	-0.361
243.201	-0.841	-0.364
243.4	-0.837	-0.359
243.601	-0.842	-0.361
243.801	-0.843	-0.359
244.001	-0.84	-0.362
244.2	-0.838	-0.358
244.4	-0.84	-0.358
244.6	-0.84	-0.36
244.8	-0.844	-0.36
245	-0.838	-0.361
245.2	-0.839	-0.359
245.4	-0.842	-0.362
245.6	-0.845	-0.362
245.8	-0.841	-0.356
246.001	-0.838	-0.361
246.201	-0.841	-0.355
246.401	-0.843	-0.357
246.6	-0.841	-0.355
246.8	-0.843	-0.354
247	-0.842	-0.36
247.201	-0.841	-0.359
247.401	-0.841	-0.359
247.6	-0.845	-0.359
247.801	-0.843	-0.36
248.001	-0.837	-0.36
248.2	-0.839	-0.359
248.4	-0.841	-0.356
248.6	-0.837	-0.355
248.8	-0.839	-0.356
249	-0.842	-0.358
249.2	-0.842	-0.356
249.401	-0.84	-0.355
249.601	-0.843	-0.361
249.801	-0.843	-0.356
250	-0.846	-0.355
250.201	-0.841	-0.358
250.4	-0.842	-0.355
250.601	-0.841	-0.361
250.801	-0.842	-0.358
251	-0.843	-0.357
251.2	-0.843	-0.362
251.401	-0.844	-0.355
251.601	-0.841	-0.362
251.8	-0.839	-0.355
252	-0.841	-0.356
252.2	-0.84	-0.354
252.401	-0.84	-0.357
252.601	-0.841	-0.36
252.8	-0.84	-0.359
253	-0.845	-0.361
253.2	-0.843	-0.362
253.401	-0.844	-0.36
253.601	-0.844	-0.359
253.8	-0.845	-0.357
254	-0.841	-0.36
254.201	-0.842	-0.361
254.401	-0.842	-0.364
254.601	-0.844	-0.363
254.8	-0.845	-0.357
255	-0.839	-0.361
255.2	-0.841	-0.357
255.4	-0.845	-0.361
255.6	-0.839	-0.361
255.8	-0.842	-0.362
256.001	-0.843	-0.357
256.2	-0.843	-0.36
256.4	-0.845	-0.358
256.6	-0.839	-0.362
256.8	-0.84	-0.354
257	-0.843	-0.358
257.201	-0.842	-0.358
257.401	-0.846	-0.359
257.6	-0.843	-0.36
257.8	-0.842	-0.363
258	-0.841	-0.357
258.201	-0.844	-0.361
258.4	-0.839	-0.359
258.6	-0.843	-0.361
258.8	-0.839	-0.358
259.001	-0.842	-0.36
259.2	-0.838	-0.359
259.4	-0.843	-0.36
259.601	-0.843	-0.356
259.801	-0.842	-0.36
260.001	-0.844	-0.358
260.2	-0.841	-0.361
260.4	-0.839	-0.363
260.6	-0.839	-0.357
260.801	-0.838	-0.356
261.001	-0.844	-0.36
261.2	-0.843	-0.361
261.401	-0.843	-0.353
261.601	-0.848	-0.357
261.8	-0.842	-0.36
262	-0.841	-0.354
262.201	-0.843	-0.359
262.4	-0.841	-0.362
262.601	-0.844	-0.364
262.801	-0.841	-0.362
263	-0.843	-0.36
263.201	-0.843	-0.355
263.4	-0.846	-0.359
263.601	-0.844	-0.361
263.8	-0.842	-0.357
264	-0.842	-0.361
264.2	-0.844	-0.359
264.4	-0.843	-0.355
264.601	-0.843	-0.364
264.801	-0.84	-0.36
265	-0.842	-0.358
265.201	-0.841	-0.358
265.401	-0.844	-0.363
265.6	-0.838	-0.36
265.801	-0.845	-0.359
266	-0.841	-0.359
266.201	-0.842	-0.359
266.401	-0.844	-0.36
266.601	-0.843	-0.359
266.801	-0.842	-0.363
267.001	-0.843	-0.358
267.2	-0.846	-0.36
267.401	-0.841	-0.364
267.601	-0.841	-0.359
267.8	-0.846	-0.361
268	-0.842	-0.358
268.2	-0.842	-0.36
268.401	-0.842	-0.36
268.6	-0.845	-0.36
268.8	-0.844	-0.359
269.001	-0.843	-0.359
269.201	-0.841	-0.355
269.401	-0.844	-0.36
269.6	-0.845	-0.361
269.801	-0.843	-0.358
270.001	-0.843	-0.36
270.201	-0.84	-0.358
270.4	-0.842	-0.358
270.601	-0.842	-0.357
270.8	-0.847	-0.36
271	-0.842	-0.361
271.2	-0.845	-0.36
271.4	-0.84	-0.357
271.601	-0.842	-0.36
271.801	-0.844	-0.362
272.001	-0.839	-0.36
272.2	-0.841	-0.359
272.4	-0.842	-0.362
272.6	-0.846	-0.359
272.801	-0.841	-0.359
273.001	-0.844	-0.356
273.201	-0.845	-0.36
273.401	-0.845	-0.365
273.6	-0.845	-0.36
273.801	-0.844	-0.362
274	-0.842	-0.36
274.2	-0.843	-0.359
274.4	-0.843	-0.359
274.6	-0.846	-0.361
274.801	-0.84	-0.362
275.001	-0.843	-0.361
275.2	-0.841	-0.357
275.401	-0.844	-0.363
275.601	-0.843	-0.361
275.801	-0.844	-0.359
276	-0.841	-0.361
276.2	-0.842	-0.358
276.4	-0.844	-0.358
276.6	-0.844	-0.357
276.801	-0.841	-0.354
277.001	-0.841	-0.357
277.2	-0.842	-0.361
277.4	-0.842	-0.36
277.6	-0.849	-0.359
277.801	-0.842	-0.356
278	-0.843	-0.358
278.2	-0.843	-0.358
278.401	-0.849	-0.362
278.601	-0.846	-0.361
278.8	-0.843	-0.361
279	-0.844	-0.356
279.201	-0.846	-0.363
279.4	-0.842	-0.359
279.6	-0.847	-0.362
279.8	-0.84	-0.357
280.001	-0.844	-0.359
280.2	-0.841	-0.363
280.401	-0.845	-0.358
280.6	-0.841	-0.361
280.8	-0.842	-0.361
281	-0.84	-0.36
281.2	-0.843	-0.362
281.4	-0.845	-0.36
281.601	-0.849	-0.362
281.8	-0.845	-0.363
282	-0.845	-0.361
282.201	-0.841	-0.357
282.4	-0.842	-0.359
282.601	-0.844	-0.356
282.8	-0.84	-0.359
283.001	-0.841	-0.358
283.201	-0.843	-0.367
283.401	-0.843	-0.358
283.6	-0.846	-0.362
283.801	-0.849	-0.362
284	-0.845	-0.359
284.2	-0.843	-0.36
284.4	-0.844	-0.359
284.601	-0.843	-0.363
284.8	-0.845	-0.356
285	-0.841	-0.359
285.201	-0.843	-0.361
285.4	-0.842	-0.358
285.6	-0.84	-0.36
285.801	-0.84	-0.358
286.001	-0.844	-0.362
286.201	-0.842	-0.362
286.401	-0.842	-0.361
286.601	-0.847	-0.355
286.801	-0.844	-0.359
287	-0.843	-0.357
287.2	-0.845	-0.357
287.401	-0.843	-0.362
287.601	-0.841	-0.358
287.801	-0.847	-0.359
288	-0.841	-0.358
288.2	-0.844	-0.358
288.401	-0.846	-0.362
288.601	-0.843	-0.358
288.8	-0.841	-0.361
289	-0.84	-0.359
289.2	-0.843	-0.359
289.401	-0.84	-0.359
289.6	-0.843	-0.359
289.8	-0.841	-0.357
290.001	-0.845	-0.361
290.2	-0.842	-0.359
290.401	-0.844	-0.356
290.6	-0.842	-0.362
290.8	-0.843	-0.362
291	-0.843	-0.363
291.2	-0.843	-0.362
291.4	-0.845	-0.359
291.6	-0.842	-0.365
291.8	-0.843	-0.359
292	-0.844	-0.359
292.2	-0.843	-0.36
292.401	-0.844	-0.36
292.601	-0.844	-0.357
292.801	-0.843	-0.361
293	-0.841	-0.36
293.2	-0.844	-0.359
293.401	-0.841	-0.361
293.601	-0.841	-0.362
293.801	-0.846	-0.357
294.001	-0.839	-0.357
294.2	-0.841	-0.364
294.401	-0.845	-0.357
294.601	-0.844	-0.355
294.8	-0.842	-0.363
295.001	-0.844	-0.36
295.201	-0.843	-0.359
295.4	-0.842	-0.359
295.6	-0.845	-0.359
295.8	-0.843	-0.36
296	-0.844	-0.354
296.2	-0.845	-0.359
296.401	-0.841	-0.361
296.601	-0.844	-0.359
296.801	-0.841	-0.362
297	-0.842	-0.357
297.2	-0.844	-0.361
297.4	-0.846	-0.36
297.601	-0.844	-0.363
297.8	-0.842	-0.36
298.001	-0.845	-0.362
298.201	-0.847	-0.359
298.4	-0.844	-0.356
298.6	-0.843	-0.358
298.801	-0.847	-0.36
299.001	-0.844	-0.361
299.2	-0.847	-0.36
299.401	-0.842	-0.36
299.6	-0.844	-0.357
299.8	-0.844	-0.36
300	-0.854	-0.362
300.2	-0.855	-0.364
300.4	-0.856	-0.366
300.601	-0.852	-0.37
300.8	-0.853	-0.368
301.001	-0.847	-0.366
301.2	-0.855	-0.367
301.401	-0.851	-0.365
301.601	-0.854	-0.37
301.8	-0.854	-0.366
302	-0.851	-0.366
302.2	-0.85	-0.368
302.4	-0.85	-0.371
302.601	-0.851	-0.367
302.8	-0.851	-0.367
303	-0.856	-0.368
303.201	-0.85	-0.365
303.4	-0.848	-0.369
303.6	-0.848	-0.367
303.8	-0.846	-0.367
304.001	-0.848	-0.367
304.201	-0.847	-0.365
304.4	-0.843	-0.362
304.6	-0.846	-0.366
304.801	-0.847	-0.371
305	-0.843	-0.365
305.201	-0.844	-0.366
305.401	-0.844	-0.363
305.601	-0.842	-0.366
305.801	-0.84	-0.364
306.001	-0.841	-0.366
306.201	-0.84	-0.362
306.401	-0.846	-0.364
306.6	-0.839	-0.362
306.8	-0.842	-0.364
307.001	-0.836	-0.362
307.201	-0.837	-0.359
307.4	-0.84	-0.363
307.6	-0.836	-0.359
307.8	-0.835	-0.364
308.001	-0.834	-0.364
308.2	-0.838	-0.359
308.4	-0.835	-0.362
308.601	-0.836	-0.357
308.8	-0.832	-0.357
309	-0.832	-0.358
309.201	-0.834	-0.354
309.401	-0.831	-0.357
309.601	-0.829	-0.359
309.8	-0.831	-0.356
310.001	-0.828	-0.355
310.2	-0.832	-0.354
310.4	-0.828	-0.352
310.601	-0.827	-0.352
310.8	-0.825	-0.357
311	-0.832	-0.355
311.201	-0.828	-0.357
311.401	-0.829	-0.353
311.6	-0.822	-0.357
311.8	-0.83	-0.351
312	-0.823	-0.351
312.2	-0.825	-0.349
312.4	-0.824	-0.35
312.601	-0.824	-0.351
312.801	-0.825	-0.349
313	-0.824	-0.344
313.2	-0.825	-0.354
313.401	-0.82	-0.351
313.6	-0.82	-0.345
313.8	-0.822	-0.347
314	-0.822	-0.349
314.201	-0.817	-0.347
314.4	-0.821	-0.35
314.6	-0.817	-0.344
314.8	-0.818	-0.344
315.001	-0.814	-0.341
315.201	-0.816	-0.346
315.4	-0.816	-0.341
315.601	-0.818	-0.346
315.8	-0.818	-0.346
316.001	-0.811	-0.342
316.201	-0.814	-0.336
316.401	-0.815	-0.342
316.601	-0.811	-0.341
316.801	-0.807	-0.341
317	-0.812	-0.339
317.2	-0.812	-0.343
317.401	-0.808	-0.337
317.6	-0.806	-0.341
317.8	-0.808	-0.338
318	-0.811	-0.33
318.2	-0.808	-0.332
318.401	-0.806	-0.336
318.6	-0.807	-0.335
318.801	-0.802	-0.331
319.001	-0.804	-0.33
319.201	-0.803	-0.33
319.4	-0.801	-0.332
319.601	-0.802	-0.33
319.801	-0.803	-0.33
320	-0.801	-0.326
320.2	-0.799	-0.331
320.401	-0.797	-0.332
320.601	-0.799	-0.327
320.8	-0.801	-0.325
321.001	-0.801	-0.332
321.2	-0.802	-0.327
321.401	-0.797	-0.322
321.601	-0.798	-0.324
321.801	-0.801	-0.324
322.001	-0.8	-0.326
322.2	-0.793	-0.326
322.4	-0.796	-0.325
322.601	-0.795	-0.32
322.8	-0.799	-0.323
323	-0.795	-0.324
323.201	-0.792	-0.32
323.4	-0.791	-0.321
323.6	-0.787	-0.319
323.801	-0.791	-0.321
324	-0.793	-0.32
324.201	-0.79	-0.32
324.401	-0.788	-0.322
324.601	-0.79	-0.313
324.8	-0.789	-0.318
325	-0.783	-0.318
325.2	-0.785	-0.315
325.4	-0.784	-0.321
325.601	-0.788	-0.316
325.8	-0.784	-0.312
326	-0.779	-0.316
326.201	-0.781	-0.311
326.4	-0.786	-0.313
326.6	-0.78	-0.313
326.8	-0.783	-0.311
327.001	-0.781	-0.309
327.2	-0.78	-0.311
327.401	-0.777	-0.31
327.6	-0.778	-0.309
327.8	-0.777	-0.309
328.001	-0.777	-0.307
328.201	-0.778	-0.304
328.4	-0.775	-0.305
328.6	-0.778	-0.308
328.801	-0.775	-0.309
329.001	-0.778	-0.307
329.201	-0.776	-0.31
329.4	-0.773	-0.308
329.6	-0.775	-0.301
329.8	-0.776	-0.307
330.001	-0.771	-0.304
330.2	-0.772	-0.305
330.401	-0.771	-0.302
330.6	-0.772	-0.302
330.801	-0.772	-0.3
331	-0.772	-0.303
331.201	-0.768	-0.3
331.401	-0.771	-0.297
331.6	-0.77	-0.296
331.8	-0.766	-0.3
332	-0.766	-0.302
332.201	-0.767	-0.295
332.401	-0.765	-0.297
332.6	-0.767	-0.298
332.801	-0.762	-0.294
333.001	-0.765	-0.295
333.2	-0.763	-0.295
333.4	-0.764	-0.295
333.6	-0.766	-0.296
333.801	-0.761	-0.296
334	-0.762	-0.291
334.201	-0.758	-0.293
334.4	-0.761	-0.294
334.6	-0.757	-0.288
334.801	-0.756	-0.291
335.001	-0.756	-0.291
335.201	-0.757	-0.286
335.401	-0.752	-0.287
335.601	-0.756	-0.287
335.8	-0.757	-0.292
336	-0.752	-0.284
336.201	-0.756	-0.288
336.401	-0.757	-0.289
336.601	-0.756	-0.283
336.8	-0.752	-0.281
337.001	-0.756	-0.284
337.2	-0.753	-0.283
337.4	-0.754	-0.282
337.6	-0.75	-0.282
337.8	-0.75	-0.281
338.001	-0.751	-0.282
338.201	-0.75	-0.28
338.4	-0.751	-0.279
338.6	-0.749	-0.28
338.8	-0.747	-0.28
339	-0.749	-0.282
339.2	-0.747	-0.276
339.401	-0.751	-0.276
339.601	-0.747	-0.276
339.801	-0.747	-0.277
340	-0.75	-0.275
340.201	-0.747	-0.274
340.4	-0.743	-0.275
340.601	-0.745	-0.278
340.8	-0.742	-0.276
341.001	-0.741	-0.272
341.201	-0.743	-0.273
341.401	-0.742	-0.269
341.6	-0.744	-0.273
341.8	-0.741	-0.27
342	-0.737	-0.268
342.201	-0.738	-0.268
342.401	-0.737	-0.27
342.6	-0.738	-0.269
342.8	-0.739	-0.267
343	-0.735	-0.265
343.2	-0.738	-0.27
343.4	-0.734	-0.262
343.601	-0.738	-0.268
343.8	-0.738	-0.271
344	-0.737	-0.262
344.201	-0.736	-0.259
344.4	-0.735	-0.263
344.6	-0.733	-0.263
344.801	-0.732	-0.261
345	-0.734	-0.26
345.2	-0.732	-0.263
345.4	-0.73	-0.259
345.601	-0.729	-0.261
345.8	-0.734	-0.26
346	-0.733	-0.259
346.2	-0.73	-0.259
346.4	-0.728	-0.26
346.601	-0.727	-0.257
346.801	-0.727	-0.258
347.001	-0.725	-0.258
347.2	-0.726	-0.256
347.401	-0.726	-0.257
347.6	-0.726	-0.258
347.801	-0.725	-0.257
348.001	-0.721	-0.252
348.2	-0.72	-0.256
348.401	-0.726	-0.254
348.601	-0.726	-0.251
348.8	-0.72	-0.252
349.001	-0.723	-0.25
349.2	-0.722	-0.249
349.401	-0.718	-0.251
349.601	-0.718	-0.253
349.8	-0.719	-0.249
350.001	-0.719	-0.248
350.2	-0.716	-0.248
350.4	-0.718	-0.244
350.6	-0.716	-0.243
350.8	-0.713	-0.248
351.001	-0.713	-0.248
351.2	-0.713	-0.243
351.4	-0.713	-0.243
351.601	-0.715	-0.242
351.8	-0.716	-0.24
352.001	-0.716	-0.245
352.201	-0.711	-0.239
352.401	-0.709	-0.241
352.601	-0.711	-0.243
352.801	-0.713	-0.242
353.001	-0.712	-0.243
353.2	-0.71	-0.241
353.401	-0.712	-0.241
353.6	-0.711	-0.236
353.8	-0.709	-0.238
354.001	-0.712	-0.238
354.201	-0.705	-0.236
354.4	-0.707	-0.235
354.6	-0.707	-0.237
354.801	-0.706	-0.238
355.001	-0.705	-0.239
355.201	-0.704	-0.239
355.401	-0.706	-0.233
355.601	-0.708	-0.233
355.801	-0.705	-0.239
356.001	-0.702	-0.234
356.2	-0.702	-0.231
356.401	-0.706	-0.231
356.6	-0.702	-0.231
356.8	-0.701	-0.229
357	-0.699	-0.231
357.201	-0.697	-0.232
357.4	-0.699	-0.227
357.601	-0.697	-0.228
357.801	-0.7	-0.225
358.001	-0.698	-0.228
358.2	-0.697	-0.222
358.4	-0.697	-0.223
358.601	-0.697	-0.225
358.8	-0.699	-0.226
359	-0.696	-0.223
359.2	-0.693	-0.229
359.4	-0.693	-0.225
359.6	-0.697	-0.225
359.801	-0.696	-0.221
360	-0.692	-0.223
360.2	-0.689	-0.223
360.401	-0.69	-0.22
360.601	-0.69	-0.22
360.801	-0.688	-0.224
361	-0.689	-0.223
361.2	-0.689	-0.224
361.401	-0.688	-0.222
361.601	-0.689	-0.218
361.801	-0.686	-0.219
362.001	-0.687	-0.217
362.2	-0.688	-0.217
362.4	-0.684	-0.216
362.601	-0.686	-0.217
362.801	-0.684	-0.218
363.001	-0.687	-0.22
363.201	-0.684	-0.219
363.4	-0.686	-0.213
363.601	-0.687	-0.215
363.8	-0.683	-0.212
364	-0.682	-0.214
364.2	-0.686	-0.209
364.401	-0.683	-0.211
364.601	-0.684	-0.213
364.801	-0.684	-0.209
365	-0.679	-0.209
365.201	-0.681	-0.212
365.4	-0.68	-0.214
365.601	-0.679	-0.21
365.8	-0.681	-0.207
366	-0.677	-0.206
366.201	-0.676	-0.21
366.4	-0.679	-0.207
366.601	-0.679	-0.209
366.8	-0.676	-0.207
367.001	-0.671	-0.205
367.2	-0.676	-0.206
367.401	-0.673	-0.208
367.601	-0.675	-0.206
367.8	-0.67	-0.206
368	-0.676	-0.203
368.2	-0.671	-0.207
368.4	-0.672	-0.206
368.6	-0.672	-0.203
368.8	-0.672	-0.2
369	-0.672	-0.201
369.201	-0.671	-0.203
369.4	-0.67	-0.197
369.6	-0.668	-0.195
369.801	-0.668	-0.197
370.001	-0.671	-0.195
370.2	-0.664	-0.195
370.4	-0.667	-0.195
370.6	-0.664	-0.195
370.8	-0.664	-0.195
371	-0.666	-0.195
371.201	-0.664	-0.194
371.401	-0.664	-0.191
371.6	-0.659	-0.197
371.801	-0.663	-0.192
372.001	-0.665	-0.192
372.2	-0.661	-0.19
372.4	-0.665	-0.192
372.6	-0.658	-0.188
372.801	-0.664	-0.188
373.001	-0.665	-0.193
373.201	-0.66	-0.188
373.401	-0.659	-0.193
373.6	-0.66	-0.192
373.801	-0.656	-0.19
374.001	-0.661	-0.186
374.2	-0.657	-0.187
374.4	-0.663	-0.188
374.6	-0.655	-0.187
374.801	-0.655	-0.186
375.001	-0.658	-0.185
375.2	-0.658	-0.188
375.401	-0.656	-0.184
375.6	-0.653	-0.184
375.8	-0.655	-0.182
376.001	-0.652	-0.184
376.2	-0.653	-0.184
376.4	-0.656	-0.184
376.6	-0.652	-0.18
376.801	-0.653	-0.183
377	-0.652	-0.18
377.201	-0.65	-0.184
377.4	-0.65	-0.178
377.6	-0.646	-0.179
377.8	-0.649	-0.178
378	-0.646	-0.18
378.2	-0.649	-0.177
378.4	-0.648	-0.181
378.601	-0.647	-0.175
378.801	-0.646	-0.176
379.001	-0.643	-0.173
379.2	-0.644	-0.174
379.401	-0.644	-0.179
379.6	-0.645	-0.174
379.801	-0.645	-0.173
380	-0.646	-0.174
380.2	-0.649	-0.173
380.4	-0.643	-0.177
380.6	-0.646	-0.17
380.8	-0.641	-0.172
381	-0.642	-0.17
381.2	-0.641	-0.17
381.4	-0.637	-0.174
381.601	-0.644	-0.168
381.8	-0.642	-0.168
382.001	-0.637	-0.172
382.201	-0.636	-0.169
382.401	-0.637	-0.169
382.601	-0.636	-0.165
382.8	-0.636	-0.167
383.001	-0.636	-0.166
383.201	-0.631	-0.169
383.4	-0.635	-0.164
383.601	-0.636	-0.171
383.8	-0.631	-0.165
384	-0.634	-0.164
384.2	-0.633	-0.166
384.4	-0.634	-0.167
384.6	-0.636	-0.163
384.801	-0.635	-0.162
385.001	-0.632	-0.166
385.2	-0.628	-0.163
385.401	-0.63	-0.161
385.6	-0.631	-0.16
385.8	-0.629	-0.161
386	-0.628	-0.157
386.2	-0.628	-0.16
386.4	-0.629	-0.158
386.6	-0.623	-0.159
386.801	-0.628	-0.157
387.001	-0.63	-0.157
387.2	-0.628	-0.159
387.401	-0.628	-0.16
387.601	-0.624	-0.158
387.8	-0.626	-0.155
388	-0.624	-0.156
388.2	-0.627	-0.154
388.4	-0.625	-0.153
388.6	-0.623	-0.152
388.801	-0.624	-0.154
389	-0.625	-0.153
389.201	-0.623	-0.151
389.401	-0.621	-0.151
389.6	-0.62	-0.153
389.8	-0.621	-0.153
390.001	-0.622	-0.149
390.2	-0.621	-0.152
390.4	-0.619	-0.149
390.601	-0.619	-0.149
390.8	-0.617	-0.147
391	-0.615	-0.147
391.201	-0.617	-0.151
391.4	-0.611	-0.152
391.6	-0.615	-0.147
391.801	-0.619	-0.144
392	-0.616	-0.147
392.201	-0.617	-0.148
392.401	-0.616	-0.142
392.601	-0.611	-0.146
392.8	-0.613	-0.143
393	-0.612	-0.143
393.2	-0.615	-0.143
393.4	-0.611	-0.147
393.602	-0.613	-0.14
393.8	-0.613	-0.139
394	-0.609	-0.141
394.2	-0.608	-0.141
394.4	-0.61	-0.138
394.601	-0.608	-0.14
394.8	-0.605	-0.139
395	-0.608	-0.139
395.201	-0.607	-0.14
395.401	-0.606	-0.139
395.601	-0.606	-0.135
395.8	-0.601	-0.138
396.001	-0.609	-0.14
396.201	-0.607	-0.137
396.4	-0.605	-0.137
396.6	-0.605	-0.135
396.801	-0.607	-0.137
397.001	-0.602	-0.137
397.2	-0.602	-0.133
397.401	-0.603	-0.133
397.6	-0.604	-0.134
397.8	-0.6	-0.133
398	-0.602	-0.134
398.2	-0.603	-0.135
398.4	-0.603	-0.133
398.6	-0.599	-0.129
398.8	-0.601	-0.131
399	-0.601	-0.134
399.201	-0.595	-0.128
399.401	-0.599	-0.131
[truncated: 7,741 more rows]

## Sheet: Fig1e
BLI sensorgrams for Fig.1e NB9 binds to FZD3
time (s)	response(nm) 128 nM	fit	response(nm) 64 nM	fit	response(nm) 32 nM	fit	response(nm) 8 nM	fit
0.2	0	0	0.001	0	0	0	0	0
0.4	0.001	0.001	0.002	0	0	0	0	0
0.6	0.001	0.001	0.002	0.001	0	0	0	0
0.8	0.002	0.001	0.003	0.001	0.001	0.001	0.001	0
1	0.003	0.001	0.004	0.001	0.001	0.001	0.001	0
1.2	0.004	0.002	0.005	0.001	0.002	0.001	0.001	0.001
1.4	0.004	0.002	0.006	0.001	0.002	0.001	0.002	0.001
1.6	0.005	0.002	0.006	0.002	0.002	0.001	0.002	0.001
1.8	0.006	0.003	0.007	0.002	0.003	0.001	0.002	0.001
2	0.007	0.003	0.008	0.002	0.003	0.001	0.003	0.001
2.2	0.008	0.003	0.008	0.002	0.003	0.001	0.003	0.001
2.4	0.009	0.003	0.009	0.003	0.004	0.002	0.003	0.001
2.6	0.01	0.004	0.01	0.003	0.004	0.002	0.003	0.001
2.8	0.01	0.004	0.011	0.003	0.005	0.002	0.003	0.001
3	0.011	0.004	0.011	0.003	0.005	0.002	0.003	0.001
3.2	0.013	0.005	0.012	0.003	0.006	0.002	0.004	0.001
3.4	0.014	0.005	0.013	0.004	0.006	0.002	0.004	0.001
3.6	0.015	0.005	0.013	0.004	0.007	0.002	0.004	0.002
3.8	0.016	0.005	0.014	0.004	0.007	0.002	0.004	0.002
4	0.016	0.006	0.015	0.004	0.007	0.003	0.005	0.002
4.2	0.017	0.006	0.015	0.004	0.006	0.003	0.004	0.002
4.4	0.018	0.006	0.015	0.005	0.007	0.003	0.004	0.002
4.6	0.018	0.007	0.015	0.005	0.007	0.003	0.005	0.002
4.8	0.02	0.007	0.015	0.005	0.007	0.003	0.006	0.002
5	0.02	0.007	0.015	0.005	0.008	0.003	0.006	0.002
5.2	0.02	0.007	0.015	0.005	0.008	0.003	0.006	0.002
5.4	0.02	0.008	0.016	0.006	0.008	0.004	0.006	0.002
5.6	0.021	0.008	0.016	0.006	0.008	0.004	0.006	0.002
5.8	0.021	0.008	0.016	0.006	0.009	0.004	0.006	0.002
6	0.021	0.008	0.017	0.006	0.009	0.004	0.007	0.003
6.2	0.022	0.009	0.017	0.006	0.009	0.004	0.007	0.003
6.4	0.022	0.009	0.018	0.007	0.009	0.004	0.007	0.003
6.6	0.022	0.009	0.018	0.007	0.009	0.004	0.007	0.003
6.8	0.023	0.01	0.019	0.007	0.01	0.004	0.007	0.003
7	0.024	0.01	0.019	0.007	0.01	0.005	0.007	0.003
7.2	0.025	0.01	0.019	0.007	0.01	0.005	0.007	0.003
7.4	0.026	0.01	0.02	0.008	0.01	0.005	0.007	0.003
7.6	0.026	0.011	0.02	0.008	0.011	0.005	0.007	0.003
7.8	0.026	0.011	0.02	0.008	0.011	0.005	0.007	0.003
8	0.027	0.011	0.021	0.008	0.011	0.005	0.007	0.003
8.2	0.027	0.011	0.021	0.008	0.011	0.005	0.008	0.003
8.4	0.028	0.012	0.021	0.009	0.012	0.005	0.008	0.004
8.6	0.028	0.012	0.021	0.009	0.012	0.006	0.009	0.004
8.8	0.028	0.012	0.022	0.009	0.013	0.006	0.009	0.004
9	0.028	0.013	0.022	0.009	0.013	0.006	0.009	0.004
9.2	0.028	0.013	0.022	0.009	0.013	0.006	0.009	0.004
9.4	0.029	0.013	0.023	0.01	0.014	0.006	0.009	0.004
9.6	0.03	0.013	0.023	0.01	0.014	0.006	0.01	0.004
9.8	0.03	0.014	0.024	0.01	0.014	0.006	0.01	0.004
10	0.031	0.014	0.025	0.01	0.014	0.006	0.01	0.004
10.2	0.031	0.014	0.025	0.01	0.014	0.007	0.01	0.004
10.4	0.032	0.014	0.025	0.011	0.014	0.007	0.01	0.004
10.6	0.033	0.015	0.026	0.011	0.014	0.007	0.01	0.004
10.8	0.034	0.015	0.026	0.011	0.014	0.007	0.011	0.005
11	0.034	0.015	0.027	0.011	0.015	0.007	0.012	0.005
11.2	0.035	0.016	0.027	0.011	0.015	0.007	0.012	0.005
11.4	0.035	0.016	0.028	0.012	0.015	0.007	0.012	0.005
11.6	0.035	0.016	0.028	0.012	0.015	0.007	0.011	0.005
11.8	0.036	0.016	0.028	0.012	0.015	0.008	0.012	0.005
12	0.036	0.017	0.028	0.012	0.014	0.008	0.011	0.005
12.2	0.036	0.017	0.028	0.012	0.015	0.008	0.012	0.005
12.4	0.036	0.017	0.028	0.013	0.015	0.008	0.012	0.005
12.6	0.036	0.017	0.028	0.013	0.015	0.008	0.012	0.005
12.8	0.036	0.018	0.028	0.013	0.015	0.008	0.012	0.005
13	0.036	0.018	0.028	0.013	0.015	0.008	0.012	0.005
13.2	0.037	0.018	0.028	0.013	0.015	0.008	0.012	0.006
13.4	0.038	0.018	0.028	0.014	0.015	0.009	0.012	0.006
13.6	0.038	0.019	0.027	0.014	0.016	0.009	0.012	0.006
13.8	0.038	0.019	0.027	0.014	0.015	0.009	0.011	0.006
14	0.038	0.019	0.027	0.014	0.015	0.009	0.011	0.006
14.2	0.039	0.02	0.028	0.014	0.015	0.009	0.011	0.006
14.4	0.039	0.02	0.028	0.015	0.015	0.009	0.011	0.006
14.6	0.04	0.02	0.028	0.015	0.015	0.009	0.012	0.006
14.8	0.04	0.02	0.028	0.015	0.015	0.009	0.012	0.006
15	0.04	0.021	0.029	0.015	0.016	0.01	0.012	0.006
15.2	0.041	0.021	0.029	0.015	0.016	0.01	0.012	0.006
15.4	0.041	0.021	0.029	0.015	0.016	0.01	0.012	0.006
15.6	0.041	0.021	0.03	0.016	0.016	0.01	0.013	0.007
15.8	0.042	0.022	0.031	0.016	0.017	0.01	0.013	0.007
16	0.043	0.022	0.031	0.016	0.017	0.01	0.013	0.007
16.2	0.043	0.022	0.032	0.016	0.017	0.01	0.014	0.007
16.4	0.044	0.022	0.033	0.016	0.018	0.01	0.014	0.007
16.6	0.045	0.023	0.033	0.017	0.018	0.011	0.014	0.007
16.8	0.045	0.023	0.033	0.017	0.018	0.011	0.014	0.007
17	0.045	0.023	0.033	0.017	0.018	0.011	0.014	0.007
17.2	0.046	0.023	0.033	0.017	0.019	0.011	0.014	0.007
17.4	0.046	0.024	0.033	0.017	0.019	0.011	0.014	0.007
17.6	0.046	0.024	0.033	0.018	0.019	0.011	0.014	0.007
17.8	0.046	0.024	0.033	0.018	0.018	0.011	0.013	0.007
18	0.046	0.024	0.033	0.018	0.019	0.011	0.013	0.007
18.2	0.047	0.025	0.034	0.018	0.019	0.012	0.013	0.008
18.4	0.047	0.025	0.034	0.018	0.019	0.012	0.013	0.008
18.6	0.047	0.025	0.034	0.019	0.019	0.012	0.013	0.008
18.8	0.047	0.025	0.034	0.019	0.019	0.012	0.013	0.008
19	0.047	0.026	0.034	0.019	0.019	0.012	0.014	0.008
19.2	0.047	0.026	0.034	0.019	0.019	0.012	0.014	0.008
19.4	0.048	0.026	0.035	0.019	0.02	0.012	0.015	0.008
19.6	0.048	0.026	0.036	0.019	0.021	0.012	0.015	0.008
19.8	0.049	0.027	0.036	0.02	0.021	0.012	0.015	0.008
20	0.049	0.027	0.036	0.02	0.021	0.013	0.015	0.008
20.2	0.049	0.027	0.037	0.02	0.022	0.013	0.015	0.008
20.4	0.05	0.028	0.037	0.02	0.022	0.013	0.015	0.008
20.6	0.05	0.028	0.037	0.02	0.022	0.013	0.015	0.008
20.8	0.05	0.028	0.037	0.021	0.022	0.013	0.015	0.009
21	0.05	0.028	0.038	0.021	0.023	0.013	0.015	0.009
21.2	0.05	0.029	0.038	0.021	0.023	0.013	0.015	0.009
21.4	0.05	0.029	0.038	0.021	0.023	0.013	0.016	0.009
21.6	0.051	0.029	0.038	0.021	0.023	0.014	0.016	0.009
21.8	0.051	0.029	0.038	0.022	0.023	0.014	0.016	0.009
22	0.052	0.03	0.039	0.022	0.024	0.014	0.017	0.009
22.2	0.053	0.03	0.039	0.022	0.024	0.014	0.017	0.009
22.4	0.053	0.03	0.039	0.022	0.024	0.014	0.018	0.009
22.6	0.054	0.03	0.04	0.022	0.024	0.014	0.018	0.009
22.8	0.055	0.031	0.04	0.022	0.025	0.014	0.018	0.009
23	0.055	0.031	0.04	0.023	0.024	0.014	0.018	0.009
23.2	0.056	0.031	0.04	0.023	0.024	0.015	0.019	0.01
23.4	0.056	0.031	0.04	0.023	0.024	0.015	0.018	0.01
23.6	0.056	0.031	0.041	0.023	0.024	0.015	0.018	0.01
23.8	0.056	0.032	0.04	0.023	0.023	0.015	0.018	0.01
24	0.056	0.032	0.04	0.024	0.023	0.015	0.017	0.01
24.2	0.056	0.032	0.041	0.024	0.023	0.015	0.016	0.01
24.4	0.056	0.032	0.041	0.024	0.022	0.015	0.016	0.01
24.6	0.055	0.033	0.041	0.024	0.022	0.015	0.015	0.01
24.8	0.055	0.033	0.041	0.024	0.022	0.015	0.015	0.01
25	0.055	0.033	0.041	0.024	0.022	0.016	0.015	0.01
25.2	0.055	0.033	0.041	0.025	0.022	0.016	0.014	0.01
25.4	0.055	0.034	0.041	0.025	0.023	0.016	0.015	0.01
25.6	0.056	0.034	0.042	0.025	0.024	0.016	0.016	0.01
25.8	0.056	0.034	0.042	0.025	0.024	0.016	0.016	0.011
26	0.057	0.034	0.043	0.025	0.024	0.016	0.017	0.011
26.2	0.057	0.035	0.043	0.026	0.024	0.016	0.017	0.011
26.4	0.058	0.035	0.044	0.026	0.025	0.016	0.018	0.011
26.6	0.058	0.035	0.044	0.026	0.026	0.016	0.018	0.011
26.8	0.059	0.035	0.044	0.026	0.026	0.017	0.018	0.011
27	0.059	0.036	0.044	0.026	0.026	0.017	0.018	0.011
27.2	0.059	0.036	0.044	0.026	0.026	0.017	0.018	0.011
27.4	0.059	0.036	0.044	0.027	0.026	0.017	0.018	0.011
27.6	0.059	0.036	0.044	0.027	0.026	0.017	0.018	0.011
27.8	0.058	0.037	0.044	0.027	0.025	0.017	0.018	0.011
28	0.058	0.037	0.044	0.027	0.025	0.017	0.018	0.011
28.2	0.059	0.037	0.044	0.027	0.025	0.017	0.018	0.011
28.4	0.059	0.037	0.044	0.028	0.025	0.018	0.018	0.012
28.6	0.059	0.038	0.044	0.028	0.026	0.018	0.018	0.012
28.8	0.059	0.038	0.044	0.028	0.026	0.018	0.018	0.012
29	0.06	0.038	0.044	0.028	0.026	0.018	0.019	0.012
29.2	0.06	0.038	0.044	0.028	0.027	0.018	0.02	0.012
29.4	0.061	0.039	0.045	0.028	0.028	0.018	0.02	0.012
29.6	0.062	0.039	0.045	0.029	0.028	0.018	0.021	0.012
29.8	0.062	0.039	0.046	0.029	0.028	0.018	0.022	0.012
30	0.062	0.039	0.046	0.029	0.028	0.018	0.021	0.012
30.2	0.062	0.039	0.046	0.029	0.028	0.019	0.021	0.012
30.4	0.063	0.04	0.046	0.029	0.028	0.019	0.021	0.012
30.6	0.063	0.04	0.046	0.029	0.027	0.019	0.02	0.012
30.8	0.063	0.04	0.046	0.03	0.027	0.019	0.02	0.012
31	0.062	0.04	0.046	0.03	0.027	0.019	0.02	0.012
31.2	0.062	0.041	0.046	0.03	0.027	0.019	0.02	0.013
31.4	0.062	0.041	0.046	0.03	0.026	0.019	0.019	0.013
31.6	0.062	0.041	0.046	0.03	0.025	0.019	0.019	0.013
31.8	0.062	0.041	0.046	0.031	0.025	0.019	0.018	0.013
32	0.062	0.042	0.046	0.031	0.026	0.02	0.018	0.013
32.2	0.063	0.042	0.046	0.031	0.026	0.02	0.018	0.013
32.4	0.063	0.042	0.047	0.031	0.026	0.02	0.018	0.013
32.6	0.063	0.042	0.047	0.031	0.026	0.02	0.019	0.013
32.8	0.063	0.043	0.048	0.031	0.026	0.02	0.019	0.013
33	0.064	0.043	0.049	0.032	0.028	0.02	0.02	0.013
33.2	0.065	0.043	0.048	0.032	0.027	0.02	0.02	0.013
33.4	0.065	0.043	0.049	0.032	0.028	0.02	0.02	0.013
33.6	0.065	0.043	0.049	0.032	0.029	0.02	0.021	0.013
33.8	0.065	0.044	0.049	0.032	0.028	0.021	0.02	0.014
34	0.065	0.044	0.049	0.032	0.028	0.021	0.02	0.014
34.2	0.065	0.044	0.049	0.033	0.029	0.021	0.02	0.014
34.4	0.066	0.044	0.049	0.033	0.029	0.021	0.021	0.014
34.6	0.066	0.045	0.049	0.033	0.029	0.021	0.022	0.014
34.8	0.067	0.045	0.049	0.033	0.03	0.021	0.021	0.014
35	0.067	0.045	0.049	0.033	0.03	0.021	0.021	0.014
35.2	0.068	0.045	0.05	0.033	0.03	0.021	0.022	0.014
35.4	0.067	0.046	0.05	0.034	0.029	0.021	0.021	0.014
35.6	0.067	0.046	0.05	0.034	0.029	0.022	0.021	0.014
35.8	0.068	0.046	0.05	0.034	0.03	0.022	0.021	0.014
36	0.068	0.046	0.05	0.034	0.03	0.022	0.021	0.014
36.2	0.069	0.046	0.05	0.034	0.03	0.022	0.021	0.014
36.4	0.069	0.047	0.051	0.035	0.03	0.022	0.021	0.015
36.6	0.068	0.047	0.051	0.035	0.03	0.022	0.021	0.015
36.8	0.068	0.047	0.051	0.035	0.03	0.022	0.02	0.015
37	0.069	0.047	0.051	0.035	0.03	0.022	0.02	0.015
37.2	0.069	0.048	0.05	0.035	0.029	0.022	0.02	0.015
37.4	0.069	0.048	0.051	0.035	0.029	0.023	0.021	0.015
37.6	0.069	0.048	0.051	0.036	0.029	0.023	0.021	0.015
37.8	0.069	0.048	0.051	0.036	0.029	0.023	0.021	0.015
38	0.069	0.048	0.052	0.036	0.029	0.023	0.021	0.015
38.2	0.07	0.049	0.052	0.036	0.03	0.023	0.022	0.015
38.4	0.071	0.049	0.053	0.036	0.031	0.023	0.022	0.015
38.6	0.071	0.049	0.053	0.036	0.031	0.023	0.023	0.015
38.8	0.071	0.049	0.053	0.037	0.031	0.023	0.023	0.015
39	0.071	0.05	0.053	0.037	0.031	0.023	0.023	0.015
39.2	0.071	0.05	0.053	0.037	0.031	0.024	0.022	0.016
39.4	0.071	0.05	0.054	0.037	0.031	0.024	0.022	0.016
39.6	0.071	0.05	0.054	0.037	0.032	0.024	0.022	0.016
39.8	0.071	0.051	0.054	0.037	0.032	0.024	0.022	0.016
40	0.071	0.051	0.054	0.038	0.032	0.024	0.022	0.016
40.2	0.072	0.051	0.053	0.038	0.032	0.024	0.022	0.016
40.4	0.071	0.051	0.054	0.038	0.032	0.024	0.022	0.016
40.6	0.072	0.051	0.054	0.038	0.032	0.024	0.022	0.016
40.8	0.073	0.052	0.054	0.038	0.033	0.024	0.022	0.016
41	0.073	0.052	0.054	0.038	0.033	0.025	0.023	0.016
41.2	0.074	0.052	0.054	0.039	0.033	0.025	0.023	0.016
41.4	0.074	0.052	0.055	0.039	0.033	0.025	0.023	0.016
41.6	0.074	0.052	0.055	0.039	0.033	0.025	0.023	0.016
41.8	0.074	0.053	0.055	0.039	0.033	0.025	0.024	0.016
42	0.074	0.053	0.055	0.039	0.033	0.025	0.024	0.017
42.2	0.075	0.053	0.056	0.039	0.034	0.025	0.024	0.017
42.4	0.075	0.053	0.056	0.04	0.034	0.025	0.024	0.017
42.6	0.075	0.054	0.056	0.04	0.034	0.025	0.024	0.017
42.8	0.075	0.054	0.056	0.04	0.034	0.026	0.024	0.017
43	0.075	0.054	0.057	0.04	0.034	0.026	0.024	0.017
43.2	0.075	0.054	0.057	0.04	0.034	0.026	0.024	0.017
43.4	0.076	0.054	0.058	0.04	0.034	0.026	0.024	0.017
43.6	0.076	0.055	0.058	0.041	0.034	0.026	0.024	0.017
43.8	0.076	0.055	0.058	0.041	0.034	0.026	0.023	0.017
44	0.077	0.055	0.058	0.041	0.034	0.026	0.023	0.017
44.2	0.077	0.055	0.058	0.041	0.034	0.026	0.023	0.017
44.4	0.077	0.056	0.058	0.041	0.034	0.026	0.023	0.017
44.6	0.078	0.056	0.058	0.041	0.035	0.026	0.024	0.017
44.8	0.078	0.056	0.058	0.042	0.035	0.027	0.024	0.018
45	0.078	0.056	0.058	0.042	0.035	0.027	0.024	0.018
45.2	0.078	0.056	0.058	0.042	0.035	0.027	0.024	0.018
45.4	0.078	0.057	0.058	0.042	0.035	0.027	0.025	0.018
45.6	0.078	0.057	0.058	0.042	0.034	0.027	0.024	0.018
45.8	0.077	0.057	0.057	0.042	0.034	0.027	0.024	0.018
46	0.077	0.057	0.057	0.042	0.034	0.027	0.023	0.018
46.2	0.077	0.057	0.057	0.043	0.034	0.027	0.023	0.018
46.4	0.077	0.058	0.058	0.043	0.034	0.027	0.024	0.018
46.6	0.078	0.058	0.058	0.043	0.034	0.028	0.024	0.018
46.8	0.078	0.058	0.059	0.043	0.034	0.028	0.024	0.018
47	0.078	0.058	0.059	0.043	0.034	0.028	0.024	0.018
47.2	0.079	0.059	0.06	0.043	0.034	0.028	0.024	0.018
47.4	0.079	0.059	0.06	0.044	0.034	0.028	0.024	0.018
47.6	0.079	0.059	0.06	0.044	0.034	0.028	0.024	0.019
47.8	0.079	0.059	0.06	0.044	0.034	0.028	0.023	0.019
48	0.08	0.059	0.06	0.044	0.035	0.028	0.024	0.019
48.2	0.08	0.06	0.06	0.044	0.035	0.028	0.024	0.019
48.4	0.08	0.06	0.059	0.044	0.035	0.028	0.024	0.019
48.6	0.08	0.06	0.06	0.045	0.036	0.029	0.025	0.019
48.8	0.081	0.06	0.06	0.045	0.036	0.029	0.025	0.019
49	0.08	0.06	0.059	0.045	0.036	0.029	0.025	0.019
49.2	0.081	0.061	0.059	0.045	0.036	0.029	0.025	0.019
49.4	0.081	0.061	0.059	0.045	0.036	0.029	0.024	0.019
49.6	0.081	0.061	0.059	0.045	0.036	0.029	0.024	0.019
49.8	0.081	0.061	0.059	0.046	0.037	0.029	0.024	0.019
50	0.081	0.061	0.06	0.046	0.036	0.029	0.024	0.019
50.2	0.082	0.062	0.06	0.046	0.037	0.029	0.025	0.019
50.4	0.082	0.062	0.061	0.046	0.037	0.029	0.025	0.019
50.6	0.082	0.062	0.061	0.046	0.037	0.03	0.025	0.02
50.8	0.083	0.062	0.061	0.046	0.037	0.03	0.025	0.02
51	0.082	0.063	0.061	0.046	0.037	0.03	0.025	0.02
51.2	0.082	0.063	0.061	0.047	0.037	0.03	0.025	0.02
51.4	0.082	0.063	0.061	0.047	0.036	0.03	0.024	0.02
51.6	0.081	0.063	0.061	0.047	0.036	0.03	0.024	0.02
51.8	0.081	0.063	0.061	0.047	0.036	0.03	0.025	0.02
52	0.082	0.064	0.061	0.047	0.037	0.03	0.025	0.02
52.2	0.082	0.064	0.061	0.047	0.037	0.03	0.025	0.02
52.4	0.082	0.064	0.061	0.048	0.037	0.031	0.026	0.02
52.6	0.083	0.064	0.061	0.048	0.037	0.031	0.026	0.02
52.8	0.083	0.064	0.061	0.048	0.037	0.031	0.026	0.02
53	0.083	0.065	0.061	0.048	0.037	0.031	0.026	0.02
53.2	0.083	0.065	0.062	0.048	0.037	0.031	0.027	0.02
53.4	0.084	0.065	0.062	0.048	0.038	0.031	0.027	0.021
53.6	0.084	0.065	0.062	0.048	0.038	0.031	0.027	0.021
53.8	0.084	0.065	0.062	0.049	0.038	0.031	0.027	0.021
54	0.084	0.066	0.063	0.049	0.038	0.031	0.027	0.021
54.2	0.085	0.066	0.063	0.049	0.039	0.031	0.028	0.021
54.4	0.085	0.066	0.063	0.049	0.039	0.032	0.028	0.021
54.6	0.086	0.066	0.063	0.049	0.039	0.032	0.028	0.021
54.8	0.086	0.066	0.064	0.049	0.039	0.032	0.028	0.021
55	0.085	0.067	0.064	0.05	0.039	0.032	0.028	0.021
55.2	0.085	0.067	0.064	0.05	0.038	0.032	0.028	0.021
55.4	0.086	0.067	0.064	0.05	0.039	0.032	0.028	0.021
55.6	0.086	0.067	0.064	0.05	0.039	0.032	0.028	0.021
55.8	0.086	0.067	0.065	0.05	0.039	0.032	0.028	0.021
56	0.086	0.068	0.065	0.05	0.04	0.032	0.028	0.021
56.2	0.086	0.068	0.065	0.05	0.04	0.032	0.028	0.021
56.4	0.086	0.068	0.065	0.051	0.04	0.033	0.028	0.022
56.6	0.086	0.068	0.065	0.051	0.04	0.033	0.028	0.022
56.8	0.086	0.068	0.065	0.051	0.04	0.033	0.027	0.022
57	0.086	0.069	0.065	0.051	0.04	0.033	0.027	0.022
57.2	0.086	0.069	0.064	0.051	0.041	0.033	0.028	0.022
57.4	0.086	0.069	0.065	0.051	0.041	0.033	0.027	0.022
57.6	0.086	0.069	0.065	0.052	0.04	0.033	0.027	0.022
57.8	0.086	0.069	0.065	0.052	0.039	0.033	0.026	0.022
58	0.086	0.07	0.065	0.052	0.039	0.033	0.026	0.022
58.2	0.087	0.07	0.065	0.052	0.039	0.033	0.026	0.022
58.4	0.087	0.07	0.065	0.052	0.039	0.034	0.026	0.022
58.6	0.087	0.07	0.065	0.052	0.039	0.034	0.027	0.022
58.8	0.088	0.07	0.065	0.052	0.039	0.034	0.028	0.022
59	0.088	0.071	0.066	0.053	0.04	0.034	0.028	0.022
59.2	0.089	0.071	0.066	0.053	0.04	0.034	0.028	0.022
59.4	0.089	0.071	0.066	0.053	0.041	0.034	0.029	0.023
59.6	0.089	0.071	0.066	0.053	0.041	0.034	0.028	0.023
59.8	0.09	0.071	0.066	0.053	0.041	0.034	0.029	0.023
60	0.089	0.072	0.067	0.053	0.042	0.034	0.029	0.023
60.2	0.09	0.072	0.066	0.054	0.043	0.034	0.029	0.023
60.4	0.089	0.072	0.066	0.054	0.043	0.035	0.029	0.023
60.6	0.09	0.072	0.066	0.054	0.044	0.035	0.029	0.023
60.8	0.089	0.072	0.067	0.054	0.044	0.035	0.029	0.023
61	0.089	0.073	0.067	0.054	0.044	0.035	0.029	0.023
61.2	0.089	0.073	0.067	0.054	0.044	0.035	0.029	0.023
61.4	0.09	0.073	0.068	0.054	0.043	0.035	0.028	0.023
61.6	0.089	0.073	0.068	0.055	0.043	0.035	0.028	0.023
61.8	0.089	0.073	0.068	0.055	0.043	0.035	0.028	0.023
62	0.09	0.074	0.068	0.055	0.043	0.035	0.029	0.023
62.2	0.09	0.074	0.068	0.055	0.043	0.035	0.029	0.023
62.4	0.09	0.074	0.068	0.055	0.043	0.035	0.029	0.024
62.6	0.091	0.074	0.068	0.055	0.043	0.036	0.03	0.024
62.8	0.091	0.074	0.068	0.055	0.044	0.036	0.03	0.024
63	0.091	0.074	0.069	0.056	0.044	0.036	0.031	0.024
63.2	0.09	0.075	0.068	0.056	0.043	0.036	0.03	0.024
63.4	0.091	0.075	0.068	0.056	0.044	0.036	0.03	0.024
63.6	0.091	0.075	0.069	0.056	0.044	0.036	0.03	0.024
63.8	0.091	0.075	0.07	0.056	0.045	0.036	0.031	0.024
64	0.09	0.075	0.07	0.056	0.045	0.036	0.031	0.024
64.2	0.09	0.076	0.069	0.056	0.044	0.036	0.031	0.024
64.4	0.09	0.076	0.07	0.057	0.044	0.036	0.031	0.024
64.6	0.09	0.076	0.07	0.057	0.044	0.037	0.031	0.024
64.8	0.09	0.076	0.07	0.057	0.044	0.037	0.03	0.024
65	0.09	0.076	0.07	0.057	0.044	0.037	0.03	0.024
65.2	0.09	0.077	0.07	0.057	0.044	0.037	0.03	0.024
65.4	0.09	0.077	0.07	0.057	0.044	0.037	0.03	0.025
65.6	0.091	0.077	0.07	0.057	0.044	0.037	0.03	0.025
65.8	0.091	0.077	0.069	0.058	0.044	0.037	0.029	0.025
66	0.092	0.077	0.069	0.058	0.044	0.037	0.029	0.025
66.2	0.092	0.078	0.069	0.058	0.044	0.037	0.029	0.025
66.4	0.092	0.078	0.069	0.058	0.043	0.037	0.029	0.025
66.6	0.093	0.078	0.069	0.058	0.043	0.038	0.029	0.025
66.8	0.092	0.078	0.068	0.058	0.042	0.038	0.028	0.025
67	0.092	0.078	0.068	0.058	0.041	0.038	0.028	0.025
67.2	0.092	0.078	0.068	0.059	0.041	0.038	0.028	0.025
67.4	0.093	0.079	0.068	0.059	0.042	0.038	0.028	0.025
67.6	0.093	0.079	0.069	0.059	0.042	0.038	0.028	0.025
67.8	0.093	0.079	0.069	0.059	0.042	0.038	0.028	0.025
68	0.093	0.079	0.07	0.059	0.042	0.038	0.029	0.025
68.2	0.093	0.079	0.071	0.059	0.042	0.038	0.029	0.025
68.4	0.094	0.08	0.071	0.059	0.043	0.038	0.029	0.025
68.6	0.094	0.08	0.071	0.06	0.043	0.038	0.029	0.026
68.8	0.094	0.08	0.072	0.06	0.043	0.039	0.029	0.026
69	0.095	0.08	0.072	0.06	0.044	0.039	0.03	0.026
69.2	0.095	0.08	0.072	0.06	0.044	0.039	0.03	0.026
69.4	0.095	0.08	0.073	0.06	0.044	0.039	0.03	0.026
69.6	0.095	0.081	0.073	0.06	0.044	0.039	0.03	0.026
69.8	0.096	0.081	0.073	0.06	0.045	0.039	0.03	0.026
70	0.095	0.081	0.072	0.061	0.045	0.039	0.03	0.026
70.2	0.095	0.081	0.072	0.061	0.045	0.039	0.03	0.026
70.4	0.096	0.081	0.072	0.061	0.045	0.039	0.03	0.026
70.6	0.096	0.082	0.072	0.061	0.045	0.039	0.031	0.026
70.8	0.096	0.082	0.072	0.061	0.045	0.039	0.031	0.026
71	0.096	0.082	0.073	0.061	0.046	0.04	0.032	0.026
71.2	0.096	0.082	0.072	0.061	0.046	0.04	0.032	0.026
71.4	0.096	0.082	0.072	0.062	0.046	0.04	0.032	0.026
71.6	0.096	0.083	0.073	0.062	0.047	0.04	0.031	0.026
71.8	0.097	0.083	0.073	0.062	0.046	0.04	0.031	0.027
72	0.096	0.083	0.073	0.062	0.046	0.04	0.032	0.027
72.2	0.096	0.083	0.074	0.062	0.046	0.04	0.031	0.027
72.4	0.096	0.083	0.074	0.062	0.045	0.04	0.031	0.027
72.6	0.097	0.083	0.074	0.062	0.045	0.04	0.03	0.027
72.8	0.097	0.084	0.074	0.063	0.044	0.04	0.03	0.027
73	0.097	0.084	0.074	0.063	0.045	0.04	0.03	0.027
73.2	0.097	0.084	0.074	0.063	0.044	0.041	0.03	0.027
73.4	0.097	0.084	0.074	0.063	0.044	0.041	0.03	0.027
73.6	0.097	0.084	0.073	0.063	0.044	0.041	0.03	0.027
73.8	0.098	0.084	0.074	0.063	0.044	0.041	0.031	0.027
74	0.098	0.085	0.074	0.063	0.045	0.041	0.03	0.027
74.2	0.098	0.085	0.075	0.064	0.045	0.041	0.031	0.027
74.4	0.099	0.085	0.075	0.064	0.046	0.041	0.031	0.027
74.6	0.099	0.085	0.076	0.064	0.047	0.041	0.032	0.027
74.8	0.1	0.085	0.076	0.064	0.048	0.041	0.033	0.027
75	0.099	0.086	0.076	0.064	0.048	0.041	0.033	0.028
75.2	0.099	0.086	0.076	0.064	0.048	0.042	0.032	0.028
75.4	0.099	0.086	0.076	0.064	0.049	0.042	0.033	0.028
75.6	0.099	0.086	0.077	0.064	0.049	0.042	0.033	0.028
75.8	0.098	0.086	0.077	0.065	0.049	0.042	0.033	0.028
76	0.098	0.086	0.077	0.065	0.048	0.042	0.033	0.028
76.2	0.098	0.087	0.077	0.065	0.048	0.042	0.033	0.028
76.4	0.099	0.087	0.077	0.065	0.048	0.042	0.033	0.028
76.6	0.098	0.087	0.077	0.065	0.048	0.042	0.033	0.028
76.8	0.098	0.087	0.077	0.065	0.048	0.042	0.033	0.028
77	0.099	0.087	0.077	0.065	0.048	0.042	0.033	0.028
77.2	0.099	0.087	0.077	0.066	0.048	0.042	0.033	0.028
77.4	0.1	0.088	0.076	0.066	0.048	0.042	0.033	0.028
77.6	0.1	0.088	0.076	0.066	0.048	0.043	0.033	0.028
77.8	0.101	0.088	0.077	0.066	0.048	0.043	0.033	0.028
78	0.101	0.088	0.077	0.066	0.048	0.043	0.033	0.028
78.2	0.101	0.088	0.076	0.066	0.048	0.043	0.032	0.029
78.4	0.101	0.089	0.077	0.066	0.049	0.043	0.033	0.029
78.6	0.102	0.089	0.077	0.066	0.049	0.043	0.033	0.029
78.8	0.101	0.089	0.077	0.067	0.049	0.043	0.033	0.029
79	0.101	0.089	0.076	0.067	0.049	0.043	0.033	0.029
79.2	0.101	0.089	0.077	0.067	0.049	0.043	0.033	0.029
79.4	0.102	0.089	0.077	0.067	0.05	0.043	0.033	0.029
79.6	0.102	0.09	0.077	0.067	0.049	0.043	0.033	0.029
79.8	0.102	0.09	0.077	0.067	0.049	0.044	0.033	0.029
80	0.102	0.09	0.077	0.067	0.048	0.044	0.033	0.029
80.2	0.102	0.09	0.077	0.068	0.048	0.044	0.033	0.029
80.4	0.102	0.09	0.077	0.068	0.048	0.044	0.033	0.029
80.6	0.102	0.09	0.077	0.068	0.048	0.044	0.033	0.029
80.8	0.102	0.091	0.077	0.068	0.048	0.044	0.034	0.029
81	0.103	0.091	0.078	0.068	0.048	0.044	0.034	0.029
81.2	0.102	0.091	0.078	0.068	0.049	0.044	0.034	0.029
81.4	0.102	0.091	0.078	0.068	0.049	0.044	0.033	0.029
81.6	0.102	0.091	0.078	0.068	0.049	0.044	0.033	0.03
81.8	0.103	0.091	0.079	0.069	0.05	0.044	0.034	0.03
82	0.102	0.092	0.079	0.069	0.05	0.045	0.033	0.03
82.2	0.102	0.092	0.079	0.069	0.05	0.045	0.033	0.03
82.4	0.102	0.092	0.079	0.069	0.05	0.045	0.034	0.03
82.6	0.102	0.092	0.079	0.069	0.051	0.045	0.034	0.03
82.8	0.102	0.092	0.079	0.069	0.05	0.045	0.034	0.03
83	0.102	0.092	0.079	0.069	0.051	0.045	0.034	0.03
83.2	0.103	0.093	0.079	0.07	0.051	0.045	0.034	0.03
83.4	0.103	0.093	0.079	0.07	0.05	0.045	0.033	0.03
83.6	0.103	0.093	0.079	0.07	0.05	0.045	0.033	0.03
83.8	0.104	0.093	0.079	0.07	0.05	0.045	0.033	0.03
84	0.105	0.093	0.08	0.07	0.05	0.045	0.034	0.03
84.2	0.105	0.093	0.08	0.07	0.049	0.046	0.034	0.03
84.4	0.105	0.094	0.08	0.07	0.05	0.046	0.034	0.03
84.6	0.105	0.094	0.081	0.07	0.049	0.046	0.035	0.03
84.8	0.106	0.094	0.081	0.071	0.05	0.046	0.035	0.031
85	0.106	0.094	0.081	0.071	0.05	0.046	0.035	0.031
85.2	0.106	0.094	0.081	0.071	0.051	0.046	0.036	0.031
85.4	0.106	0.094	0.081	0.071	0.051	0.046	0.036	0.031
85.6	0.106	0.095	0.082	0.071	0.052	0.046	0.036	0.031
85.8	0.107	0.095	0.082	0.071	0.053	0.046	0.036	0.031
86	0.107	0.095	0.082	0.071	0.053	0.046	0.036	0.031
86.2	0.107	0.095	0.082	0.071	0.052	0.046	0.036	0.031
86.4	0.107	0.095	0.082	0.072	0.053	0.046	0.036	0.031
86.6	0.107	0.095	0.082	0.072	0.053	0.047	0.036	0.031
86.8	0.107	0.096	0.081	0.072	0.052	0.047	0.036	0.031
87	0.107	0.096	0.081	0.072	0.053	0.047	0.035	0.031
87.2	0.107	0.096	0.081	0.072	0.052	0.047	0.035	0.031
87.4	0.107	0.096	0.081	0.072	0.052	0.047	0.035	0.031
87.6	0.108	0.096	0.081	0.072	0.051	0.047	0.035	0.031
87.8	0.108	0.096	0.081	0.072	0.051	0.047	0.035	0.031
88	0.108	0.097	0.081	0.073	0.051	0.047	0.035	0.031
88.2	0.107	0.097	0.081	0.073	0.05	0.047	0.034	0.032
88.4	0.107	0.097	0.081	0.073	0.05	0.047	0.035	0.032
88.6	0.106	0.097	0.081	0.073	0.05	0.047	0.035	0.032
88.8	0.106	0.097	0.081	0.073	0.05	0.047	0.034	0.032
89	0.106	0.097	0.081	0.073	0.05	0.048	0.034	0.032
89.2	0.106	0.098	0.081	0.073	0.05	0.048	0.035	0.032
89.4	0.106	0.098	0.082	0.074	0.05	0.048	0.034	0.032
89.6	0.106	0.098	0.082	0.074	0.05	0.048	0.034	0.032
89.8	0.106	0.098	0.082	0.074	0.05	0.048	0.034	0.032
90	0.106	0.098	0.082	0.074	0.05	0.048	0.035	0.032
90.2	0.106	0.098	0.082	0.074	0.05	0.048	0.034	0.032
90.4	0.107	0.099	0.083	0.074	0.05	0.048	0.035	0.032
90.6	0.107	0.099	0.083	0.074	0.05	0.048	0.035	0.032
90.8	0.108	0.099	0.083	0.074	0.051	0.048	0.035	0.032
91	0.109	0.099	0.083	0.075	0.051	0.048	0.035	0.032
91.2	0.109	0.099	0.083	0.075	0.052	0.048	0.035	0.032
91.4	0.11	0.099	0.083	0.075	0.052	0.049	0.035	0.032
91.6	0.11	0.1	0.083	0.075	0.052	0.049	0.036	0.032
91.8	0.11	0.1	0.083	0.075	0.053	0.049	0.037	0.033
92	0.11	0.1	0.083	0.075	0.053	0.049	0.037	0.033
92.2	0.11	0.1	0.083	0.075	0.053	0.049	0.037	0.033
92.4	0.11	0.1	0.083	0.075	0.053	0.049	0.037	0.033
92.6	0.11	0.1	0.082	0.076	0.054	0.049	0.037	0.033
92.8	0.111	0.1	0.083	0.076	0.054	0.049	0.037	0.033
93	0.111	0.101	0.083	0.076	0.054	0.049	0.038	0.033
93.2	0.11	0.101	0.083	0.076	0.054	0.049	0.038	0.033
93.4	0.11	0.101	0.083	0.076	0.053	0.049	0.037	0.033
93.6	0.11	0.101	0.082	0.076	0.053	0.049	0.036	0.033
93.8	0.109	0.101	0.083	0.076	0.053	0.05	0.036	0.033
94	0.11	0.101	0.084	0.076	0.053	0.05	0.037	0.033
94.2	0.11	0.102	0.084	0.076	0.052	0.05	0.036	0.033
94.4	0.11	0.102	0.084	0.077	0.053	0.05	0.036	0.033
94.6	0.11	0.102	0.084	0.077	0.053	0.05	0.036	0.033
94.8	0.11	0.102	0.084	0.077	0.053	0.05	0.036	0.033
95	0.11	0.102	0.084	0.077	0.053	0.05	0.036	0.033
95.2	0.11	0.102	0.084	0.077	0.052	0.05	0.036	0.034
95.4	0.11	0.103	0.084	0.077	0.053	0.05	0.036	0.034
95.6	0.11	0.103	0.084	0.077	0.053	0.05	0.036	0.034
95.8	0.11	0.103	0.084	0.077	0.053	0.05	0.036	0.034
96	0.111	0.103	0.084	0.078	0.053	0.05	0.036	0.034
96.2	0.11	0.103	0.084	0.078	0.053	0.051	0.036	0.034
96.4	0.111	0.103	0.085	0.078	0.053	0.051	0.036	0.034
96.6	0.112	0.103	0.085	0.078	0.054	0.051	0.037	0.034
96.8	0.112	0.104	0.085	0.078	0.053	0.051	0.036	0.034
97	0.112	0.104	0.085	0.078	0.053	0.051	0.036	0.034
97.2	0.112	0.104	0.085	0.078	0.053	0.051	0.036	0.034
97.4	0.113	0.104	0.084	0.078	0.053	0.051	0.036	0.034
97.6	0.112	0.104	0.084	0.079	0.053	0.051	0.036	0.034
97.8	0.113	0.104	0.085	0.079	0.053	0.051	0.036	0.034
98	0.113	0.105	0.085	0.079	0.054	0.051	0.036	0.034
98.2	0.112	0.105	0.085	0.079	0.054	0.051	0.036	0.034
98.4	0.112	0.105	0.086	0.079	0.055	0.051	0.036	0.034
98.6	0.113	0.105	0.086	0.079	0.055	0.052	0.037	0.034
98.8	0.113	0.105	0.086	0.079	0.056	0.052	0.037	0.035
99	0.113	0.105	0.086	0.079	0.055	0.052	0.037	0.035
99.2	0.113	0.105	0.086	0.08	0.056	0.052	0.037	0.035
99.4	0.113	0.106	0.087	0.08	0.056	0.052	0.037	0.035
99.6	0.113	0.106	0.087	0.08	0.056	0.052	0.037	0.035
99.8	0.114	0.106	0.087	0.08	0.056	0.052	0.037	0.035
100	0.114	0.106	0.087	0.08	0.056	0.052	0.037	0.035
100.2	0.113	0.106	0.086	0.08	0.055	0.052	0.037	0.035
100.4	0.113	0.106	0.086	0.08	0.055	0.052	0.037	0.035
100.6	0.113	0.106	0.086	0.08	0.055	0.052	0.037	0.035
100.8	0.113	0.107	0.086	0.08	0.055	0.052	0.037	0.035
101	0.114	0.107	0.086	0.081	0.055	0.053	0.036	0.035
101.2	0.114	0.107	0.086	0.081	0.056	0.053	0.037	0.035
101.4	0.114	0.107	0.085	0.081	0.055	0.053	0.037	0.035
101.6	0.114	0.107	0.086	0.081	0.055	0.053	0.037	0.035
101.8	0.115	0.107	0.086	0.081	0.056	0.053	0.038	0.035
102	0.115	0.108	0.087	0.081	0.057	0.053	0.039	0.035
102.2	0.115	0.108	0.087	0.081	0.056	0.053	0.039	0.035
102.4	0.116	0.108	0.088	0.081	0.057	0.053	0.04	0.036
102.6	0.117	0.108	0.088	0.082	0.057	0.053	0.04	0.036
102.8	0.117	0.108	0.088	0.082	0.056	0.053	0.04	0.036
103	0.116	0.108	0.088	0.082	0.055	0.053	0.04	0.036
103.2	0.116	0.108	0.088	0.082	0.056	0.053	0.039	0.036
103.4	0.116	0.109	0.088	0.082	0.055	0.053	0.039	0.036
103.6	0.116	0.109	0.088	0.082	0.055	0.054	0.039	0.036
103.8	0.115	0.109	0.088	0.082	0.055	0.054	0.039	0.036
104	0.115	0.109	0.087	0.082	0.055	0.054	0.039	0.036
104.2	0.115	0.109	0.087	0.082	0.055	0.054	0.038	0.036
104.4	0.115	0.109	0.087	0.083	0.055	0.054	0.038	0.036
104.6	0.115	0.109	0.087	0.083	0.056	0.054	0.038	0.036
104.8	0.115	0.11	0.088	0.083	0.056	0.054	0.038	0.036
105	0.115	0.11	0.088	0.083	0.056	0.054	0.037	0.036
105.2	0.115	0.11	0.088	0.083	0.056	0.054	0.037	0.036
105.4	0.115	0.11	0.088	0.083	0.056	0.054	0.037	0.036
105.6	0.116	0.11	0.09	0.083	0.057	0.054	0.038	0.036
105.8	0.117	0.11	0.091	0.083	0.058	0.054	0.039	0.036
106	0.118	0.11	0.091	0.083	0.059	0.054	0.04	0.037
106.2	0.118	0.111	0.091	0.084	0.059	0.055	0.04	0.037
106.4	0.119	0.111	0.091	0.084	0.06	0.055	0.041	0.037
106.6	0.119	0.111	0.091	0.084	0.06	0.055	0.041	0.037
106.8	0.119	0.111	0.091	0.084	0.06	0.055	0.041	0.037
107	0.119	0.111	0.09	0.084	0.06	0.055	0.041	0.037
107.2	0.119	0.111	0.09	0.084	0.059	0.055	0.041	0.037
107.4	0.119	0.111	0.09	0.084	0.059	0.055	0.041	0.037
107.6	0.119	0.112	0.09	0.084	0.059	0.055	0.041	0.037
107.8	0.119	0.112	0.089	0.084	0.059	0.055	0.041	0.037
108	0.119	0.112	0.089	0.085	0.059	0.055	0.041	0.037
108.2	0.118	0.112	0.088	0.085	0.058	0.055	0.04	0.037
108.4	0.118	0.112	0.088	0.085	0.058	0.055	0.04	0.037
108.6	0.118	0.112	0.088	0.085	0.058	0.055	0.04	0.037
108.8	0.117	0.112	0.088	0.085	0.057	0.056	0.04	0.037
109	0.117	0.113	0.087	0.085	0.057	0.056	0.039	0.037
109.2	0.117	0.113	0.087	0.085	0.057	0.056	0.039	0.037
109.4	0.117	0.113	0.088	0.085	0.057	0.056	0.039	0.037
109.6	0.118	0.113	0.089	0.086	0.057	0.056	0.04	0.037
109.8	0.118	0.113	0.089	0.086	0.058	0.056	0.04	0.038
110	0.119	0.113	0.089	0.086	0.058	0.056	0.04	0.038
110.2	0.118	0.113	0.089	0.086	0.057	0.056	0.04	0.038
110.4	0.118	0.114	0.089	0.086	0.057	0.056	0.041	0.038
110.6	0.118	0.114	0.089	0.086	0.057	0.056	0.041	0.038
110.8	0.119	0.114	0.09	0.086	0.058	0.056	0.041	0.038
111	0.118	0.114	0.09	0.086	0.058	0.056	0.041	0.038
111.2	0.118	0.114	0.091	0.086	0.058	0.056	0.041	0.038
111.4	0.118	0.114	0.091	0.087	0.058	0.057	0.041	0.038
111.6	0.118	0.114	0.091	0.087	0.058	0.057	0.041	0.038
111.8	0.118	0.115	0.091	0.087	0.058	0.057	0.041	0.038
112	0.119	0.115	0.092	0.087	0.059	0.057	0.041	0.038
112.2	0.119	0.115	0.091	0.087	0.059	0.057	0.041	0.038
112.4	0.119	0.115	0.092	0.087	0.059	0.057	0.04	0.038
112.6	0.119	0.115	0.091	0.087	0.059	0.057	0.04	0.038
112.8	0.12	0.115	0.091	0.087	0.059	0.057	0.04	0.038
113	0.12	0.115	0.091	0.087	0.059	0.057	0.04	0.038
113.2	0.12	0.116	0.091	0.088	0.06	0.057	0.04	0.038
113.4	0.121	0.116	0.092	0.088	0.06	0.057	0.041	0.038
113.6	0.121	0.116	0.091	0.088	0.059	0.057	0.041	0.039
113.8	0.122	0.116	0.091	0.088	0.06	0.057	0.041	0.039
114	0.122	0.116	0.091	0.088	0.059	0.058	0.041	0.039
114.2	0.122	0.116	0.091	0.088	0.059	0.058	0.041	0.039
114.4	0.121	0.116	0.091	0.088	0.059	0.058	0.041	0.039
114.6	0.121	0.117	0.092	0.088	0.059	0.058	0.04	0.039
114.8	0.122	0.117	0.092	0.088	0.06	0.058	0.041	0.039
115	0.121	0.117	0.092	0.088	0.059	0.058	0.04	0.039
115.2	0.121	0.117	0.093	0.089	0.06	0.058	0.04	0.039
115.4	0.121	0.117	0.093	0.089	0.06	0.058	0.04	0.039
115.6	0.121	0.117	0.094	0.089	0.059	0.058	0.04	0.039
115.8	0.122	0.117	0.094	0.089	0.06	0.058	0.041	0.039
116	0.122	0.118	0.094	0.089	0.06	0.058	0.041	0.039
116.2	0.122	0.118	0.093	0.089	0.06	0.058	0.041	0.039
116.4	0.123	0.118	0.094	0.089	0.06	0.058	0.041	0.039
116.6	0.123	0.118	0.094	0.089	0.06	0.058	0.041	0.039
116.8	0.123	0.118	0.094	0.089	0.06	0.059	0.042	0.039
117	0.123	0.118	0.094	0.09	0.06	0.059	0.043	0.039
117.2	0.124	0.118	0.094	0.09	0.061	0.059	0.043	0.039
117.4	0.124	0.118	0.094	0.09	0.061	0.059	0.043	0.04
117.6	0.124	0.119	0.094	0.09	0.06	0.059	0.043	0.04
117.8	0.123	0.119	0.094	0.09	0.06	0.059	0.043	0.04
118	0.123	0.119	0.093	0.09	0.06	0.059	0.042	0.04
118.2	0.122	0.119	0.093	0.09	0.06	0.059	0.042	0.04
118.4	0.122	0.119	0.094	0.09	0.061	0.059	0.042	0.04
118.6	0.122	0.119	0.094	0.09	0.061	0.059	0.041	0.04
118.8	0.123	0.119	0.095	0.091	0.06	0.059	0.041	0.04
119	0.123	0.12	0.095	0.091	0.061	0.059	0.041	0.04
119.2	0.124	0.12	0.095	0.091	0.061	0.059	0.041	0.04
119.4	0.123	0.12	0.095	0.091	0.061	0.06	0.04	0.04
119.6	0.123	0.12	0.094	0.091	0.061	0.06	0.041	0.04
119.8	0.123	0.12	0.094	0.091	0.061	0.06	0.041	0.04
120	0.124	0.12	0.094	0.091	0.061	0.06	0.041	0.04
120.2	0.124	0.12	0.094	0.091	0.062	0.06	0.041	0.04
120.4	0.124	0.12	0.094	0.091	0.062	0.06	0.041	0.04
120.6	0.124	0.121	0.094	0.091	0.062	0.06	0.042	0.04
120.8	0.124	0.121	0.094	0.092	0.062	0.06	0.042	0.04
121	0.124	0.121	0.094	0.092	0.062	0.06	0.042	0.04
121.2	0.124	0.121	0.094	0.092	0.062	0.06	0.042	0.04
121.4	0.124	0.121	0.094	0.092	0.062	0.06	0.042	0.041
121.6	0.124	0.121	0.095	0.092	0.062	0.06	0.042	0.041
121.8	0.123	0.121	0.095	0.092	0.062	0.06	0.042	0.041
122	0.123	0.122	0.095	0.092	0.062	0.06	0.042	0.041
122.2	0.123	0.122	0.095	0.092	0.061	0.061	0.042	0.041
122.4	0.124	0.122	0.095	0.092	0.062	0.061	0.042	0.041
122.6	0.124	0.122	0.096	0.093	0.061	0.061	0.042	0.041
122.8	0.124	0.122	0.096	0.093	0.061	0.061	0.043	0.041
123	0.124	0.122	0.096	0.093	0.061	0.061	0.043	0.041
123.2	0.124	0.122	0.097	0.093	0.062	0.061	0.043	0.041
123.4	0.124	0.122	0.096	0.093	0.061	0.061	0.043	0.041
123.6	0.124	0.123	0.096	0.093	0.062	0.061	0.043	0.041
123.8	0.125	0.123	0.097	0.093	0.063	0.061	0.043	0.041
124	0.125	0.123	0.097	0.093	0.063	0.061	0.044	0.041
124.2	0.125	0.123	0.097	0.093	0.063	0.061	0.044	0.041
124.4	0.126	0.123	0.097	0.093	0.064	0.061	0.043	0.041
124.6	0.126	0.123	0.097	0.094	0.064	0.061	0.044	0.041
124.8	0.126	0.123	0.098	0.094	0.064	0.061	0.044	0.041
125	0.127	0.123	0.098	0.094	0.064	0.062	0.043	0.041
125.2	0.127	0.124	0.098	0.094	0.064	0.062	0.043	0.041
125.4	0.128	0.124	0.099	0.094	0.065	0.062	0.044	0.042
125.6	0.128	0.124	0.098	0.094	0.065	0.062	0.044	0.042
125.8	0.129	0.124	0.098	0.094	0.065	0.062	0.043	0.042
126	0.129	0.124	0.098	0.094	0.064	0.062	0.043	0.042
126.2	0.129	0.124	0.097	0.094	0.063	0.062	0.043	0.042
126.4	0.129	0.124	0.098	0.094	0.063	0.062	0.044	0.042
126.6	0.129	0.124	0.098	0.095	0.063	0.062	0.044	0.042
126.8	0.129	0.125	0.097	0.095	0.063	0.062	0.045	0.042
127	0.129	0.125	0.098	0.095	0.063	0.062	0.044	0.042
127.2	0.129	0.125	0.098	0.095	0.063	0.062	0.044	0.042
127.4	0.13	0.125	0.098	0.095	0.064	0.062	0.045	0.042
127.6	0.13	0.125	0.099	0.095	0.064	0.062	0.045	0.042
127.8	0.129	0.125	0.099	0.095	0.064	0.063	0.045	0.042
128	0.129	0.125	0.1	0.095	0.065	0.063	0.045	0.042
128.2	0.128	0.125	0.1	0.095	0.065	0.063	0.044	0.042
128.4	0.129	0.126	0.1	0.095	0.065	0.063	0.045	0.042
128.6	0.128	0.126	0.1	0.096	0.064	0.063	0.044	0.042
128.8	0.129	0.126	0.101	0.096	0.065	0.063	0.044	0.042
129	0.128	0.126	0.1	0.096	0.065	0.063	0.044	0.042
129.2	0.129	0.126	0.1	0.096	0.065	0.063	0.044	0.042
129.4	0.129	0.126	0.099	0.096	0.065	0.063	0.044	0.043
129.6	0.129	0.126	0.098	0.096	0.064	0.063	0.043	0.043
129.8	0.129	0.126	0.098	0.096	0.064	0.063	0.043	0.043
130	0.128	0.127	0.097	0.096	0.063	0.063	0.043	0.043
130.2	0.128	0.127	0.097	0.096	0.063	0.063	0.043	0.043
130.4	0.128	0.127	0.097	0.097	0.063	0.063	0.044	0.043
130.6	0.127	0.127	0.096	0.097	0.063	0.063	0.043	0.043
130.8	0.127	0.127	0.096	0.097	0.063	0.064	0.043	0.043
131	0.127	0.127	0.096	0.097	0.063	0.064	0.043	0.043
131.2	0.127	0.127	0.097	0.097	0.063	0.064	0.042	0.043
131.4	0.127	0.127	0.097	0.097	0.063	0.064	0.042	0.043
131.6	0.127	0.128	0.097	0.097	0.063	0.064	0.042	0.043
131.8	0.126	0.128	0.097	0.097	0.063	0.064	0.042	0.043
132	0.126	0.128	0.097	0.097	0.063	0.064	0.042	0.043
132.2	0.127	0.128	0.097	0.097	0.063	0.064	0.041	0.043
132.4	0.127	0.128	0.097	0.097	0.063	0.064	0.041	0.043
132.6	0.127	0.128	0.098	0.098	0.063	0.064	0.041	0.043
132.8	0.127	0.128	0.098	0.098	0.063	0.064	0.041	0.043
133	0.128	0.128	0.098	0.098	0.064	0.064	0.041	0.043
133.2	0.128	0.129	0.098	0.098	0.063	0.064	0.042	0.043
133.4	0.128	0.129	0.099	0.098	0.063	0.064	0.042	0.043
133.6	0.128	0.129	0.099	0.098	0.063	0.065	0.042	0.044
133.8	0.129	0.129	0.099	0.098	0.063	0.065	0.043	0.044
134	0.128	0.129	0.099	0.098	0.063	0.065	0.043	0.044
134.2	0.128	0.129	0.099	0.098	0.064	0.065	0.044	0.044
134.4	0.128	0.129	0.099	0.098	0.063	0.065	0.044	0.044
134.6	0.128	0.129	0.099	0.099	0.063	0.065	0.044	0.044
134.8	0.128	0.13	0.099	0.099	0.063	0.065	0.044	0.044
135	0.129	0.13	0.099	0.099	0.063	0.065	0.043	0.044
135.2	0.129	0.13	0.1	0.099	0.063	0.065	0.043	0.044
135.4	0.129	0.13	0.099	0.099	0.063	0.065	0.043	0.044
135.6	0.13	0.13	0.1	0.099	0.063	0.065	0.044	0.044
135.8	0.131	0.13	0.1	0.099	0.064	0.065	0.044	0.044
136	0.131	0.13	0.099	0.099	0.064	0.065	0.044	0.044
136.2	0.131	0.13	0.099	0.099	0.065	0.065	0.044	0.044
136.4	0.131	0.131	0.1	0.099	0.065	0.065	0.044	0.044
136.6	0.132	0.131	0.1	0.1	0.065	0.066	0.044	0.044
136.8	0.132	0.131	0.101	0.1	0.066	0.066	0.044	0.044
137	0.132	0.131	0.101	0.1	0.066	0.066	0.045	0.044
137.2	0.132	0.131	0.102	0.1	0.066	0.066	0.045	0.044
137.4	0.132	0.131	0.102	0.1	0.066	0.066	0.045	0.044
137.6	0.132	0.131	0.102	0.1	0.066	0.066	0.045	0.044
137.8	0.132	0.131	0.102	0.1	0.066	0.066	0.046	0.045
138	0.132	0.131	0.102	0.1	0.066	0.066	0.046	0.045
138.2	0.131	0.132	0.102	0.1	0.066	0.066	0.045	0.045
138.4	0.132	0.132	0.102	0.1	0.067	0.066	0.046	0.045
138.6	0.132	0.132	0.103	0.1	0.066	0.066	0.046	0.045
138.8	0.132	0.132	0.102	0.101	0.066	0.066	0.046	0.045
139	0.132	0.132	0.102	0.101	0.066	0.066	0.046	0.045
139.2	0.132	0.132	0.102	0.101	0.066	0.066	0.046	0.045
139.4	0.132	0.132	0.101	0.101	0.066	0.066	0.046	0.045
139.6	0.133	0.132	0.102	0.101	0.067	0.067	0.046	0.045
139.8	0.133	0.133	0.102	0.101	0.067	0.067	0.046	0.045
140	0.133	0.133	0.102	0.101	0.067	0.067	0.046	0.045
140.2	0.133	0.133	0.103	0.101	0.067	0.067	0.046	0.045
140.4	0.134	0.133	0.103	0.101	0.067	0.067	0.046	0.045
140.6	0.133	0.133	0.103	0.101	0.067	0.067	0.046	0.045
140.8	0.134	0.133	0.103	0.102	0.067	0.067	0.045	0.045
141	0.134	0.133	0.103	0.102	0.066	0.067	0.045	0.045
141.2	0.133	0.133	0.103	0.102	0.066	0.067	0.045	0.045
141.4	0.132	0.133	0.102	0.102	0.066	0.067	0.044	0.045
141.6	0.132	0.134	0.102	0.102	0.066	0.067	0.044	0.045
141.8	0.132	0.134	0.102	0.102	0.065	0.067	0.044	0.045
142	0.132	0.134	0.102	0.102	0.065	0.067	0.044	0.046
142.2	0.132	0.134	0.102	0.102	0.065	0.067	0.043	0.046
142.4	0.132	0.134	0.101	0.102	0.066	0.067	0.044	0.046
142.6	0.132	0.134	0.101	0.102	0.066	0.068	0.043	0.046
142.8	0.131	0.134	0.101	0.102	0.066	0.068	0.043	0.046
143	0.132	0.134	0.101	0.103	0.066	0.068	0.044	0.046
143.2	0.132	0.134	0.101	0.103	0.067	0.068	0.044	0.046
143.4	0.132	0.135	0.101	0.103	0.067	0.068	0.044	0.046
143.6	0.132	0.135	0.102	0.103	0.068	0.068	0.045	0.046
143.8	0.133	0.135	0.103	0.103	0.068	0.068	0.046	0.046
144	0.133	0.135	0.103	0.103	0.068	0.068	0.046	0.046
144.2	0.134	0.135	0.103	0.103	0.068	0.068	0.046	0.046
144.4	0.134	0.135	0.104	0.103	0.068	0.068	0.047	0.046
144.6	0.134	0.135	0.104	0.103	0.068	0.068	0.048	0.046
144.8	0.135	0.135	0.105	0.103	0.068	0.068	0.048	0.046
145	0.135	0.136	0.105	0.103	0.068	0.068	0.048	0.046
145.2	0.135	0.136	0.105	0.104	0.068	0.068	0.048	0.046
145.4	0.135	0.136	0.105	0.104	0.067	0.068	0.048	0.046
145.6	0.135	0.136	0.105	0.104	0.067	0.068	0.047	0.046
145.8	0.135	0.136	0.104	0.104	0.067	0.069	0.047	0.046
146	0.135	0.136	0.104	0.104	0.066	0.069	0.047	0.046
146.2	0.134	0.136	0.104	0.104	0.066	0.069	0.046	0.046
146.4	0.134	0.136	0.103	0.104	0.066	0.069	0.045	0.047
146.6	0.135	0.136	0.103	0.104	0.067	0.069	0.045	0.047
146.8	0.135	0.137	0.103	0.104	0.067	0.069	0.045	0.047
147	0.135	0.137	0.103	0.104	0.067	0.069	0.045	0.047
147.2	0.135	0.137	0.103	0.104	0.068	0.069	0.045	0.047
147.4	0.135	0.137	0.103	0.105	0.068	0.069	0.046	0.047
147.6	0.135	0.137	0.103	0.105	0.068	0.069	0.047	0.047
147.8	0.136	0.137	0.103	0.105	0.068	0.069	0.047	0.047
148	0.136	0.137	0.103	0.105	0.068	0.069	0.047	0.047
148.2	0.136	0.137	0.103	0.105	0.068	0.069	0.047	0.047
148.4	0.136	0.137	0.103	0.105	0.068	0.069	0.047	0.047
148.6	0.136	0.138	0.103	0.105	0.069	0.069	0.047	0.047
148.8	0.137	0.138	0.104	0.105	0.069	0.069	0.048	0.047
149	0.137	0.138	0.104	0.105	0.069	0.07	0.048	0.047
149.2	0.136	0.138	0.104	0.105	0.069	0.07	0.048	0.047
149.4	0.137	0.138	0.104	0.105	0.068	0.07	0.048	0.047
149.6	0.136	0.138	0.104	0.106	0.069	0.07	0.048	0.047
149.8	0.136	0.138	0.105	0.106	0.069	0.07	0.048	0.047
150	0.135	0.138	0.105	0.106	0.069	0.07	0.047	0.047
150.2	0.135	0.138	0.105	0.106	0.069	0.07	0.047	0.047
150.4	0.135	0.139	0.105	0.106	0.069	0.07	0.047	0.047
150.6	0.136	0.139	0.106	0.106	0.07	0.07	0.047	0.047
150.8	0.136	0.139	0.106	0.106	0.07	0.07	0.048	0.047
151	0.136	0.139	0.106	0.106	0.07	0.07	0.048	0.048
151.2	0.136	0.139	0.106	0.106	0.071	0.07	0.048	0.048
151.4	0.137	0.139	0.107	0.106	0.071	0.07	0.048	0.048
151.6	0.137	0.139	0.107	0.106	0.071	0.07	0.048	0.048
151.8	0.137	0.139	0.107	0.107	0.071	0.07	0.048	0.048
152	0.137	0.139	0.107	0.107	0.072	0.07	0.048	0.048
152.2	0.138	0.139	0.107	0.107	0.072	0.071	0.048	0.048
152.4	0.138	0.14	0.106	0.107	0.071	0.071	0.048	0.048
152.6	0.138	0.14	0.106	0.107	0.071	0.071	0.048	0.048
152.8	0.138	0.14	0.106	0.107	0.07	0.071	0.048	0.048
153	0.138	0.14	0.106	0.107	0.07	0.071	0.048	0.048
153.2	0.138	0.14	0.106	0.107	0.07	0.071	0.048	0.048
153.4	0.138	0.14	0.105	0.107	0.069	0.071	0.048	0.048
153.6	0.137	0.14	0.105	0.107	0.069	0.071	0.048	0.048
153.8	0.137	0.14	0.105	0.107	0.069	0.071	0.047	0.048
154	0.136	0.14	0.105	0.107	0.069	0.071	0.047	0.048
154.2	0.136	0.141	0.104	0.108	0.069	0.071	0.047	0.048
154.4	0.136	0.141	0.105	0.108	0.069	0.071	0.047	0.048
154.6	0.137	0.141	0.105	0.108	0.07	0.071	0.048	0.048
154.8	0.137	0.141	0.105	0.108	0.071	0.071	0.047	0.048
155	0.137	0.141	0.106	0.108	0.071	0.071	0.047	0.048
155.2	0.137	0.141	0.106	0.108	0.072	0.071	0.048	0.048
155.4	0.137	0.141	0.106	0.108	0.072	0.072	0.048	0.049
155.6	0.138	0.141	0.107	0.108	0.072	0.072	0.049	0.049
155.8	0.139	0.141	0.108	0.108	0.074	0.072	0.049	0.049
156	0.139	0.142	0.108	0.108	0.074	0.072	0.05	0.049
156.2	0.14	0.142	0.109	0.108	0.074	0.072	0.05	0.049
156.4	0.14	0.142	0.109	0.109	0.074	0.072	0.05	0.049
156.6	0.14	0.142	0.11	0.109	0.074	0.072	0.05	0.049
156.8	0.141	0.142	0.11	0.109	0.075	0.072	0.051	0.049
157	0.141	0.142	0.111	0.109	0.074	0.072	0.051	0.049
157.2	0.141	0.142	0.11	0.109	0.074	0.072	0.05	0.049
157.4	0.141	0.142	0.11	0.109	0.073	0.072	0.05	0.049
157.6	0.14	0.142	0.11	0.109	0.072	0.072	0.049	0.049
157.8	0.14	0.142	0.109	0.109	0.072	0.072	0.049	0.049
158	0.14	0.143	0.109	0.109	0.072	0.072	0.049	0.049
158.2	0.14	0.143	0.108	0.109	0.071	0.072	0.048	0.049
158.4	0.139	0.143	0.108	0.109	0.071	0.072	0.048	0.049
158.6	0.139	0.143	0.107	0.109	0.071	0.072	0.048	0.049
158.8	0.138	0.143	0.107	0.11	0.071	0.073	0.047	0.049
159	0.138	0.143	0.107	0.11	0.07	0.073	0.047	0.049
159.2	0.138	0.143	0.106	0.11	0.071	0.073	0.047	0.049
159.4	0.138	0.143	0.106	0.11	0.07	0.073	0.047	0.049
159.6	0.137	0.143	0.106	0.11	0.071	0.073	0.047	0.049
159.8	0.138	0.143	0.106	0.11	0.071	0.073	0.047	0.049
160	0.138	0.144	0.106	0.11	0.072	0.073	0.047	0.049
160.2	0.138	0.144	0.107	0.11	0.072	0.073	0.048	0.05
160.4	0.138	0.144	0.107	0.11	0.072	0.073	0.048	0.05
160.6	0.139	0.144	0.108	0.11	0.072	0.073	0.049	0.05
160.8	0.139	0.144	0.107	0.11	0.072	0.073	0.048	0.05
161	0.139	0.144	0.108	0.11	0.072	0.073	0.049	0.05
161.2	0.139	0.144	0.108	0.111	0.072	0.073	0.049	0.05
161.4	0.139	0.144	0.109	0.111	0.072	0.073	0.049	0.05
161.6	0.14	0.144	0.109	0.111	0.072	0.073	0.049	0.05
161.8	0.141	0.145	0.109	0.111	0.072	0.073	0.049	0.05
162	0.141	0.145	0.109	0.111	0.072	0.074	0.05	0.05
162.2	0.141	0.145	0.109	0.111	0.072	0.074	0.049	0.05
162.4	0.142	0.145	0.11	0.111	0.072	0.074	0.049	0.05
162.6	0.142	0.145	0.11	0.111	0.073	0.074	0.049	0.05
162.8	0.142	0.145	0.11	0.111	0.073	0.074	0.05	0.05
163	0.142	0.145	0.11	0.111	0.073	0.074	0.05	0.05
163.2	0.142	0.145	0.111	0.111	0.074	0.074	0.05	0.05
163.4	0.143	0.145	0.111	0.111	0.074	0.074	0.05	0.05
163.6	0.143	0.145	0.111	0.112	0.075	0.074	0.05	0.05
163.8	0.143	0.146	0.111	0.112	0.075	0.074	0.05	0.05
164	0.143	0.146	0.111	0.112	0.075	0.074	0.051	0.05
164.2	0.142	0.146	0.11	0.112	0.074	0.074	0.051	0.05
164.4	0.143	0.146	0.11	0.112	0.074	0.074	0.051	0.05
164.6	0.142	0.146	0.111	0.112	0.074	0.074	0.052	0.05
164.8	0.142	0.146	0.11	0.112	0.074	0.074	0.051	0.051
165	0.142	0.146	0.111	0.112	0.074	0.074	0.052	0.051
165.2	0.142	0.146	0.111	0.112	0.074	0.074	0.052	0.051
165.4	0.142	0.146	0.111	0.112	0.074	0.074	0.052	0.051
165.6	0.143	0.146	0.111	0.112	0.074	0.075	0.052	0.051
165.8	0.143	0.147	0.111	0.112	0.074	0.075	0.051	0.051
166	0.143	0.147	0.11	0.113	0.073	0.075	0.051	0.051
166.2	0.142	0.147	0.11	0.113	0.073	0.075	0.05	0.051
166.4	0.143	0.147	0.11	0.113	0.074	0.075	0.05	0.051
166.6	0.142	0.147	0.11	0.113	0.074	0.075	0.05	0.051
166.8	0.142	0.147	0.11	0.113	0.074	0.075	0.049	0.051
167	0.142	0.147	0.109	0.113	0.074	0.075	0.049	0.051
167.2	0.143	0.147	0.11	0.113	0.074	0.075	0.049	0.051
167.4	0.143	0.147	0.11	0.113	0.074	0.075	0.049	0.051
167.6	0.144	0.147	0.11	0.113	0.074	0.075	0.049	0.051
167.8	0.144	0.147	0.11	0.113	0.074	0.075	0.049	0.051
168	0.144	0.148	0.11	0.113	0.074	0.075	0.049	0.051
168.2	0.143	0.148	0.11	0.113	0.074	0.075	0.049	0.051
168.4	0.144	0.148	0.111	0.113	0.074	0.075	0.049	0.051
168.6	0.144	0.148	0.111	0.114	0.074	0.075	0.05	0.051
168.8	0.144	0.148	0.111	0.114	0.075	0.075	0.05	0.051
169	0.144	0.148	0.111	0.114	0.075	0.076	0.05	0.051
169.2	0.144	0.148	0.111	0.114	0.074	0.076	0.05	0.051
169.4	0.144	0.148	0.111	0.114	0.075	0.076	0.05	0.051
169.6	0.144	0.148	0.111	0.114	0.075	0.076	0.051	0.051
169.8	0.144	0.148	0.111	0.114	0.075	0.076	0.051	0.052
170	0.144	0.149	0.111	0.114	0.074	0.076	0.05	0.052
170.2	0.144	0.149	0.111	0.114	0.075	0.076	0.05	0.052
170.4	0.144	0.149	0.111	0.114	0.075	0.076	0.05	0.052
170.6	0.144	0.149	0.111	0.114	0.075	0.076	0.05	0.052
170.8	0.144	0.149	0.111	0.114	0.075	0.076	0.05	0.052
171	0.145	0.149	0.111	0.115	0.075	0.076	0.05	0.052
171.2	0.145	0.149	0.112	0.115	0.075	0.076	0.05	0.052
171.4	0.146	0.149	0.112	0.115	0.076	0.076	0.05	0.052
171.6	0.146	0.149	0.113	0.115	0.076	0.076	0.051	0.052
171.8	0.146	0.149	0.112	0.115	0.076	0.076	0.051	0.052
172	0.146	0.15	0.113	0.115	0.075	0.076	0.051	0.052
172.2	0.145	0.15	0.113	0.115	0.075	0.076	0.051	0.052
172.4	0.145	0.15	0.113	0.115	0.075	0.076	0.051	0.052
172.6	0.146	0.15	0.113	0.115	0.075	0.077	0.052	0.052
172.8	0.146	0.15	0.113	0.115	0.075	0.077	0.053	0.052
173	0.146	0.15	0.113	0.115	0.074	0.077	0.052	0.052
173.2	0.146	0.15	0.113	0.115	0.074	0.077	0.053	0.052
173.4	0.146	0.15	0.113	0.115	0.074	0.077	0.053	0.052
173.6	0.146	0.15	0.113	0.116	0.075	0.077	0.053	0.052
173.8	0.145	0.15	0.113	0.116	0.075	0.077	0.052	0.052
174	0.146	0.15	0.114	0.116	0.075	0.077	0.052	0.052
174.2	0.146	0.151	0.114	0.116	0.076	0.077	0.052	0.052
174.4	0.145	0.151	0.114	0.116	0.076	0.077	0.052	0.052
174.6	0.146	0.151	0.114	0.116	0.077	0.077	0.052	0.053
174.8	0.145	0.151	0.114	0.116	0.077	0.077	0.051	0.053
175	0.146	0.151	0.115	0.116	0.077	0.077	0.051	0.053
175.2	0.146	0.151	0.115	0.116	0.077	0.077	0.051	0.053
175.4	0.146	0.151	0.115	0.116	0.077	0.077	0.051	0.053
175.6	0.146	0.151	0.115	0.116	0.078	0.077	0.051	0.053
175.8	0.146	0.151	0.115	0.116	0.077	0.077	0.052	0.053
176	0.146	0.151	0.116	0.116	0.077	0.077	0.051	0.053
176.2	0.146	0.151	0.115	0.117	0.076	0.078	0.052	0.053
176.4	0.146	0.152	0.115	0.117	0.076	0.078	0.052	0.053
176.6	0.146	0.152	0.115	0.117	0.076	0.078	0.052	0.053
176.8	0.146	0.152	0.114	0.117	0.075	0.078	0.052	0.053
177	0.146	0.152	0.114	0.117	0.075	0.078	0.052	0.053
177.2	0.146	0.152	0.114	0.117	0.075	0.078	0.052	0.053
177.4	0.146	0.152	0.114	0.117	0.074	0.078	0.052	0.053
177.6	0.146	0.152	0.114	0.117	0.074	0.078	0.052	0.053
177.8	0.146	0.152	0.114	0.117	0.074	0.078	0.052	0.053
178	0.146	0.152	0.114	0.117	0.074	0.078	0.052	0.053
178.2	0.146	0.152	0.114	0.117	0.074	0.078	0.052	0.053
178.4	0.146	0.152	0.114	0.117	0.074	0.078	0.052	0.053
178.6	0.146	0.153	0.114	0.117	0.074	0.078	0.052	0.053
178.8	0.146	0.153	0.114	0.118	0.075	0.078	0.052	0.053
179	0.146	0.153	0.115	0.118	0.076	0.078	0.052	0.053
179.2	0.146	0.153	0.115	0.118	0.076	0.078	0.053	0.053
179.4	0.147	0.153	0.115	0.118	0.077	0.078	0.053	0.053
179.6	0.147	0.153	0.116	0.118	0.078	0.078	0.053	0.053
179.8	0.147	0.153	0.117	0.118	0.078	0.079	0.054	0.054
180	0.147	0.153	0.117	0.118	0.078	0.079	0.053	0.054
180.2	0.148	0.153	0.117	0.118	0.079	0.079	0.053	0.054
180.4	0.148	0.153	0.116	0.118	0.078	0.079	0.053	0.054
180.6	0.148	0.153	0.116	0.118	0.078	0.079	0.052	0.054
180.8	0.148	0.154	0.116	0.118	0.078	0.079	0.052	0.054
181	0.148	0.154	0.116	0.118	0.078	0.079	0.052	0.054
181.2	0.148	0.154	0.116	0.118	0.079	0.079	0.052	0.054
181.4	0.149	0.154	0.116	0.118	0.079	0.079	0.052	0.054
181.6	0.148	0.154	0.116	0.119	0.078	0.079	0.052	0.054
181.8	0.148	0.154	0.116	0.119	0.078	0.079	0.052	0.054
182	0.149	0.154	0.116	0.119	0.078	0.079	0.052	0.054
182.2	0.148	0.154	0.116	0.119	0.078	0.079	0.052	0.054
182.4	0.148	0.154	0.117	0.119	0.078	0.079	0.052	0.054
182.6	0.148	0.154	0.117	0.119	0.078	0.079	0.053	0.054
182.8	0.148	0.154	0.117	0.119	0.078	0.079	0.053	0.054
183	0.148	0.155	0.117	0.119	0.078	0.079	0.054	0.054
183.2	0.148	0.155	0.118	0.119	0.078	0.079	0.054	0.054
183.4	0.149	0.155	0.118	0.119	0.078	0.079	0.054	0.054
183.6	0.149	0.155	0.118	0.119	0.078	0.08	0.055	0.054
183.8	0.149	0.155	0.117	0.119	0.078	0.08	0.055	0.054
184	0.149	0.155	0.117	0.119	0.078	0.08	0.054	0.054
184.2	0.149	0.155	0.117	0.12	0.078	0.08	0.054	0.054
184.4	0.149	0.155	0.116	0.12	0.077	0.08	0.054	0.054
184.6	0.149	0.155	0.116	0.12	0.077	0.08	0.053	0.054
184.8	0.149	0.155	0.116	0.12	0.078	0.08	0.053	0.054
185	0.149	0.155	0.116	0.12	0.078	0.08	0.053	0.055
185.2	0.149	0.156	0.116	0.12	0.078	0.08	0.052	0.055
185.4	0.15	0.156	0.116	0.12	0.078	0.08	0.052	0.055
185.6	0.149	0.156	0.115	0.12	0.078	0.08	0.052	0.055
185.8	0.149	0.156	0.116	0.12	0.078	0.08	0.052	0.055
186	0.15	0.156	0.116	0.12	0.079	0.08	0.053	0.055
186.2	0.15	0.156	0.116	0.12	0.079	0.08	0.053	0.055
186.4	0.15	0.156	0.116	0.12	0.079	0.08	0.054	0.055
186.6	0.15	0.156	0.116	0.12	0.079	0.08	0.054	0.055
186.8	0.15	0.156	0.116	0.12	0.079	0.08	0.055	0.055
187	0.15	0.156	0.116	0.121	0.079	0.08	0.055	0.055
187.2	0.15	0.156	0.117	0.121	0.079	0.08	0.055	0.055
187.4	0.15	0.156	0.117	0.121	0.079	0.081	0.055	0.055
187.6	0.15	0.157	0.117	0.121	0.079	0.081	0.056	0.055
187.8	0.15	0.157	0.117	0.121	0.079	0.081	0.056	0.055
188	0.15	0.157	0.117	0.121	0.079	0.081	0.056	0.055
188.2	0.151	0.157	0.117	0.121	0.079	0.081	0.055	0.055
188.4	0.151	0.157	0.117	0.121	0.079	0.081	0.055	0.055
188.6	0.151	0.157	0.117	0.121	0.079	0.081	0.054	0.055
188.8	0.151	0.157	0.117	0.121	0.079	0.081	0.055	0.055
189	0.151	0.157	0.117	0.121	0.079	0.081	0.054	0.055
189.2	0.151	0.157	0.117	0.121	0.079	0.081	0.054	0.055
189.4	0.151	0.157	0.117	0.121	0.078	0.081	0.053	0.055
189.6	0.151	0.157	0.117	0.121	0.078	0.081	0.053	0.055
189.8	0.152	0.157	0.117	0.122	0.078	0.081	0.053	0.055
190	0.152	0.158	0.117	0.122	0.078	0.081	0.053	0.055
190.2	0.152	0.158	0.117	0.122	0.078	0.081	0.053	0.056
190.4	0.152	0.158	0.117	0.122	0.077	0.081	0.054	0.056
190.6	0.152	0.158	0.117	0.122	0.077	0.081	0.053	0.056
190.8	0.152	0.158	0.117	0.122	0.078	0.081	0.054	0.056
191	0.152	0.158	0.117	0.122	0.078	0.081	0.054	0.056
191.2	0.152	0.158	0.117	0.122	0.078	0.081	0.055	0.056
191.4	0.152	0.158	0.117	0.122	0.078	0.082	0.055	0.056
191.6	0.152	0.158	0.118	0.122	0.079	0.082	0.056	0.056
191.8	0.152	0.158	0.118	0.122	0.079	0.082	0.057	0.056
192	0.152	0.158	0.118	0.122	0.079	0.082	0.057	0.056
192.2	0.152	0.158	0.118	0.122	0.08	0.082	0.057	0.056
192.4	0.152	0.159	0.118	0.122	0.08	0.082	0.057	0.056
192.6	0.153	0.159	0.118	0.123	0.081	0.082	0.057	0.056
192.8	0.153	0.159	0.118	0.123	0.081	0.082	0.057	0.056
193	0.153	0.159	0.118	0.123	0.081	0.082	0.057	0.056
193.2	0.153	0.159	0.118	0.123	0.08	0.082	0.056	0.056
193.4	0.153	0.159	0.118	0.123	0.08	0.082	0.056	0.056
193.6	0.154	0.159	0.119	0.123	0.08	0.082	0.055	0.056
193.8	0.154	0.159	0.119	0.123	0.08	0.082	0.055	0.056
194	0.154	0.159	0.119	0.123	0.08	0.082	0.055	0.056
194.2	0.153	0.159	0.119	0.123	0.08	0.082	0.055	0.056
194.4	0.153	0.159	0.118	0.123	0.08	0.082	0.055	0.056
194.6	0.154	0.159	0.118	0.123	0.081	0.082	0.055	0.056
194.8	0.154	0.16	0.118	0.123	0.081	0.082	0.055	0.056
195	0.153	0.16	0.118	0.123	0.081	0.082	0.055	0.056
195.2	0.153	0.16	0.117	0.123	0.081	0.083	0.055	0.056
195.4	0.153	0.16	0.117	0.123	0.081	0.083	0.056	0.056
195.6	0.152	0.16	0.118	0.124	0.081	0.083	0.056	0.057
195.8	0.152	0.16	0.117	0.124	0.081	0.083	0.056	0.057
196	0.152	0.16	0.118	0.124	0.081	0.083	0.055	0.057
196.2	0.152	0.16	0.118	0.124	0.081	0.083	0.055	0.057
196.4	0.153	0.16	0.118	0.124	0.081	0.083	0.055	0.057
196.6	0.152	0.16	0.118	0.124	0.081	0.083	0.055	0.057
196.8	0.153	0.16	0.118	0.124	0.081	0.083	0.055	0.057
197	0.153	0.16	0.118	0.124	0.081	0.083	0.056	0.057
197.2	0.153	0.161	0.118	0.124	0.08	0.083	0.055	0.057
197.4	0.154	0.161	0.119	0.124	0.08	0.083	0.055	0.057
197.6	0.154	0.161	0.12	0.124	0.081	0.083	0.055	0.057
197.8	0.153	0.161	0.12	0.124	0.08	0.083	0.055	0.057
198	0.154	0.161	0.119	0.124	0.08	0.083	0.054	0.057
198.2	0.153	0.161	0.12	0.124	0.08	0.083	0.054	0.057
198.4	0.154	0.161	0.119	0.125	0.08	0.083	0.054	0.057
198.6	0.154	0.161	0.119	0.125	0.081	0.083	0.055	0.057
198.8	0.154	0.161	0.119	0.125	0.081	0.083	0.054	0.057
199	0.154	0.161	0.12	0.125	0.081	0.083	0.055	0.057
199.2	0.154	0.161	0.12	0.125	0.081	0.083	0.055	0.057
199.4	0.154	0.161	0.12	0.125	0.081	0.084	0.055	0.057
199.6	0.154	0.162	0.121	0.125	0.081	0.084	0.055	0.057
199.8	0.155	0.162	0.121	0.125	0.081	0.084	0.055	0.057
200	0.155	0.162	0.121	0.125	0.081	0.084	0.055	0.057
200.2	0.156	0.162	0.122	0.125	0.082	0.084	0.056	0.057
200.4	0.155	0.162	0.122	0.125	0.082	0.084	0.056	0.057
200.6	0.156	0.162	0.122	0.125	0.082	0.084	0.057	0.057
200.8	0.156	0.162	0.122	0.125	0.082	0.084	0.057	0.057
201	0.156	0.162	0.123	0.125	0.082	0.084	0.057	0.057
201.2	0.156	0.162	0.123	0.125	0.082	0.084	0.057	0.058
201.4	0.156	0.162	0.122	0.126	0.083	0.084	0.057	0.058
201.6	0.156	0.162	0.122	0.126	0.083	0.084	0.057	0.058
201.8	0.155	0.162	0.121	0.126	0.083	0.084	0.056	0.058
202	0.155	0.162	0.12	0.126	0.083	0.084	0.056	0.058
202.2	0.155	0.163	0.12	0.126	0.083	0.084	0.056	0.058
202.4	0.155	0.163	0.12	0.126	0.083	0.084	0.055	0.058
202.6	0.155	0.163	0.12	0.126	0.083	0.084	0.056	0.058
202.8	0.155	0.163	0.12	0.126	0.082	0.084	0.055	0.058
203	0.155	0.163	0.119	0.126	0.081	0.084	0.055	0.058
203.2	0.155	0.163	0.12	0.126	0.081	0.084	0.055	0.058
203.4	0.155	0.163	0.12	0.126	0.081	0.085	0.054	0.058
203.6	0.155	0.163	0.12	0.126	0.081	0.085	0.054	0.058
203.8	0.155	0.163	0.121	0.126	0.081	0.085	0.055	0.058
204	0.156	0.163	0.121	0.126	0.081	0.085	0.055	0.058
204.2	0.156	0.163	0.121	0.126	0.081	0.085	0.055	0.058
204.4	0.156	0.163	0.122	0.126	0.08	0.085	0.055	0.058
204.6	0.156	0.163	0.122	0.127	0.081	0.085	0.055	0.058
204.8	0.156	0.164	0.122	0.127	0.08	0.085	0.055	0.058
205	0.156	0.164	0.122	0.127	0.081	0.085	0.055	0.058
205.2	0.156	0.164	0.122	0.127	0.081	0.085	0.054	0.058
205.4	0.156	0.164	0.121	0.127	0.081	0.085	0.055	0.058
205.6	0.157	0.164	0.121	0.127	0.081	0.085	0.055	0.058
205.8	0.156	0.164	0.121	0.127	0.081	0.085	0.055	0.058
206	0.156	0.164	0.122	0.127	0.081	0.085	0.055	0.058
206.2	0.156	0.164	0.122	0.127	0.081	0.085	0.055	0.058
206.4	0.157	0.164	0.122	0.127	0.081	0.085	0.055	0.058
206.6	0.157	0.164	0.122	0.127	0.082	0.085	0.056	0.058
206.8	0.157	0.164	0.122	0.127	0.082	0.085	0.056	0.058
207	0.157	0.164	0.121	0.127	0.082	0.085	0.055	0.059
207.2	0.157	0.164	0.122	0.127	0.083	0.085	0.056	0.059
207.4	0.157	0.165	0.122	0.127	0.083	0.085	0.055	0.059
207.6	0.157	0.165	0.122	0.128	0.083	0.086	0.056	0.059
207.8	0.157	0.165	0.122	0.128	0.083	0.086	0.056	0.059
208	0.158	0.165	0.122	0.128	0.083	0.086	0.057	0.059
208.2	0.157	0.165	0.121	0.128	0.083	0.086	0.056	0.059
208.4	0.157	0.165	0.121	0.128	0.082	0.086	0.056	0.059
208.6	0.158	0.165	0.121	0.128	0.082	0.086	0.056	0.059
208.8	0.158	0.165	0.121	0.128	0.081	0.086	0.056	0.059
209	0.158	0.165	0.121	0.128	0.082	0.086	0.056	0.059
209.2	0.157	0.165	0.121	0.128	0.082	0.086	0.056	0.059
209.4	0.157	0.165	0.121	0.128	0.081	0.086	0.056	0.059
209.6	0.157	0.165	0.121	0.128	0.082	0.086	0.056	0.059
209.8	0.157	0.165	0.122	0.128	0.082	0.086	0.056	0.059
210	0.157	0.165	0.122	0.128	0.083	0.086	0.056	0.059
210.2	0.157	0.166	0.122	0.128	0.083	0.086	0.056	0.059
210.4	0.157	0.166	0.122	0.128	0.084	0.086	0.056	0.059
210.6	0.156	0.166	0.122	0.128	0.084	0.086	0.056	0.059
210.8	0.157	0.166	0.123	0.129	0.084	0.086	0.056	0.059
211	0.157	0.166	0.123	0.129	0.084	0.086	0.056	0.059
211.2	0.157	0.166	0.123	0.129	0.085	0.086	0.056	0.059
211.4	0.158	0.166	0.123	0.129	0.085	0.086	0.056	0.059
211.6	0.159	0.166	0.123	0.129	0.085	0.086	0.057	0.059
211.8	0.159	0.166	0.123	0.129	0.085	0.086	0.056	0.059
212	0.159	0.166	0.123	0.129	0.084	0.087	0.056	0.059
212.2	0.159	0.166	0.123	0.129	0.084	0.087	0.056	0.059
212.4	0.159	0.166	0.123	0.129	0.083	0.087	0.056	0.059
212.6	0.158	0.166	0.123	0.129	0.083	0.087	0.056	0.059
212.8	0.158	0.167	0.123	0.129	0.083	0.087	0.056	0.06
213	0.157	0.167	0.123	0.129	0.084	0.087	0.056	0.06
213.2	0.157	0.167	0.123	0.129	0.083	0.087	0.056	0.06
213.4	0.157	0.167	0.123	0.129	0.083	0.087	0.056	0.06
213.6	0.157	0.167	0.123	0.129	0.083	0.087	0.056	0.06
213.8	0.158	0.167	0.124	0.129	0.084	0.087	0.056	0.06
214	0.158	0.167	0.124	0.13	0.084	0.087	0.057	0.06
214.2	0.157	0.167	0.124	0.13	0.084	0.087	0.057	0.06
214.4	0.157	0.167	0.124	0.13	0.085	0.087	0.057	0.06
214.6	0.158	0.167	0.124	0.13	0.085	0.087	0.057	0.06
214.8	0.158	0.167	0.124	0.13	0.085	0.087	0.057	0.06
215	0.158	0.167	0.123	0.13	0.085	0.087	0.057	0.06
215.2	0.158	0.167	0.123	0.13	0.086	0.087	0.057	0.06
215.4	0.159	0.167	0.123	0.13	0.086	0.087	0.058	0.06
215.6	0.159	0.168	0.124	0.13	0.085	0.087	0.058	0.06
215.8	0.159	0.168	0.124	0.13	0.085	0.087	0.058	0.06
216	0.159	0.168	0.124	0.13	0.085	0.087	0.058	0.06
216.2	0.159	0.168	0.124	0.13	0.085	0.087	0.058	0.06
216.4	0.159	0.168	0.124	0.13	0.085	0.088	0.058	0.06
216.6	0.159	0.168	0.124	0.13	0.085	0.088	0.058	0.06
216.8	0.159	0.168	0.125	0.13	0.086	0.088	0.059	0.06
217	0.16	0.168	0.126	0.13	0.086	0.088	0.059	0.06
217.2	0.16	0.168	0.125	0.131	0.086	0.088	0.059	0.06
217.4	0.16	0.168	0.126	0.131	0.086	0.088	0.06	0.06
217.6	0.161	0.168	0.126	0.131	0.087	0.088	0.06	0.06
217.8	0.161	0.168	0.127	0.131	0.087	0.088	0.061	0.06
218	0.161	0.168	0.127	0.131	0.087	0.088	0.061	0.06
218.2	0.161	0.168	0.126	0.131	0.087	0.088	0.06	0.06
218.4	0.161	0.169	0.126	0.131	0.087	0.088	0.06	0.06
218.6	0.162	0.169	0.125	0.131	0.087	0.088	0.06	0.06
218.8	0.161	0.169	0.125	0.131	0.087	0.088	0.059	0.061
219	0.161	0.169	0.124	0.131	0.086	0.088	0.059	0.061
219.2	0.161	0.169	0.124	0.131	0.085	0.088	0.059	0.061
219.4	0.161	0.169	0.125	0.131	0.085	0.088	0.059	0.061
219.6	0.161	0.169	0.125	0.131	0.085	0.088	0.059	0.061
219.8	0.161	0.169	0.124	0.131	0.085	0.088	0.058	0.061
220	0.162	0.169	0.124	0.131	0.085	0.088	0.058	0.061
220.2	0.162	0.169	0.125	0.131	0.085	0.088	0.058	0.061
220.4	0.162	0.169	0.125	0.131	0.085	0.088	0.058	0.061
220.6	0.162	0.169	0.125	0.132	0.086	0.088	0.059	0.061
220.8	0.162	0.169	0.125	0.132	0.086	0.088	0.059	0.061
221	0.162	0.169	0.125	0.132	0.087	0.089	0.059	0.061
221.2	0.162	0.17	0.125	0.132	0.087	0.089	0.059	0.061
221.4	0.162	0.17	0.126	0.132	0.087	0.089	0.059	0.061
221.6	0.163	0.17	0.126	0.132	0.087	0.089	0.059	0.061
221.8	0.162	0.17	0.127	0.132	0.087	0.089	0.059	0.061
222	0.162	0.17	0.127	0.132	0.087	0.089	0.06	0.061
222.2	0.162	0.17	0.127	0.132	0.086	0.089	0.059	0.061
222.4	0.162	0.17	0.126	0.132	0.086	0.089	0.058	0.061
222.6	0.162	0.17	0.126	0.132	0.085	0.089	0.058	0.061
222.8	0.161	0.17	0.127	0.132	0.085	0.089	0.059	0.061
223	0.161	0.17	0.126	0.132	0.085	0.089	0.058	0.061
223.2	0.161	0.17	0.126	0.132	0.084	0.089	0.058	0.061
223.4	0.16	0.17	0.126	0.132	0.084	0.089	0.058	0.061
223.6	0.16	0.17	0.125	0.132	0.084	0.089	0.058	0.061
223.8	0.161	0.17	0.125	0.132	0.085	0.089	0.058	0.061
224	0.161	0.17	0.125	0.133	0.085	0.089	0.058	0.061
224.2	0.161	0.171	0.125	0.133	0.085	0.089	0.059	0.061
224.4	0.161	0.171	0.126	0.133	0.086	0.089	0.059	0.061
224.6	0.162	0.171	0.126	0.133	0.087	0.089	0.06	0.061
224.8	0.162	0.171	0.126	0.133	0.087	0.089	0.059	0.061
225	0.162	0.171	0.126	0.133	0.087	0.089	0.06	0.062
225.2	0.162	0.171	0.127	0.133	0.088	0.089	0.06	0.062
225.4	0.162	0.171	0.127	0.133	0.087	0.089	0.06	0.062
225.6	0.163	0.171	0.127	0.133	0.087	0.09	0.06	0.062
225.8	0.163	0.171	0.128	0.133	0.087	0.09	0.06	0.062
226	0.163	0.171	0.128	0.133	0.087	0.09	0.06	0.062
226.2	0.163	0.171	0.129	0.133	0.086	0.09	0.06	0.062
226.4	0.163	0.171	0.128	0.133	0.086	0.09	0.06	0.062
226.6	0.163	0.171	0.128	0.133	0.086	0.09	0.06	0.062
226.8	0.162	0.171	0.128	0.133	0.085	0.09	0.06	0.062
227	0.162	0.171	0.127	0.133	0.085	0.09	0.059	0.062
227.2	0.161	0.172	0.126	0.133	0.084	0.09	0.058	0.062
227.4	0.162	0.172	0.126	0.134	0.084	0.09	0.058	0.062
227.6	0.162	0.172	0.126	0.134	0.084	0.09	0.058	0.062
227.8	0.162	0.172	0.127	0.134	0.085	0.09	0.058	0.062
228	0.162	0.172	0.127	0.134	0.085	0.09	0.058	0.062
228.2	0.163	0.172	0.127	0.134	0.085	0.09	0.058	0.062
228.4	0.164	0.172	0.128	0.134	0.086	0.09	0.059	0.062
228.6	0.164	0.172	0.128	0.134	0.086	0.09	0.059	0.062
228.8	0.164	0.172	0.128	0.134	0.086	0.09	0.059	0.062
229	0.164	0.172	0.128	0.134	0.086	0.09	0.06	0.062
229.2	0.164	0.172	0.128	0.134	0.087	0.09	0.06	0.062
229.4	0.165	0.172	0.128	0.134	0.087	0.09	0.061	0.062
229.6	0.165	0.172	0.128	0.134	0.087	0.09	0.061	0.062
229.8	0.165	0.172	0.128	0.134	0.087	0.09	0.061	0.062
230	0.164	0.172	0.128	0.134	0.087	0.09	0.061	0.062
230.2	0.165	0.173	0.128	0.134	0.088	0.091	0.061	0.062
230.4	0.165	0.173	0.128	0.134	0.088	0.091	0.061	0.062
230.6	0.165	0.173	0.129	0.134	0.088	0.091	0.061	0.062
230.8	0.165	0.173	0.129	0.134	0.088	0.091	0.061	0.062
231	0.165	0.173	0.128	0.135	0.088	0.091	0.061	0.062
231.2	0.165	0.173	0.129	0.135	0.088	0.091	0.06	0.062
231.4	0.165	0.173	0.129	0.135	0.087	0.091	0.06	0.063
231.6	0.165	0.173	0.13	0.135	0.087	0.091	0.06	0.063
231.8	0.164	0.173	0.13	0.135	0.088	0.091	0.06	0.063
232	0.164	0.173	0.13	0.135	0.087	0.091	0.06	0.063
232.2	0.165	0.173	0.13	0.135	0.087	0.091	0.06	0.063
232.4	0.165	0.173	0.13	0.135	0.088	0.091	0.06	0.063
232.6	0.164	0.173	0.13	0.135	0.088	0.091	0.06	0.063
232.8	0.165	0.173	0.13	0.135	0.088	0.091	0.06	0.063
233	0.164	0.173	0.13	0.135	0.088	0.091	0.061	0.063
233.2	0.164	0.173	0.129	0.135	0.088	0.091	0.06	0.063
233.4	0.163	0.174	0.129	0.135	0.088	0.091	0.06	0.063
233.6	0.163	0.174	0.129	0.135	0.088	0.091	0.06	0.063
233.8	0.163	0.174	0.129	0.135	0.088	0.091	0.06	0.063
234	0.164	0.174	0.129	0.135	0.088	0.091	0.06	0.063
234.2	0.164	0.174	0.129	0.135	0.089	0.091	0.061	0.063
234.4	0.165	0.174	0.129	0.135	0.089	0.091	0.062	0.063
234.6	0.165	0.174	0.129	0.136	0.089	0.091	0.061	0.063
234.8	0.166	0.174	0.129	0.136	0.089	0.091	0.061	0.063
235	0.166	0.174	0.129	0.136	0.089	0.092	0.061	0.063
235.2	0.166	0.174	0.129	0.136	0.089	0.092	0.061	0.063
235.4	0.166	0.174	0.13	0.136	0.089	0.092	0.061	0.063
235.6	0.166	0.174	0.129	0.136	0.089	0.092	0.061	0.063
235.8	0.166	0.174	0.129	0.136	0.089	0.092	0.061	0.063
236	0.166	0.174	0.13	0.136	0.089	0.092	0.061	0.063
236.2	0.167	0.174	0.13	0.136	0.09	0.092	0.061	0.063
236.4	0.167	0.175	0.13	0.136	0.09	0.092	0.061	0.063
236.6	0.167	0.175	0.13	0.136	0.09	0.092	0.061	0.063
236.8	0.166	0.175	0.13	0.136	0.09	0.092	0.06	0.063
237	0.166	0.175	0.13	0.136	0.089	0.092	0.06	0.063
237.2	0.166	0.175	0.13	0.136	0.089	0.092	0.06	0.063
237.4	0.166	0.175	0.13	0.136	0.089	0.092	0.06	0.063
237.6	0.166	0.175	0.13	0.136	0.089	0.092	0.06	0.063
237.8	0.166	0.175	0.13	0.136	0.089	0.092	0.061	0.064
238	0.166	0.175	0.13	0.136	0.088	0.092	0.06	0.064
238.2	0.167	0.175	0.13	0.136	0.088	0.092	0.061	0.064
238.4	0.167	0.175	0.13	0.137	0.088	0.092	0.061	0.064
238.6	0.167	0.175	0.129	0.137	0.088	0.092	0.061	0.064
238.8	0.167	0.175	0.13	0.137	0.088	0.092	0.061	0.064
239	0.167	0.175	0.13	0.137	0.088	0.092	0.061	0.064
239.2	0.166	0.175	0.13	0.137	0.089	0.092	0.061	0.064
239.4	0.166	0.175	0.13	0.137	0.089	0.092	0.061	0.064
239.6	0.166	0.176	0.13	0.137	0.089	0.092	0.061	0.064
239.8	0.167	0.176	0.131	0.137	0.089	0.092	0.061	0.064
240	0.166	0.176	0.13	0.137	0.089	0.093	0.061	0.064
240.2	0.167	0.176	0.131	0.137	0.089	0.093	0.061	0.064
240.4	0.166	0.176	0.13	0.137	0.089	0.093	0.061	0.064
240.6	0.166	0.176	0.13	0.137	0.089	0.093	0.061	0.064
240.8	0.166	0.176	0.13	0.137	0.089	0.093	0.062	0.064
241	0.167	0.176	0.13	0.137	0.089	0.093	0.062	0.064
241.2	0.167	0.176	0.13	0.137	0.089	0.093	0.062	0.064
241.4	0.167	0.176	0.13	0.137	0.089	0.093	0.062	0.064
241.6	0.167	0.176	0.13	0.137	0.089	0.093	0.062	0.064
241.8	0.168	0.176	0.13	0.137	0.089	0.093	0.062	0.064
242	0.168	0.176	0.13	0.138	0.089	0.093	0.062	0.064
242.2	0.168	0.176	0.13	0.138	0.09	0.093	0.062	0.064
242.4	0.168	0.176	0.13	0.138	0.089	0.093	0.062	0.064
242.6	0.167	0.176	0.131	0.138	0.089	0.093	0.061	0.064
242.8	0.168	0.176	0.131	0.138	0.09	0.093	0.061	0.064
243	0.168	0.177	0.132	0.138	0.09	0.093	0.061	0.064
243.2	0.168	0.177	0.132	0.138	0.09	0.093	0.061	0.064
243.4	0.168	0.177	0.133	0.138	0.09	0.093	0.061	0.064
243.6	0.168	0.177	0.133	0.138	0.09	0.093	0.061	0.064
243.8	0.168	0.177	0.132	0.138	0.091	0.093	0.061	0.064
244	0.168	0.177	0.132	0.138	0.091	0.093	0.061	0.064
244.2	0.168	0.177	0.132	0.138	0.091	0.093	0.062	0.064
244.4	0.168	0.177	0.133	0.138	0.091	0.093	0.062	0.064
244.6	0.169	0.177	0.133	0.138	0.091	0.093	0.062	0.065
244.8	0.169	0.177	0.133	0.138	0.091	0.093	0.063	0.065
245	0.17	0.177	0.133	0.138	0.092	0.093	0.064	0.065
245.2	0.17	0.177	0.133	0.138	0.092	0.094	0.064	0.065
245.4	0.17	0.177	0.133	0.138	0.092	0.094	0.064	0.065
245.6	0.171	0.177	0.133	0.138	0.092	0.094	0.064	0.065
245.8	0.17	0.177	0.133	0.138	0.093	0.094	0.065	0.065
246	0.17	0.177	0.133	0.139	0.092	0.094	0.064	0.065
246.2	0.17	0.177	0.133	0.139	0.093	0.094	0.064	0.065
246.4	0.17	0.178	0.133	0.139	0.092	0.094	0.064	0.065
246.6	0.17	0.178	0.133	0.139	0.092	0.094	0.064	0.065
246.8	0.171	0.178	0.133	0.139	0.092	0.094	0.064	0.065
247	0.17	0.178	0.133	0.139	0.091	0.094	0.063	0.065
247.2	0.17	0.178	0.133	0.139	0.09	0.094	0.063	0.065
247.4	0.169	0.178	0.132	0.139	0.09	0.094	0.063	0.065
247.6	0.169	0.178	0.132	0.139	0.091	0.094	0.063	0.065
247.8	0.168	0.178	0.131	0.139	0.09	0.094	0.062	0.065
248	0.168	0.178	0.131	0.139	0.089	0.094	0.062	0.065
248.2	0.168	0.178	0.131	0.139	0.089	0.094	0.062	0.065
248.4	0.168	0.178	0.131	0.139	0.089	0.094	0.062	0.065
248.6	0.168	0.178	0.131	0.139	0.089	0.094	0.062	0.065
248.8	0.168	0.178	0.131	0.139	0.089	0.094	0.062	0.065
249	0.169	0.178	0.131	0.139	0.09	0.094	0.063	0.065
249.2	0.169	0.178	0.131	0.139	0.09	0.094	0.063	0.065
249.4	0.169	0.178	0.132	0.139	0.09	0.094	0.063	0.065
249.6	0.17	0.178	0.132	0.139	0.091	0.094	0.063	0.065
249.8	0.169	0.179	0.132	0.14	0.091	0.094	0.063	0.065
250	0.17	0.179	0.131	0.14	0.091	0.094	0.062	0.065
250.2	0.17	0.179	0.131	0.14	0.092	0.094	0.062	0.065
250.4	0.171	0.179	0.132	0.14	0.092	0.095	0.063	0.065
250.6	0.171	0.179	0.132	0.14	0.092	0.095	0.064	0.065
250.8	0.171	0.179	0.133	0.14	0.092	0.095	0.064	0.065
251	0.171	0.179	0.133	0.14	0.092	0.095	0.064	0.065
251.2	0.171	0.179	0.133	0.14	0.091	0.095	0.064	0.065
251.4	0.17	0.179	0.133	0.14	0.091	0.095	0.064	0.066
251.6	0.17	0.179	0.133	0.14	0.091	0.095	0.064	0.066
251.8	0.171	0.179	0.133	0.14	0.091	0.095	0.064	0.066
252	0.171	0.179	0.134	0.14	0.092	0.095	0.064	0.066
252.2	0.171	0.179	0.134	0.14	0.092	0.095	0.064	0.066
252.4	0.171	0.179	0.134	0.14	0.092	0.095	0.064	0.066
252.6	0.171	0.179	0.134	0.14	0.092	0.095	0.063	0.066
252.8	0.171	0.179	0.134	0.14	0.092	0.095	0.064	0.066
253	0.171	0.179	0.134	0.14	0.093	0.095	0.064	0.066
253.2	0.171	0.179	0.134	0.14	0.092	0.095	0.063	0.066
253.4	0.171	0.18	0.134	0.14	0.092	0.095	0.063	0.066
253.6	0.17	0.18	0.134	0.14	0.091	0.095	0.063	0.066
253.8	0.17	0.18	0.133	0.14	0.091	0.095	0.063	0.066
254	0.169	0.18	0.133	0.141	0.091	0.095	0.062	0.066
254.2	0.169	0.18	0.133	0.141	0.09	0.095	0.063	0.066
254.4	0.169	0.18	0.133	0.141	0.09	0.095	0.063	0.066
254.6	0.169	0.18	0.132	0.141	0.09	0.095	0.063	0.066
254.8	0.169	0.18	0.133	0.141	0.09	0.095	0.063	0.066
255	0.169	0.18	0.132	0.141	0.09	0.095	0.063	0.066
255.2	0.169	0.18	0.133	0.141	0.09	0.095	0.063	0.066
255.4	0.17	0.18	0.132	0.141	0.091	0.095	0.063	0.066
255.6	0.171	0.18	0.132	0.141	0.09	0.095	0.063	0.066
255.8	0.171	0.18	0.133	0.141	0.091	0.096	0.063	0.066
256	0.171	0.18	0.133	0.141	0.091	0.096	0.063	0.066
256.2	0.172	0.18	0.133	0.141	0.091	0.096	0.063	0.066
256.4	0.172	0.18	0.133	0.141	0.092	0.096	0.063	0.066
256.6	0.172	0.18	0.134	0.141	0.093	0.096	0.063	0.066
256.8	0.172	0.18	0.134	0.141	0.093	0.096	0.064	0.066
257	0.173	0.181	0.135	0.141	0.093	0.096	0.064	0.066
257.2	0.172	0.181	0.135	0.141	0.093	0.096	0.064	0.066
257.4	0.173	0.181	0.135	0.141	0.093	0.096	0.064	0.066
257.6	0.173	0.181	0.135	0.141	0.093	0.096	0.064	0.066
257.8	0.172	0.181	0.134	0.141	0.093	0.096	0.064	0.066
258	0.173	0.181	0.134	0.142	0.092	0.096	0.064	0.066
258.2	0.173	0.181	0.135	0.142	0.092	0.096	0.064	0.066
258.4	0.173	0.181	0.135	0.142	0.092	0.096	0.064	0.066
258.6	0.174	0.181	0.135	0.142	0.092	0.096	0.065	0.067
258.8	0.174	0.181	0.136	0.142	0.092	0.096	0.065	0.067
259	0.174	0.181	0.136	0.142	0.092	0.096	0.065	0.067
259.2	0.174	0.181	0.136	0.142	0.092	0.096	0.065	0.067
259.4	0.174	0.181	0.136	0.142	0.092	0.096	0.065	0.067
259.6	0.174	0.181	0.136	0.142	0.092	0.096	0.065	0.067
259.8	0.173	0.181	0.136	0.142	0.092	0.096	0.065	0.067
260	0.174	0.181	0.136	0.142	0.092	0.096	0.065	0.067
260.2	0.173	0.181	0.137	0.142	0.092	0.096	0.066	0.067
260.4	0.173	0.181	0.137	0.142	0.093	0.096	0.066	0.067
260.6	0.173	0.182	0.137	0.142	0.093	0.096	0.066	0.067
260.8	0.173	0.182	0.137	0.142	0.094	0.096	0.066	0.067
261	0.173	0.182	0.137	0.142	0.093	0.096	0.066	0.067
261.2	0.173	0.182	0.137	0.142	0.093	0.097	0.065	0.067
261.4	0.173	0.182	0.138	0.142	0.094	0.097	0.065	0.067
261.6	0.173	0.182	0.137	0.142	0.093	0.097	0.064	0.067
261.8	0.173	0.182	0.137	0.142	0.093	0.097	0.064	0.067
262	0.174	0.182	0.137	0.142	0.093	0.097	0.064	0.067
262.2	0.174	0.182	0.138	0.143	0.093	0.097	0.065	0.067
262.4	0.174	0.182	0.138	0.143	0.093	0.097	0.065	0.067
262.6	0.174	0.182	0.138	0.143	0.093	0.097	0.066	0.067
262.8	0.174	0.182	0.138	0.143	0.093	0.097	0.065	0.067
263	0.174	0.182	0.138	0.143	0.093	0.097	0.065	0.067
263.2	0.174	0.182	0.137	0.143	0.093	0.097	0.065	0.067
263.4	0.174	0.182	0.137	0.143	0.093	0.097	0.064	0.067
263.6	0.174	0.182	0.136	0.143	0.094	0.097	0.064	0.067
263.8	0.174	0.182	0.136	0.143	0.093	0.097	0.064	0.067
264	0.174	0.182	0.137	0.143	0.094	0.097	0.064	0.067
264.2	0.174	0.182	0.137	0.143	0.094	0.097	0.064	0.067
264.4	0.174	0.183	0.136	0.143	0.094	0.097	0.064	0.067
264.6	0.174	0.183	0.136	0.143	0.094	0.097	0.064	0.067
264.8	0.174	0.183	0.136	0.143	0.094	0.097	0.064	0.067
265	0.174	0.183	0.136	0.143	0.093	0.097	0.063	0.067
265.2	0.174	0.183	0.136	0.143	0.093	0.097	0.063	0.067
265.4	0.174	0.183	0.136	0.143	0.093	0.097	0.063	0.067
265.6	0.174	0.183	0.136	0.143	0.093	0.097	0.063	0.067
265.8	0.175	0.183	0.136	0.143	0.093	0.097	0.063	0.067
266	0.175	0.183	0.137	0.143	0.094	0.097	0.064	0.068
266.2	0.175	0.183	0.138	0.143	0.094	0.097	0.065	0.068
266.4	0.175	0.183	0.138	0.143	0.094	0.097	0.065	0.068
266.6	0.175	0.183	0.138	0.144	0.095	0.097	0.066	0.068
266.8	0.176	0.183	0.138	0.144	0.095	0.098	0.066	0.068
267	0.176	0.183	0.138	0.144	0.095	0.098	0.066	0.068
267.2	0.176	0.183	0.138	0.144	0.095	0.098	0.066	0.068
267.4	0.177	0.183	0.138	0.144	0.095	0.098	0.066	0.068
267.6	0.177	0.183	0.138	0.144	0.096	0.098	0.066	0.068
267.8	0.177	0.183	0.138	0.144	0.095	0.098	0.066	0.068
268	0.177	0.183	0.139	0.144	0.096	0.098	0.066	0.068
268.2	0.177	0.184	0.139	0.144	0.096	0.098	0.067	0.068
268.4	0.177	0.184	0.138	0.144	0.095	0.098	0.066	0.068
268.6	0.176	0.184	0.138	0.144	0.095	0.098	0.066	0.068
268.8	0.176	0.184	0.138	0.144	0.095	0.098	0.066	0.068
269	0.176	0.184	0.137	0.144	0.095	0.098	0.065	0.068
269.2	0.176	0.184	0.137	0.144	0.094	0.098	0.065	0.068
269.4	0.176	0.184	0.137	0.144	0.094	0.098	0.065	0.068
269.6	0.176	0.184	0.137	0.144	0.094	0.098	0.065	0.068
269.8	0.176	0.184	0.137	0.144	0.094	0.098	0.065	0.068
270	0.176	0.184	0.137	0.144	0.094	0.098	0.065	0.068
270.2	0.176	0.184	0.137	0.144	0.094	0.098	0.065	0.068
270.4	0.176	0.184	0.137	0.144	0.094	0.098	0.065	0.068
270.6	0.177	0.184	0.138	0.144	0.094	0.098	0.065	0.068
270.8	0.176	0.184	0.138	0.144	0.093	0.098	0.065	0.068
271	0.176	0.184	0.138	0.145	0.094	0.098	0.065	0.068
271.2	0.176	0.184	0.138	0.145	0.093	0.098	0.065	0.068
271.4	0.176	0.184	0.138	0.145	0.094	0.098	0.065	0.068
271.6	0.176	0.184	0.138	0.145	0.094	0.098	0.065	0.068
271.8	0.176	0.184	0.138	0.145	0.094	0.098	0.065	0.068
272	0.175	0.184	0.138	0.145	0.094	0.098	0.065	0.068
272.2	0.175	0.185	0.138	0.145	0.094	0.098	0.065	0.068
272.4	0.175	0.185	0.138	0.145	0.094	0.098	0.065	0.068
272.6	0.175	0.185	0.138	0.145	0.095	0.099	0.065	0.068
272.8	0.175	0.185	0.139	0.145	0.095	0.099	0.065	0.068
273	0.176	0.185	0.139	0.145	0.095	0.099	0.065	0.068
273.2	0.176	0.185	0.139	0.145	0.095	0.099	0.066	0.068
273.4	0.176	0.185	0.139	0.145	0.095	0.099	0.066	0.068
273.6	0.177	0.185	0.139	0.145	0.095	0.099	0.066	0.069
273.8	0.178	0.185	0.139	0.145	0.095	0.099	0.067	0.069
274	0.178	0.185	0.14	0.145	0.096	0.099	0.067	0.069
274.2	0.179	0.185	0.14	0.145	0.097	0.099	0.068	0.069
274.4	0.179	0.185	0.14	0.145	0.097	0.099	0.069	0.069
274.6	0.179	0.185	0.14	0.145	0.097	0.099	0.068	0.069
274.8	0.178	0.185	0.14	0.145	0.096	0.099	0.068	0.069
275	0.179	0.185	0.141	0.145	0.096	0.099	0.068	0.069
275.2	0.178	0.185	0.14	0.145	0.096	0.099	0.068	0.069
275.4	0.178	0.185	0.141	0.145	0.097	0.099	0.068	0.069
275.6	0.178	0.185	0.14	0.146	0.097	0.099	0.068	0.069
275.8	0.178	0.185	0.141	0.146	0.096	0.099	0.067	0.069
276	0.178	0.185	0.14	0.146	0.096	0.099	0.068	0.069
276.2	0.177	0.186	0.14	0.146	0.096	0.099	0.067	0.069
276.4	0.177	0.186	0.14	0.146	0.096	0.099	0.067	0.069
276.6	0.177	0.186	0.141	0.146	0.096	0.099	0.067	0.069
276.8	0.177	0.186	0.141	0.146	0.095	0.099	0.066	0.069
277	0.177	0.186	0.141	0.146	0.095	0.099	0.066	0.069
277.2	0.177	0.186	0.14	0.146	0.095	0.099	0.066	0.069
277.4	0.177	0.186	0.14	0.146	0.095	0.099	0.066	0.069
277.6	0.177	0.186	0.14	0.146	0.095	0.099	0.066	0.069
277.8	0.177	0.186	0.14	0.146	0.095	0.099	0.066	0.069
278	0.178	0.186	0.14	0.146	0.096	0.099	0.066	0.069
278.2	0.178	0.186	0.14	0.146	0.096	0.099	0.067	0.069
278.4	0.178	0.186	0.14	0.146	0.096	0.099	0.067	0.069
278.6	0.178	0.186	0.14	0.146	0.096	0.1	0.066	0.069
278.8	0.178	0.186	0.14	0.146	0.096	0.1	0.067	0.069
279	0.178	0.186	0.141	0.146	0.097	0.1	0.067	0.069
279.2	0.179	0.186	0.14	0.146	0.097	0.1	0.067	0.069
279.4	0.179	0.186	0.141	0.146	0.098	0.1	0.067	0.069
279.6	0.179	0.186	0.141	0.146	0.098	0.1	0.068	0.069
279.8	0.179	0.186	0.141	0.146	0.098	0.1	0.068	0.069
280	0.179	0.186	0.141	0.146	0.098	0.1	0.068	0.069
280.2	0.179	0.186	0.141	0.147	0.098	0.1	0.068	0.069
280.4	0.179	0.187	0.141	0.147	0.098	0.1	0.068	0.069
280.6	0.178	0.187	0.141	0.147	0.098	0.1	0.068	0.069
280.8	0.178	0.187	0.141	0.147	0.097	0.1	0.067	0.069
281	0.178	0.187	0.141	0.147	0.097	0.1	0.067	0.069
281.2	0.178	0.187	0.141	0.147	0.097	0.1	0.066	0.069
281.4	0.179	0.187	0.141	0.147	0.097	0.1	0.066	0.069
281.6	0.178	0.187	0.141	0.147	0.096	0.1	0.066	0.07
281.8	0.178	0.187	0.141	0.147	0.096	0.1	0.066	0.07
282	0.178	0.187	0.141	0.147	0.096	0.1	0.066	0.07
282.2	0.178	0.187	0.141	0.147	0.096	0.1	0.066	0.07
282.4	0.179	0.187	0.141	0.147	0.095	0.1	0.066	0.07
282.6	0.179	0.187	0.141	0.147	0.095	0.1	0.066	0.07
282.8	0.179	0.187	0.141	0.147	0.096	0.1	0.066	0.07
283	0.179	0.187	0.141	0.147	0.096	0.1	0.067	0.07
283.2	0.179	0.187	0.141	0.147	0.096	0.1	0.067	0.07
283.4	0.179	0.187	0.142	0.147	0.096	0.1	0.067	0.07
283.6	0.179	0.187	0.141	0.147	0.097	0.1	0.068	0.07
283.8	0.179	0.187	0.141	0.147	0.097	0.1	0.068	0.07
284	0.179	0.187	0.141	0.147	0.096	0.1	0.067	0.07
284.2	0.179	0.187	0.141	0.147	0.097	0.1	0.067	0.07
284.4	0.179	0.187	0.141	0.147	0.097	0.1	0.067	0.07
284.6	0.179	0.187	0.14	0.147	0.097	0.1	0.067	0.07
284.8	0.179	0.188	0.141	0.147	0.097	0.101	0.066	0.07
285	0.179	0.188	0.141	0.147	0.097	0.101	0.066	0.07
285.2	0.179	0.188	0.14	0.148	0.097	0.101	0.066	0.07
285.4	0.179	0.188	0.14	0.148	0.097	0.101	0.066	0.07
285.6	0.179	0.188	0.14	0.148	0.097	0.101	0.066	0.07
285.8	0.179	0.188	0.14	0.148	0.097	0.101	0.065	0.07
286	0.179	0.188	0.141	0.148	0.097	0.101	0.065	0.07
286.2	0.179	0.188	0.141	0.148	0.097	0.101	0.066	0.07
286.4	0.179	0.188	0.141	0.148	0.097	0.101	0.067	0.07
286.6	0.179	0.188	0.141	0.148	0.097	0.101	0.067	0.07
286.8	0.178	0.188	0.141	0.148	0.097	0.101	0.067	0.07
287	0.178	0.188	0.141	0.148	0.098	0.101	0.068	0.07
287.2	0.178	0.188	0.141	0.148	0.097	0.101	0.068	0.07
287.4	0.178	0.188	0.142	0.148	0.097	0.101	0.068	0.07
287.6	0.178	0.188	0.141	0.148	0.097	0.101	0.068	0.07
287.8	0.178	0.188	0.141	0.148	0.097	0.101	0.068	0.07
288	0.177	0.188	0.141	0.148	0.097	0.101	0.068	0.07
288.2	0.177	0.188	0.141	0.148	0.097	0.101	0.068	0.07
288.4	0.178	0.188	0.141	0.148	0.098	0.101	0.068	0.07
288.6	0.178	0.188	0.141	0.148	0.098	0.101	0.068	0.07
288.8	0.178	0.188	0.141	0.148	0.097	0.101	0.068	0.07
289	0.178	0.188	0.141	0.148	0.097	0.101	0.067	0.07
289.2	0.179	0.189	0.141	0.148	0.097	0.101	0.067	0.07
289.4	0.179	0.189	0.142	0.148	0.097	0.101	0.067	0.07
289.6	0.179	0.189	0.142	0.148	0.097	0.101	0.067	0.07
289.8	0.179	0.189	0.142	0.148	0.097	0.101	0.067	0.071
290	0.18	0.189	0.143	0.149	0.097	0.101	0.067	0.071
290.2	0.18	0.189	0.143	0.149	0.097	0.101	0.067	0.071
290.4	0.18	0.189	0.143	0.149	0.097	0.101	0.067	0.071
290.6	0.18	0.189	0.143	0.149	0.096	0.101	0.067	0.071
290.8	0.18	0.189	0.144	0.149	0.097	0.101	0.067	0.071
291	0.18	0.189	0.144	0.149	0.096	0.101	0.067	0.071
291.2	0.18	0.189	0.144	0.149	0.096	0.102	0.068	0.071
291.4	0.18	0.189	0.143	0.149	0.096	0.102	0.067	0.071
291.6	0.179	0.189	0.143	0.149	0.096	0.102	0.067	0.071
291.8	0.18	0.189	0.143	0.149	0.096	0.102	0.067	0.071
292	0.18	0.189	0.143	0.149	0.097	0.102	0.068	0.071
292.2	0.18	0.189	0.142	0.149	0.097	0.102	0.068	0.071
292.4	0.18	0.189	0.142	0.149	0.097	0.102	0.068	0.071
292.6	0.18	0.189	0.141	0.149	0.097	0.102	0.068	0.071
292.8	0.18	0.189	0.141	0.149	0.097	0.102	0.067	0.071
293	0.181	0.189	0.141	0.149	0.097	0.102	0.068	0.071
293.2	0.181	0.189	0.141	0.149	0.097	0.102	0.068	0.071
293.4	0.181	0.189	0.141	0.149	0.097	0.102	0.067	0.071
293.6	0.181	0.189	0.141	0.149	0.097	0.102	0.068	0.071
293.8	0.181	0.19	0.142	0.149	0.097	0.102	0.068	0.071
294	0.181	0.19	0.143	0.149	0.097	0.102	0.068	0.071
294.2	0.181	0.19	0.143	0.149	0.098	0.102	0.068	0.071
294.4	0.181	0.19	0.143	0.149	0.098	0.102	0.068	0.071
294.6	0.181	0.19	0.143	0.149	0.098	0.102	0.068	0.071
294.8	0.181	0.19	0.144	0.149	0.099	0.102	0.068	0.071
295	0.181	0.19	0.144	0.149	0.098	0.102	0.068	0.071
295.2	0.181	0.19	0.144	0.15	0.098	0.102	0.068	0.071
295.4	0.181	0.19	0.144	0.15	0.098	0.102	0.068	0.071
295.6	0.182	0.19	0.144	0.15	0.099	0.102	0.069	0.071
295.8	0.182	0.19	0.145	0.15	0.099	0.102	0.069	0.071
296	0.183	0.19	0.145	0.15	0.1	0.102	0.069	0.071
296.2	0.182	0.19	0.145	0.15	0.099	0.102	0.068	0.071
296.4	0.182	0.19	0.145	0.15	0.099	0.102	0.068	0.071
296.6	0.182	0.19	0.144	0.15	0.099	0.102	0.068	0.071
296.8	0.183	0.19	0.144	0.15	0.099	0.102	0.068	0.071
297	0.183	0.19	0.144	0.15	0.099	0.102	0.068	0.071
297.2	0.183	0.19	0.143	0.15	0.099	0.102	0.068	0.071
297.4	0.183	0.19	0.143	0.15	0.099	0.102	0.068	0.071
297.6	0.183	0.19	0.143	0.15	0.099	0.102	0.069	0.071
297.8	0.182	0.19	0.143	0.15	0.099	0.103	0.068	0.071
298	0.182	0.19	0.143	0.15	0.099	0.103	0.068	0.071
298.2	0.182	0.19	0.143	0.15	0.099	0.103	0.068	0.072
298.4	0.182	0.191	0.142	0.15	0.099	0.103	0.068	0.072
298.6	0.182	0.191	0.142	0.15	0.099	0.103	0.068	0.072
298.8	0.182	0.191	0.142	0.15	0.1	0.103	0.069	0.072
299	0.182	0.191	0.143	0.15	0.1	0.103	0.069	0.072
299.2	0.183	0.191	0.143	0.15	0.1	0.103	0.069	0.072
299.4	0.184	0.191	0.144	0.15	0.101	0.103	0.07	0.072
299.6	0.185	0.191	0.145	0.15	0.101	0.103	0.07	0.072
299.8	0.185	0.191	0.145	0.15	0.101	0.103	0.07	0.072
300	0.185	0.191	0.145	0.15	0.102	0.103	0.07	0.072
300.2	0.185	0.191	0.146	0.15	0.102	0.103	0.071	0.072
300.4	0.186	0.191	0.146	0.151	0.102	0.103	0.071	0.072
300.6	0.186	0.191	0.146	0.151	0.102	0.103	0.071	0.072
300.8	0.186	0.191	0.146	0.151	0.102	0.103	0.071	0.072
301	0.186	0.191	0.146	0.151	0.102	0.103	0.071	0.072
301.2	0.187	0.191	0.146	0.151	0.102	0.103	0.071	0.072
301.4	0.186	0.191	0.146	0.151	0.103	0.103	0.071	0.072
301.6	0.186	0.191	0.146	0.151	0.102	0.103	0.071	0.072
301.8	0.185	0.191	0.146	0.151	0.102	0.103	0.071	0.072
302	0.185	0.191	0.146	0.151	0.102	0.103	0.07	0.072
302.2	0.184	0.191	0.145	0.151	0.101	0.103	0.07	0.072
302.4	0.183	0.191	0.145	0.151	0.101	0.103	0.07	0.072
302.6	0.183	0.191	0.145	0.151	0.101	0.103	0.07	0.072
302.8	0.183	0.191	0.145	0.151	0.101	0.103	0.07	0.072
303	0.183	0.191	0.145	0.151	0.1	0.103	0.07	0.072
303.2	0.183	0.192	0.146	0.151	0.1	0.103	0.07	0.072
303.4	0.183	0.192	0.146	0.151	0.1	0.103	0.069	0.072
303.6	0.183	0.192	0.145	0.151	0.1	0.103	0.069	0.072
303.8	0.183	0.192	0.145	0.151	0.099	0.103	0.069	0.072
304	0.183	0.192	0.146	0.151	0.1	0.103	0.069	0.072
304.2	0.183	0.192	0.145	0.151	0.1	0.103	0.069	0.072
304.4	0.183	0.192	0.145	0.151	0.099	0.103	0.069	0.072
304.6	0.183	0.192	0.145	0.151	0.099	0.104	0.069	0.072
304.8	0.184	0.192	0.145	0.151	0.099	0.104	0.069	0.072
305	0.184	0.192	0.145	0.151	0.1	0.104	0.07	0.072
305.2	0.184	0.192	0.145	0.151	0.1	0.104	0.07	0.072
305.4	0.183	0.192	0.144	0.151	0.1	0.104	0.069	0.072
305.6	0.183	0.192	0.144	0.151	0.1	0.104	0.069	0.072
305.8	0.183	0.192	0.144	0.152	0.1	0.104	0.069	0.072
306	0.183	0.192	0.144	0.152	0.1	0.104	0.069	0.072
306.2	0.184	0.192	0.144	0.152	0.1	0.104	0.069	0.072
306.4	0.184	0.192	0.144	0.152	0.1	0.104	0.069	0.072
306.6	0.184	0.192	0.145	0.152	0.1	0.104	0.07	0.072
306.8	0.184	0.192	0.145	0.152	0.1	0.104	0.069	0.072
307	0.184	0.192	0.145	0.152	0.1	0.104	0.069	0.073
307.2	0.185	0.192	0.146	0.152	0.1	0.104	0.069	0.073
307.4	0.185	0.192	0.146	0.152	0.1	0.104	0.069	0.073
307.6	0.185	0.192	0.146	0.152	0.101	0.104	0.07	0.073
307.8	0.185	0.192	0.146	0.152	0.1	0.104	0.07	0.073
308	0.185	0.192	0.147	0.152	0.101	0.104	0.07	0.073
308.2	0.185	0.193	0.147	0.152	0.101	0.104	0.07	0.073
308.4	0.185	0.193	0.147	0.152	0.101	0.104	0.07	0.073
308.6	0.185	0.193	0.148	0.152	0.101	0.104	0.07	0.073
308.8	0.185	0.193	0.148	0.152	0.101	0.104	0.07	0.073
309	0.185	0.193	0.148	0.152	0.101	0.104	0.071	0.073
309.2	0.184	0.193	0.147	0.152	0.101	0.104	0.071	0.073
309.4	0.184	0.193	0.148	0.152	0.101	0.104	0.07	0.073
309.6	0.185	0.193	0.148	0.152	0.101	0.104	0.071	0.073
309.8	0.186	0.193	0.148	0.152	0.101	0.104	0.071	0.073
310	0.186	0.193	0.148	0.152	0.102	0.104	0.071	0.073
310.2	0.186	0.193	0.148	0.152	0.101	0.104	0.071	0.073
310.4	0.186	0.193	0.148	0.152	0.101	0.104	0.071	0.073
310.6	0.186	0.193	0.148	0.152	0.101	0.104	0.071	0.073
310.8	0.186	0.193	0.148	0.152	0.102	0.104	0.071	0.073
311	0.187	0.193	0.148	0.152	0.102	0.104	0.071	0.073
311.2	0.188	0.193	0.148	0.152	0.102	0.104	0.071	0.073
311.4	0.187	0.193	0.147	0.153	0.102	0.104	0.071	0.073
311.6	0.187	0.193	0.147	0.153	0.102	0.104	0.071	0.073
311.8	0.187	0.193	0.147	0.153	0.102	0.105	0.071	0.073
312	0.186	0.193	0.146	0.153	0.102	0.105	0.071	0.073
312.2	0.186	0.193	0.146	0.153	0.102	0.105	0.071	0.073
312.4	0.186	0.193	0.146	0.153	0.102	0.105	0.07	0.073
312.6	0.186	0.193	0.146	0.153	0.102	0.105	0.07	0.073
312.8	0.186	0.193	0.146	0.153	0.102	0.105	0.07	0.073
313	0.187	0.193	0.146	0.153	0.102	0.105	0.07	0.073
313.2	0.186	0.193	0.146	0.153	0.101	0.105	0.07	0.073
313.4	0.187	0.194	0.147	0.153	0.101	0.105	0.07	0.073
313.6	0.187	0.194	0.147	0.153	0.102	0.105	0.07	0.073
313.8	0.187	0.194	0.147	0.153	0.102	0.105	0.07	0.073
314	0.187	0.194	0.147	0.153	0.102	0.105	0.07	0.073
314.2	0.187	0.194	0.146	0.153	0.102	0.105	0.07	0.073
314.4	0.187	0.194	0.146	0.153	0.102	0.105	0.07	0.073
314.6	0.187	0.194	0.147	0.153	0.102	0.105	0.07	0.073
314.8	0.186	0.194	0.147	0.153	0.102	0.105	0.07	0.073
315	0.186	0.194	0.147	0.153	0.102	0.105	0.07	0.073
315.2	0.186	0.194	0.147	0.153	0.102	0.105	0.07	0.073
315.4	0.186	0.194	0.146	0.153	0.101	0.105	0.07	0.073
315.6	0.185	0.194	0.146	0.153	0.101	0.105	0.069	0.073
315.8	0.185	0.194	0.146	0.153	0.101	0.105	0.069	0.073
316	0.185	0.194	0.146	0.153	0.101	0.105	0.069	0.073
316.2	0.185	0.194	0.147	0.153	0.101	0.105	0.069	0.074
316.4	0.186	0.194	0.147	0.153	0.101	0.105	0.07	0.074
316.6	0.186	0.194	0.147	0.153	0.101	0.105	0.07	0.074
316.8	0.187	0.194	0.148	0.153	0.102	0.105	0.07	0.074
317	0.187	0.194	0.148	0.153	0.102	0.105	0.071	0.074
317.2	0.188	0.194	0.148	0.154	0.102	0.105	0.071	0.074
317.4	0.188	0.194	0.148	0.154	0.102	0.105	0.072	0.074
317.6	0.188	0.194	0.148	0.154	0.103	0.105	0.072	0.074
317.8	0.189	0.194	0.148	0.154	0.103	0.105	0.072	0.074
318	0.188	0.194	0.148	0.154	0.103	0.105	0.072	0.074
318.2	0.189	0.194	0.148	0.154	0.103	0.105	0.072	0.074
318.4	0.189	0.194	0.148	0.154	0.103	0.105	0.073	0.074
318.6	0.189	0.194	0.148	0.154	0.102	0.105	0.073	0.074
318.8	0.189	0.195	0.148	0.154	0.102	0.105	0.073	0.074
319	0.189	0.195	0.147	0.154	0.102	0.106	0.072	0.074
319.2	0.189	0.195	0.148	0.154	0.102	0.106	0.072	0.074
319.4	0.188	0.195	0.148	0.154	0.102	0.106	0.072	0.074
319.6	0.188	0.195	0.148	0.154	0.101	0.106	0.071	0.074
319.8	0.188	0.195	0.148	0.154	0.102	0.106	0.072	0.074
320	0.188	0.195	0.148	0.154	0.101	0.106	0.071	0.074
320.2	0.188	0.195	0.148	0.154	0.101	0.106	0.071	0.074
320.4	0.188	0.195	0.149	0.154	0.101	0.106	0.071	0.074
320.6	0.188	0.195	0.149	0.154	0.102	0.106	0.071	0.074
320.8	0.187	0.195	0.149	0.154	0.101	0.106	0.071	0.074
321	0.188	0.195	0.149	0.154	0.102	0.106	0.071	0.074
321.2	0.188	0.195	0.149	0.154	0.102	0.106	0.071	0.074
321.4	0.188	0.195	0.15	0.154	0.102	0.106	0.071	0.074
321.6	0.189	0.195	0.15	0.154	0.103	0.106	0.072	0.074
321.8	0.189	0.195	0.15	0.154	0.103	0.106	0.071	0.074
322	0.189	0.195	0.15	0.154	0.102	0.106	0.072	0.074
322.2	0.19	0.195	0.15	0.154	0.102	0.106	0.072	0.074
322.4	0.189	0.195	0.149	0.154	0.102	0.106	0.071	0.074
322.6	0.19	0.195	0.149	0.154	0.102	0.106	0.071	0.074
322.8	0.19	0.195	0.149	0.154	0.102	0.106	0.071	0.074
323	0.19	0.195	0.149	0.154	0.102	0.106	0.071	0.074
323.2	0.19	0.195	0.15	0.155	0.103	0.106	0.072	0.074
323.4	0.189	0.195	0.15	0.155	0.102	0.106	0.072	0.074
323.6	0.189	0.195	0.15	0.155	0.103	0.106	0.072	0.074
323.8	0.189	0.195	0.15	0.155	0.103	0.106	0.072	0.074
324	0.188	0.195	0.149	0.155	0.103	0.106	0.072	0.074
324.2	0.188	0.196	0.149	0.155	0.103	0.106	0.072	0.074
324.4	0.188	0.196	0.149	0.155	0.103	0.106	0.072	0.074
324.6	0.187	0.196	0.149	0.155	0.103	0.106	0.072	0.074
324.8	0.187	0.196	0.149	0.155	0.103	0.106	0.072	0.074
325	0.188	0.196	0.149	0.155	0.104	0.106	0.072	0.074
325.2	0.188	0.196	0.148	0.155	0.104	0.106	0.072	0.074
325.4	0.188	0.196	0.149	0.155	0.104	0.106	0.072	0.074
325.6	0.189	0.196	0.149	0.155	0.104	0.106	0.073	0.074
325.8	0.188	0.196	0.149	0.155	0.104	0.106	0.072	0.075
326	0.188	0.196	0.149	0.155	0.104	0.106	0.072	0.075
326.2	0.189	0.196	0.149	0.155	0.104	0.106	0.072	0.075
326.4	0.189	0.196	0.148	0.155	0.104	0.106	0.072	0.075
326.6	0.189	0.196	0.148	0.155	0.103	0.107	0.072	0.075
326.8	0.189	0.196	0.148	0.155	0.103	0.107	0.071	0.075
327	0.189	0.196	0.149	0.155	0.103	0.107	0.072	0.075
327.2	0.189	0.196	0.149	0.155	0.103	0.107	0.072	0.075
327.4	0.189	0.196	0.149	0.155	0.103	0.107	0.072	0.075
327.6	0.19	0.196	0.149	0.155	0.104	0.107	0.072	0.075
327.8	0.19	0.196	0.149	0.155	0.104	0.107	0.072	0.075
328	0.19	0.196	0.149	0.155	0.104	0.107	0.073	0.075
328.2	0.19	0.196	0.15	0.155	0.105	0.107	0.073	0.075
328.4	0.191	0.196	0.151	0.155	0.105	0.107	0.073	0.075
328.6	0.191	0.196	0.151	0.155	0.106	0.107	0.074	0.075
328.8	0.191	0.196	0.151	0.155	0.107	0.107	0.074	0.075
329	0.191	0.196	0.151	0.155	0.106	0.107	0.074	0.075
329.2	0.191	0.196	0.151	0.156	0.105	0.107	0.074	0.075
329.4	0.191	0.196	0.151	0.156	0.105	0.107	0.074	0.075
329.6	0.191	0.196	0.151	0.156	0.104	0.107	0.073	0.075
329.8	0.19	0.196	0.151	0.156	0.104	0.107	0.073	0.075
330	0.19	0.197	0.15	0.156	0.103	0.107	0.073	0.075
330.2	0.189	0.197	0.15	0.156	0.102	0.107	0.072	0.075
330.4	0.188	0.197	0.149	0.156	0.102	0.107	0.072	0.075
330.6	0.189	0.197	0.15	0.156	0.101	0.107	0.072	0.075
330.8	0.189	0.197	0.15	0.156	0.101	0.107	0.072	0.075
331	0.189	0.197	0.15	0.156	0.101	0.107	0.072	0.075
331.2	0.19	0.197	0.15	0.156	0.101	0.107	0.072	0.075
331.4	0.191	0.197	0.15	0.156	0.101	0.107	0.073	0.075
331.6	0.191	0.197	0.151	0.156	0.102	0.107	0.073	0.075
331.8	0.191	0.197	0.151	0.156	0.102	0.107	0.073	0.075
332	0.192	0.197	0.151	0.156	0.103	0.107	0.073	0.075
332.2	0.192	0.197	0.151	0.156	0.103	0.107	0.073	0.075
332.4	0.193	0.197	0.152	0.156	0.105	0.107	0.074	0.075
332.6	0.192	0.197	0.152	0.156	0.105	0.107	0.074	0.075
332.8	0.192	0.197	0.152	0.156	0.105	0.107	0.074	0.075
333	0.191	0.197	0.151	0.156	0.104	0.107	0.073	0.075
333.2	0.191	0.197	0.152	0.156	0.104	0.107	0.073	0.075
333.4	0.191	0.197	0.151	0.156	0.104	0.107	0.073	0.075
333.6	0.191	0.197	0.151	0.156	0.104	0.107	0.073	0.075
333.8	0.191	0.197	0.151	0.156	0.104	0.107	0.074	0.075
334	0.191	0.197	0.151	0.156	0.104	0.107	0.074	0.075
334.2	0.19	0.197	0.151	0.156	0.104	0.107	0.074	0.075
334.4	0.191	0.197	0.15	0.156	0.104	0.107	0.073	0.075
334.6	0.191	0.197	0.15	0.156	0.104	0.108	0.074	0.075
334.8	0.191	0.197	0.15	0.156	0.103	0.108	0.074	0.075
335	0.191	0.197	0.15	0.156	0.104	0.108	0.074	0.075
335.2	0.191	0.197	0.15	0.156	0.104	0.108	0.075	0.075
335.4	0.191	0.197	0.15	0.156	0.104	0.108	0.075	0.075
335.6	0.191	0.197	0.15	0.157	0.104	0.108	0.074	0.076
335.8	0.191	0.197	0.15	0.157	0.104	0.108	0.074	0.076
336	0.191	0.198	0.15	0.157	0.104	0.108	0.074	0.076
336.2	0.191	0.198	0.151	0.157	0.104	0.108	0.074	0.076
336.4	0.192	0.198	0.152	0.157	0.105	0.108	0.074	0.076
336.6	0.191	0.198	0.152	0.157	0.105	0.108	0.074	0.076
336.8	0.191	0.198	0.152	0.157	0.104	0.108	0.073	0.076
337	0.191	0.198	0.152	0.157	0.105	0.108	0.073	0.076
337.2	0.192	0.198	0.153	0.157	0.105	0.108	0.073	0.076
337.4	0.192	0.198	0.152	0.157	0.105	0.108	0.073	0.076
337.6	0.192	0.198	0.152	0.157	0.105	0.108	0.073	0.076
337.8	0.192	0.198	0.152	0.157	0.105	0.108	0.073	0.076
338	0.192	0.198	0.152	0.157	0.105	0.108	0.073	0.076
338.2	0.191	0.198	0.152	0.157	0.106	0.108	0.073	0.076
338.4	0.192	0.198	0.152	0.157	0.106	0.108	0.073	0.076
338.6	0.192	0.198	0.152	0.157	0.106	0.108	0.073	0.076
338.8	0.192	0.198	0.152	0.157	0.106	0.108	0.074	0.076
339	0.193	0.198	0.152	0.157	0.106	0.108	0.074	0.076
339.2	0.192	0.198	0.152	0.157	0.106	0.108	0.074	0.076
339.4	0.192	0.198	0.152	0.157	0.106	0.108	0.074	0.076
339.6	0.193	0.198	0.152	0.157	0.106	0.108	0.074	0.076
339.8	0.193	0.198	0.152	0.157	0.106	0.108	0.074	0.076
340	0.193	0.198	0.153	0.157	0.105	0.108	0.074	0.076
340.2	0.193	0.198	0.153	0.157	0.106	0.108	0.074	0.076
340.4	0.193	0.198	0.153	0.157	0.105	0.108	0.074	0.076
340.6	0.194	0.198	0.153	0.157	0.105	0.108	0.074	0.076
340.8	0.194	0.198	0.152	0.157	0.105	0.108	0.074	0.076
341	0.195	0.198	0.153	0.157	0.106	0.108	0.075	0.076
341.2	0.194	0.198	0.152	0.157	0.105	0.108	0.074	0.076
341.4	0.194	0.198	0.152	0.157	0.105	0.108	0.075	0.076
341.6	0.194	0.198	0.152	0.157	0.106	0.108	0.075	0.076
341.8	0.194	0.198	0.152	0.157	0.106	0.108	0.075	0.076
342	0.194	0.198	0.152	0.157	0.107	0.108	0.075	0.076
342.2	0.194	0.199	0.152	0.157	0.107	0.108	0.075	0.076
342.4	0.194	0.199	0.152	0.158	0.107	0.108	0.075	0.076
342.6	0.194	0.199	0.153	0.158	0.107	0.108	0.075	0.076
342.8	0.194	0.199	0.154	0.158	0.108	0.109	0.076	0.076
343	0.194	0.199	0.154	0.158	0.108	0.109	0.075	0.076
343.2	0.194	0.199	0.154	0.158	0.108	0.109	0.075	0.076
343.4	0.194	0.199	0.154	0.158	0.107	0.109	0.075	0.076
343.6	0.194	0.199	0.154	0.158	0.108	0.109	0.075	0.076
343.8	0.194	0.199	0.154	0.158	0.107	0.109	0.075	0.076
344	0.194	0.199	0.155	0.158	0.108	0.109	0.075	0.076
344.2	0.193	0.199	0.154	0.158	0.107	0.109	0.075	0.076
344.4	0.193	0.199	0.154	0.158	0.107	0.109	0.075	0.076
344.6	0.193	0.199	0.154	0.158	0.106	0.109	0.075	0.076
344.8	0.193	0.199	0.154	0.158	0.106	0.109	0.075	0.076
345	0.193	0.199	0.153	0.158	0.105	0.109	0.075	0.076
345.2	0.193	0.199	0.153	0.158	0.106	0.109	0.075	0.076
345.4	0.193	0.199	0.153	0.158	0.106	0.109	0.076	0.076
345.6	0.194	0.199	0.153	0.158	0.107	0.109	0.076	0.076
345.8	0.193	0.199	0.153	0.158	0.106	0.109	0.076	0.076
346	0.194	0.199	0.153	0.158	0.107	0.109	0.076	0.076
346.2	0.194	0.199	0.154	0.158	0.107	0.109	0.076	0.077
346.4	0.194	0.199	0.154	0.158	0.107	0.109	0.076	0.077
346.6	0.194	0.199	0.154	0.158	0.107	0.109	0.076	0.077
346.8	0.195	0.199	0.154	0.158	0.107	0.109	0.076	0.077
347	0.195	0.199	0.154	0.158	0.107	0.109	0.076	0.077
347.2	0.195	0.199	0.154	0.158	0.107	0.109	0.075	0.077
347.4	0.195	0.199	0.154	0.158	0.107	0.109	0.075	0.077
347.6	0.195	0.199	0.154	0.158	0.108	0.109	0.075	0.077
347.8	0.195	0.199	0.154	0.158	0.107	0.109	0.075	0.077
348	0.194	0.199	0.153	0.158	0.107	0.109	0.075	0.077
348.2	0.194	0.199	0.153	0.158	0.107	0.109	0.075	0.077
348.4	0.194	0.199	0.153	0.158	0.106	0.109	0.075	0.077
348.6	0.194	0.2	0.154	0.158	0.107	0.109	0.075	0.077
348.8	0.194	0.2	0.154	0.158	0.107	0.109	0.075	0.077
349	0.194	0.2	0.155	0.158	0.107	0.109	0.076	0.077
349.2	0.195	0.2	0.155	0.159	0.108	0.109	0.076	0.077
349.4	0.196	0.2	0.156	0.159	0.109	0.109	0.076	0.077
349.6	0.195	0.2	0.156	0.159	0.109	0.109	0.076	0.077
349.8	0.196	0.2	0.156	0.159	0.109	0.109	0.076	0.077
350	0.196	0.2	0.157	0.159	0.109	0.109	0.076	0.077
350.2	0.197	0.2	0.157	0.159	0.109	0.109	0.076	0.077
350.4	0.196	0.2	0.157	0.159	0.108	0.109	0.076	0.077
350.6	0.196	0.2	0.156	0.159	0.107	0.109	0.075	0.077
350.8	0.196	0.2	0.156	0.159	0.107	0.109	0.075	0.077
351	0.195	0.2	0.155	0.159	0.107	0.109	0.074	0.077
351.2	0.195	0.2	0.154	0.159	0.107	0.109	0.074	0.077
351.4	0.195	0.2	0.154	0.159	0.107	0.11	0.074	0.077
351.6	0.194	0.2	0.153	0.159	0.107	0.11	0.073	0.077
351.8	0.194	0.2	0.152	0.159	0.106	0.11	0.074	0.077
352	0.194	0.2	0.152	0.159	0.105	0.11	0.073	0.077
352.2	0.194	0.2	0.153	0.159	0.106	0.11	0.073	0.077
352.4	0.195	0.2	0.153	0.159	0.106	0.11	0.074	0.077
352.6	0.195	0.2	0.154	0.159	0.106	0.11	0.075	0.077
352.8	0.195	0.2	0.154	0.159	0.107	0.11	0.075	0.077
353	0.195	0.2	0.154	0.159	0.107	0.11	0.075	0.077
353.2	0.196	0.2	0.155	0.159	0.108	0.11	0.075	0.077
353.4	0.196	0.2	0.155	0.159	0.108	0.11	0.076	0.077
353.6	0.197	0.2	0.156	0.159	0.109	0.11	0.077	0.077
353.8	0.197	0.2	0.156	0.159	0.109	0.11	0.077	0.077
354	0.197	0.2	0.156	0.159	0.109	0.11	0.077	0.077
354.2	0.197	0.2	0.156	0.159	0.109	0.11	0.077	0.077
354.4	0.197	0.2	0.157	0.159	0.109	0.11	0.077	0.077
354.6	0.197	0.2	0.156	0.159	0.109	0.11	0.077	0.077
354.8	0.197	0.2	0.156	0.159	0.109	0.11	0.077	0.077
355	0.196	0.2	0.156	0.159	0.109	0.11	0.077	0.077
355.2	0.196	0.2	0.156	0.159	0.109	0.11	0.078	0.077
355.4	0.197	0.201	0.155	0.159	0.109	0.11	0.078	0.077
355.6	0.197	0.201	0.155	0.159	0.109	0.11	0.078	0.077
355.8	0.197	0.201	0.156	0.159	0.109	0.11	0.078	0.077
356	0.197	0.201	0.156	0.159	0.109	0.11	0.077	0.077
356.2	0.197	0.201	0.156	0.159	0.109	0.11	0.078	0.077
356.4	0.198	0.201	0.157	0.16	0.109	0.11	0.078	0.077
356.6	0.197	0.201	0.157	0.16	0.109	0.11	0.078	0.077
356.8	0.197	0.201	0.157	0.16	0.11	0.11	0.077	0.077
357	0.197	0.201	0.157	0.16	0.11	0.11	0.077	0.078
357.2	0.197	0.201	0.157	0.16	0.11	0.11	0.077	0.078
357.4	0.197	0.201	0.157	0.16	0.11	0.11	0.077	0.078
357.6	0.197	0.201	0.157	0.16	0.11	0.11	0.077	0.078
357.8	0.196	0.201	0.157	0.16	0.11	0.11	0.077	0.078
358	0.196	0.201	0.157	0.16	0.11	0.11	0.077	0.078
358.2	0.196	0.201	0.157	0.16	0.11	0.11	0.077	0.078
358.4	0.197	0.201	0.157	0.16	0.111	0.11	0.077	0.078
358.6	0.197	0.201	0.157	0.16	0.11	0.11	0.077	0.078
358.8	0.197	0.201	0.156	0.16	0.11	0.11	0.077	0.078
359	0.197	0.201	0.156	0.16	0.109	0.11	0.077	0.078
359.2	0.196	0.201	0.156	0.16	0.109	0.11	0.077	0.078
359.4	0.197	0.201	0.156	0.16	0.109	0.11	0.076	0.078
359.6	0.197	0.201	0.156	0.16	0.109	0.11	0.076	0.078
359.8	0.197	0.201	0.156	0.16	0.109	0.11	0.077	0.078
360	0.197	0.201	0.156	0.16	0.109	0.11	0.076	0.078
360.2	0.197	0.201	0.156	0.16	0.108	0.111	0.076	0.078
360.4	0.198	0.201	0.156	0.16	0.108	0.111	0.076	0.078
360.6	0.197	0.201	0.157	0.16	0.108	0.111	0.076	0.078
360.8	0.197	0.201	0.156	0.16	0.108	0.111	0.076	0.078
361	0.197	0.201	0.156	0.16	0.108	0.111	0.077	0.078
361.2	0.197	0.201	0.156	0.16	0.108	0.111	0.077	0.078
361.4	0.196	0.201	0.156	0.16	0.109	0.111	0.077	0.078
361.6	0.196	0.201	0.156	0.16	0.109	0.111	0.077	0.078
361.8	0.196	0.201	0.156	0.16	0.109	0.111	0.077	0.078
362	0.197	0.201	0.157	0.16	0.11	0.111	0.078	0.078
362.2	0.196	0.201	0.157	0.16	0.11	0.111	0.077	0.078
362.4	0.197	0.202	0.157	0.16	0.11	0.111	0.078	0.078
362.6	0.196	0.202	0.156	0.16	0.11	0.111	0.077	0.078
362.8	0.196	0.202	0.156	0.16	0.11	0.111	0.078	0.078
363	0.196	0.202	0.156	0.16	0.11	0.111	0.077	0.078
363.2	0.196	0.202	0.156	0.16	0.11	0.111	0.077	0.078
363.4	0.197	0.202	0.157	0.16	0.11	0.111	0.077	0.078
363.6	0.197	0.202	0.157	0.16	0.11	0.111	0.077	0.078
363.8	0.197	0.202	0.157	0.16	0.11	0.111	0.077	0.078
364	0.197	0.202	0.157	0.161	0.11	0.111	0.077	0.078
364.2	0.198	0.202	0.157	0.161	0.11	0.111	0.077	0.078
364.4	0.198	0.202	0.157	0.161	0.111	0.111	0.077	0.078
364.6	0.198	0.202	0.157	0.161	0.11	0.111	0.076	0.078
364.8	0.198	0.202	0.157	0.161	0.11	0.111	0.076	0.078
365	0.198	0.202	0.157	0.161	0.11	0.111	0.076	0.078
365.2	0.198	0.202	0.157	0.161	0.11	0.111	0.076	0.078
365.4	0.199	0.202	0.157	0.161	0.11	0.111	0.076	0.078
365.6	0.199	0.202	0.157	0.161	0.11	0.111	0.076	0.078
365.8	0.199	0.202	0.157	0.161	0.11	0.111	0.076	0.078
366	0.199	0.202	0.158	0.161	0.11	0.111	0.076	0.078
366.2	0.199	0.202	0.157	0.161	0.11	0.111	0.076	0.078
366.4	0.199	0.202	0.157	0.161	0.11	0.111	0.077	0.078
366.6	0.199	0.202	0.157	0.161	0.111	0.111	0.077	0.078
366.8	0.2	0.202	0.158	0.161	0.111	0.111	0.077	0.078
367	0.2	0.202	0.158	0.161	0.111	0.111	0.077	0.078
367.2	0.2	0.202	0.158	0.161	0.112	0.111	0.078	0.078
367.4	0.2	0.202	0.158	0.161	0.112	0.111	0.078	0.078
367.6	0.199	0.202	0.159	0.161	0.112	0.111	0.078	0.078
367.8	0.199	0.202	0.159	0.161	0.112	0.111	0.078	0.078
368	0.199	0.202	0.159	0.161	0.112	0.111	0.077	0.078
368.2	0.199	0.202	0.159	0.161	0.112	0.111	0.077	0.078
368.4	0.199	0.202	0.16	0.161	0.112	0.111	0.077	0.078
368.6	0.199	0.202	0.159	0.161	0.112	0.111	0.077	0.079
368.8	0.199	0.202	0.159	0.161	0.112	0.111	0.077	0.079
369	0.199	0.202	0.158	0.161	0.112	0.111	0.077	0.079
369.2	0.199	0.202	0.159	0.161	0.113	0.111	0.077	0.079
369.4	0.199	0.202	0.159	0.161	0.113	0.111	0.077	0.079
369.6	0.199	0.202	0.158	0.161	0.112	0.112	0.077	0.079
369.8	0.199	0.203	0.158	0.161	0.112	0.112	0.077	0.079
370	0.199	0.203	0.158	0.161	0.111	0.112	0.077	0.079
370.2	0.199	0.203	0.157	0.161	0.111	0.112	0.077	0.079
370.4	0.199	0.203	0.158	0.161	0.111	0.112	0.077	0.079
370.6	0.199	0.203	0.158	0.161	0.11	0.112	0.077	0.079
370.8	0.199	0.203	0.158	0.161	0.11	0.112	0.077	0.079
371	0.198	0.203	0.158	0.161	0.109	0.112	0.077	0.079
371.2	0.198	0.203	0.157	0.161	0.109	0.112	0.077	0.079
371.4	0.198	0.203	0.157	0.161	0.109	0.112	0.078	0.079
371.6	0.198	0.203	0.158	0.161	0.109	0.112	0.078	0.079
371.8	0.198	0.203	0.158	0.162	0.109	0.112	0.078	0.079
372	0.199	0.203	0.158	0.162	0.109	0.112	0.078	0.079
372.2	0.199	0.203	0.159	0.162	0.11	0.112	0.078	0.079
372.4	0.199	0.203	0.16	0.162	0.11	0.112	0.078	0.079
372.6	0.199	0.203	0.16	0.162	0.111	0.112	0.078	0.079
372.8	0.199	0.203	0.159	0.162	0.111	0.112	0.078	0.079
373	0.2	0.203	0.16	0.162	0.112	0.112	0.078	0.079
373.2	0.201	0.203	0.161	0.162	0.113	0.112	0.079	0.079
373.4	0.201	0.203	0.16	0.162	0.113	0.112	0.079	0.079
373.6	0.201	0.203	0.16	0.162	0.113	0.112	0.079	0.079
373.8	0.201	0.203	0.16	0.162	0.112	0.112	0.078	0.079
374	0.201	0.203	0.16	0.162	0.112	0.112	0.078	0.079
374.2	0.2	0.203	0.16	0.162	0.112	0.112	0.078	0.079
374.4	0.2	0.203	0.16	0.162	0.112	0.112	0.077	0.079
374.6	0.2	0.203	0.16	0.162	0.112	0.112	0.077	0.079
374.8	0.2	0.203	0.16	0.162	0.112	0.112	0.077	0.079
375	0.2	0.203	0.159	0.162	0.111	0.112	0.077	0.079
375.2	0.201	0.203	0.159	0.162	0.111	0.112	0.077	0.079
375.4	0.201	0.203	0.159	0.162	0.112	0.112	0.077	0.079
375.6	0.201	0.203	0.159	0.162	0.111	0.112	0.077	0.079
375.8	0.201	0.203	0.159	0.162	0.112	0.112	0.078	0.079
376	0.201	0.203	0.159	0.162	0.112	0.112	0.078	0.079
376.2	0.201	0.203	0.16	0.162	0.112	0.112	0.078	0.079
376.4	0.201	0.203	0.161	0.162	0.112	0.112	0.079	0.079
376.6	0.201	0.203	0.16	0.162	0.112	0.112	0.078	0.079
376.8	0.202	0.203	0.161	0.162	0.113	0.112	0.079	0.079
377	0.203	0.203	0.16	0.162	0.114	0.112	0.079	0.079
377.2	0.203	0.203	0.16	0.162	0.114	0.112	0.08	0.079
377.4	0.203	0.204	0.16	0.162	0.114	0.112	0.08	0.079
377.6	0.203	0.204	0.16	0.162	0.114	0.112	0.08	0.079
377.8	0.202	0.204	0.16	0.162	0.113	0.112	0.08	0.079
378	0.202	0.204	0.16	0.162	0.113	0.112	0.08	0.079
378.2	0.201	0.204	0.16	0.162	0.113	0.112	0.08	0.079
378.4	0.201	0.204	0.16	0.162	0.113	0.112	0.079	0.079
378.6	0.2	0.204	0.159	0.162	0.112	0.112	0.079	0.079
378.8	0.201	0.204	0.159	0.162	0.112	0.112	0.079	0.079
379	0.2	0.204	0.159	0.162	0.112	0.112	0.079	0.079
379.2	0.2	0.204	0.159	0.162	0.112	0.112	0.079	0.079
379.4	0.2	0.204	0.159	0.162	0.112	0.113	0.078	0.079
379.6	0.2	0.204	0.159	0.162	0.112	0.113	0.078	0.079
379.8	0.2	0.204	0.159	0.162	0.112	0.113	0.078	0.079
380	0.199	0.204	0.16	0.163	0.112	0.113	0.078	0.079
380.2	0.199	0.204	0.16	0.163	0.112	0.113	0.078	0.079
380.4	0.2	0.204	0.16	0.163	0.112	0.113	0.078	0.079
380.6	0.2	0.204	0.16	0.163	0.112	0.113	0.078	0.08
380.8	0.2	0.204	0.16	0.163	0.113	0.113	0.079	0.08
381	0.2	0.204	0.16	0.163	0.113	0.113	0.079	0.08
381.2	0.2	0.204	0.161	0.163	0.113	0.113	0.079	0.08
381.4	0.201	0.204	0.161	0.163	0.114	0.113	0.08	0.08
381.6	0.201	0.204	0.161	0.163	0.113	0.113	0.079	0.08
381.8	0.2	0.204	0.161	0.163	0.113	0.113	0.079	0.08
382	0.2	0.204	0.161	0.163	0.113	0.113	0.079	0.08
382.2	0.2	0.204	0.16	0.163	0.112	0.113	0.079	0.08
382.4	0.2	0.204	0.16	0.163	0.112	0.113	0.078	0.08
382.6	0.2	0.204	0.16	0.163	0.112	0.113	0.078	0.08
382.8	0.2	0.204	0.16	0.163	0.112	0.113	0.078	0.08
383	0.2	0.204	0.16	0.163	0.113	0.113	0.078	0.08
383.2	0.201	0.204	0.161	0.163	0.113	0.113	0.078	0.08
383.4	0.201	0.204	0.16	0.163	0.113	0.113	0.078	0.08
383.6	0.201	0.204	0.161	0.163	0.113	0.113	0.078	0.08
383.8	0.201	0.204	0.16	0.163	0.113	0.113	0.078	0.08
384	0.201	0.204	0.16	0.163	0.113	0.113	0.078	0.08
384.2	0.202	0.204	0.16	0.163	0.113	0.113	0.079	0.08
384.4	0.202	0.204	0.16	0.163	0.113	0.113	0.079	0.08
384.6	0.202	0.204	0.16	0.163	0.113	0.113	0.079	0.08
384.8	0.202	0.204	0.16	0.163	0.113	0.113	0.08	0.08
385	0.202	0.204	0.16	0.163	0.114	0.113	0.08	0.08
385.2	0.202	0.204	0.161	0.163	0.114	0.113	0.08	0.08
385.4	0.202	0.204	0.161	0.163	0.114	0.113	0.08	0.08
385.6	0.201	0.205	0.16	0.163	0.114	0.113	0.08	0.08
385.8	0.201	0.205	0.16	0.163	0.114	0.113	0.08	0.08
386	0.201	0.205	0.16	0.163	0.114	0.113	0.08	0.08
386.2	0.201	0.205	0.16	0.163	0.114	0.113	0.08	0.08
386.4	0.201	0.205	0.16	0.163	0.114	0.113	0.08	0.08
386.6	0.201	0.205	0.16	0.163	0.114	0.113	0.08	0.08
386.8	0.201	0.205	0.16	0.163	0.114	0.113	0.079	0.08
387	0.201	0.205	0.16	0.163	0.114	0.113	0.079	0.08
387.2	0.201	0.205	0.161	0.163	0.114	0.113	0.08	0.08
387.4	0.201	0.205	0.161	0.163	0.114	0.113	0.08	0.08
387.6	0.202	0.205	0.161	0.163	0.114	0.113	0.08	0.08
387.8	0.202	0.205	0.16	0.163	0.114	0.113	0.08	0.08
388	0.202	0.205	0.16	0.163	0.114	0.113	0.081	0.08
388.2	0.203	0.205	0.161	0.163	0.114	0.113	0.082	0.08
388.4	0.203	0.205	0.161	0.163	0.114	0.113	0.082	0.08
388.6	0.203	0.205	0.161	0.164	0.113	0.113	0.081	0.08
388.8	0.204	0.205	0.161	0.164	0.114	0.113	0.082	0.08
389	0.204	0.205	0.161	0.164	0.114	0.113	0.082	0.08
389.2	0.204	0.205	0.162	0.164	0.114	0.113	0.081	0.08
389.4	0.204	0.205	0.162	0.164	0.115	0.113	0.081	0.08
389.6	0.203	0.205	0.162	0.164	0.114	0.113	0.081	0.08
389.8	0.203	0.205	0.162	0.164	0.114	0.114	0.08	0.08
390	0.202	0.205	0.161	0.164	0.114	0.114	0.08	0.08
390.2	0.202	0.205	0.162	0.164	0.113	0.114	0.08	0.08
390.4	0.202	0.205	0.161	0.164	0.113	0.114	0.08	0.08
390.6	0.201	0.205	0.16	0.164	0.112	0.114	0.079	0.08
390.8	0.201	0.205	0.161	0.164	0.112	0.114	0.079	0.08
391	0.201	0.205	0.161	0.164	0.113	0.114	0.08	0.08
391.2	0.201	0.205	0.162	0.164	0.113	0.114	0.08	0.08
391.4	0.201	0.205	0.162	0.164	0.113	0.114	0.079	0.08
391.6	0.202	0.205	0.161	0.164	0.113	0.114	0.079	0.08
391.8	0.202	0.205	0.161	0.164	0.113	0.114	0.079	0.08
392	0.202	0.205	0.162	0.164	0.113	0.114	0.08	0.08
392.2	0.203	0.205	0.162	0.164	0.113	0.114	0.08	0.08
392.4	0.203	0.205	0.162	0.164	0.113	0.114	0.08	0.08
392.6	0.204	0.205	0.163	0.164	0.114	0.114	0.08	0.08
392.8	0.204	0.205	0.163	0.164	0.114	0.114	0.08	0.08
393	0.204	0.205	0.163	0.164	0.115	0.114	0.08	0.08
393.2	0.206	0.205	0.164	0.164	0.115	0.114	0.08	0.08
393.4	0.206	0.205	0.164	0.164	0.116	0.114	0.08	0.081
393.6	0.206	0.205	0.164	0.164	0.116	0.114	0.08	0.081
393.8	0.205	0.205	0.163	0.164	0.116	0.114	0.08	0.081
394	0.205	0.205	0.163	0.164	0.116	0.114	0.08	0.081
394.2	0.205	0.206	0.163	0.164	0.116	0.114	0.08	0.081
394.4	0.205	0.206	0.163	0.164	0.116	0.114	0.08	0.081
394.6	0.205	0.206	0.162	0.164	0.116	0.114	0.08	0.081
394.8	0.205	0.206	0.162	0.164	0.116	0.114	0.08	0.081
395	0.204	0.206	0.162	0.164	0.115	0.114	0.08	0.081
395.2	0.204	0.206	0.162	0.164	0.115	0.114	0.079	0.081
395.4	0.203	0.206	0.162	0.164	0.115	0.114	0.079	0.081
395.6	0.203	0.206	0.162	0.164	0.114	0.114	0.078	0.081
395.8	0.203	0.206	0.161	0.164	0.114	0.114	0.079	0.081
396	0.202	0.206	0.162	0.164	0.113	0.114	0.079	0.081
396.2	0.202	0.206	0.162	0.164	0.113	0.114	0.079	0.081
396.4	0.202	0.206	0.162	0.164	0.113	0.114	0.079	0.081
396.6	0.202	0.206	0.162	0.164	0.113	0.114	0.08	0.081
396.8	0.203	0.206	0.162	0.164	0.113	0.114	0.08	0.081
397	0.203	0.206	0.162	0.164	0.113	0.114	0.08	0.081
397.2	0.203	0.206	0.163	0.164	0.114	0.114	0.08	0.081
397.4	0.204	0.206	0.162	0.164	0.114	0.114	0.08	0.081
397.6	0.204	0.206	0.162	0.165	0.114	0.114	0.079	0.081
397.8	0.204	0.206	0.162	0.165	0.114	0.114	0.079	0.081
398	0.205	0.206	0.163	0.165	0.114	0.114	0.08	0.081
398.2	0.205	0.206	0.163	0.165	0.115	0.114	0.08	0.081
398.4	0.205	0.206	0.163	0.165	0.115	0.114	0.08	0.081
398.6	0.205	0.206	0.163	0.165	0.115	0.114	0.08	0.081
398.8	0.205	0.206	0.163	0.165	0.115	0.114	0.08	0.081
399	0.205	0.206	0.163	0.165	0.115	0.114	0.08	0.081
399.2	0.204	0.206	0.163	0.165	0.115	0.114	0.081	0.081
399.4	0.204	0.206	0.163	0.165	0.116	0.114	0.081	0.081
399.6	0.204	0.206	0.163	0.165	0.115	0.114	0.081	0.081
[truncated: 4,001 more rows]

## Sheet: Fig1f
BLI sensorgrams for Fig.1e NB9 binds to FZD6
time (s)	response(nm) 1024 nM	fit	response(nm) 512 nM	fit	response(nm) 256 nM	fit	response(nm) 128 nM	fit
0.2	0	0	0	0	0	0	0	0
0.4	0.001	0	0	0	0.001	0	0	0
0.6	0.002	0.001	0	0	0.001	0	0	0
0.8	0.002	0.001	0	0.001	0.002	0.001	0	0
1	0.003	0.001	0	0.001	0.003	0.001	-0.001	0
1.2	0.005	0.001	0	0.001	0.003	0.001	0	0
1.4	0.005	0.002	0	0.001	0.004	0.001	0	0.001
1.6	0.006	0.002	0.001	0.001	0.005	0.001	0	0.001
1.8	0.007	0.002	0.001	0.001	0.005	0.001	0	0.001
2	0.008	0.002	0.002	0.002	0.005	0.001	0	0.001
2.2	0.009	0.003	0.002	0.002	0.005	0.002	0.001	0.001
2.4	0.01	0.003	0.003	0.002	0.006	0.002	0.001	0.001
2.6	0.01	0.003	0.004	0.002	0.006	0.002	0.001	0.001
2.8	0.011	0.003	0.004	0.002	0.006	0.002	0.001	0.001
3	0.011	0.003	0.005	0.002	0.007	0.002	0.001	0.001
3.2	0.012	0.004	0.005	0.002	0.007	0.002	0.001	0.001
3.4	0.013	0.004	0.006	0.003	0.008	0.002	0.002	0.001
3.6	0.014	0.004	0.007	0.003	0.008	0.003	0.002	0.001
3.8	0.015	0.004	0.008	0.003	0.009	0.003	0.002	0.001
4	0.015	0.005	0.008	0.003	0.009	0.003	0.002	0.001
4.2	0.016	0.005	0.008	0.003	0.009	0.003	0.002	0.001
4.4	0.016	0.005	0.009	0.003	0.01	0.003	0.002	0.002
4.6	0.016	0.005	0.009	0.004	0.011	0.003	0.002	0.002
4.8	0.017	0.006	0.009	0.004	0.011	0.003	0.002	0.002
5	0.017	0.006	0.01	0.004	0.012	0.004	0.003	0.002
5.2	0.018	0.006	0.01	0.004	0.012	0.004	0.003	0.002
5.4	0.018	0.006	0.01	0.004	0.013	0.004	0.002	0.002
5.6	0.019	0.006	0.011	0.004	0.013	0.004	0.003	0.002
5.8	0.019	0.007	0.011	0.004	0.013	0.004	0.003	0.002
6	0.02	0.007	0.012	0.005	0.014	0.004	0.003	0.002
6.2	0.021	0.007	0.012	0.005	0.014	0.004	0.004	0.002
6.4	0.021	0.007	0.013	0.005	0.014	0.005	0.005	0.002
6.6	0.021	0.008	0.014	0.005	0.014	0.005	0.005	0.002
6.8	0.022	0.008	0.014	0.005	0.014	0.005	0.006	0.002
7	0.022	0.008	0.014	0.005	0.014	0.005	0.006	0.002
7.2	0.023	0.008	0.014	0.006	0.014	0.005	0.005	0.003
7.4	0.023	0.008	0.014	0.006	0.015	0.005	0.005	0.003
7.6	0.024	0.009	0.014	0.006	0.015	0.005	0.005	0.003
7.8	0.024	0.009	0.014	0.006	0.014	0.005	0.005	0.003
8	0.024	0.009	0.014	0.006	0.014	0.006	0.005	0.003
8.2	0.024	0.009	0.014	0.006	0.014	0.006	0.005	0.003
8.4	0.024	0.01	0.014	0.006	0.014	0.006	0.004	0.003
8.6	0.023	0.01	0.013	0.007	0.014	0.006	0.004	0.003
8.8	0.024	0.01	0.014	0.007	0.015	0.006	0.004	0.003
9	0.024	0.01	0.014	0.007	0.015	0.006	0.004	0.003
9.2	0.024	0.01	0.014	0.007	0.016	0.006	0.003	0.003
9.4	0.025	0.011	0.014	0.007	0.016	0.007	0.003	0.003
9.6	0.025	0.011	0.015	0.007	0.016	0.007	0.003	0.003
9.8	0.026	0.011	0.015	0.007	0.017	0.007	0.004	0.003
10	0.027	0.011	0.016	0.008	0.017	0.007	0.004	0.004
10.2	0.028	0.012	0.017	0.008	0.018	0.007	0.004	0.004
10.4	0.028	0.012	0.018	0.008	0.018	0.007	0.004	0.004
10.6	0.029	0.012	0.018	0.008	0.018	0.007	0.005	0.004
10.8	0.03	0.012	0.019	0.008	0.018	0.007	0.006	0.004
11	0.031	0.012	0.02	0.008	0.019	0.008	0.006	0.004
11.2	0.031	0.013	0.02	0.008	0.019	0.008	0.006	0.004
11.4	0.032	0.013	0.021	0.009	0.02	0.008	0.007	0.004
11.6	0.032	0.013	0.021	0.009	0.02	0.008	0.008	0.004
11.8	0.033	0.013	0.021	0.009	0.02	0.008	0.007	0.004
12	0.033	0.013	0.021	0.009	0.021	0.008	0.008	0.004
12.2	0.033	0.014	0.021	0.009	0.02	0.008	0.008	0.004
12.4	0.032	0.014	0.021	0.009	0.02	0.009	0.007	0.004
12.6	0.032	0.014	0.021	0.009	0.02	0.009	0.008	0.004
12.8	0.032	0.014	0.021	0.01	0.02	0.009	0.008	0.004
13	0.032	0.015	0.021	0.01	0.02	0.009	0.008	0.005
13.2	0.032	0.015	0.02	0.01	0.02	0.009	0.007	0.005
13.4	0.032	0.015	0.021	0.01	0.02	0.009	0.007	0.005
13.6	0.032	0.015	0.02	0.01	0.02	0.009	0.007	0.005
13.8	0.032	0.015	0.02	0.01	0.02	0.009	0.007	0.005
14	0.033	0.016	0.02	0.011	0.02	0.01	0.007	0.005
14.2	0.034	0.016	0.021	0.011	0.02	0.01	0.007	0.005
14.4	0.034	0.016	0.021	0.011	0.02	0.01	0.007	0.005
14.6	0.034	0.016	0.021	0.011	0.021	0.01	0.008	0.005
14.8	0.035	0.016	0.021	0.011	0.021	0.01	0.009	0.005
15	0.035	0.017	0.021	0.011	0.021	0.01	0.008	0.005
15.2	0.036	0.017	0.021	0.011	0.021	0.01	0.008	0.005
15.4	0.036	0.017	0.021	0.012	0.022	0.011	0.009	0.005
15.6	0.037	0.017	0.021	0.012	0.023	0.011	0.009	0.005
15.8	0.038	0.018	0.022	0.012	0.023	0.011	0.009	0.005
16	0.038	0.018	0.022	0.012	0.023	0.011	0.009	0.006
16.2	0.039	0.018	0.023	0.012	0.023	0.011	0.009	0.006
16.4	0.039	0.018	0.023	0.012	0.023	0.011	0.009	0.006
16.6	0.039	0.018	0.023	0.012	0.023	0.011	0.009	0.006
16.8	0.039	0.019	0.023	0.013	0.023	0.011	0.008	0.006
17	0.039	0.019	0.023	0.013	0.023	0.012	0.008	0.006
17.2	0.039	0.019	0.023	0.013	0.023	0.012	0.007	0.006
17.4	0.039	0.019	0.024	0.013	0.023	0.012	0.008	0.006
17.6	0.039	0.019	0.024	0.013	0.023	0.012	0.008	0.006
17.8	0.039	0.02	0.025	0.013	0.024	0.012	0.008	0.006
18	0.039	0.02	0.025	0.013	0.024	0.012	0.008	0.006
18.2	0.039	0.02	0.025	0.013	0.024	0.012	0.007	0.006
18.4	0.038	0.02	0.025	0.014	0.023	0.012	0.007	0.006
18.6	0.038	0.02	0.025	0.014	0.024	0.013	0.007	0.006
18.8	0.038	0.021	0.025	0.014	0.024	0.013	0.007	0.006
19	0.038	0.021	0.025	0.014	0.024	0.013	0.006	0.006
19.2	0.038	0.021	0.025	0.014	0.024	0.013	0.007	0.007
19.4	0.039	0.021	0.026	0.014	0.025	0.013	0.007	0.007
19.6	0.039	0.022	0.027	0.014	0.026	0.013	0.008	0.007
19.8	0.039	0.022	0.027	0.015	0.026	0.013	0.008	0.007
20	0.039	0.022	0.027	0.015	0.026	0.013	0.008	0.007
20.2	0.04	0.022	0.028	0.015	0.026	0.014	0.009	0.007
20.4	0.04	0.022	0.027	0.015	0.026	0.014	0.008	0.007
20.6	0.04	0.023	0.028	0.015	0.027	0.014	0.009	0.007
20.8	0.041	0.023	0.028	0.015	0.027	0.014	0.009	0.007
21	0.041	0.023	0.028	0.015	0.027	0.014	0.009	0.007
21.2	0.042	0.023	0.028	0.016	0.028	0.014	0.009	0.007
21.4	0.042	0.023	0.029	0.016	0.028	0.014	0.01	0.007
21.6	0.043	0.024	0.029	0.016	0.028	0.014	0.01	0.007
21.8	0.043	0.024	0.03	0.016	0.028	0.015	0.01	0.007
22	0.043	0.024	0.029	0.016	0.027	0.015	0.01	0.007
22.2	0.043	0.024	0.029	0.016	0.027	0.015	0.01	0.008
22.4	0.044	0.024	0.028	0.016	0.027	0.015	0.01	0.008
22.6	0.044	0.025	0.028	0.017	0.027	0.015	0.01	0.008
22.8	0.044	0.025	0.028	0.017	0.027	0.015	0.01	0.008
23	0.044	0.025	0.028	0.017	0.027	0.015	0.01	0.008
23.2	0.044	0.025	0.028	0.017	0.027	0.015	0.011	0.008
23.4	0.045	0.025	0.028	0.017	0.027	0.016	0.01	0.008
23.6	0.045	0.026	0.028	0.017	0.027	0.016	0.011	0.008
23.8	0.046	0.026	0.029	0.017	0.028	0.016	0.011	0.008
24	0.046	0.026	0.029	0.018	0.028	0.016	0.011	0.008
24.2	0.046	0.026	0.029	0.018	0.029	0.016	0.011	0.008
24.4	0.047	0.026	0.029	0.018	0.028	0.016	0.011	0.008
24.6	0.048	0.027	0.029	0.018	0.028	0.016	0.011	0.008
24.8	0.048	0.027	0.03	0.018	0.029	0.016	0.011	0.008
25	0.049	0.027	0.029	0.018	0.029	0.017	0.011	0.008
25.2	0.049	0.027	0.029	0.018	0.029	0.017	0.011	0.008
25.4	0.049	0.027	0.03	0.018	0.029	0.017	0.011	0.009
25.6	0.049	0.028	0.03	0.019	0.029	0.017	0.011	0.009
25.8	0.048	0.028	0.03	0.019	0.029	0.017	0.011	0.009
26	0.048	0.028	0.03	0.019	0.028	0.017	0.01	0.009
26.2	0.047	0.028	0.03	0.019	0.028	0.017	0.01	0.009
26.4	0.048	0.028	0.03	0.019	0.029	0.017	0.01	0.009
26.6	0.048	0.029	0.03	0.019	0.029	0.017	0.01	0.009
26.8	0.048	0.029	0.03	0.019	0.029	0.018	0.01	0.009
27	0.048	0.029	0.03	0.02	0.029	0.018	0.01	0.009
27.2	0.048	0.029	0.03	0.02	0.029	0.018	0.01	0.009
27.4	0.048	0.029	0.03	0.02	0.03	0.018	0.01	0.009
27.6	0.048	0.03	0.03	0.02	0.029	0.018	0.009	0.009
27.8	0.048	0.03	0.031	0.02	0.03	0.018	0.009	0.009
28	0.047	0.03	0.03	0.02	0.03	0.018	0.009	0.009
28.2	0.048	0.03	0.03	0.02	0.03	0.018	0.01	0.009
28.4	0.048	0.03	0.031	0.02	0.03	0.019	0.01	0.009
28.6	0.048	0.031	0.031	0.021	0.031	0.019	0.01	0.009
28.8	0.049	0.031	0.031	0.021	0.031	0.019	0.01	0.01
29	0.049	0.031	0.031	0.021	0.031	0.019	0.011	0.01
29.2	0.049	0.031	0.031	0.021	0.03	0.019	0.01	0.01
29.4	0.049	0.031	0.032	0.021	0.03	0.019	0.011	0.01
29.6	0.049	0.032	0.032	0.021	0.03	0.019	0.011	0.01
29.8	0.05	0.032	0.033	0.021	0.03	0.019	0.011	0.01
30	0.05	0.032	0.033	0.022	0.03	0.02	0.011	0.01
30.2	0.05	0.032	0.033	0.022	0.031	0.02	0.011	0.01
30.4	0.051	0.032	0.034	0.022	0.032	0.02	0.012	0.01
30.6	0.051	0.032	0.034	0.022	0.031	0.02	0.012	0.01
30.8	0.052	0.033	0.034	0.022	0.032	0.02	0.012	0.01
31	0.051	0.033	0.035	0.022	0.032	0.02	0.012	0.01
31.2	0.052	0.033	0.035	0.022	0.032	0.02	0.012	0.01
31.4	0.052	0.033	0.035	0.022	0.032	0.02	0.012	0.01
31.6	0.052	0.033	0.035	0.023	0.032	0.02	0.012	0.01
31.8	0.052	0.034	0.035	0.023	0.032	0.021	0.012	0.01
32	0.052	0.034	0.035	0.023	0.033	0.021	0.012	0.011
32.2	0.052	0.034	0.035	0.023	0.033	0.021	0.012	0.011
32.4	0.052	0.034	0.034	0.023	0.033	0.021	0.012	0.011
32.6	0.052	0.034	0.034	0.023	0.032	0.021	0.012	0.011
32.8	0.052	0.035	0.034	0.023	0.032	0.021	0.012	0.011
33	0.052	0.035	0.034	0.023	0.032	0.021	0.011	0.011
33.2	0.052	0.035	0.034	0.024	0.032	0.021	0.012	0.011
33.4	0.052	0.035	0.034	0.024	0.032	0.021	0.012	0.011
33.6	0.052	0.035	0.034	0.024	0.032	0.022	0.011	0.011
33.8	0.053	0.036	0.034	0.024	0.033	0.022	0.012	0.011
34	0.052	0.036	0.034	0.024	0.033	0.022	0.011	0.011
34.2	0.053	0.036	0.034	0.024	0.034	0.022	0.011	0.011
34.4	0.053	0.036	0.033	0.024	0.034	0.022	0.011	0.011
34.6	0.053	0.036	0.034	0.025	0.034	0.022	0.011	0.011
34.8	0.054	0.036	0.034	0.025	0.034	0.022	0.011	0.011
35	0.054	0.037	0.035	0.025	0.034	0.022	0.012	0.011
35.2	0.056	0.037	0.036	0.025	0.035	0.022	0.012	0.011
35.4	0.056	0.037	0.036	0.025	0.036	0.023	0.013	0.012
35.6	0.056	0.037	0.036	0.025	0.036	0.023	0.012	0.012
35.8	0.057	0.037	0.036	0.025	0.036	0.023	0.012	0.012
36	0.057	0.038	0.036	0.025	0.036	0.023	0.013	0.012
36.2	0.058	0.038	0.037	0.026	0.036	0.023	0.013	0.012
36.4	0.058	0.038	0.037	0.026	0.036	0.023	0.013	0.012
36.6	0.058	0.038	0.037	0.026	0.037	0.023	0.014	0.012
36.8	0.058	0.038	0.038	0.026	0.036	0.023	0.014	0.012
37	0.058	0.039	0.038	0.026	0.036	0.023	0.014	0.012
37.2	0.058	0.039	0.038	0.026	0.036	0.024	0.014	0.012
37.4	0.057	0.039	0.038	0.026	0.036	0.024	0.014	0.012
37.6	0.057	0.039	0.038	0.026	0.036	0.024	0.014	0.012
37.8	0.058	0.039	0.038	0.027	0.036	0.024	0.014	0.012
38	0.057	0.039	0.038	0.027	0.036	0.024	0.014	0.012
38.2	0.057	0.04	0.038	0.027	0.035	0.024	0.014	0.012
38.4	0.056	0.04	0.038	0.027	0.035	0.024	0.014	0.012
38.6	0.057	0.04	0.038	0.027	0.035	0.024	0.014	0.012
38.8	0.056	0.04	0.037	0.027	0.034	0.024	0.014	0.012
39	0.056	0.04	0.038	0.027	0.034	0.025	0.014	0.013
39.2	0.056	0.041	0.037	0.027	0.034	0.025	0.013	0.013
39.4	0.056	0.041	0.037	0.028	0.034	0.025	0.013	0.013
39.6	0.056	0.041	0.036	0.028	0.034	0.025	0.012	0.013
39.8	0.057	0.041	0.036	0.028	0.034	0.025	0.012	0.013
40	0.057	0.041	0.037	0.028	0.034	0.025	0.012	0.013
40.2	0.057	0.041	0.037	0.028	0.034	0.025	0.012	0.013
40.4	0.058	0.042	0.037	0.028	0.034	0.025	0.012	0.013
40.6	0.058	0.042	0.037	0.028	0.034	0.025	0.012	0.013
40.8	0.058	0.042	0.038	0.028	0.034	0.026	0.012	0.013
41	0.059	0.042	0.038	0.029	0.035	0.026	0.012	0.013
41.2	0.059	0.042	0.039	0.029	0.036	0.026	0.012	0.013
41.4	0.059	0.043	0.039	0.029	0.036	0.026	0.013	0.013
41.6	0.06	0.043	0.04	0.029	0.036	0.026	0.012	0.013
41.8	0.06	0.043	0.04	0.029	0.037	0.026	0.013	0.013
42	0.06	0.043	0.041	0.029	0.037	0.026	0.013	0.013
42.2	0.06	0.043	0.041	0.029	0.037	0.026	0.013	0.013
42.4	0.06	0.043	0.041	0.029	0.037	0.026	0.014	0.014
42.6	0.061	0.044	0.041	0.03	0.037	0.027	0.014	0.014
42.8	0.061	0.044	0.04	0.03	0.036	0.027	0.014	0.014
43	0.06	0.044	0.04	0.03	0.036	0.027	0.014	0.014
43.2	0.061	0.044	0.04	0.03	0.036	0.027	0.014	0.014
43.4	0.062	0.044	0.04	0.03	0.037	0.027	0.015	0.014
43.6	0.062	0.044	0.041	0.03	0.037	0.027	0.015	0.014
43.8	0.062	0.045	0.04	0.03	0.037	0.027	0.015	0.014
44	0.062	0.045	0.041	0.03	0.038	0.027	0.015	0.014
44.2	0.062	0.045	0.041	0.03	0.038	0.027	0.015	0.014
44.4	0.062	0.045	0.04	0.031	0.038	0.028	0.015	0.014
44.6	0.062	0.045	0.041	0.031	0.038	0.028	0.016	0.014
44.8	0.061	0.046	0.041	0.031	0.038	0.028	0.015	0.014
45	0.062	0.046	0.041	0.031	0.038	0.028	0.015	0.014
45.2	0.061	0.046	0.041	0.031	0.038	0.028	0.015	0.014
45.4	0.061	0.046	0.041	0.031	0.038	0.028	0.014	0.014
45.6	0.061	0.046	0.041	0.031	0.038	0.028	0.014	0.014
45.8	0.062	0.046	0.041	0.031	0.038	0.028	0.015	0.014
46	0.061	0.047	0.041	0.032	0.038	0.028	0.015	0.014
46.2	0.062	0.047	0.041	0.032	0.037	0.028	0.014	0.015
46.4	0.062	0.047	0.041	0.032	0.037	0.029	0.014	0.015
46.6	0.062	0.047	0.041	0.032	0.037	0.029	0.014	0.015
46.8	0.063	0.047	0.041	0.032	0.037	0.029	0.014	0.015
47	0.064	0.047	0.042	0.032	0.038	0.029	0.015	0.015
47.2	0.064	0.048	0.042	0.032	0.038	0.029	0.015	0.015
47.4	0.065	0.048	0.042	0.032	0.039	0.029	0.016	0.015
47.6	0.065	0.048	0.043	0.033	0.039	0.029	0.017	0.015
47.8	0.066	0.048	0.042	0.033	0.039	0.029	0.017	0.015
48	0.066	0.048	0.043	0.033	0.041	0.029	0.018	0.015
48.2	0.067	0.048	0.043	0.033	0.041	0.029	0.018	0.015
48.4	0.067	0.049	0.043	0.033	0.041	0.03	0.018	0.015
48.6	0.067	0.049	0.044	0.033	0.041	0.03	0.017	0.015
48.8	0.067	0.049	0.044	0.033	0.041	0.03	0.017	0.015
49	0.067	0.049	0.045	0.033	0.041	0.03	0.017	0.015
49.2	0.066	0.049	0.045	0.033	0.041	0.03	0.017	0.015
49.4	0.067	0.05	0.045	0.034	0.041	0.03	0.016	0.015
49.6	0.066	0.05	0.045	0.034	0.042	0.03	0.016	0.015
49.8	0.066	0.05	0.045	0.034	0.041	0.03	0.016	0.016
50	0.066	0.05	0.045	0.034	0.041	0.03	0.016	0.016
50.2	0.067	0.05	0.044	0.034	0.04	0.031	0.015	0.016
50.4	0.067	0.05	0.044	0.034	0.04	0.031	0.015	0.016
50.6	0.067	0.051	0.045	0.034	0.04	0.031	0.015	0.016
50.8	0.068	0.051	0.045	0.034	0.041	0.031	0.016	0.016
51	0.068	0.051	0.045	0.035	0.041	0.031	0.017	0.016
51.2	0.068	0.051	0.045	0.035	0.041	0.031	0.017	0.016
51.4	0.068	0.051	0.045	0.035	0.041	0.031	0.017	0.016
51.6	0.068	0.051	0.044	0.035	0.041	0.031	0.018	0.016
51.8	0.068	0.052	0.044	0.035	0.041	0.031	0.018	0.016
52	0.069	0.052	0.044	0.035	0.041	0.031	0.018	0.016
52.2	0.069	0.052	0.044	0.035	0.041	0.032	0.018	0.016
52.4	0.069	0.052	0.044	0.035	0.04	0.032	0.018	0.016
52.6	0.069	0.052	0.044	0.035	0.04	0.032	0.018	0.016
52.8	0.069	0.052	0.045	0.036	0.041	0.032	0.018	0.016
53	0.07	0.053	0.045	0.036	0.041	0.032	0.018	0.016
53.2	0.069	0.053	0.045	0.036	0.041	0.032	0.018	0.016
53.4	0.069	0.053	0.045	0.036	0.041	0.032	0.018	0.016
53.6	0.069	0.053	0.045	0.036	0.042	0.032	0.018	0.017
53.8	0.07	0.053	0.045	0.036	0.042	0.032	0.018	0.017
54	0.07	0.053	0.046	0.036	0.042	0.032	0.017	0.017
54.2	0.07	0.054	0.046	0.036	0.042	0.033	0.017	0.017
54.4	0.069	0.054	0.046	0.036	0.042	0.033	0.017	0.017
54.6	0.069	0.054	0.046	0.037	0.043	0.033	0.018	0.017
54.8	0.069	0.054	0.046	0.037	0.043	0.033	0.018	0.017
55	0.068	0.054	0.046	0.037	0.043	0.033	0.018	0.017
55.2	0.068	0.054	0.045	0.037	0.042	0.033	0.018	0.017
55.4	0.067	0.055	0.045	0.037	0.042	0.033	0.017	0.017
55.6	0.067	0.055	0.045	0.037	0.042	0.033	0.017	0.017
55.8	0.067	0.055	0.045	0.037	0.042	0.033	0.018	0.017
56	0.067	0.055	0.045	0.037	0.042	0.033	0.018	0.017
56.2	0.067	0.055	0.046	0.038	0.042	0.033	0.018	0.017
56.4	0.068	0.055	0.046	0.038	0.041	0.034	0.018	0.017
56.6	0.068	0.056	0.046	0.038	0.041	0.034	0.018	0.017
56.8	0.068	0.056	0.047	0.038	0.041	0.034	0.018	0.017
57	0.069	0.056	0.047	0.038	0.041	0.034	0.018	0.017
57.2	0.07	0.056	0.047	0.038	0.041	0.034	0.018	0.017
57.4	0.07	0.056	0.047	0.038	0.041	0.034	0.018	0.018
57.6	0.071	0.056	0.047	0.038	0.042	0.034	0.018	0.018
57.8	0.072	0.057	0.047	0.038	0.042	0.034	0.019	0.018
58	0.072	0.057	0.047	0.039	0.042	0.034	0.018	0.018
58.2	0.073	0.057	0.047	0.039	0.042	0.034	0.018	0.018
58.4	0.073	0.057	0.047	0.039	0.042	0.035	0.019	0.018
58.6	0.074	0.057	0.047	0.039	0.042	0.035	0.019	0.018
58.8	0.074	0.057	0.047	0.039	0.042	0.035	0.019	0.018
59	0.074	0.057	0.047	0.039	0.042	0.035	0.02	0.018
59.2	0.074	0.058	0.048	0.039	0.042	0.035	0.02	0.018
59.4	0.074	0.058	0.048	0.039	0.042	0.035	0.02	0.018
59.6	0.074	0.058	0.048	0.039	0.043	0.035	0.02	0.018
59.8	0.074	0.058	0.048	0.04	0.043	0.035	0.021	0.018
60	0.073	0.058	0.049	0.04	0.043	0.035	0.021	0.018
60.2	0.073	0.058	0.049	0.04	0.044	0.035	0.021	0.018
60.4	0.073	0.059	0.049	0.04	0.044	0.035	0.02	0.018
60.6	0.073	0.059	0.049	0.04	0.045	0.036	0.02	0.018
60.8	0.073	0.059	0.049	0.04	0.045	0.036	0.02	0.018
61	0.073	0.059	0.05	0.04	0.045	0.036	0.019	0.018
61.2	0.073	0.059	0.049	0.04	0.045	0.036	0.019	0.018
61.4	0.072	0.059	0.049	0.04	0.045	0.036	0.018	0.019
61.6	0.073	0.06	0.049	0.041	0.046	0.036	0.018	0.019
61.8	0.073	0.06	0.049	0.041	0.046	0.036	0.018	0.019
62	0.073	0.06	0.049	0.041	0.045	0.036	0.017	0.019
62.2	0.073	0.06	0.048	0.041	0.045	0.036	0.017	0.019
62.4	0.073	0.06	0.049	0.041	0.045	0.036	0.018	0.019
62.6	0.073	0.06	0.049	0.041	0.045	0.037	0.018	0.019
62.8	0.073	0.06	0.049	0.041	0.044	0.037	0.018	0.019
63	0.073	0.061	0.049	0.041	0.044	0.037	0.019	0.019
63.2	0.074	0.061	0.05	0.041	0.044	0.037	0.019	0.019
63.4	0.074	0.061	0.049	0.042	0.043	0.037	0.019	0.019
63.6	0.074	0.061	0.049	0.042	0.043	0.037	0.018	0.019
63.8	0.074	0.061	0.049	0.042	0.044	0.037	0.019	0.019
64	0.075	0.061	0.05	0.042	0.043	0.037	0.019	0.019
64.2	0.075	0.062	0.05	0.042	0.044	0.037	0.018	0.019
64.4	0.075	0.062	0.049	0.042	0.044	0.037	0.018	0.019
64.6	0.075	0.062	0.05	0.042	0.044	0.037	0.018	0.019
64.8	0.076	0.062	0.05	0.042	0.044	0.038	0.019	0.019
65	0.076	0.062	0.05	0.042	0.044	0.038	0.019	0.019
65.2	0.076	0.062	0.05	0.042	0.044	0.038	0.019	0.019
65.4	0.076	0.063	0.051	0.043	0.045	0.038	0.019	0.019
65.6	0.076	0.063	0.051	0.043	0.045	0.038	0.019	0.02
65.8	0.076	0.063	0.051	0.043	0.045	0.038	0.019	0.02
66	0.077	0.063	0.052	0.043	0.046	0.038	0.019	0.02
66.2	0.077	0.063	0.052	0.043	0.046	0.038	0.019	0.02
66.4	0.077	0.063	0.052	0.043	0.047	0.038	0.02	0.02
66.6	0.077	0.063	0.052	0.043	0.046	0.038	0.02	0.02
66.8	0.077	0.064	0.052	0.043	0.046	0.038	0.02	0.02
67	0.077	0.064	0.053	0.043	0.047	0.039	0.02	0.02
67.2	0.077	0.064	0.053	0.044	0.047	0.039	0.02	0.02
67.4	0.077	0.064	0.053	0.044	0.047	0.039	0.02	0.02
67.6	0.078	0.064	0.053	0.044	0.047	0.039	0.02	0.02
67.8	0.078	0.064	0.052	0.044	0.047	0.039	0.02	0.02
68	0.078	0.064	0.053	0.044	0.047	0.039	0.02	0.02
68.2	0.077	0.065	0.053	0.044	0.047	0.039	0.019	0.02
68.4	0.077	0.065	0.053	0.044	0.046	0.039	0.019	0.02
68.6	0.078	0.065	0.053	0.044	0.047	0.039	0.02	0.02
68.8	0.078	0.065	0.053	0.044	0.047	0.039	0.02	0.02
69	0.078	0.065	0.053	0.044	0.046	0.039	0.019	0.02
69.2	0.078	0.065	0.052	0.045	0.046	0.04	0.019	0.02
69.4	0.078	0.066	0.052	0.045	0.047	0.04	0.019	0.02
69.6	0.077	0.066	0.053	0.045	0.047	0.04	0.019	0.021
69.8	0.078	0.066	0.053	0.045	0.047	0.04	0.019	0.021
70	0.078	0.066	0.053	0.045	0.047	0.04	0.019	0.021
70.2	0.078	0.066	0.053	0.045	0.046	0.04	0.019	0.021
70.4	0.078	0.066	0.053	0.045	0.046	0.04	0.019	0.021
70.6	0.078	0.066	0.053	0.045	0.046	0.04	0.019	0.021
70.8	0.078	0.067	0.053	0.045	0.046	0.04	0.019	0.021
71	0.078	0.067	0.053	0.046	0.046	0.04	0.019	0.021
71.2	0.078	0.067	0.053	0.046	0.046	0.04	0.019	0.021
71.4	0.079	0.067	0.053	0.046	0.046	0.04	0.02	0.021
71.6	0.079	0.067	0.053	0.046	0.046	0.041	0.019	0.021
71.8	0.079	0.067	0.054	0.046	0.047	0.041	0.02	0.021
72	0.079	0.067	0.054	0.046	0.047	0.041	0.02	0.021
72.2	0.079	0.068	0.054	0.046	0.047	0.041	0.02	0.021
72.4	0.079	0.068	0.054	0.046	0.047	0.041	0.02	0.021
72.6	0.08	0.068	0.054	0.046	0.047	0.041	0.02	0.021
72.8	0.079	0.068	0.053	0.046	0.047	0.041	0.02	0.021
73	0.079	0.068	0.053	0.047	0.046	0.041	0.019	0.021
73.2	0.079	0.068	0.053	0.047	0.046	0.041	0.019	0.021
73.4	0.079	0.069	0.053	0.047	0.046	0.041	0.02	0.021
73.6	0.079	0.069	0.054	0.047	0.046	0.041	0.02	0.021
73.8	0.078	0.069	0.054	0.047	0.046	0.042	0.019	0.021
74	0.078	0.069	0.054	0.047	0.045	0.042	0.019	0.022
74.2	0.078	0.069	0.054	0.047	0.045	0.042	0.019	0.022
74.4	0.078	0.069	0.054	0.047	0.045	0.042	0.02	0.022
74.6	0.079	0.069	0.054	0.047	0.045	0.042	0.02	0.022
74.8	0.079	0.07	0.055	0.047	0.046	0.042	0.02	0.022
75	0.079	0.07	0.055	0.048	0.046	0.042	0.021	0.022
75.2	0.08	0.07	0.056	0.048	0.047	0.042	0.021	0.022
75.4	0.08	0.07	0.056	0.048	0.048	0.042	0.021	0.022
75.6	0.081	0.07	0.056	0.048	0.048	0.042	0.021	0.022
75.8	0.082	0.07	0.057	0.048	0.049	0.042	0.022	0.022
76	0.082	0.07	0.056	0.048	0.049	0.042	0.022	0.022
76.2	0.083	0.071	0.057	0.048	0.049	0.043	0.022	0.022
76.4	0.084	0.071	0.057	0.048	0.05	0.043	0.022	0.022
76.6	0.084	0.071	0.057	0.048	0.05	0.043	0.022	0.022
76.8	0.084	0.071	0.057	0.049	0.05	0.043	0.022	0.022
77	0.084	0.071	0.057	0.049	0.05	0.043	0.022	0.022
77.2	0.083	0.071	0.056	0.049	0.05	0.043	0.022	0.022
77.4	0.083	0.071	0.056	0.049	0.05	0.043	0.022	0.022
77.6	0.083	0.072	0.056	0.049	0.05	0.043	0.022	0.022
77.8	0.082	0.072	0.056	0.049	0.049	0.043	0.022	0.022
78	0.083	0.072	0.055	0.049	0.049	0.043	0.022	0.022
78.2	0.082	0.072	0.055	0.049	0.049	0.043	0.022	0.022
78.4	0.082	0.072	0.055	0.049	0.049	0.043	0.022	0.023
78.6	0.083	0.072	0.055	0.049	0.05	0.044	0.023	0.023
78.8	0.083	0.072	0.055	0.05	0.05	0.044	0.022	0.023
79	0.083	0.073	0.056	0.05	0.05	0.044	0.022	0.023
79.2	0.083	0.073	0.056	0.05	0.05	0.044	0.022	0.023
79.4	0.083	0.073	0.055	0.05	0.049	0.044	0.022	0.023
79.6	0.083	0.073	0.056	0.05	0.05	0.044	0.022	0.023
79.8	0.084	0.073	0.056	0.05	0.05	0.044	0.022	0.023
80	0.084	0.073	0.056	0.05	0.05	0.044	0.022	0.023
80.2	0.084	0.073	0.057	0.05	0.051	0.044	0.022	0.023
80.4	0.085	0.074	0.057	0.05	0.051	0.044	0.022	0.023
80.6	0.084	0.074	0.057	0.05	0.051	0.044	0.022	0.023
80.8	0.084	0.074	0.057	0.05	0.05	0.044	0.022	0.023
81	0.084	0.074	0.057	0.051	0.05	0.045	0.021	0.023
81.2	0.084	0.074	0.056	0.051	0.05	0.045	0.021	0.023
81.4	0.084	0.074	0.056	0.051	0.049	0.045	0.021	0.023
81.6	0.085	0.074	0.056	0.051	0.049	0.045	0.021	0.023
81.8	0.085	0.075	0.056	0.051	0.049	0.045	0.021	0.023
82	0.085	0.075	0.056	0.051	0.049	0.045	0.021	0.023
82.2	0.085	0.075	0.057	0.051	0.049	0.045	0.021	0.023
82.4	0.085	0.075	0.057	0.051	0.049	0.045	0.021	0.023
82.6	0.085	0.075	0.057	0.051	0.049	0.045	0.021	0.023
82.8	0.085	0.075	0.057	0.051	0.049	0.045	0.021	0.024
83	0.085	0.075	0.058	0.052	0.049	0.045	0.021	0.024
83.2	0.086	0.075	0.058	0.052	0.05	0.045	0.022	0.024
83.4	0.086	0.076	0.058	0.052	0.05	0.046	0.022	0.024
83.6	0.086	0.076	0.059	0.052	0.051	0.046	0.023	0.024
83.8	0.086	0.076	0.058	0.052	0.05	0.046	0.023	0.024
84	0.086	0.076	0.058	0.052	0.051	0.046	0.023	0.024
84.2	0.086	0.076	0.058	0.052	0.05	0.046	0.023	0.024
84.4	0.086	0.076	0.059	0.052	0.051	0.046	0.023	0.024
84.6	0.086	0.076	0.059	0.052	0.05	0.046	0.022	0.024
84.8	0.086	0.077	0.059	0.052	0.05	0.046	0.022	0.024
85	0.086	0.077	0.059	0.053	0.05	0.046	0.022	0.024
85.2	0.086	0.077	0.058	0.053	0.05	0.046	0.022	0.024
85.4	0.086	0.077	0.058	0.053	0.05	0.046	0.022	0.024
85.6	0.086	0.077	0.058	0.053	0.05	0.046	0.022	0.024
85.8	0.086	0.077	0.058	0.053	0.05	0.046	0.022	0.024
86	0.086	0.077	0.059	0.053	0.05	0.047	0.021	0.024
86.2	0.086	0.078	0.059	0.053	0.05	0.047	0.021	0.024
86.4	0.086	0.078	0.059	0.053	0.051	0.047	0.021	0.024
86.6	0.086	0.078	0.059	0.053	0.051	0.047	0.021	0.024
86.8	0.086	0.078	0.059	0.053	0.051	0.047	0.021	0.024
87	0.087	0.078	0.06	0.053	0.051	0.047	0.021	0.024
87.2	0.087	0.078	0.059	0.054	0.052	0.047	0.022	0.024
87.4	0.087	0.078	0.059	0.054	0.052	0.047	0.022	0.024
87.6	0.088	0.078	0.059	0.054	0.052	0.047	0.022	0.025
87.8	0.088	0.079	0.059	0.054	0.052	0.047	0.022	0.025
88	0.089	0.079	0.06	0.054	0.053	0.047	0.023	0.025
88.2	0.089	0.079	0.06	0.054	0.053	0.047	0.024	0.025
88.4	0.089	0.079	0.06	0.054	0.054	0.047	0.024	0.025
88.6	0.089	0.079	0.061	0.054	0.054	0.048	0.024	0.025
88.8	0.089	0.079	0.061	0.054	0.054	0.048	0.024	0.025
89	0.089	0.079	0.06	0.054	0.053	0.048	0.024	0.025
89.2	0.089	0.08	0.06	0.055	0.054	0.048	0.024	0.025
89.4	0.089	0.08	0.061	0.055	0.053	0.048	0.025	0.025
89.6	0.089	0.08	0.061	0.055	0.054	0.048	0.025	0.025
89.8	0.089	0.08	0.061	0.055	0.054	0.048	0.025	0.025
90	0.09	0.08	0.061	0.055	0.054	0.048	0.025	0.025
90.2	0.09	0.08	0.062	0.055	0.054	0.048	0.025	0.025
90.4	0.09	0.08	0.062	0.055	0.055	0.048	0.024	0.025
90.6	0.09	0.08	0.062	0.055	0.054	0.048	0.024	0.025
90.8	0.09	0.081	0.062	0.055	0.054	0.048	0.023	0.025
91	0.09	0.081	0.062	0.055	0.054	0.048	0.023	0.025
91.2	0.09	0.081	0.062	0.055	0.054	0.049	0.022	0.025
91.4	0.09	0.081	0.062	0.056	0.053	0.049	0.023	0.025
91.6	0.09	0.081	0.062	0.056	0.053	0.049	0.023	0.025
91.8	0.091	0.081	0.062	0.056	0.053	0.049	0.024	0.025
92	0.091	0.081	0.062	0.056	0.054	0.049	0.024	0.025
92.2	0.09	0.082	0.062	0.056	0.054	0.049	0.024	0.026
92.4	0.09	0.082	0.062	0.056	0.053	0.049	0.024	0.026
92.6	0.089	0.082	0.062	0.056	0.053	0.049	0.023	0.026
92.8	0.089	0.082	0.062	0.056	0.053	0.049	0.023	0.026
93	0.089	0.082	0.062	0.056	0.053	0.049	0.024	0.026
93.2	0.089	0.082	0.061	0.056	0.053	0.049	0.024	0.026
93.4	0.089	0.082	0.061	0.056	0.053	0.049	0.024	0.026
93.6	0.09	0.082	0.062	0.057	0.054	0.049	0.024	0.026
93.8	0.09	0.083	0.061	0.057	0.054	0.05	0.024	0.026
94	0.09	0.083	0.061	0.057	0.055	0.05	0.024	0.026
94.2	0.09	0.083	0.061	0.057	0.055	0.05	0.023	0.026
94.4	0.091	0.083	0.061	0.057	0.055	0.05	0.023	0.026
94.6	0.09	0.083	0.06	0.057	0.054	0.05	0.023	0.026
94.8	0.091	0.083	0.061	0.057	0.054	0.05	0.023	0.026
95	0.091	0.083	0.061	0.057	0.053	0.05	0.023	0.026
95.2	0.091	0.083	0.061	0.057	0.053	0.05	0.023	0.026
95.4	0.091	0.084	0.061	0.057	0.053	0.05	0.024	0.026
95.6	0.091	0.084	0.061	0.057	0.053	0.05	0.023	0.026
95.8	0.091	0.084	0.061	0.058	0.052	0.05	0.023	0.026
96	0.09	0.084	0.061	0.058	0.052	0.05	0.023	0.026
96.2	0.09	0.084	0.061	0.058	0.052	0.05	0.023	0.026
96.4	0.09	0.084	0.062	0.058	0.052	0.051	0.023	0.026
96.6	0.09	0.084	0.062	0.058	0.052	0.051	0.024	0.026
[truncated: 5,516 more rows]

## Sheet: Fig2f
Fig2.f Luciferase reporter assay for Nb8 surrogate
[truncated: 9 more rows]

[truncated: 9 more sheets: Fig3f, Fig3g, Fig4f, Fig4g, Fig5c, SuppFig3a, SuppFig3b, SuppFig4d, SuppFig12b]
